# Supplementary material
Source: Research Square preprint supplement (doi:10.21203/rs.3.rs-9414125/v1)
Supplement: Supplementary file 1 [file 362eba9d64f7f518a9b245a3.docx]

**TABLE I. CODING AND DATA SOURCES**

| **Code** | **Indicator** | **Measurement** | **Source** |
| --- | --- | --- | --- |
| **Dependent Variable** | | | |
| EP | Economic Prosperity | The economic prosperity indicator is coded as 1 for years in which the economic growth rate is higher than the country average, while a value of 0 is assigned to all remaining years. | Authors |
| ED | Economic Downturn | The economic downturn indicator equals 1 when the economic growth rate is negative, and takes the value 0 otherwise. | Authors |
| **Independent Variables** | | | |
| GA | Green Accounting | Green accounting is measured using a composite index constructed through Principal Component Analysis. Prior to applying PCA, all component variables are standardized to ensure comparability. | Authors |
| 1. FEC | Renewable Energy | Proportion of renewable energy in total final energy consumption (%). | WDI |
| 2. ELC | Renewable Electricity | Share of electricity generated from renewable sources relative to total electricity production. | WDI |
| 3. FRST | Forest Area Ratio | Share of forest land including natural and planted forests in total land area (%). | WDI |
| 4. TOTL | Total Resource Rents | Aggregate rents generated from natural resource extraction relative to gross domestic product (% GDP). | WDI |
| 5. H2O | Freshwater Withdrawals | Annual freshwater withdrawals relative to total internal renewable water resources (%). | WDI |
| 6. PRIW | Energy Intensity | Energy use measured in kilograms of oil equivalent per unit of GDP. | WDI |
| 7. DCO2 | Damage from CO2 Emissions | Estimated economic damage caused by carbon dioxide emissions (% GNI). | WDI |
| 8. DRES | Damage from Resource Extraction | Economic loss resulting from the depletion of natural resources including energy minerals and forests (% GNI). | WDI |
| 9. DPEM | Damage from Particulate Matter | Monetary value of health and environmental damage due to exposure to PM2.5 air pollution (% GNI). | WDI |
| 10. DFOR | Net Forest Depletion | Economic value of forest resource loss associated with deforestation activities (% GNI). | WDI |
| 11. DNGY | Energy Resource Depletion | Value of depletion of energy resources such as oil gas and coal (% GNI). | WDI |
| 12. DMIN | Mineral Depletion | Monetary value of mineral resource extraction and depletion (% GNI). | WDI |
| 13. COMM | Fossil Fuel Energy Consumption | Share of fossil fuel based energy consumption in total energy use (%). | WDI |
| 14. TAX | Environmental Taxes | Environmental tax revenue (% of GDP) | OECD |
| 15. GHG | Total greenhouse gas emissions | Total greenhouse gas emissions including CO2 CH4 N2O and F gases measured in CO2 equivalent. | WDI |
| 16. CRNW | Renewable Combustibles & Waste | Percentage of energy derived from renewable combustibles and waste in total energy consumption. | WDI |
| **Control Variables** | | | |
| UNE | Unemployment Rate | Percentage of the labor force that is unemployed and actively seeking work. | WB |
| INF | Inflation Rate | Annual percentage change in the Consumer Price Index. | WB |
| UR | Urban Population | Urban population as a share of total population (%). | WB |
| FDI | Foreign Direct Investment | Net inflows of foreign direct investment relative to GDP (%). | WB |
| TRADE | Trade openness | Ratio of total exports and imports of goods and services to GDP (%). | WB |

*Source: Authors’ compilation*
