# Supplementary material
Source: Research Square preprint supplement (doi:10.21203/rs.3.rs-9414125/v1)
Supplement: Supplementary file 2 [file fb4eb5087562771da491f080.xlsx]

## Sheet: DATA
Country	year	EE	ED	VA	RL	RQ	GE	CC	PV	CRNW	FEC	ELC	COMM	FRST	TOTL	H2O	PRIM	DRES	DPEM	DFOR	DCO2	DNGY	DMIN	TAX	GHG	GDPG	FDI	UR	TRADE	UNE	INF	IQ_RAW	IQ	EE	ED	GAI_RAW	GAI	GA	GAH1	GAH2
Argentina	2002	0	1	0.260063	-0.761098	-0.880717	-0.228479	-0.417056	-0.776545	3.29914	11.6	43.2402	-86.28	11.9653	-5.6309	-10.8555	-3.98	-4.71144	-0.17999	0	-2.55201	-4.58849	-0.122943	1.10123	-381.068	-10.8945	2.19896	89.51	41.7527	19.59	30.5552	-2.05271	-1.08039	0	1	0.0530723	0.257632	25.7632	0	0
Argentina	2003	1	0	0.349125	-0.777116	-0.691476	-0.03422	-0.479977	-0.359838	3.52948	10.8	37.8812	-86.57	11.8496	-4.54405	-11.0834	-3.96	-3.81014	-0.151862	0	-2.19066	-3.69534	-0.114795	1.24407	-401.163	8.83704	1.29481	89.686	40.6447	15.36	10.4957	-1.68692	-0.878414	1	0	-0.0238213	0.233483	23.3483	0	0
Argentina	2004	1	0	0.362041	-0.76738	-0.698035	0.0151974	-0.41441	-0.610935	3.06479	9.3	31.5189	-88.61	11.734	-4.29522	-11.3113	-4.04	-3.92465	-0.13573	0	-2.13115	-3.77457	-0.150082	1.37627	-428.36	9.02957	2.50502	89.86	40.6926	13.522	18.3634	-1.73738	-0.906279	1	0	-0.0339914	0.230289	23.0289	0	0
Argentina	2005	1	0	0.269232	-0.557991	-0.525074	-0.0979791	-0.377738	-0.0417749	3.26743	9.6	33.7206	-88.13	11.6184	-5.18727	-11.5393	-3.68	-4.87656	-0.117539	0	-1.92823	-4.73733	-0.139222	1.3029	-420.328	8.85166	2.64935	90.031	40.5513	11.506	10.3175	-1.39305	-0.716151	1	0	0.0022951	0.241685	24.1685	0	0
Argentina	2006	1	0	0.403437	-0.577016	-0.614567	-0.0339163	-0.331239	0.00196776	2.66565	9.2	34.7397	-88.44	11.5028	-5.77561	-11.7672	-3.58	-4.76929	-0.0964418	0	-1.6891	-4.43305	-0.336245	1.20664	-450.629	8.04715	2.38107	90.2	40.4335	10.078	13.7411	-1.31853	-0.675006	1	0	-0.0093791	0.238018	23.8019	0	0
Argentina	2007	1	0	0.448621	-0.601472	-0.635694	-0.0125325	-0.372122	0.0977966	2.56085	7.7	29.2268	-89.44	11.3872	-4.83862	-11.9952	-3.44	-3.93419	-0.0936576	0	-1.49749	-3.68013	-0.254064	1.10644	-466.744	9.00765	2.25129	90.366	40.9452	8.47	14.9399	-1.28609	-0.657093	1	0	-0.0775984	0.216593	21.6593	0	0
Argentina	2008	1	0	0.358896	-0.699732	-0.702629	-0.123509	-0.434875	-0.0877557	2.57231	7.7	27.4501	-89.93	11.2716	-4.94938	-12.2231	-3.42	-4.08992	-0.095534	0	-1.2728	-3.90026	-0.189658	1.11101	-444.253	4.05723	2.6899	90.53	40.4027	7.837	23.1712	-1.55905	-0.807808	1	0	-0.0815903	0.215339	21.5339	0	0
Argentina	2009	0	1	0.280091	-0.694468	-0.830837	-0.294032	-0.445475	-0.234855	2.80948	8.6	30.4954	-88.13	11.156	-3.09835	-12.4511	-3.35	-2.51931	-0.11146	0	-1.33978	-2.3271	-0.19221	1.23536	-397.557	-5.91853	1.20644	90.691	34.0571	8.645	15.3776	-1.79977	-0.940727	0	1	-0.173624	0.186435	18.6435	0	0
Argentina	2010	1	0	0.36167	-0.598094	-0.742941	-0.111792	-0.35523	-0.0847979	3.24046	8.8	28.6335	-88.53	11.0403	-3.2571	-12.679	-3.26	-2.57401	-0.10806	0	-1.16787	-2.24205	-0.331959	1.17258	-406.606	10.1254	2.67516	90.849	34.971	7.714	20.9151	-1.49242	-0.771021	1	0	-0.183042	0.183477	18.3477	0	0
Argentina	2011	1	0	0.344942	-0.563123	-0.701964	-0.0723611	-0.364099	0.158994	3.56549	8.8	26.3898	-88.88	10.9587	-3.8865	-12.9075	-3.18	-3.11822	-0.110884	0	-1.02307	-2.78035	-0.337871	1.0876	-390.834	6.00395	2.04466	90.99	35.2062	7.18	23.7035	-1.34593	-0.690131	1	0	-0.161927	0.190109	19.0108	0	0
Argentina	2012	0	1	0.29521	-0.623034	-0.897687	-0.206967	-0.445909	0.103041	3.57858	8.6	24.284	-89.52	10.8771	-3.62565	-12.9075	-3.3	-2.92725	-0.118791	0	-1.03724	-2.64833	-0.278916	1.2494	-435.788	-1.02642	2.80667	91.121	30.5265	7.217	22.3149	-1.61068	-0.83632	0	1	-0.171087	0.187232	18.7232	0	0
Argentina	2013	0	0	0.276934	-0.656329	-0.928135	-0.254237	-0.434307	0.0653143	3.69148	8.9	26.3674	-89.08	10.7954	-3.15559	-12.9075	-3.31	-2.53737	-0.125402	0	-1.09659	-2.38631	-0.151063	1.21856	-438.728	2.40532	1.77921	91.249	29.3339	7.1	23.9488	-1.68159	-0.875471	0	0	-0.186451	0.182406	18.2406	0	0
Argentina	2014	0	1	0.345272	-0.866627	-1.06615	-0.111114	-0.549791	-0.00512187	3.82003	9.8	25.6717	-89.05	10.7138	-2.96562	-12.9075	-3.4	-2.36143	-0.136255	0	-1.17301	-2.21104	-0.150391	1.24967	-409.796	-2.51262	0.962407	91.377	28.4068	7.268	40.283	-1.82671	-0.955603	0	1	-0.191782	0.180732	18.0732	0	0
Argentina	2015	0	0	0.411758	-0.748636	-0.898022	-0.0494756	-0.581265	0.00876413	3.91627	9.4	24.4205	-88.73	10.6322	-1.11677	-12.9075	-3.36	-0.841522	-0.138553	0	-1.10554	-0.789979	-0.051543	1.24597	-395.103	2.73116	1.97713	91.503	22.4862	7.579	26.58	-1.63989	-0.852448	0	0	-0.288477	0.150363	15.0363	0	0
Argentina	2016	0	1	0.493264	-0.32016	-0.347571	0.218796	-0.299236	0.19775	4.07405	9.4	22.7376	-88.42	10.6004	-0.929682	-12.9075	-3.41	-0.662926	-0.145535	0	-1.20634	-0.568187	-0.0947389	1.2215	-390.924	-2.08033	0.584749	91.627	26.0939	8.085	41.1194	-0.819568	-0.399496	0	1	-0.295262	0.148232	14.8232	0	0
Argentina	2017	0	0	0.528708	-0.237312	-0.19643	0.135086	-0.309002	0.162542	4.63268	10.4	24.5225	-88.18	10.5598	-1.02057	-12.9075	-3.32	-0.748123	-0.139136	0	-1.06977	-0.676135	-0.0719884	1.32232	-400.587	2.8185	1.78937	91.749	25.2896	8.347	26.0064	-0.748636	-0.360331	0	0	-0.295389	0.148192	14.8192	0	0
Argentina	2018	0	1	0.539253	-0.21933	-0.195978	0.0280606	-0.0992739	0.00690981	4.54732	10.5	25.0379	-87.73	10.5204	-2.03713	-12.9075	-3.31	-1.56382	-0.143675	0	-1.36945	-1.4373	-0.126523	1.08888	-401.133	-2.6174	2.23253	91.87	30.7625	9.22	42.0337	-0.76337	-0.368466	0	1	-0.231931	0.168122	16.8122	0	0
Argentina	2019	0	1	0.570875	-0.42736	-0.45308	-0.120795	-0.107116	-0.0978231	4.93558	10.7	26.5099	-86.82	10.4802	-2.16669	-12.9075	-3.35	-1.66722	-0.148376	0	-1.59355	-1.53656	-0.130662	1.09247	-368.678	-2.00086	1.48501	91.991	32.6306	9.843	49.1956	-1.08502	-0.546071	0	1	-0.2137	0.173848	17.3848	0	0
Argentina	2020	0	1	0.584501	-0.486266	-0.498344	-0.254262	-0.16357	-0.0719974	4.52353	9.8	27.2624	-86.38	10.4407	-1.42962	-12.9075	-3.46	-0.979579	-0.159898	0	-1.70003	-0.805651	-0.173928	1.07336	-415.162	-9.90048	1.26617	92.111	30.2037	11.461	40.0831	-1.2006	-0.609887	0	1	-0.245207	0.163953	16.3953	0	0
Armenia	2002	1	0	-0.444421	-0.438531	0.0563336	-0.0457693	-0.778165	-0.255784	0.523134	8.9	30.0326	-61.81	11.6693	-0.591149	-25.2515	-5.11	-0.462254	-0.412483	-0.0198508	-2.5573	0	-0.442403	0	-5.23166	13.2	4.6595	64.236	73.9845	10.833	2.3574	-1.60661	-0.834074	1	0	-0.187581	0.182051	18.2051	0	0
Armenia	2003	1	0	-0.467406	-0.302865	0.16757	-0.197254	-0.649022	0.236966	0.602729	9.8	36.028	-65.72	11.662	-0.0332346	-28.8089	-4.73	-0.0298418	-0.383027	-0.0262024	-2.53609	0	-0.00363938	0	-6.60042	14	4.37657	64.137	80.0514	10.705	4.59852	-1.30607	-0.668127	1	0	-0.220503	0.171711	17.1712	0	0
Armenia	2004	1	0	-0.572166	-0.481951	0.10925	-0.118263	-0.703455	-0.116337	0.600837	8.7	33.393	-66.91	11.6547	-0.0217229	-36.4922	-4.53	-0.0208578	-0.369268	-0.0208578	-2.22699	0	0	0	-6.13429	10.5	6.9099	64.038	73.0706	10.617	6.27859	-1.59987	-0.830352	1	0	-0.254065	0.161171	16.1171	0	0
Armenia	2005	1	0	-0.591363	-0.388777	0.0890627	-0.142498	-0.68335	-0.0663354	0.328913	6.5	28.0655	-68.11	11.6473	-0.0102575	-40.3995	-4.76	-0.00984367	-0.357541	-0.00984367	-2.03208	0	0	0	-6.85366	13.9	5.96011	63.938	70.1397	10.54	3.20876	-1.55792	-0.807188	1	0	-0.26782	0.156851	15.6851	0	0
Armenia	2006	1	0	-0.742223	-0.544567	0.292331	-0.261503	-0.669233	-0.261024	0.524582	7.7	30.7238	-67.5	11.64	-0.0158026	-41.2159	-4.28	-0.0150888	-0.350677	-0.0150888	-1.64678	0	0	0	-6.82566	13.2	7.30731	63.839	61.0301	10.465	4.61801	-1.72635	-0.900188	1	0	-0.29619	0.147941	14.7941	0	0
Armenia	2007	1	0	-0.759378	-0.496518	0.265207	-0.381907	-0.745892	0.150906	0.298855	7	31.4581	-70.56	11.6327	-0.00929598	-43.9131	-4.2	-0.00881946	-0.331629	-0.00881946	-1.38006	0	0	0	-7.56166	13.7	7.25233	63.739	56.975	10.394	4.27788	-1.63668	-0.850675	1	0	-0.316111	0.141684	14.1684	0	0
Armenia	2008	1	0	-0.85763	-0.337751	0.30094	-0.177953	-0.712412	-0.00685303	0.282219	6.4	31.1768	-73.29	11.6254	-0.213475	-41.8866	-4.14	-0.201529	-0.335854	-0.201529	-1.23616	0	0	0	-8.04375	6.9	8.09235	63.64	54.5423	17.1	5.98956	-1.5528	-0.80436	1	0	-0.312971	0.142671	14.267	0	0
Armenia	2009	0	1	-0.87642	-0.468711	0.273454	-0.0268956	-0.62146	0.227863	0.323927	7.8	35.6851	-68.21	11.6181	-0.37426	-35.9236	-4.18	-0.347525	-0.415679	-0.327672	-1.38291	0	-0.0198535	0	-6.76605	-14.1	8.78869	63.54	57.2742	19.295	2.49725	-1.42759	-0.735225	0	1	-0.279946	0.153042	15.3042	0	0
Armenia	2010	0	0	-0.847522	-0.481358	0.268947	-0.171523	-0.69504	0.0718553	0.339501	9.4	39.487	-67.41	11.6108	-2.65466	-30.9958	-3.9	-1.58088	-0.431837	-0.284005	-1.27621	0	-1.29688	0	-6.51375	2.2	5.71604	63.44	64.643	19.523	7.76872	-1.58499	-0.822131	0	0	-0.221119	0.171518	17.1518	0	0
Armenia	2011	1	0	-0.69078	-0.437706	0.246941	-0.115028	-0.664559	-0.063869	0.310444	8	33.5707	-71.56	11.6035	-2.92346	-35.5445	-4.07	-1.91609	-0.408348	-0.438088	-1.40306	0	-1.47801	0	-7.14513	4.7	6.44067	63.34	69.4356	18.884	4.28155	-1.52533	-0.789194	1	0	-0.210447	0.17487	17.487	0	0
Armenia	2012	1	0	-0.570491	-0.418282	0.334273	-0.0323866	-0.588001	0.154795	0.284589	6.6	28.8091	-77.34	11.5962	-1.49013	-42.878	-4.16	-0.9759	-0.374471	-0.339469	-1.60945	0	-0.636431	0	-8.03782	7.2	4.67673	63.24	75.9617	17.511	5.3458	-1.257	-0.641028	1	0	-0.264544	0.15788	15.788	0	0
Armenia	2013	0	0	-0.588099	-0.340889	0.235183	0.0783173	-0.530533	0.110385	0.292328	6.8	28.2387	-75.51	11.5889	-1.09715	-43.0821	-3.92	-0.695341	-0.34893	-0.21921	-1.50618	0	-0.476131	0	-8.06303	3.3	3.11193	63.164	77.555	16.576	3.36682	-1.22405	-0.622834	0	0	-0.291356	0.149459	14.9459	0	0
Armenia	2014	1	0	-0.562132	-0.417727	0.15852	-0.25733	-0.565447	-0.297136	1.07438	7.1	25.7659	-72.6	11.5816	-0.306949	-41.697	-4.12	-0.265696	-0.339521	-0.230508	-1.52094	0	-0.0351886	0.72852	-8.41595	3.6	3.50211	63.112	75.7789	17.498	2.30918	-1.6249	-0.844168	1	0	-0.308735	0.144001	14.4001	0	0
Armenia	2015	0	0	-0.536274	-0.462551	0.189177	-0.33179	-0.609747	-0.256799	2.94292	10.7	28.328	-68.89	11.5743	-0.760032	-47.7037	-4.12	-0.513002	-0.344836	-0.253863	-1.69087	0	-0.259139	0.619705	-8.34498	3.2	1.74474	63.085	71.6821	18.261	1.21391	-1.65317	-0.859782	0	0	-0.28227	0.152313	15.2313	0	0
Armenia	2016	0	0	-0.579093	-0.160894	0.205158	-0.312554	-0.659795	-0.667951	4.12684	13.2	32.1718	-69.08	11.5669	-0.221818	-46.3916	-3.93	-0.21678	-0.349326	-0.21678	-1.68722	0	0	0.540347	-8.16981	0.2	3.16537	63.082	76.078	17.617	0.268575	-1.71612	-0.89454	0	0	-0.295196	0.148253	14.8253	0	0
Armenia	2017	1	0	-0.56067	-0.209394	0.228397	-0.25155	-0.637015	-0.626211	4.11569	12.6	29.2531	-68.99	11.5595	-0.245816	-41.7699	-3.86	-0.23746	-0.309437	-0.23746	-1.68381	-4.09358e-09	0	0.720972	-8.39752	7.5	2.19257	63.103	87.2024	17.704	2.15064	-1.6633	-0.865375	1	0	-0.296184	0.147943	14.7943	0	0
Armenia	2018	1	0	-0.130965	-0.197214	0.35059	-0.170583	-0.409369	-0.451067	4.12759	11.1	30.0282	-74.31	11.5522	-1.09866	-39.5685	-3.51	-0.681367	-0.290198	-0.267995	-1.76731	-6.93361e-09	-0.413372	0.901595	-8.52452	5.2	2.14205	63.149	92.4731	18.966	2.78771	-1.19846	-0.608704	1	0	-0.286808	0.150887	15.0887	0	0
Armenia	2019	1	0	0.0547882	-0.177465	0.242604	-0.226046	-0.22704	-0.420025	3.678	10.3	31.2254	-73.7	11.5448	-2.201	-41.7699	-3.52	-1.1944	-0.273265	-0.249911	-1.82336	-4.65712e-09	-0.944488	0.890396	-9.00092	7.6	0.736362	63.219	96.1142	18.304	1.06562	-1.09566	-0.551944	1	0	-0.258054	0.159918	15.9918	0	0
Armenia	2020	0	1	0.0473479	-0.125831	0.238748	-0.304547	-0.00347497	-0.771645	3.68363	8.4	23.4345	-74.13	11.5374	-2.42191	-41.2597	-4.01	-1.11623	-0.299887	-0.274493	-1.90503	-4.36619e-09	-0.84174	0.858174	-9.52302	-7.2	0.463409	63.313	69.4888	18.175	1.80659	-1.17033	-0.593172	0	1	-0.245166	0.163966	16.3966	0	0
Australia	2002	1	0	1.40723	1.76705	1.42116	1.6592	1.76144	1.18941	5.06836	8.7	7.93263	-93.54	17.0991	-2.91247	-4.23451	-5.54	-1.21827	-0.0276628	0	-1.85042	-0.845214	-0.373057	2.32614	-610.64	3.97959	3.70307	84.222	41.4491	6.375	2.84035	3.33353	1.89369	1	0	-0.134589	0.198694	19.8694	0	0
Australia	2003	0	0	1.44213	1.84277	1.57526	1.77328	1.89529	0.878117	4.73472	7.2	8.53031	-93.88	17.0696	-2.46325	-4.0922	-5.57	-1.15449	-0.0261571	0	-1.63063	-0.830559	-0.323933	2.47633	-611.726	3.09076	1.921	84.343	40.2016	5.933	2.98555	3.43398	1.94915	0	0	-0.153665	0.192703	19.2703	0	0
Australia	2004	1	0	1.50154	1.79539	1.71122	1.98494	2.00587	0.935464	4.58899	6.7	8.27552	-94.07	17.0401	-3.14042	-3.94988	-5.45	-1.27451	-0.0245129	0	-1.35222	-0.86047	-0.414044	2.41821	-611.735	4.22428	6.98072	84.463	37.0096	5.399	3.2323	3.67273	2.08099	1	0	-0.156405	0.191842	19.1842	0	0
Australia	2005	0	0	1.50706	1.7128	1.59951	1.74618	1.94267	0.891708	4.49626	6.7	8.9246	-94.22	17.0105	-4.34494	-3.80756	-5.33	-1.85091	-0.0243602	0	-1.286	-0.975028	-0.875884	2.20852	-639.19	3.15417	-3.60693	84.582	39.1607	5.036	3.82548	3.4299	1.9469	0	0	-0.126436	0.201255	20.1255	0	0
Australia	2006	0	0	1.38279	1.75674	1.62376	1.7079	1.95081	0.934467	4.3802	6.8	9.33943	-94.28	16.981	-5.29178	-3.56842	-5.4	-2.29757	-0.0238593	0	-1.281	-0.96622	-1.33135	2.12585	-648.637	2.75535	4.08209	84.7	41.5594	4.785	5.11534	3.41001	1.93592	0	0	-0.098167	0.210133	21.0133	0	0
Australia	2007	1	0	1.3692	1.74389	1.68422	1.81896	2.00087	0.928875	4.4002	7	8.71495	-94.28	16.9515	-6.51438	-3.32929	-5.31	-2.92311	-0.0236637	0	-1.21688	-0.953484	-1.96963	2.06836	-665.034	3.77332	5.19772	84.822	42.008	4.381	4.98605	3.49666	1.98377	1	0	-0.0705721	0.2188	21.88	0	0
Australia	2008	1	0	1.36808	1.75908	1.76602	1.78477	2.02734	0.9547	4.50654	6.8	8.17117	-94.34	16.922	-8.52642	-3.09015	-5.38	-3.02773	-0.0228526	0	-1.03089	-1.20957	-1.81816	1.8796	-650.079	3.58627	4.27702	84.943	42.8468	4.242	4.56978	3.54992	2.01317	1	0	-0.0382438	0.228953	22.8953	0	0
Australia	2009	0	0	1.38379	1.73301	1.81693	1.70196	2.04176	0.855121	3.24797	7.1	7.52291	-95.53	16.8925	-4.96777	-2.85102	-5.28	-1.74841	-0.022486	0	-1.21829	-0.772533	-0.975873	1.97214	-655.849	1.89256	3.11522	85.063	45.7409	5.565	4.94918	3.49648	1.98367	0	0	-0.128272	0.200678	20.0678	0	0
Australia	2010	0	0	1.41977	1.75772	1.69598	1.76339	2.02361	0.88886	3.85665	8.2	8.6155	-94.66	16.8629	-8.0666	-2.67785	-5.17	-2.65581	-0.0220287	0	-1.00311	-0.981468	-1.67434	1.9161	-646.079	2.21998	3.09484	85.182	40.5216	5.214	1.15377	3.49866	1.98487	0	0	-0.0660572	0.220218	22.0218	0	0
Australia	2011	0	0	1.45372	1.73315	1.85212	1.69014	2.03791	0.93571	3.66199	8.3	10.3956	-94.49	16.9553	-8.72352	-2.68598	-5.06	-3.04337	-0.0214754	0	-0.85858	-1.15531	-1.88806	1.86278	-628.341	2.40708	4.68882	85.3	41.8511	5.083	6.20198	3.57278	2.02579	0	0	-0.0516398	0.224746	22.4746	0	0
Australia	2012	1	0	1.49919	1.75978	1.7789	1.61315	1.97751	0.997997	3.7383	8.3	10.5296	-94.44	17.0477	-5.29814	-3.2252	-4.82	-1.93082	-0.0204252	0	-0.801616	-0.771535	-1.15929	2.36411	-614.952	3.91671	3.7202	85.402	43.1643	5.225	1.8057	3.53564	2.00528	1	0	-0.15149	0.193386	19.3386	0	0
Australia	2013	0	0	1.43637	1.7701	1.79122	1.63245	1.77783	1.03107	3.83932	9.2	13.1764	-93.93	17.1401	-5.32012	-3.89187	-4.79	-1.73531	-0.020249	0	-0.799692	-0.627432	-1.10788	2.33377	-603.65	2.60219	3.45393	85.502	41.2729	5.663	-0.163601	3.45813	1.96249	0	0	-0.156002	0.191969	19.1969	0	0
Australia	2014	0	0	1.36167	1.91863	1.85737	1.60089	1.84927	1.03219	3.86036	9.3	14.6271	-93.68	17.2324	-4.76094	-3.75264	-4.64	-1.80382	-0.0205332	0	-0.875508	-0.755451	-1.04837	1.89362	-596.971	2.59528	4.30471	85.602	42.484	6.078	1.4054	3.53982	2.0076	0	0	-0.156234	0.191896	19.1896	0	0
Australia	2015	0	0	1.35573	1.79032	1.77741	1.53325	1.84131	0.873181	4.08655	9.4	13.3421	-93.61	17.3248	-3.23765	-1.87398	-4.53	-1.25204	-0.0206077	0	-0.99285	-0.567566	-0.684472	1.92344	-580.682	2.19017	3.47021	85.701	41.6639	6.055	-0.623858	3.33826	1.8963	0	0	-0.193858	0.18008	18.008	0	0
Australia	2016	0	0	1.3541	1.71667	1.88573	1.53219	1.77225	1.03342	4.07777	9.6	14.596	-93.36	17.4255	-4.08099	-2.15915	-4.4	-1.67601	-0.0195555	0	-1.1735	-0.59141	-1.0846	1.85717	-550.164	2.75939	3.56057	85.8	40.9741	5.711	-0.663158	3.39709	1.92878	0	0	-0.167252	0.188436	18.8436	0	0
Australia	2017	0	0	1.37864	1.64596	1.923	1.49839	1.75297	0.876064	4.35497	9.9	15.6791	-93.14	17.4229	-5.06805	-2.45094	-4.46	-1.78108	-0.0189467	0	-1.12833	-0.760359	-1.02072	1.7731	-550.832	2.27959	3.63609	85.904	42.2037	5.592	3.65318	3.30441	1.87761	0	0	-0.144375	0.195621	19.5621	0	0
Australia	2018	0	0	1.39379	1.67467	1.89658	1.55599	1.76745	0.971185	4.1271	9.8	17.1008	-93.06	17.4213	-5.22752	-2.5061	-4.37	-2.3809	-0.0194696	0	-1.09606	-1.14049	-1.24041	1.6871	-557.338	2.87847	4.25033	86.012	43.7361	5.3	1.86901	3.38369	1.92138	0	0	-0.122803	0.202396	20.2396	0	0
Australia	2019	0	0	1.27037	1.69462	1.86465	1.53869	1.78807	0.917979	3.77469	10.3	19.7039	-92.92	17.4213	-5.74886	-2.14634	-4.36	-2.38984	-0.0198087	0	-1.17129	-1.31733	-1.07251	1.67152	-550.491	2.17155	2.78197	86.124	46.1875	5.159	3.4682	3.29941	1.87485	0	0	-0.105714	0.207763	20.7763	0	0
Australia	2020	0	1	1.29898	1.615	1.81395	1.57335	1.63298	0.862162	3.56771	11.2	22.6003	-92.55	17.4213	-6.09316	-1.7622	-4.44	-3.06892	-0.0199811	-0.149635	-1.22651	-1.11627	-1.80302	1.58867	-527.95	-0.119591	1.35326	86.241	44.6645	6.456	1.8855	3.17902	1.80838	0	1	-0.0748554	0.217455	21.7455	0	0
Austria	2002	0	0	1.3075	1.85791	1.53806	1.88023	1.91516	1.35896	10.7132	24.7	69.9014	-77.36	46.5724	-0.15869	-6.50364	-3.31	-0.088409	-0.0687503	-0.0277082	-0.655873	-0.0603452	-0.00035563	2.72471	-76.9463	1.48437	0.065001	59.655	87.5845	4.852	1.10422	3.62338	2.05373	0	0	-0.171068	0.187237	18.7237	0	0
Austria	2003	0	0	1.34388	1.84792	1.53714	1.93046	1.96387	0.962002	10.6695	22.6	62.137	-78.49	46.6027	-0.151823	-6.48386	-3.46	-0.0941913	-0.0645638	-0.0377213	-0.598064	-0.0563053	-0.000164718	2.7845	-80.3446	1.14157	2.37558	59.375	86.8822	4.779	1.267	3.50862	1.99037	0	0	-0.179497	0.18459	18.459	0	0
Austria	2004	0	0	1.47565	1.81666	1.5141	1.84377	2.02662	1.08965	11.0241	23.2	65.4324	-77.82	46.6331	-0.131901	-6.46409	-3.4	-0.0905375	-0.0555388	-0.0285377	-0.555514	-0.0618287	-0.00017106	2.74532	-73.0657	2.56526	1.06402	59.094	91.4742	5.969	1.72796	3.58361	2.03178	0	0	-0.178453	0.184918	18.4918	0	0
Austria	2005	0	0	1.37866	1.84725	1.60496	1.67953	1.91242	1.10395	12.1132	24.4	64.6807	-77.03	46.6635	-0.146449	-6.44432	-3.44	-0.0957928	-0.0567761	-0.0301518	-0.562362	-0.0642986	-0.00134241	2.66195	-77.637	2.32037	25.8307	58.813	94.6748	5.682	2.53197	3.48299	1.97622	0	0	-0.172749	0.18671	18.671	0	0
Austria	2006	0	0	1.37268	1.89977	1.64441	1.82739	1.90488	1.07445	13.9924	26.6	66.5651	-74.52	46.6938	-0.186311	-6.42455	-3.36	-0.131473	-0.0543977	-0.0426422	-0.539127	-0.0866221	-0.0022089	2.51115	-84.548	3.26934	3.14473	58.532	98.7857	5.32	2.04462	3.57467	2.02684	0	0	-0.163728	0.189543	18.9543	0	0
Austria	2007	1	0	1.36926	1.94183	1.69116	1.86357	2.00335	1.28442	15.538	29	69.6375	-72.38	46.7242	-0.208437	-6.40477	-3.17	-0.137548	-0.0570637	-0.0552657	-0.471886	-0.0785472	-0.00373485	2.44877	-84.8092	3.77522	17.8058	58.249	101.365	4.909	2.25927	3.76183	2.13018	1	0	-0.162395	0.189961	18.9961	0	0
Austria	2008	0	0	1.35846	1.9107	1.60645	1.77166	1.82876	1.33927	16.1582	29.7	70.1078	-71.79	46.7546	-0.258182	-6.385	-3.15	-0.175749	-0.0564751	-0.0583044	-0.435719	-0.113085	-0.00435941	2.43189	-77.7418	1.45331	1.468	57.966	102.744	4.198	1.93379	3.61045	2.0466	0	0	-0.159667	0.190818	19.0818	0	0
Austria	2009	0	1	1.39284	1.77744	1.45002	1.66274	1.69403	1.19087	17.9048	31.3	72.3	-69.81	46.7849	-0.1676	-6.36523	-3.12	-0.118772	-0.0612117	-0.0400329	-0.443024	-0.077623	-0.00111566	2.43473	-74.5492	-3.58626	3.58137	57.683	87.6005	5.371	1.73939	3.32027	1.88637	0	1	-0.156554	0.191796	19.1796	0	0
Austria	2010	0	0	1.43029	1.8012	1.45052	1.81252	1.59612	1.15265	18.3932	31.1	67.7558	-70.15	46.8153	-0.216291	-6.34545	-3.26	-0.134347	-0.0586796	-0.0484574	-0.505448	-0.0812465	-0.00464291	2.41808	-69.0236	1.80898	-5.6454	57.399	99.6449	4.883	0.891339	3.35897	1.90774	0	0	-0.152243	0.19315	19.315	0	0
Austria	2011	0	0	1.40244	1.79896	1.37698	1.60289	1.47029	1.19352	18.9308	31.6	67.5416	-68.84	46.8589	-0.24469	-6.27475	-3.07	-0.156884	-0.053723	-0.047946	-0.470144	-0.102713	-0.00622504	2.50146	-71.6873	2.92747	5.35813	57.115	105.775	4.637	1.81994	3.17939	1.80858	0	0	-0.157395	0.191532	19.1532	0	0
Austria	2012	0	0	1.44877	1.85712	1.51716	1.56019	1.42725	1.34057	19.8439	34.4	76.0603	-66.58	46.9025	-0.238508	-6.20404	-3.04	-0.168682	-0.0516683	-0.0418617	-0.49363	-0.121362	-0.00545832	2.48586	-77.914	0.628246	1.283	57.147	105.841	4.909	2.09166	3.32113	1.88684	0	0	-0.14143	0.196546	19.6546	0	0
Austria	2013	0	1	1.45653	1.83409	1.48221	1.57138	1.53728	1.3641	19.5385	34.6	79.3682	-66.1	46.9461	-0.218675	-6.13333	-3.08	-0.149228	-0.0515732	-0.0404651	-0.492729	-0.102808	-0.00595518	2.47703	-78.2587	-0.250726	-0.302633	57.336	104.985	5.367	1.70872	3.35771	1.90704	0	1	-0.137071	0.197915	19.7915	0	0
Austria	2014	0	0	1.3913	1.93844	1.48217	1.553	1.4665	1.2707	19.7777	35.7	82.5402	-64.82	46.9897	-0.191847	-6.06263	-2.95	-0.135585	-0.0495675	-0.0403134	-0.47144	-0.0920034	-0.00326858	2.49292	-73.2617	0.755799	0.389557	57.526	104.497	5.674	2.00674	3.2978	1.87396	0	0	-0.13764	0.197736	19.7736	0	0
Austria	2015	0	0	1.38369	1.81478	1.39045	1.45098	1.47204	1.12933	19.9576	34.8	78.1279	-65.48	47.0333	-0.134711	-5.99192	-2.99	-0.0923158	-0.0472687	-0.0407159	-0.581431	-0.0499584	-0.00164154	2.47874	-75.4591	1.30352	-1.8041	57.715	103.118	5.802	2.29263	3.08932	1.75884	0	0	-0.140001	0.196994	19.6994	0	0
Austria	2016	0	0	1.33785	1.76146	1.42889	1.47481	1.49688	0.892176	19.8235	34.6	79.2285	-65.65	47.077	-0.111042	-5.92121	-2.96	-0.0677951	-0.042872	-0.0348138	-0.577768	-0.0308945	-0.0020868	2.43897	-75.5783	2.11722	-7.2399	57.905	101.573	6.064	1.81475	2.98378	1.70057	0	0	-0.141426	0.196547	19.6547	0	0
Austria	2017	0	0	1.38622	1.80035	1.42786	1.46775	1.50082	1.02962	19.4621	34	77.0242	-66.46	47.1205	-0.121957	-5.85051	-2.95	-0.077642	-0.0399212	-0.0331756	-0.596177	-0.0417048	-0.00276165	2.49069	-81.7674	2.27225	3.3818	58.094	105.556	5.561	0.975318	3.07951	1.75343	0	0	-0.144596	0.195551	19.5551	0	0
Austria	2018	0	0	1.39955	1.85348	1.52404	1.45612	1.56859	0.88486	18.9418	34.1	78.1654	-66.24	47.164	-0.140755	-5.7798	-2.8	-0.100695	-0.0405378	-0.0450196	-0.548372	-0.0556758	0	2.37319	-86.9829	2.48422	-6.15119	58.297	108.378	4.933	1.81048	3.11809	1.77473	0	0	-0.148076	0.194459	19.4459	0	0
Austria	2019	0	0	1.33716	1.8623	1.44641	1.49213	1.52132	0.892189	18.4608	34	78.1471	-67.22	47.1037	-0.110023	-5.70909	-2.81	-0.0769953	-0.039844	-0.0333158	-0.595751	-0.0436795	0	2.37401	-85.4464	1.75498	-2.85256	58.515	108.207	4.56	1.47369	3.05545	1.74014	0	0	-0.149125	0.194129	19.4129	0	0
Austria	2020	0	1	1.39463	1.77061	1.39523	1.60586	1.47771	0.887601	19.5137	35.8	80.9966	-65.35	47.1379	-0.0708505	-5.70909	-2.84	-0.0420824	-0.0424191	-0.0227696	-0.570601	-0.0193128	0	2.16892	-71.9095	-6.31826	-2.76332	58.748	99.9482	5.201	2.59313	3.04624	1.73506	0	1	-0.141806	0.196428	19.6427	0	0
Azerbaijan	2002	1	0	-0.981288	-0.964197	-0.731832	-0.985209	-1.1955	-1.18536	0.103707	2.4	10.8016	-97.32	12.0588	-25.8803	-122.23	-12.35	-9.47263	-0.47048	0	-8.73239	-9.4726	-2.64131e-05	0	-35.7991	9.43892	32.4655	51.787	92.8181	10.04	4.21439	-3.46851	-1.86214	1	0	0.917155	0.529012	52.9012	1	0
Azerbaijan	2003	1	0	-1.0447	-0.884645	-0.601958	-0.933229	-1.04623	-0.9481	0.197198	2.9	11.5992	-96.95	12.1086	-26.0886	-129.612	-11.79	-9.70317	-0.436779	0	-8.5458	-9.70316	-8.97409e-06	0	-38.6173	10.2083	55.0729	51.988	107.552	9.17	6.96147	-3.21054	-1.7197	1	0	0.896796	0.522618	52.2618	1	0
Azerbaijan	2004	1	0	-1.0567	-0.900518	-0.621019	-0.933773	-1.18083	-1.05981	0.0937613	3.1	12.6702	-97.14	12.1605	-28.7444	-137.708	-11.34	-11.2426	-0.418658	0	-7.6479	-11.2425	-6.3423e-05	0	-38.6257	9.2538	54.3651	52.189	121.507	7.99	9.25197	-3.33616	-1.78907	1	0	0.94198	0.536809	53.6809	1	0
Azerbaijan	2005	1	0	-1.12416	-0.792612	-0.580545	-0.741809	-1.05252	-1.12482	0.186219	3.4	13.1558	-97.12	12.217	-38.5913	-145.41	-9.42	-21.0526	-0.371171	0	-5.95588	-21.0524	-0.000128618	0	-41.5164	27.9615	33.7958	52.389	115.842	7.26	14.7235	-3.18554	-1.7059	1	0	1.36367	0.669247	66.9247	1	0
Azerbaijan	2006	1	0	-1.27916	-0.885929	-0.523376	-0.671189	-1.09591	-1.09268	0.181192	2.9	10.2595	-97.61	12.2752	-41.4703	-149.649	-6.91	-27.4968	-0.29803	0	-4.04813	-27.4966	-0.000217625	0	-43.2821	34.4662	21.3801	52.589	105.262	6.62	11.3292	-3.24129	-1.73668	1	0	1.50847	0.714725	71.4725	1	0
Azerbaijan	2007	1	0	-1.2334	-0.88002	-0.466509	-0.802226	-1.12907	-0.625996	0.702227	3.8	10.8218	-97.84	12.3312	-39.1424	-148.922	-5.23	-30.1218	-0.238662	0	-2.52147	-30.1213	-0.000420666	0	-43.7368	25.4632	13.9011	52.79	96.6418	6.33	20.5825	-3.0642	-1.6389	1	0	1.46969	0.702545	70.2545	1	0
Azerbaijan	2008	1	0	-1.32513	-0.83616	-0.367752	-0.785877	-1.15665	-0.33035	0.614385	3.1	10.3143	-98.37	12.3863	-43.0407	-142.083	-5.24	-32.0142	-0.215354	0	-1.86441	-32.0136	-0.000598987	0	-48.2692	10.5914	8.16111	52.99	89.2429	5.86	27.971	-2.91501	-1.55652	1	0	1.58814	0.739745	73.9745	1	0
Azerbaijan	2009	1	0	-1.25977	-0.879176	-0.316739	-0.664515	-1.19408	-0.277854	0.588453	3.3	12.2463	-98	12.4418	-29.6393	-137.277	-4.29	-22.1228	-0.205248	0	-1.71675	-22.113	-0.00975741	0	-42.6443	9.3695	6.54746	53.19	74.744	5.74	-18.8992	-2.81794	-1.50292	1	0	0.935146	0.534662	53.4662	1	0
Azerbaijan	2010	1	0	-1.3046	-0.891145	-0.392555	-0.813017	-1.24537	-0.238547	0.761937	4.4	18.4243	-96.99	12.4915	-27.8845	-135.182	-3.89	-20.6975	-0.22973	0	-1.39671	-20.63	-0.0674684	0	-41.5909	4.78883	6.33726	53.406	74.986	5.63	13.8277	-2.95273	-1.57735	1	0	0.830801	0.501891	50.1891	1	0
Azerbaijan	2011	0	1	-1.30185	-0.938726	-0.386365	-0.772404	-1.19531	-0.532136	0.754248	3.5	13.1862	-97.9	12.601	-32.8786	-139.199	-4.2	-23.6027	-0.224176	0	-1.32441	-23.5294	-0.0732935	0	-43.9947	-1.573	6.8005	53.637	80.508	5.42	24.607	-3.05576	-1.63424	0	1	1.0254	0.563008	56.3008	1	0
Azerbaijan	2012	0	0	-1.29948	-0.879533	-0.488717	-0.790763	-1.14269	-0.715752	0.706489	2.8	7.92239	-98.5	12.7108	-29.012	-147.566	-4.47	-20.1642	-0.218475	0	-1.42308	-20.1044	-0.0597688	0	-47.082	2.20294	7.59652	53.883	78.2631	5.19	2.84498	-3.14338	-1.68262	0	0	0.819648	0.498388	49.8388	1	0
Azerbaijan	2013	1	0	-1.40289	-0.756261	-0.425341	-0.452178	-0.970755	-0.41286	1.07575	2.5	6.96412	-98.24	12.8205	-25.5324	-147.8	-4.28	-19.448	-0.201584	0	-1.41913	-19.4089	-0.0391237	0	-48.3295	5.84342	3.53212	54.145	74.6758	4.97	0.413164	-2.74947	-1.46511	1	0	0.731377	0.470665	47.0665	1	0
Azerbaijan	2014	0	0	-1.47933	-0.697012	-0.268494	-0.31359	-1.02283	-0.55991	1.05291	2.1	5.98006	-98.39	12.9297	-22.5181	-142.847	-4.3	-15.0017	-0.186029	0	-1.48527	-14.9649	-0.0367831	0.0663909	-50.1329	2.79759	5.88846	54.422	69.4832	4.91	-1.3302	-2.70119	-1.43846	0	0	0.503362	0.399053	39.9053	0	0
Azerbaijan	2015	0	0	-1.55243	-0.716545	-0.3708	-0.258792	-0.952573	-0.733917	1.06158	2.3	7.40635	-98.06	13.0395	-14.444	-144.042	-4.26	-9.30862	-0.190131	0	-2.15023	-9.25342	-0.0551998	0.146653	-49.9965	1.04955	7.62607	54.714	72.6015	4.96	-8.80962	-2.8136	-1.50052	0	0	0.166032	0.293109	29.3109	0	0
Azerbaijan	2016	0	1	-1.56092	-0.539356	-0.395616	-0.159376	-0.852637	-0.808909	0.697001	1.9	8.78411	-98.69	13.1544	-14.7854	-146.371	-4.35	-9.9105	-0.20092	0	-3.25295	-9.82405	-0.0864457	0.253636	-49.7623	-3.0636	11.8828	55.021	90.0773	5	14.6283	-2.6955	-1.43531	0	1	0.240255	0.31642	31.642	0	0
Azerbaijan	2017	0	0	-1.56365	-0.584922	-0.37242	-0.171381	-0.906533	-0.751901	0.703655	1.9	8.125	-98.92	13.2731	-19.6747	-149.353	-4.38	-12.6483	-0.198489	0	-3.04128	-12.4048	-0.243528	0.190993	-49.5226	0.153615	7.0167	55.343	90.4023	5	16.2262	-2.70925	-1.44291	0	0	0.415548	0.371474	37.1474	0	0
Azerbaijan	2018	0	0	-1.50814	-0.619801	-0.314388	-0.145131	-0.853234	-0.711399	0.757443	1.9	8.13429	-98.9	13.4139	-27.6209	-149.932	-4.34	-17.6246	-0.196814	0	-2.85891	-17.4995	-0.125148	0.141746	-50.235	1.5004	2.97798	55.68	91.6726	4.9	12.1844	-2.62004	-1.39365	0	0	0.739112	0.473095	47.3095	1	0
Azerbaijan	2019	0	0	-1.5286	-0.610428	-0.223896	-0.128163	-0.849682	-0.693411	0.729455	1.7	7.32702	-99.08	13.5534	-23.4349	-155.145	-4.62	-14.6688	-0.187782	0	-3.12631	-14.5273	-0.141528	0.14519	-53.0143	2.47981	3.12183	56.031	85.8181	5	-0.221653	-2.56348	-1.36242	0	0	0.565215	0.418479	41.8479	0	0
Azerbaijan	2020	0	1	-1.54087	-0.729643	-0.33604	-0.155264	-1.07808	-0.852254	0.699688	1.3	5.46925	-99.19	13.6942	-13.0027	-150.377	-4.7	-7.56521	-0.178932	0	-3.44338	-7.39146	-0.173756	0.144476	-51.3585	-4.19896	1.1879	56.397	72.0179	7.24	-7.49363	-2.8527	-1.52211	0	1	0.126128	0.280577	28.0577	0	0
Bangladesh	2002	1	0	-0.432221	-0.991601	-1.05544	-0.726736	-1.44909	-1.03259	38.4327	54.4	6.56882	-61.25	14.7033	-1.15632	-34.1619	-2.52	-0.73715	-2.10068	-0.180091	-0.971375	-0.557059	0	0.0731195	-156.667	3.83312	0.0955794	24.756	28.9674	3.966	3.89287	-3.31683	-1.77839	1	0	-0.264311	0.157953	15.7953	0	0
Bangladesh	2003	1	0	-0.551807	-1.15194	-1.04475	-0.838939	-1.54172	-1.11558	37.2097	52.6	5.71794	-62.48	14.6787	-1.17267	-34.1619	-2.53	-0.700935	-1.97805	-0.186248	-0.961264	-0.514687	0	0.0843477	-159.819	4.73957	0.445961	25.429	27.6579	4.32	5.81582	-3.56202	-1.91378	1	0	-0.269484	0.156328	15.6328	0	0
Bangladesh	2004	1	0	-0.672146	-1.12248	-1.17591	-0.932883	-1.59711	-1.36048	36.9425	52	4.32615	-62.76	14.6542	-1.25033	-34.1619	-2.45	-0.762645	-1.85619	-0.172704	-0.991626	-0.589941	0	0.0653284	-160.751	5.23953	0.689472	26.114	26.8582	4.314	4.56214	-3.83757	-2.06593	1	0	-0.268399	0.156669	15.6669	0	0
Bangladesh	2005	1	0	-0.569969	-0.978552	-1.08175	-0.918954	-1.40647	-1.86384	35.6688	50.6	3.76711	-64.04	14.6296	-1.42151	-34.1619	-2.42	-0.871723	-1.73845	-0.1588	-1.04941	-0.712923	0	0.0610433	-166.384	6.53594	1.17065	26.809	34.3969	4.25	4.58636	-3.80945	-2.05039	1	0	-0.263106	0.158331	15.8331	0	0
Bangladesh	2006	1	0	-0.451237	-0.907564	-1.00554	-0.838699	-1.44298	-1.5071	33.7909	48.6	3.2266	-65.94	14.605	-1.62191	-34.1619	-2.41	-1.07739	-1.61082	-0.209621	-1.16041	-0.867766	0	0.0681681	-171.509	6.6719	0.635864	27.517	38.1119	3.591	5.87594	-3.51327	-1.88686	1	0	-0.251847	0.161867	16.1867	0	0
Bangladesh	2007	1	0	-0.5735	-0.827156	-0.953168	-0.707533	-1.06324	-1.54307	32.633	47.2	2.44931	-67.11	14.5805	-1.28015	-34.1619	-2.36	-0.920731	-1.50275	-0.310121	-1.15483	-0.610609	0	0.0806839	-176.337	7.0586	0.817757	28.237	39.9424	4.017	6.47126	-3.30466	-1.77167	1	0	-0.26826	0.156713	15.6713	0	0
Bangladesh	2008	1	0	-0.442117	-0.752374	-0.914518	-0.738396	-1.04679	-1.50833	31.381	45.2	2.17016	-68.29	14.5559	-1.24591	-34.1619	-2.33	-0.881301	-1.39939	-0.243506	-1.13079	-0.637796	0	0.0662497	-186.876	6.01379	1.44966	28.968	42.6209	4.492	7.86097	-3.18519	-1.70571	1	0	-0.276142	0.154237	15.4237	0	0
Bangladesh	2009	1	0	-0.289043	-0.784571	-0.866343	-0.802756	-1.07525	-1.54677	29.982	43.1	1.7126	-69.88	14.5313	-1.19268	-34.1619	-2.33	-0.843649	-1.34028	-0.210047	-1.11741	-0.633601	0	0.0547604	-192.128	5.04512	0.879517	29.709	40.0928	5	6.76435	-3.16433	-1.69419	1	0	-0.284152	0.151721	15.1721	0	0
Bangladesh	2010	1	0	-0.268091	-0.801013	-0.857593	-0.75369	-1.05408	-1.42579	28.6178	40.3	2.19929	-71.15	14.5067	-1.41591	-34.1619	-2.32	-1.04927	-1.2784	-0.341809	-1.15994	-0.707459	0	0.0516589	-200.503	5.57179	1.06897	30.462	37.8028	3.379	7.14466	-3.07543	-1.6451	1	0	-0.274126	0.15487	15.487	0	0
Bangladesh	2011	1	0	-0.315069	-0.733336	-0.817079	-0.772121	-1.09739	-1.40474	27.6763	38.4	2.26185	-72.03	14.4991	-1.58943	-34.1619	-2.25	-1.16909	-1.20017	-0.324659	-1.1693	-0.844433	0	0.0525426	-205.453	6.46438	0.983399	31.225	47.4208	3.736	7.85945	-3.06345	-1.63848	1	0	-0.271474	0.155703	15.5703	0	0
Bangladesh	2012	1	0	-0.401941	-0.936167	-0.959473	-0.807726	-0.856619	-1.37909	26.3897	37.3	2.14636	-73.35	14.4916	-1.55457	-34.1619	-2.21	-1.19114	-1.11586	-0.266315	-1.24567	-0.924824	0	0.0558946	-210.381	6.52146	1.1885	31.993	48.1109	4.071	8.16457	-3.16943	-1.697	1	0	-0.272565	0.155361	15.5361	0	0
Bangladesh	2013	1	0	-0.405487	-0.87158	-0.923937	-0.797781	-0.893966	-1.62786	24.8072	37	1.83888	-74.91	14.484	-1.15168	-34.1619	-2.22	-0.90656	-1.03555	-0.192265	-1.2088	-0.714295	0	0.0534898	-213.243	6.01361	1.73532	32.762	46.2964	4.426	7.17495	-3.2414	-1.73674	1	0	-0.294923	0.148339	14.8339	0	0
Bangladesh	2014	1	0	-0.474045	-0.782357	-0.95516	-0.775071	-0.892609	-0.895563	23.9014	35.4	1.5059	-75.34	14.4764	-1.04718	-34.1619	-2.16	-0.847423	-0.967338	-0.180661	-1.16547	-0.666763	0	0.0646066	-219.953	6.06106	1.4687	33.535	44.5141	4.416	5.66879	-2.92471	-1.56188	1	0	-0.305472	0.145026	14.5025	0	0
Bangladesh	2015	1	0	-0.512202	-0.769605	-0.92024	-0.75201	-0.844677	-1.20977	22.1723	33.1	1.81923	-76.86	14.4688	-0.899814	-34.1619	-2.17	-0.761525	-0.901436	-0.196703	-1.20835	-0.564822	0	0.0671856	-228.939	6.55264	1.45078	34.308	42.086	4.396	5.87278	-3.02243	-1.61583	1	0	-0.313551	0.142488	14.2488	0	0
Bangladesh	2016	1	0	-0.584256	-0.669501	-0.811328	-0.705848	-0.887519	-1.25973	20.1667	30.2	1.82171	-78.77	14.4688	-0.716141	-34.1619	-2.2	-0.625475	-0.852057	-0.172691	-0.961995	-0.452784	0	0.0509293	-235.993	7.11348	0.879528	35.083	31.3342	4.35	27.8507	-2.97415	-1.58918	1	0	-0.33717	0.13507	13.507	0	0
Bangladesh	2017	1	0	-0.615439	-0.67966	-0.824757	-0.752013	-0.858603	-1.25363	19.3752	28.1	1.84508	-79.41	14.4688	-0.71042	-34.1619	-2.12	-0.624478	-0.792205	-0.132524	-0.976868	-0.491955	0	0.0858706	-247.945	6.59025	0.616342	35.858	29.9997	4.372	5.0476	-3.00569	-1.60659	1	0	-0.342764	0.133313	13.3313	0	0
Bangladesh	2018	1	0	-0.742033	-0.649217	-0.849187	-0.762284	-0.926823	-0.985569	19.0376	27	1.5825	-79.7	14.4688	-0.649239	-34.1619	-1.96	-0.575875	-0.735478	-0.0679212	-0.978206	-0.507953	0	0.0426902	-252.938	7.31941	0.753549	36.632	32.5146	4.407	5.80554	-2.97976	-1.59227	1	0	-0.352724	0.130185	13.0185	0	0
Bangladesh	2019	1	0	-0.741863	-0.643475	-0.937222	-0.75354	-1.01721	-0.928629	17.5762	26.1	1.41533	-80.91	14.4688	-0.637718	-34.1619	-1.95	-0.573819	-0.685364	-0.0686746	-1.01204	-0.505144	0	0.031544	-256.221	7.88192	0.543244	37.405	31.5781	4.441	3.65814	-3.02988	-1.61995	1	0	-0.354995	0.129472	12.9472	0	0
Bangladesh	2020	1	0	-0.769459	-0.565531	-0.906214	-0.779491	-1.00371	-0.915817	17.3262	27.2	1.46813	-81.15	14.4688	-0.560868	-34.1619	-1.9	-0.504155	-0.663393	-0.0769426	-1.01803	-0.427213	0	0.0105946	-251.934	3.44802	0.40786	38.177	26.2714	5.436	3.84106	-2.99261	-1.59937	1	0	-0.35949	0.12806	12.806	0	0
Belgium	2002	0	0	1.37745	1.34494	1.25418	1.91511	1.4578	1.2608	2.07932	1.7	2.76353	-74.55	22.148	-0.0236396	-56.1308	-5.13	-0.023238	-0.0763552	-0.023238	-0.849893	0	0	1.9444	-141.361	1.70689	7.01242	97.241	136.085	6.91	1.64	3.06819	1.74718	0	0	-0.328993	0.137638	13.7638	0	0
Belgium	2003	0	0	1.47829	1.3311	1.28163	1.86879	1.37511	0.858238	2.41834	1.9	2.67163	-75.37	22.2224	-0.0216928	-55.1597	-5.3	-0.0212863	-0.0761061	-0.0212863	-0.74871	0	0	1.99584	-145.155	1.03796	10.8649	97.296	132.716	7.68	1.85012	2.8941	1.65105	0	0	-0.326332	0.138474	13.8474	0	0
Belgium	2004	1	0	1.44027	1.31123	1.34642	1.85431	1.36038	0.709137	2.54785	2	3.30853	-74.97	22.2968	-0.0158637	-54.1886	-5.14	-0.0156464	-0.0709384	-0.0156464	-0.671996	0	0	2.1197	-144.314	3.57121	12.0521	97.35	136.918	7.363	1.91499	2.82389	1.61229	1	0	-0.33407	0.136044	13.6044	0	0
Belgium	2005	0	0	1.42076	1.25764	1.27136	1.70651	1.37716	0.793774	2.78442	2.5	3.99451	-74.64	22.3712	-0.0157284	-53.2175	-5	-0.0155229	-0.0747256	-0.0154776	-0.658965	-4.52763e-05	0	2.07775	-141.218	2.32174	8.72718	97.403	144.529	8.44	2.08307	2.73003	1.56046	0	0	-0.336284	0.135349	13.5349	0	0
Belgium	2006	0	0	1.34239	1.2246	1.32994	1.74316	1.30129	0.856376	3.30877	2.9	4.99039	-73.67	22.4456	-0.0192821	-52.5004	-4.81	-0.0187021	-0.0688308	-0.0174954	-0.643398	-0.00120666	0	1.85232	-137.741	2.55234	14.4079	97.454	149.568	8.246	2.26472	2.72067	1.55529	0	0	-0.337524	0.134959	13.4959	0	0
Belgium	2007	1	0	1.36077	1.31539	1.42054	1.60234	1.34742	0.757325	3.79645	3.4	5.42543	-72.47	22.52	-0.0190731	-51.7833	-4.55	-0.0188114	-0.0693773	-0.0188114	-0.564123	0	0	1.80197	-135.318	3.67692	20.5027	97.505	152.468	7.459	1.93168	2.7277	1.55917	1	0	-0.345997	0.132298	13.2298	0	0
Belgium	2008	0	0	1.32499	1.33521	1.40567	1.38118	1.36264	0.620571	4.24689	4	6.82942	-73.26	22.5944	-0.0183626	-51.075	-4.67	-0.0179266	-0.0683022	-0.0179266	-0.541555	0	0	1.76866	-137.21	0.446905	36.8029	97.555	161.088	6.976	1.90887	2.56107	1.46716	0	0	-0.339353	0.134385	13.4385	0	0
Belgium	2009	0	1	1.34669	1.37715	1.31022	1.56746	1.45201	0.820825	5.12539	4.9	7.53212	-72.61	22.6688	-0.0173168	-50.0167	-4.58	-0.0170007	-0.0720821	-0.0170007	-0.559205	0	0	1.84036	-129.927	-1.90644	15.9489	97.603	135.138	7.908	0.781821	2.74925	1.57107	0	1	-0.338255	0.13473	13.473	0	0
Belgium	2010	0	0	1.36069	1.41785	1.28282	1.65421	1.47383	0.810646	5.75574	6.2	8.4443	-72.68	22.7432	-0.0469717	-49.6083	-4.79	-0.0398099	-0.071435	-0.0189943	-0.623938	-0.0208156	0	1.93584	-139.164	2.71031	26.0596	97.651	150.163	8.293	1.7031	2.8043	1.60147	0	0	-0.323472	0.139372	13.9372	0	0
Belgium	2011	0	0	1.32516	1.43485	1.23622	1.72348	1.51993	0.954535	6.02122	6.7	10.5547	-70.21	22.7395	-0.0658456	-42.35	-4.39	-0.052899	-0.0686808	-0.0175188	-0.549031	-0.0353802	0	2.00578	-128.876	1.93116	31.0367	97.698	160.766	7.14	2.29252	2.88472	1.64587	0	0	-0.327722	0.138038	13.8038	0	0
Belgium	2012	0	0	1.34942	1.44881	1.22217	1.67117	1.55911	0.9236	6.71271	7.7	14.2378	-70.83	22.7357	-0.0633726	-44.1667	-4.17	-0.0490222	-0.0641015	-0.0149345	-0.583069	-0.0340877	0	1.99366	-127.022	0.215804	2.36957	97.744	160.383	7.542	2.20574	2.87436	1.64015	0	0	-0.331411	0.136879	13.6879	0	0
Belgium	2013	0	0	1.37299	1.45677	1.28375	1.70195	1.60432	0.940083	6.53588	8.3	15.6358	-70.58	22.7319	-0.0591221	-40.2417	-4.33	-0.0446457	-0.0588255	-0.0141359	-0.583996	-0.0305098	0	1.99657	-127.79	0.305495	-5.65562	97.789	157.574	8.425	1.41249	2.95868	1.68671	0	0	-0.31927	0.140692	14.0692	0	0
Belgium	2014	0	0	1.3663	1.54852	1.15289	1.51735	1.51272	0.701269	6.45169	9.1	18.4604	-72.25	22.7282	-0.0681066	-37.9667	-4.02	-0.0500773	-0.0530969	-0.0128937	-0.555241	-0.0371836	0	1.98738	-121.004	1.76554	-2.82644	97.833	158.572	8.523	0.840396	2.70892	1.5488	0	0	-0.326774	0.138335	13.8335	0	0
Belgium	2015	0	0	1.38755	1.45623	1.27396	1.52945	1.47445	0.577092	6.77766	9.4	22.3213	-74.92	22.7244	-0.0352518	-33.2833	-3.93	-0.0232552	-0.0502676	-0.0110375	-0.7055	-0.0122176	0	2.02919	-125.777	1.47416	-4.23261	97.876	155.069	8.482	1.12184	2.67352	1.52925	0	0	-0.318628	0.140894	14.0894	0	0
Belgium	2016	0	0	1.37725	1.3938	1.32857	1.39764	1.53124	0.429606	6.82041	9.2	17.9645	-69.91	22.7244	-0.030378	-34.942	-4.11	-0.019606	-0.0472089	-0.0106821	-0.703991	-0.00892386	0	2.14527	-124.876	1.1935	12.1319	97.919	159.058	7.83	1.89529	2.56884	1.47145	0	0	-0.315121	0.141995	14.1995	0	0
Belgium	2017	0	0	1.33864	1.32063	1.23355	1.24078	1.40419	0.417607	6.86845	9.7	19.5544	-70.2	22.7244	-0.0371502	-36.6007	-4.02	-0.0253237	-0.0474833	-0.00945014	-0.683779	-0.0158735	0	2.36365	-122.979	1.47447	-7.44424	97.961	166.904	7.09	1.98316	2.34278	1.34663	0	0	-0.320826	0.140204	14.0204	0	0
Belgium	2018	0	0	1.33044	1.33859	1.25904	1.22463	1.42957	0.393769	7.04462	10.7	24.2594	-73.75	22.6052	-0.0484488	-34.7917	-3.8	-0.0333638	-0.0466341	-0.010617	-0.669482	-0.0227468	0	2.38841	-123.465	1.87797	-7.6665	98.001	168.278	5.941	1.71728	2.35282	1.35218	0	0	-0.32472	0.13898	13.898	0	0
Belgium	2019	0	0	1.30838	1.33616	1.27654	1.11332	1.4488	0.458395	6.68845	10.2	21.7446	-70.21	22.6044	-0.0422428	-34.9917	-3.83	-0.0292646	-0.0465487	-0.0083172	-0.701062	-0.0209474	0	2.25083	-123.128	2.44289	-1.97253	98.041	165.465	5.364	1.85424	2.33555	1.34264	0	0	-0.3217	0.139929	13.9929	0	0
Belgium	2020	0	1	1.27814	1.32759	1.34364	1.07824	1.4458	0.521079	7.58609	12.3	27.4037	-71	22.6044	-0.0284876	-35.1917	-3.71	-0.0188316	-0.0480674	-0.0075526	-0.68412	-0.011279	0	2.09961	-115.379	-4.79298	-5.74235	98.079	156.95	5.545	1.59612	2.36084	1.3566	0	1	-0.318109	0.141057	14.1057	0	0
Bolivia	2002	0	0	0.14037	-0.378113	-0.0900736	-0.327786	-0.940808	-0.286516	16.4696	28.1	53.0239	-79.44	50.4923	-4.94485	-0.658449	-4.08	-2.50485	-1.00619	0	-2.17209	-2.2805	-0.224352	2.34295	-69.7716	2.48557	8.55789	62.783	49.3503	2.613	2.82076	-1.59702	-0.828775	0	0	0.0872375	0.268363	26.8362	0	0
Bolivia	2003	0	0	-0.0564173	-0.469469	-0.152667	-0.38333	-0.853619	-0.834885	16.2278	27	46.0596	-80.17	50.3063	-5.31628	-0.663415	-4.07	-2.79472	-0.956046	0	-2.45224	-2.62393	-0.170794	1.78845	-70.7199	2.71134	2.44234	63.248	51.9678	2.664	6.32999	-1.98017	-1.04034	0	0	0.112863	0.276411	27.6411	0	0
Bolivia	2004	1	0	-0.17045	-0.626745	-0.265374	-0.644271	-0.809159	-0.680571	16.3352	25.8	48.4595	-79.83	50.1202	-7.42998	-0.668381	-3.97	-4.47428	-0.888439	0	-2.49588	-4.06908	-0.405194	1.68719	-72.0845	4.1733	0.745773	63.711	57.4643	2.622	7.96771	-2.19185	-1.15722	1	0	0.212331	0.30765	30.765	0	0
Bolivia	2005	1	0	-0.15671	-0.765425	-0.693852	-0.699575	-0.741979	-0.97103	15.0914	24.6	41.0263	-81.73	49.9342	-11.5452	-0.673346	-4.19	-7.10835	-0.810696	0	-2.54914	-6.42586	-0.682492	2.47967	-72.6481	4.42143	-2.49887	64.17	67.6419	2.603	5.9408	-2.58071	-1.37193	1	0	0.371143	0.357528	35.7528	0	0
Bolivia	2006	1	0	0.0764636	-0.853729	-0.888416	-0.732253	-0.431124	-0.802563	15.3074	23.7	43.9773	-81.26	49.7481	-14.6335	-0.678312	-4.07	-9.16633	-0.72351	0	-2.49128	-6.34498	-2.82135	2.21126	-73.6925	4.79701	2.45169	64.628	74.5378	2.577	13.6637	-2.42578	-1.28639	1	0	0.46283	0.386324	38.6324	0	0
Bolivia	2007	1	0	0.042224	-0.832326	-0.986018	-0.574793	-0.402194	-0.852071	15.4883	22.1	43.9196	-80.9	49.5621	-13.9849	-0.683278	-3.98	-8.33766	-0.674824	0	-2.46303	-4.88106	-3.45659	2.30748	-78.3849	4.56438	2.79185	65.082	76.0619	2.616	7.37335	-2.41759	-1.28186	1	0	0.399157	0.366326	36.6326	0	0
Bolivia	2008	1	0	0.00296171	-0.978549	-0.864422	-0.629992	-0.528392	-0.696566	15.7939	21.3	40.545	-80.68	49.3761	-12.7767	-0.687974	-3.82	-7.22107	-0.61214	0	-2.18022	-4.64698	-2.57409	2.11502	-72.3073	6.1485	3.07261	65.535	82.867	2.603	10.3812	-2.45198	-1.30086	1	0	0.331238	0.344995	34.4995	0	0
Bolivia	2009	1	0	0.00694658	-1.11392	-0.873412	-0.604385	-0.631417	-0.50611	15.7456	20.6	38.786	-80.89	49.19	-7.44852	-0.687974	-3.85	-3.67483	-0.57858	0	-2.31994	-2.40245	-1.27238	1.86085	-73.7073	3.357	2.43968	65.984	68.6271	2.973	-2.41989	-2.46549	-1.30831	1	0	0.132143	0.282466	28.2466	0	0
Bolivia	2010	1	0	-0.0392411	-1.02979	-0.797301	-0.500351	-0.458649	-0.415407	15.1032	19.9	34.3751	-81.95	49.004	-9.16161	-0.691804	-4.01	-5.17973	-0.544702	0	-2.31085	-2.6529	-2.52683	1.62367	-77.0636	4.12672	3.16543	66.43	75.5116	2.608	8.77751	-2.25342	-1.19121	1	0	0.198423	0.303282	30.3282	0	0
Bolivia	2011	1	0	-0.0682378	-0.984036	-0.763345	-0.469425	-0.573696	-0.417127	13.8245	18.1	34.739	-83.22	48.8085	-14.0011	-0.695635	-4.09	-8.19111	-0.513669	0	-2.15626	-4.25946	-3.93165	1.49452	-77.8365	5.20409	3.58442	66.874	82.4804	2.255	14.6024	-2.26355	-1.19681	1	0	0.364967	0.355588	35.5588	0	0
Bolivia	2012	1	0	-0.0815853	-1.01876	-0.832378	-0.359968	-0.727892	-0.458068	12.8798	17.4	33.3301	-84.39	48.613	-12.3531	-0.699466	-4.22	-9.57865	-0.49597	0	-2.12624	-7.05618	-2.52247	1.3351	-79.5848	5.12228	3.91355	67.315	84.9488	2.066	7.10028	-2.35112	-1.24516	1	0	0.42806	0.375404	37.5404	0	0
Bolivia	2013	1	0	-0.069048	-1.05095	-0.786389	-0.378559	-0.587969	-0.328593	12.8719	16	34.1409	-84.21	48.4176	-11.9599	-0.703297	-3.99	-9.56004	-0.47662	0	-2.10694	-7.52166	-2.03838	1.3452	-81.3876	6.79601	5.70662	67.699	81.2309	2.437	5.99539	-2.23244	-1.17963	1	0	0.420696	0.373091	37.3091	0	0
Bolivia	2014	1	0	-0.0263674	-1.05834	-0.886674	-0.581927	-0.628803	-0.333112	11.827	15	29.0683	-85.81	48.2221	-10.5329	-0.707128	-4.16	-8.35762	-0.444054	0	-2.19572	-6.61485	-1.74277	1.31935	-82.4143	5.46057	1.98982	68.047	85.2645	2.021	2.0495	-2.37708	-1.2595	1	0	0.354619	0.352338	35.2338	0	0
Bolivia	2015	1	0	-0.00476542	-1.16212	-0.919425	-0.67691	-0.717875	-0.270499	11.9115	14.2	29.4513	-85.5	48.0266	-4.11808	-0.710958	-3.98	-2.96635	-0.427603	0	-2.26487	-2.84414	-0.122204	1.35861	-83.378	4.85719	1.68073	68.393	67.9328	3.111	-4.6206	-2.48349	-1.31825	1	0	0.0556583	0.258445	25.8445	0	0
Bolivia	2016	1	0	-0.0366767	-1.23874	-1.01973	-0.600445	-0.774886	-0.253676	11.4628	13.6	20.808	-86.8	47.7713	-2.97275	-0.714789	-4.03	-1.92859	-0.418891	0	-2.37217	-1.36644	-0.562143	1.4708	-85.127	4.26392	0.98808	68.738	56.401	3.498	-1.35487	-2.56372	-1.36255	1	0	-0.0209761	0.234376	23.4376	0	0
Bolivia	2017	1	0	-0.0248409	-1.24511	-0.995769	-0.395565	-0.701331	-0.280111	11.1274	14.3	25.1947	-86.7	47.5327	-5.01457	-0.71862	-4.03	-3.53621	-0.425794	0	-2.33863	-1.69524	-1.84098	1.27709	-85.7626	4.19521	1.89949	69.08	56.7047	3.655	6.0614	-2.4374	-1.2928	1	0	0.0581248	0.259219	25.9219	0	0
Bolivia	2018	1	0	-0.059667	-1.2119	-1.00711	-0.329585	-0.688641	-0.286621	11.1008	14.3	29.7072	-86.3	47.3121	-5.37167	-0.722451	-3.94	-3.82445	-0.423535	0	-2.31513	-2.88777	-0.936684	1.18781	-86.4142	4.22362	0.750525	69.425	57.11	3.519	3.05627	-2.41137	-1.27843	1	0	0.0939644	0.270475	27.0475	0	0
Bolivia	2019	0	0	-0.117428	-1.18942	-1.00196	-0.790566	-0.781366	-0.72834	11.4082	13.5	36.3314	-85.34	47.1095	-4.09529	-0.726282	-3.87	-2.75843	-0.429554	0	-2.27412	-2.31226	-0.446167	0.932325	-87.3187	2.21671	-0.529735	69.773	56.3973	3.682	-0.693003	-2.86009	-1.5262	0	0	0.0435568	0.254644	25.4644	0	0
Bolivia	2020	0	1	-0.0864524	-1.21863	-1.03529	-0.726455	-0.844825	-0.453467	14.0503	16.9	35.9092	-82.26	46.9249	-2.72038	-0.727889	-3.55	-1.55214	-0.462673	0	-2.37589	-1.21484	-0.337293	0.989035	-84.1521	-8.73788	-3.08352	70.123	45.5033	7.903	-1.85439	-2.75594	-1.46869	0	1	-0.0262957	0.232706	23.2706	0	0
Botswana	2002	1	0	0.666893	0.55902	0.900156	0.536757	0.624538	0.873264	28.8096	36.1	0	-65.37	30.6744	-0.91412	-8.10758	-3.59	-0.860117	-0.797971	-0.428169	-1.71317	-0.130863	-0.301085	0.778493	-6.7299	6.06953	7.50152	54.57	91.8358	21.268	1.18737	1.08539	0.652351	1	0	-0.153912	0.192625	19.2625	0	0
Botswana	2003	1	0	0.706077	0.670592	0.844509	0.619481	1.24492	1.10494	28.3213	36.2	0	-64.14	30.4657	-1.93145	-8.1197	-3.39	-1.68146	-0.739202	-0.437885	-1.21207	-0.0899898	-1.15359	0.778493	-6.4996	4.62589	5.56528	55.029	85.834	23.8	3.25908	1.51915	0.891857	1	0	-0.146403	0.194984	19.4984	0	0
Botswana	2004	0	0	0.73587	0.562501	0.763185	0.598915	0.875726	0.916689	30.4532	34.3	0	-61.07	30.2569	-3.22397	-8.13182	-3.44	-2.76732	-0.723111	-0.307268	-1.09514	-0.259497	-2.20056	0.778493	-6.4421	2.70582	4.36384	55.488	90.9978	21.758	10.0788	1.20112	0.716251	0	0	-0.102051	0.208913	20.8913	0	0
Botswana	2005	1	0	0.594608	0.541109	0.720575	0.581383	1.16079	1.06357	29.7216	33	0	-62.14	30.0482	-2.34343	-8.14394	-3.39	-2.0069	-0.685159	-0.295399	-1.09616	-0.195819	-1.51568	0.453426	-7.0989	4.55665	4.24295	55.944	88.5054	19.847	15.4717	1.27978	0.759683	1	0	-0.136753	0.198015	19.8014	0	0
Botswana	2006	1	0	0.5131	0.513664	0.610028	0.421108	0.936531	1.01711	29.5413	31.8	0	-61.88	29.8394	-6.44215	-8.15606	-3.26	-5.24533	-0.637293	-0.301609	-1.07114	-0.202372	-4.74135	0.463615	-6.9086	8.36387	4.90881	56.4	86.6124	17.782	5.1544	0.990758	0.600098	1	0	-0.0065831	0.238897	23.8897	0	0
Botswana	2007	1	0	0.507904	0.544856	0.633248	0.53325	0.993911	1.05614	28.9602	29	0	-61.4	29.6307	-7.41242	-8.16818	-3.18	-5.50128	-0.591469	-0.375146	-1.09063	-0.227065	-4.89906	0.423717	-7.1418	5.79256	4.68081	57.928	98.4965	16.998	6.0292	1.10513	0.663249	1	0	0.010817	0.244361	24.4361	0	0
Botswana	2008	0	0	0.513505	0.610461	0.644566	0.517629	1.02253	1.03311	27.9063	27.8	0	-62.25	29.4219	-3.9622	-8.1803	-3.24	-3.02014	-0.585916	-0.475055	-1.1555	-0.537953	-2.00714	0.417069	-7.4247	3.25207	4.8544	59.444	99.0082	16.328	9.37273	1.13772	0.681245	0	0	-0.0892703	0.212927	21.2927	0	0
Botswana	2009	0	1	0.437099	0.586035	0.607087	0.415621	0.927734	0.953861	30.6145	28.9	0	-58.12	29.2132	-2.24572	-8.19242	-3.44	-1.55334	-0.637584	-0.464292	-1.15381	-0.148944	-0.9401	0.416702	-7.2401	-14.1442	2.06256	60.937	88.4808	16.169	15.1089	0.95458	0.580121	0	1	-0.143155	0.196004	19.6004	0	0
Botswana	2010	1	0	0.455533	0.596931	0.578394	0.38835	1.00335	0.99121	28.4959	29.9	0.0451128	-60.34	29.0045	-2.1052	-8.20455	-3.4	-1.5464	-0.582052	-0.351849	-0.79284	-0.299473	-0.895079	0.421975	-7.0854	10.1197	1.72806	62.412	94.639	17.86	7.68549	0.988516	0.598859	1	0	-0.16444	0.189319	18.9319	0	0
Botswana	2011	1	0	0.425984	0.6014	0.576675	0.411629	0.966567	1.06445	30.0804	28.9	0.0606695	-57.75	28.7957	-1.89429	-8.21667	-3.04	-1.28602	-0.553162	-0.322823	-0.770733	-0.247783	-0.715411	0.332177	-7.4893	6.83841	1.94041	63.865	98.9615	18.054	12.6534	1.00287	0.606787	1	0	-0.185807	0.182608	18.2608	0	0
Botswana	2012	0	1	0.53297	0.594522	0.692556	0.422315	0.906515	1.10404	26.9029	27.8	0.310541	-61.95	28.587	-2.25864	-8.1	-3.47	-1.54468	-0.552718	-0.389372	-0.747983	-0.333841	-0.82147	0.36598	-6.6538	-0.170857	1.0504	64.768	111.875	17.952	3.0118	1.10197	0.661506	0	1	-0.165601	0.188954	18.8955	0	0
Botswana	2013	1	0	0.489309	0.494382	0.635519	0.378747	0.893461	1.10235	25.9589	26.7	0.257576	-64.9	28.3782	-1.42514	-7.96458	-3.29	-1.01216	-0.53054	-0.402104	-1.2294	-0.272119	-0.337941	0.345291	-8.6067	11.1029	0.470418	65.572	125.783	18.203	1.53205	0.983255	0.595955	1	0	-0.183717	0.183265	18.3265	0	0
Botswana	2014	1	0	0.447421	0.539283	0.764808	0.298254	0.812724	1.01185	24.2327	25.8	0.124838	-70.76	28.1695	-0.927758	-7.82917	-3.39	-0.754637	-0.542096	-0.401436	-1.55014	-0.212808	-0.140392	0.243219	-9.7647	5.69714	3.3302	66.368	119.498	18.514	9.60155	0.940006	0.572074	1	0	-0.190151	0.181244	18.1244	0	0
Botswana	2015	0	1	0.450576	0.483199	0.552077	0.451488	0.780862	1.03137	24.7226	26.1	0.112159	-70.88	27.9608	-0.804775	-7.82917	-3.55	-0.713586	-0.587637	-0.465456	-1.84132	-0.211766	-0.036365	0.26727	-10.2096	-4.85133	2.79773	67.155	112.901	18.93	3.73031	0.875565	0.536492	0	1	-0.174639	0.186116	18.6116	0	0
Botswana	2016	1	0	0.40301	0.379932	0.727798	0.497389	0.866951	0.979198	26.0146	26.7	0.194723	-68.77	27.752	-0.762293	-8.3875	-3.17	-0.717346	-0.576735	-0.463316	-1.72631	-0.20405	-0.0499797	0.234829	-9.327	7.20442	0.944945	67.933	100.465	19.329	11.9049	0.928843	0.565911	1	0	-0.190442	0.181153	18.1153	0	0
Botswana	2017	1	0	0.393295	0.36062	0.59503	0.367127	0.71241	1.0093	25.3637	26.7	0.180886	-70.97	27.5433	-0.880112	-8.04167	-3.18	-0.79162	-0.562286	-0.44137	-1.86299	-0.301815	-0.0484341	0.30361	-9.6097	4.11438	1.61796	68.7	81.924	19.664	-2.64993	0.739917	0.461593	1	0	-0.183397	0.183365	18.3365	0	0
Botswana	2018	1	0	0.462252	0.383805	0.62393	0.254544	0.71906	0.95847	24.2104	25.6	0.174267	-73.75	27.3345	-0.869695	-8.5	-3.25	-0.760636	-0.550086	-0.325855	-1.8682	-0.381733	-0.0530477	0.318489	-10.6126	4.18869	1.67893	69.446	87.4551	19.681	0.0566219	0.725765	0.453778	1	0	-0.189274	0.181519	18.1519	0	0
Botswana	2019	0	0	0.498041	0.432969	0.498032	0.375832	0.685446	1.09533	26.2362	26.2	0.183787	-70.69	27.1258	-0.656054	-8.41667	-2.92	-0.566566	-0.50631	-0.290824	-1.86883	-0.230326	-0.0454156	0.330118	-9.349	3.03177	0.559653	70.172	83.093	20.094	0.508004	0.801039	0.495342	0	0	-0.207135	0.17591	17.591	0	0
Botswana	2020	0	1	0.488763	0.382222	0.527586	0.167879	0.610776	1.01317	29.071	27.7	0.272352	-64.25	26.9171	-0.675042	-9.18448	-2.89	-0.574856	-0.529729	-0.335192	-2.0161	-0.1877	-0.0519642	0.252775	-7.6837	-8.72888	0.212514	70.877	77.6634	21.017	4.37887	0.628514	0.40008	0	1	-0.191716	0.180753	18.0753	0	0
Brazil	2002	0	0	0.472238	-0.266611	0.182567	-0.0346153	0.0819423	0.3278	26.8019	42.9	85.7403	-57.19	64.989	-2.81547	-1.00247	-3.89	-1.5206	-0.339622	0	-1.29976	-1.27808	-0.242525	0.976345	-2192.84	3.05346	3.25358	81.88	27.6184	10.641	9.79811	-0.444197	-0.192231	0	0	0.203665	0.304929	30.4929	0	0
Brazil	2003	0	0	0.442829	-0.367894	0.196701	0.0817574	0.090239	0.00421393	28.7074	45.1	87.1637	-54.72	64.5163	-2.70034	-1.00813	-3.91	-1.36652	-0.321118	0	-1.2083	-1.2959	-0.0706271	0.935005	-3263.11	1.14083	1.8134	82.203	28.1404	11.168	14.091	-0.577708	-0.26595	0	0	0.243563	0.317459	31.7459	0	0
Brazil	2004	1	0	0.388609	-0.40092	0.0374142	-0.0922709	-0.0272687	-0.275993	29.0765	45.2	86.0318	-54.8	64.0436	-2.53496	-1.01378	-3.91	-1.41225	-0.290576	0	-1.11589	-1.36897	-0.0432815	0.850213	-3498.52	5.75996	2.71353	82.521	29.6783	10.072	7.75206	-0.942589	-0.467424	1	0	0.247754	0.318775	31.8775	0	0
Brazil	2005	0	0	0.45768	-0.475531	0.0369013	-0.15767	-0.153748	-0.26338	29.3597	46.1	87.1375	-54.36	63.5709	-3.65047	-1.01943	-3.88	-2.0176	-0.27151	0	-0.891278	-1.74965	-0.267949	0.87861	-2505.15	3.20213	1.73389	82.834	27.0868	10.551	7.43122	-1.02202	-0.511283	0	0	0.239451	0.316168	31.6168	0	0
Brazil	2006	1	0	0.500076	-0.40262	-0.0412734	-0.391295	-0.12048	-0.294911	29.7591	46.7	86.777	-53.54	63.0982	-3.82715	-1.02508	-3.86	-2.22067	-0.260701	0	-0.762154	-1.81165	-0.409024	0.933454	-2165.5	3.96199	1.75313	83.143	26.0417	9.692	6.77427	-1.11423	-0.562196	1	0	0.228951	0.31287	31.287	0	0
Brazil	2007	1	0	0.537074	-0.409779	-0.0228346	-0.29029	-0.0839888	-0.357948	30.5514	47.2	88.2273	-52.77	62.6255	-4.10201	-1.0991	-3.85	-2.26378	-0.239291	0	-0.663998	-1.51673	-0.747053	1.14269	-1842.18	6.06987	3.19083	83.448	25.2926	9.28	6.43904	-1.05768	-0.530972	1	0	0.212166	0.307598	30.7598	0	0
Brazil	2008	1	0	0.568986	-0.288045	0.0770274	-0.148201	0.00343737	-0.313425	31.4142	47	84.3346	-52.74	62.1529	-4.77605	-1.17296	-3.87	-2.72866	-0.231716	0	-0.606162	-1.81402	-0.914642	1.08084	-1975.44	5.0942	2.99061	83.749	27.2576	8.268	8.77855	-0.819665	-0.39955	1	0	0.23796	0.3157	31.5699	0	0
Brazil	2009	0	1	0.521999	-0.103855	0.127607	-0.151304	-0.0799856	0.163664	31.524	48.9	89.0545	-51.46	61.6802	-2.38487	-1.24688	-3.74	-1.19807	-0.233463	0	-0.592965	-1.01383	-0.184247	0.937355	-1335.47	-0.125812	1.88848	84.044	22.106	9.419	7.31348	-0.565725	-0.259334	0	1	0.129957	0.281779	28.1779	0	0
Brazil	2010	1	0	0.571349	0.0564144	0.24662	-0.0868625	0.0438064	0.0134759	30.5142	46.8	84.8164	-53.7	61.2075	-3.64871	-1.3208	-3.85	-1.67814	-0.215934	0	-0.53125	-1.12295	-0.555193	1.03174	-1349.94	7.52823	3.73001	84.335	22.7722	8.422	8.42334	-0.396114	-0.165681	1	0	0.151681	0.288602	28.8602	0	0
Brazil	2011	1	0	0.513676	0.0451417	0.258022	-0.152404	0.168382	-0.132575	28.6951	45.2	87.1952	-54.72	61.0233	-4.33687	-1.27744	-3.75	-2.17524	-0.203272	0	-0.489511	-1.52482	-0.650423	1.04986	-1465.9	3.97442	3.91518	84.631	23.9344	7.578	8.31859	-0.461724	-0.201909	1	0	0.17752	0.296717	29.6717	0	0
Brazil	2012	0	0	0.477906	-0.0769328	0.173244	-0.160549	-0.0468542	0.0459616	27.7483	43.5	82.5777	-56.45	60.8392	-3.85552	-1.23407	-3.82	-1.96148	-0.196581	0	-0.587139	-1.51444	-0.447037	0.845563	-1354.99	1.92118	3.75496	84.923	25.1143	7.251	7.94313	-0.591491	-0.273561	0	0	0.159557	0.291076	29.1076	0	0
Brazil	2013	0	0	0.417397	-0.0920452	0.14629	-0.119031	-0.0979596	-0.258553	27.6676	42.3	76.8252	-57.92	60.655	-3.78686	-1.1907	-3.88	-1.78797	-0.183611	0	-0.645382	-1.33361	-0.454357	0.771259	-1589.94	3.00482	3.04151	85.209	25.786	7.071	7.50456	-0.77096	-0.372657	0	0	0.155841	0.289909	28.9909	0	0
Brazil	2014	0	0	0.47193	-0.0529658	-0.02822	-0.175921	-0.366117	-0.0702901	27.6816	41.7	72.5771	-58.84	60.4709	-3.28623	-1.1486	-3.98	-1.7498	-0.17478	0	-0.71473	-1.39876	-0.351034	0.771619	-1482.39	0.503956	3.57135	85.492	24.6854	6.755	7.84671	-0.871873	-0.428378	0	0	0.144869	0.286463	28.6462	0	0
Brazil	2015	0	1	0.458871	-0.187333	-0.18191	-0.255272	-0.457841	-0.331864	29.3517	43.7	73.5401	-57.05	60.2867	-2.35833	-1.12807	-4.05	-1.11264	-0.17621	0	-0.954398	-0.857686	-0.254959	0.852315	-1587.1	-3.54576	3.59215	85.77	26.9536	8.538	7.56618	-1.19954	-0.609301	0	1	0.127257	0.280931	28.0931	0	0
Brazil	2016	0	1	0.451976	-0.201302	-0.189952	-0.249387	-0.446096	-0.381035	30.0377	45.4	79.7128	-54.54	60.071	-2.43014	-1.17135	-4.03	-1.02883	-0.180345	0	-0.913479	-0.686699	-0.342135	0.883308	-1593.24	-3.27592	4.13738	86.042	24.5337	11.58	8.1036	-1.22631	-0.624082	0	1	0.131225	0.282178	28.2177	0	0
Brazil	2017	0	0	0.449532	-0.305429	-0.130979	-0.317141	-0.559815	-0.479948	30.1089	45.3	78.4182	-54.9	59.8329	-2.73376	-1.16022	-4.06	-1.24905	-0.172313	0	-0.843512	-0.934977	-0.314078	0.865221	-1604.44	1.32287	3.33826	86.309	24.3197	12.792	3.67138	-1.36507	-0.7007	0	0	0.142152	0.28561	28.5609	0	0
Brazil	2018	0	0	0.376852	-0.302343	-0.293125	-0.52057	-0.480954	-0.459599	31.6101	46.9	81.5731	-52.43	59.7084	-3.61759	-1.1747	-3.93	-1.89875	-0.170102	0	-0.912362	-1.5803	-0.318458	0.828964	-1581.5	1.78367	4.07859	86.569	28.8762	12.329	4.49353	-1.52724	-0.790248	0	0	0.189026	0.300331	30.0331	0	0
Brazil	2019	0	0	0.301445	-0.22432	-0.121404	-0.234115	-0.407893	-0.714225	32.0716	47.5	81.4302	-51.87	59.5585	-3.21717	-1.19131	-3.95	-1.75977	-0.167589	0	-0.971501	-1.44609	-0.313685	0.793646	-1585.81	1.22078	3.69267	86.824	28.8903	11.936	4.22426	-1.38968	-0.714293	0	0	0.181988	0.29812	29.812	0	0
Brazil	2020	0	1	0.287395	-0.23192	-0.111012	-0.465709	-0.429083	-0.446891	33.9457	50	83.1761	-49.73	59.4175	-3.22988	-1.18689	-4	-1.31416	-0.172641	0	-1.24676	-0.949586	-0.364578	0.746045	-1581.4	-3.27676	2.59264	87.073	32.3021	13.697	6.4725	-1.39404	-0.716701	0	1	0.18324	0.298514	29.8514	0	0
Bulgaria	2002	1	0	0.528531	-0.05605	0.52768	0.173596	-0.171932	0.467512	3.42473	8.7	6.33567	-70.49	31.6857	-0.459806	-31.3748	-8.36	-0.046848	-0.384933	0	-5.24688	-0.0416534	-0.00519464	2.3598	-46.0377	5.87193	5.51519	69.524	75.2696	18.11	3.84838	-0.105133	-0.005012	1	0	0.0347436	0.251876	25.1876	0	0
Bulgaria	2003	1	0	0.545892	-0.171992	0.668375	0.0336971	-0.087321	0.173525	3.66399	9.2	7.74883	-74.1	32.0272	-0.430572	-31.0063	-8.14	-0.0397887	-0.392011	0	-4.68685	-0.0343812	-0.00540749	2.80096	-52.4903	5.23715	9.91626	69.879	79.0139	13.733	2.18941	-0.233433	-0.0758546	1	0	-2.66e-06	0.240963	24.0963	0	0
Bulgaria	2004	1	0	0.56969	-0.118168	0.707844	0.078745	0.0682041	0.00363073	3.92212	9.6	8.082	-73.98	32.363	-1.13721	-30.6378	-7.43	-0.318274	-0.357648	0	-3.94088	-0.261192	-0.0570821	3.00288	-50.0207	6.51043	11.7462	70.233	93.0639	12.037	5.58156	-0.166503	-0.0388985	1	0	-0.0330904	0.230572	23.0572	0	0
Bulgaria	2005	1	0	0.594893	-0.108558	0.657546	0.134381	0.0187454	0.147271	3.77013	9.8	10.6717	-72.99	32.732	-0.981902	-30.2693	-7.34	-0.330613	-0.328123	0	-3.72769	-0.169929	-0.160684	2.98477	-49.4507	7.05635	13.7205	70.584	99.7142	10.083	6.59426	-0.109826	-0.0076034	1	0	-0.0427232	0.227546	22.7546	0	0
Bulgaria	2006	1	0	0.577117	-0.108846	0.61654	-0.130292	-0.110586	0.394421	3.90714	10	10.0321	-72.56	33.0682	-1.83144	-29.9009	-7.08	-0.846985	-0.333961	0	-3.58033	-0.201743	-0.645242	2.7854	-54.0697	6.80259	22.9039	70.932	111.047	8.951	6.75647	-0.206406	-0.0609314	1	0	-0.029114	0.23182	23.182	0	0
Bulgaria	2007	1	0	0.690935	-0.0576844	0.643361	-0.121084	-0.231792	0.357635	3.70663	8.8	7.57757	-77.74	33.4076	-1.68647	-29.5324	-6.51	-0.744255	-0.334931	0	-3.29119	-0.215782	-0.528473	3.19168	-56.7036	6.65439	31.2286	71.278	123.533	6.878	11.0514	-0.180726	-0.046752	1	0	-0.0769104	0.216809	21.6809	0	0
Bulgaria	2008	1	0	0.577976	-0.121088	0.734122	-0.172577	-0.274787	0.369861	3.90678	9.9	7.58197	-76.16	33.7409	-1.9747	-30.5952	-6.05	-0.763722	-0.325997	0	-2.59025	-0.453473	-0.310249	3.28017	-55.2757	6.12956	18.8998	71.622	124.689	5.609	8.10346	-0.251129	-0.0856257	1	0	-0.110225	0.206346	20.6346	0	0
Bulgaria	2009	0	1	0.560471	-0.0403124	0.694785	0.0714814	-0.229268	0.353679	4.37157	11.6	10.0107	-73.46	34.0899	-0.704216	-29.1443	-5.49	-0.231038	-0.323857	0	-2.35332	-0.127658	-0.10338	2.84062	-46.8835	-3.34714	7.49016	71.963	92.6926	6.817	3.93802	-0.119624	-0.0130138	0	1	-0.163278	0.189684	18.9684	0	0
Bulgaria	2010	0	0	0.531483	-0.0970614	0.680433	-0.0653255	-0.237024	0.360091	5.17267	14.3	13.7702	-73.69	34.4234	-1.67975	-28.381	-5.5	-0.66586	-0.301189	0	-2.57636	-0.258182	-0.407678	2.7463	-50.2518	1.55536	3.6357	72.302	103.381	10.279	0.76413	-0.227706	-0.0726926	0	0	-0.116141	0.204488	20.4488	0	0
Bulgaria	2011	0	0	0.45008	-0.141564	0.55252	-0.0711114	-0.269264	0.30175	5.16968	13.2	9.26998	-75.52	34.6002	-2.14267	-30.4048	-5.8	-0.922677	-0.289332	0	-2.65004	-0.423927	-0.498751	2.67034	-59.1878	2.09018	3.6473	72.638	117.418	11.26	6.11283	-0.388394	-0.161418	0	0	-0.0944018	0.211316	21.1316	0	0
Bulgaria	2012	0	0	0.400916	-0.115051	0.574711	-0.0283869	-0.281461	0.379834	6.1341	15.6	12.7739	-72.61	34.7771	-1.60465	-27.2124	-5.5	-0.746725	-0.274893	0	-2.61069	-0.219659	-0.527067	2.64902	-54.3541	0.748815	3.2932	72.975	123.971	12.27	1.11218	-0.340065	-0.134733	0	0	-0.108286	0.206955	20.6955	0	0
Bulgaria	2013	0	1	0.337255	-0.147256	0.54911	-0.013233	-0.327893	0.17071	7.07961	18.2	17.5078	-70.14	34.9539	-1.10763	-26.0381	-5.12	-0.504882	-0.292117	0	-2.34878	-0.120358	-0.384524	2.84558	-50.2027	-0.542752	3.56336	73.313	129.689	12.941	0.0719518	-0.497325	-0.221566	0	1	-0.136547	0.198079	19.8079	0	0
Bulgaria	2014	0	0	0.366472	-0.0820291	0.585274	-0.112379	-0.303166	0.0785409	6.43006	17.1	16.7401	-71.17	35.1308	-0.784767	-25.6	-5.32	-0.315846	-0.313256	0	-2.50194	-0.0834928	-0.232353	2.83629	-51.5666	0.949449	1.91588	73.651	130.248	11.424	1.34078	-0.510892	-0.229057	0	0	-0.135901	0.198282	19.8282	0	0
Bulgaria	2015	1	0	0.432639	-0.159494	0.578268	-0.0125586	-0.346441	0.0104246	6.70213	17.9	18.794	-72.43	35.3077	-0.658724	-26.8067	-5.36	-0.232344	-0.306492	0	-3.14925	-0.0552488	-0.177095	2.95278	-55.9076	3.39755	4.37575	73.99	126.737	9.143	2.94775	-0.521191	-0.234744	1	0	-0.112462	0.205644	20.5644	0	0
Bulgaria	2016	0	0	0.402378	-0.140444	0.70129	0.0888326	-0.260856	0.0682794	7.45884	17.7	17.0803	-69.4	35.3814	-0.526341	-27.0905	-5.07	-0.187185	-0.304558	0	-2.85703	-0.0468257	-0.140359	2.98707	-51.6022	3.02663	2.75996	74.329	122.806	7.575	3.32356	-0.359381	-0.145399	0	0	-0.136591	0.198066	19.8066	0	0
Bulgaria	2017	0	0	0.430082	-0.124961	0.657787	0.0980096	-0.19633	0.32138	7.27462	17.1	14.8995	-70.82	35.5011	-0.749247	-26.9429	-5.11	-0.309361	-0.311448	0	-2.83731	-0.0622253	-0.247135	2.79841	-54.0303	2.74593	3.39255	74.669	129.634	6.164	4.81312	-0.222707	-0.0699319	0	0	-0.131646	0.199619	19.9618	0	0
Bulgaria	2018	0	0	0.365173	-0.10585	0.605753	0.111849	-0.18822	0.444411	9.53182	19.6	20.6175	-67.35	35.6209	-0.678373	-25.8333	-4.97	-0.283909	-0.318133	0	-2.49542	-0.061057	-0.222852	2.61954	-50.2386	2.54946	2.7318	75.008	128.866	5.211	4.25526	-0.206977	-0.0612465	0	0	-0.134527	0.198714	19.8714	0	0
Bulgaria	2019	1	0	0.354652	-0.0374134	0.530806	0.173703	-0.181221	0.561284	10.2652	19.3	17.9281	-65.63	35.7406	-0.58027	-25.819	-4.72	-0.24634	-0.322039	0	-2.38331	-0.0421169	-0.204223	2.99973	-48.8058	3.78885	3.23637	75.347	125.03	4.23	5.23549	-0.13727	-0.0227573	1	0	-0.15467	0.192387	19.2387	0	0
Bulgaria	2020	0	1	0.259387	-0.127673	0.460991	-0.214028	-0.32235	0.401631	11.1409	21.1	19.5452	-62.09	35.8604	-0.618936	-24.1714	-4.68	-0.295403	-0.337084	0	-2.26063	-0.0269689	-0.268434	3.00281	-43.9072	-3.21574	4.6926	75.686	110.324	5.125	4.34104	-0.557334	-0.254701	0	1	-0.149716	0.193943	19.3943	0	0
Burkina Faso	2002	1	0	-0.387817	-0.799849	-0.137807	-0.846448	0.12032	-0.306921	80.5955	81.8	17.4685	-18.56	26.0106	-5.72816	-5.728	-5.11	-0.0274446	-3.50052	0	-0.539195	0	-0.0274446	0.71506	-44.0231	4.35296	0.414816	19.258	31.3125	2.851	3.05699	-1.85126	-0.969158	1	0	0.013862	0.245318	24.5318	0	0
Burkina Faso	2003	1	0	-0.309724	-0.624178	-0.361613	-0.812532	-0.107514	0.0671201	80.6185	80.8	21.5483	-18.64	25.8279	-6.32363	-6	-4.94	-0.00787699	-3.3323	0	-0.466343	0	-0.00787699	0.73185	-48.29	7.80249	0.614299	19.996	30.3682	2.78	1.48473	-1.76753	-0.922924	1	0	0.0172826	0.246392	24.6392	0	0
Burkina Faso	2004	1	0	-0.433709	-0.535743	-0.329019	-0.696795	-0.149054	-0.0812375	81.0553	82	21.4051	-18.1	25.6451	-5.43726	-6.272	-4.78	-0.0181097	-3.22184	0	-0.432574	0	-0.0181097	0.794827	-49.5631	4.47845	0.26319	20.757	35.4809	3.473	0.0906486	-1.79545	-0.938344	1	0	-0.0002546	0.240884	24.0884	0	0
Burkina Faso	2005	1	0	-0.44652	-0.500521	-0.456179	-0.604899	-0.105527	-0.0626529	81.5334	85.4	19.4333	-17.55	25.4624	-6.37353	-6.544	-5.51	-0.0320779	-3.11117	0	-0.405475	0	-0.0320779	0.739038	-51.1439	8.66187	0.848146	21.537	34.1722	4	3.73939	-1.78064	-0.930164	1	0	0.0430211	0.254476	25.4476	0	0
Burkina Faso	2006	1	0	-0.341834	-0.433823	-0.396016	-0.800564	-0.310118	0.1558	79.5824	84.8	14.7208	-19.6	25.2796	-6.43345	-6.544	-5.48	-0.0935971	-3.00324	0	-0.465772	0	-0.0935971	0.716672	-52.5724	6.25316	1.28065	22.339	35.1065	3.669	-0.662827	-1.75421	-0.915572	1	0	0.0382184	0.252967	25.2967	0	0
Burkina Faso	2007	1	0	-0.307009	-0.395826	-0.313473	-0.770006	-0.329598	0.307009	77.8111	82.9	18.2059	-21.37	25.0969	-7.81292	-6.544	-5.71	-0.000147517	-2.84845	0	-0.477586	0	-0.000147517	0.7538	-54.4484	4.11138	0.284718	22.996	33.7797	3.3	2.49235	-1.61049	-0.836214	1	0	0.0637929	0.260999	26.0999	0	0
Burkina Faso	2008	1	0	-0.283481	-0.344682	-0.229374	-0.530284	-0.309015	0.118725	78.7683	83.5	21.9242	-20.32	24.9141	-8.59697	-6.544	-5.74	-0.318684	-2.77783	0	-0.484606	0	-0.318684	0.670474	-56.4467	5.79999	0.35117	23.534	35.3853	3.496	9.1598	-1.49848	-0.774366	1	0	0.0918742	0.269819	26.9819	0	0
Burkina Faso	2009	0	0	-0.289742	-0.204172	-0.141745	-0.61747	-0.345607	0.0340403	78.9973	83.3	18.9	-20.12	24.7314	-9.57845	-6.544	-5.64	-1.03444	-2.75566	0	-0.511917	0	-1.03444	0.663706	-57.7709	2.96195	0.599469	24.079	40.296	3.711	2.4055	-1.48555	-0.767226	0	0	0.117638	0.27791	27.791	0	0
Burkina Faso	2010	1	0	-0.25295	-0.194905	-0.208372	-0.589096	-0.356885	-0.117637	82.6031	82.1	13.8518	-15.96	24.5486	-11.0861	-6.544	-5.31	-3.19018	-2.64638	0	-0.667284	0	-3.19018	0.665168	-60.0373	8.44628	0.384492	24.633	49.0732	3.723	3.77962	-1.55421	-0.805139	1	0	0.187593	0.299881	29.9881	0	0
Burkina Faso	2011	1	0	-0.280185	-0.350399	-0.205171	-0.568244	-0.37865	-0.555381	82.2733	81.4	8.99781	-16.42	24.3658	-13.6362	-6.544	-5.3	-5.60932	-2.57493	0	-0.632969	0	-5.60932	0.653616	-61.7394	6.62256	1.19074	25.196	57.4973	3.827	6.738	-1.82088	-0.952385	1	0	0.274765	0.327259	32.7259	0	0
Burkina Faso	2012	1	0	-0.304971	-0.425855	-0.139084	-0.632368	-0.482447	-0.573129	80.1684	79.2	8.65044	-18.57	24.183	-12.4016	-6.544	-5.42	-4.01486	-2.53216	0	-0.746077	0	-4.01486	0.759767	-61.8613	6.45267	2.62146	25.767	61.2386	3.856	5.824	-1.91295	-1.00322	1	0	0.219331	0.309849	30.9849	0	0
Burkina Faso	2013	1	0	-0.255502	-0.52673	-0.197507	-0.670199	-0.525528	-0.76339	80.2279	78.7	8.38984	-18.57	24.0001	-10.7523	-6.544	-5.5	-2.85308	-2.50437	0	-0.773494	0	-2.85308	0.524204	-65.2542	5.79258	3.64767	26.346	64.0359	4.055	-2.12917	-2.08098	-1.096	1	0	0.172879	0.29526	29.526	0	0
Burkina Faso	2014	1	0	-0.352607	-0.545771	-0.340954	-0.592532	-0.466839	-0.787129	80.1071	78.9	6.23128	-18.86	23.8173	-10.3109	-6.544	-5.55	-2.23094	-2.59582	0	-0.802797	0	-2.23094	0.766753	-64.6613	4.32685	2.56255	26.934	58.8236	4.251	-0.620387	-2.15472	-1.13672	1	0	0.148051	0.287462	28.7462	0	0
Burkina Faso	2015	1	0	-0.114222	-0.541129	-0.424238	-0.692134	-0.299045	-0.609127	78.5888	78.8	5.18326	-20.53	23.6345	-11.6329	-6.544	-5.8	-1.95831	-2.68949	0	-1.13927	0	-1.95831	0.958755	-68.3292	3.92123	1.95993	27.53	59.0892	4.461	-2.22395	-1.98624	-1.04369	1	0	0.175292	0.296017	29.6017	0	0
Burkina Faso	2016	1	0	0.0134272	-0.455298	-0.447477	-0.638991	-0.169877	-0.868711	77.4532	77.1	8.37717	-21.28	23.4518	-12.6155	-6.544	-5.5	-2.92312	-2.69477	0	-1.08364	0	-2.92312	0.968721	-69.0515	5.95798	3.0438	28.134	57.8932	4.587	2.6043	-1.93467	-1.01522	1	0	0.198283	0.303238	30.3238	0	0
Burkina Faso	2017	1	0	0.0645605	-0.414963	-0.481158	-0.638492	-0.13878	-0.927886	75.718	74.6	7.89769	-23.09	23.269	-12.3099	-6.544	-5.61	-3.27309	-2.62201	0	-1.17675	0	-3.27309	1.12343	-70.1216	6.20349	0.018237	28.743	59.2688	4.656	1.4163	-1.92227	-1.00837	1	0	0.201983	0.3044	30.44	0	0
Burkina Faso	2018	1	0	-0.0616534	-0.459258	-0.405249	-0.644067	-0.131607	-1.06026	74.5736	73.7	9.78532	-24.04	23.0863	-8.8762	-6.544	-5.71	-3.00138	-2.53244	0	-1.18901	0	-3.00138	1.15759	-71.2377	6.60457	1.6892	29.358	60.5956	4.695	1.07397	-2.01739	-1.06089	1	0	0.148886	0.287724	28.7724	0	0
Burkina Faso	2019	1	0	-0.208246	-0.463834	-0.422923	-0.778186	-0.219493	-1.30219	74.2568	72.7	13.1478	-24.05	22.9035	-8.32797	-6.544	-5.57	-2.89448	-2.46556	0	-1.33034	0	-2.89448	1.12035	-72.5821	5.8892	1.01648	29.98	60.4087	4.71	0.512901	-2.29438	-1.21383	1	0	0.141607	0.285438	28.5438	0	0
Burkina Faso	2020	0	0	-0.18944	-0.468719	-0.4827	-0.708107	-0.122199	-1.53798	70.2704	73.1	13.4592	-27.31	22.7208	-9.17783	-6.544	-5.53	-3.46066	-2.4754	0	-1.33255	0	-3.46066	1.06565	-68.9637	2.01077	-0.55728	30.607	60.7398	5.04	6.4656	-2.34603	-1.24235	0	0	0.159238	0.290975	29.0975	0	0
Cameroon	2002	1	0	-1.09705	-1.26538	-1.02414	-0.911197	-1.20911	-0.677265	80.6498	85.2	96.4242	-15.3	45.3938	-5.27983	-0.371868	-5.71	-4.81306	-2.05818	-2.3331	-0.880517	-2.45845	-0.0215049	0.807324	47.2841	4.47703	4.06898	46.738	48.4817	6.709	2.77449	-3.55611	-1.91051	1	0	0.436675	0.378109	37.8109	0	0
Cameroon	2003	1	0	-1.06001	-1.1633	-0.972793	-0.84292	-0.981341	-0.429471	79.5877	85.3	95.7693	-16.1	45.2463	-5.08268	-0.380806	-5.67	-4.66096	-1.95694	-2.85173	-0.708886	-1.80325	-0.0059754	0.772507	46.5853	5.45315	2.09694	47.338	40.2432	5.908	1.95291	-3.23721	-1.73443	1	0	0.421389	0.373308	37.3308	0	0
Cameroon	2004	1	0	-0.974191	-1.17322	-0.720635	-0.810299	-1.12544	-0.359356	79.2373	85.5	95.3805	-16.12	45.0989	-4.73179	-0.389744	-5.49	-4.12719	-1.84151	-2.00531	-0.613151	-2.11479	-0.00708588	0.790578	46.8256	7.04886	0.361118	47.94	41.8377	5.091	0.139488	-3.09358	-1.65512	1	0	0.377703	0.359588	35.9588	0	0
Cameroon	2005	0	0	-1.03407	-1.19044	-0.912782	-0.931052	-1.19941	-0.182025	80.784	86.3	94.2093	-14.78	44.9514	-7.39167	-0.398681	-5.47	-6.4606	-1.8488	-2.14388	-0.614042	-4.30571	-0.0110138	0.741887	46.6493	2.22827	1.24861	48.541	44.9977	4.4	1.35714	-3.23302	-1.73211	0	0	0.519439	0.404102	40.4102	0	0
Cameroon	2006	1	0	-1.0239	-1.16298	-0.84223	-0.97205	-1.09146	-0.244705	78.0927	85.5	76.2268	-16.96	44.804	-8.54391	-0.398681	-4.88	-7.40053	-1.79607	-2.34379	-0.604244	-5.02852	-0.0282229	0.73478	47.3484	3.80958	0.28274	49.143	47.1044	3.729	2.29967	-3.18173	-1.70379	1	0	0.531796	0.407983	40.7983	0	0
Cameroon	2007	1	0	-1.04957	-1.18582	-0.836638	-0.854186	-1.03304	-0.326109	66.0474	80.8	73.3794	-28.76	44.6565	-8.98192	-0.398681	-4.41	-7.89605	-1.75621	-2.96037	-0.673863	-4.90756	-0.0281078	0.695507	46.504	4.32759	0.792291	49.746	53.2157	3.063	0.490708	-3.15786	-1.69061	1	0	0.517422	0.403469	40.3469	0	0
Cameroon	2008	0	0	-1.0678	-1.10584	-0.818746	-0.828287	-1.03423	-0.552111	66.8373	80.8	74.4989	-27.5	44.5091	-10.0769	-0.398681	-4.33	-9.46139	-1.73471	-2.95051	-0.62816	-6.48047	-0.0304136	0.629966	46.7209	2.84768	0.0757547	50.35	56.9244	3.387	4.94054	-3.20631	-1.71737	0	0	0.599509	0.42925	42.925	1	0
Cameroon	2009	0	0	-1.04036	-1.13095	-0.769573	-0.853785	-1.02055	-0.474782	64.2906	79.2	69.4448	-30.74	44.3616	-5.82385	-0.398681	-4.56	-5.47165	-1.71446	-2.58154	-0.697912	-2.84645	-0.043662	0.649782	45.9358	2.57925	2.67167	50.954	42.1761	3.744	3.60352	-3.15389	-1.68842	0	0	0.361207	0.354407	35.4407	0	0
Cameroon	2010	0	0	-1.05827	-1.07924	-0.753018	-0.90304	-1.07532	-0.736971	63.7729	78.7	72.2266	-31	44.2142	-6.92042	-0.398681	-4.47	-6.36601	-1.72844	-2.67913	-0.735351	-3.63347	-0.0533992	0.666894	46.3125	2.89902	1.94952	51.559	47.2386	4.11	0.688187	-3.28724	-1.76205	0	0	0.414982	0.371296	37.1296	0	0
Cameroon	2011	1	0	-1.03312	-1.0809	-0.810016	-0.894476	-1.16693	-0.661688	65.7576	78.6	74.0837	-29.09	44.0957	-8.16417	-0.398681	-4.53	-7.4329	-1.7378	-2.77619	-0.669796	-4.57393	-0.0827832	0.638423	46.6932	3.37921	2.1327	52.164	51.522	3.987	2.58904	-3.30688	-1.7729	1	0	0.484068	0.392994	39.2994	0	0
Cameroon	2012	1	0	-1.02158	-1.04293	-0.931122	-0.905475	-1.27244	-0.588517	67.7142	78.6	77.6221	-26.25	43.9772	-8.40581	-0.398681	-4.53	-7.69342	-1.73868	-2.99743	-0.719503	-4.6214	-0.0745931	0.683215	45.9291	4.62598	1.74884	52.769	50.036	3.835	1.94229	-3.36204	-1.80335	1	0	0.510027	0.401147	40.1147	0	0
Cameroon	2013	1	0	-1.03698	-1.05832	-0.959768	-0.925761	-1.21772	-0.532237	69.2167	77.7	68.5719	-25.31	43.8588	-7.33303	-0.398681	-4.51	-6.87205	-1.72401	-3.13304	-0.737129	-3.6909	-0.0481148	0.709733	43.919	4.99553	1.62297	53.373	49.6745	3.685	3.05346	-3.35255	-1.79812	1	0	0.452243	0.382999	38.2999	0	0
Cameroon	2014	1	0	-0.94458	-0.897854	-0.898472	-0.812918	-1.17888	-1.05925	67.9876	76.9	63.2453	-26.99	43.7403	-7.03591	-0.398681	-4.63	-6.5497	-1.66207	-3.21718	-0.769555	-3.29873	-0.0337942	0.717489	41.6382	5.71982	1.99484	53.976	50.8324	3.534	2.01421	-3.36588	-1.80547	1	0	0.431651	0.376531	37.6531	0	0
Cameroon	2015	1	0	-0.954289	-0.998328	-0.936662	-0.833808	-1.09659	-0.989914	68.0907	78.1	54.8885	-27.8	43.6218	-5.63563	-0.398681	-4.61	-5.4405	-1.58071	-3.63406	-0.925865	-1.77169	-0.0347485	0.5982	38.605	5.66695	2.15564	54.578	45.5401	3.518	0.309792	-3.38008	-1.81332	1	0	0.365799	0.35585	35.585	0	0
Cameroon	2016	1	0	-1.03097	-1.05906	-0.809304	-0.822787	-1.17942	-1.06121	68.5616	78.8	58.1958	-27.02	43.5034	-5.36737	-0.398681	-4.52	-5.23335	-1.54722	-3.74378	-0.980512	-1.4469	-0.0426784	0.579929	38.4061	4.53579	1.96335	55.179	40.6386	3.528	0.661809	-3.43868	-1.84567	1	0	0.358151	0.353448	35.3447	0	0
Cameroon	2017	1	0	-1.05181	-1.0513	-0.846452	-0.861257	-1.22517	-1.09151	69.8071	79.2	63.1285	-25.51	43.3849	-6.08353	-0.398681	-4.41	-5.85111	-1.49088	-3.81934	-0.968232	-1.99932	-0.0324598	0.631891	39.6573	3.54118	2.25621	55.777	39.199	3.568	1.02514	-3.51222	-1.88628	1	0	0.399477	0.366427	36.6427	0	0
Cameroon	2018	1	0	-1.12888	-1.10306	-0.81262	-0.857635	-1.16307	-1.4018	69.8665	78.7	59.4877	-25.64	43.2664	-6.10464	-0.398681	-4.35	-5.61274	-1.44418	-3.01942	-0.957652	-2.59332	0	0.618112	39.2993	3.95551	1.91486	56.374	40.5876	3.601	1.89699	-3.65825	-1.96691	1	0	0.378306	0.359777	35.9778	0	0
Cameroon	2019	1	0	-1.21104	-1.14146	-0.847179	-0.866083	-1.21736	-1.56182	70.759	78.9	60.2311	-24.63	43.148	-5.55584	-0.398681	-4.27	-5.07371	-1.4181	-2.69982	-0.990385	-2.37389	0	0.59745	38.5976	3.47506	2.58341	56.968	43.3785	3.622	1.16977	-3.82407	-2.05847	1	0	0.346527	0.349797	34.9797	0	0
Cameroon	2020	0	0	-1.20542	-1.16767	-0.830199	-0.931411	-1.13954	-1.51368	70.8406	78.9	59.0702	-24.88	43.0295	-4.34202	-0.398681	-4.36	-4.05271	-1.41721	-2.76	-0.998752	-1.29271	0	0.618613	37.8268	0.259933	1.65596	57.56	33.7388	3.87	0.705572	-3.80173	-2.04613	0	0	0.287029	0.33111	33.111	0	0
Canada	2002	0	0	1.49905	1.6614	1.53392	1.86086	1.98223	1.21803	5.00249	20.1	59.9215	-75.72	38.7823	-2.86861	-1.46398	-7.79	-1.59403	-0.0517095	0	-1.42528	-1.48393	-0.110102	1.31341	-710.428	2.99926	3.21915	79.888	75.707	7.665	1.25752	3.57814	2.02875	0	0	0.121213	0.279033	27.9033	0	0
Canada	2003	0	0	1.54756	1.69706	1.52461	1.92468	1.93129	1.05308	4.81335	19.7	58.9481	-76.96	38.7769	-4.12924	-1.46113	-8.07	-2.60354	-0.0526331	0	-1.30992	-2.48499	-0.118555	1.33049	-730.109	1.80639	0.782968	79.967	69.8401	7.574	3.24974	3.54888	2.0126	0	0	0.186053	0.299397	29.9397	0	0
Canada	2004	0	0	1.66845	1.68715	1.61642	1.9007	1.80587	0.876447	5.18473	20.4	58.4755	-75.41	38.7716	-4.43822	-1.45828	-7.96	-2.52846	-0.0506277	0	-1.17809	-2.31199	-0.216463	1.25923	-717.94	3.09236	0.141466	80.045	70.1924	7.185	3.26087	3.50605	1.98895	0	0	0.1786	0.297056	29.7056	0	0
Canada	2005	0	0	1.50688	1.65015	1.56575	1.88246	1.8697	0.828725	4.90344	21.6	59.8664	-75.42	38.7662	-5.56482	-1.45543	-7.8	-3.31552	-0.0490009	0	-1.11161	-3.11533	-0.200195	1.20358	-744.108	3.21045	2.17816	80.122	69.7591	6.758	3.11664	3.38958	1.92464	0	0	0.224716	0.31154	31.154	0	0
Canada	2006	0	0	1.41559	1.80108	1.55866	1.89211	1.95279	1.03496	4.62845	21.5	59.5712	-75.56	38.7609	-4.08382	-1.45258	-7.72	-1.98663	-0.0459646	0	-1.02102	-1.53009	-0.456548	1.16568	-727.698	2.63794	4.8741	80.213	68.0522	6.484	2.57017	3.53958	2.00746	0	0	0.133495	0.28289	28.289	0	0
Canada	2007	0	0	1.38467	1.7971	1.60639	1.75482	1.99088	1.00701	4.81945	21.6	60.2797	-75.74	38.7555	-3.90023	-1.44973	-7.55	-1.82045	-0.0443091	0	-1.01723	-1.25401	-0.566433	1.1445	-752.393	2.0499	8.20056	80.396	66.2834	6.156	3.30055	3.48919	1.97964	0	0	0.117273	0.277796	27.7796	0	0
Canada	2008	0	0	1.40753	1.79639	1.65094	1.78248	1.98772	1.04137	4.59934	21.6	61.3689	-75.02	38.7502	-5.07362	-1.40552	-7.29	-2.17782	-0.0427032	0	-0.96547	-1.8161	-0.361721	1.08757	-722.336	0.995406	4.51514	80.578	67.0236	6.284	3.99632	3.54703	2.01157	0	0	0.143154	0.285924	28.5924	0	0
Canada	2009	0	1	1.4019	1.79673	1.69658	1.74208	2.0518	1.12708	4.67143	22.2	63.0072	-74.97	38.7448	-1.92304	-1.36131	-7.23	-0.512977	-0.0429245	0	-1.06573	-0.356614	-0.156363	1.16535	-654.074	-2.91509	1.52413	80.758	58.4744	8.46	-2.32492	3.61199	2.04745	0	1	0.0307136	0.25061	25.061	0	0
Canada	2010	0	0	1.35266	1.79859	1.69343	1.77783	2.06187	0.936318	4.58274	21.4	61.2842	-75.34	38.7395	-2.12754	-1.30522	-7.02	-0.559055	-0.0402793	0	-0.968021	-0.273816	-0.285239	1.15807	-705.35	3.09081	1.83726	80.937	60.2081	8.178	2.84864	3.52822	2.00119	0	0	0.0206455	0.247448	24.7448	0	0
Canada	2011	0	0	1.38014	1.72712	1.68484	1.77255	1.97113	1.07718	4.62358	21.5	62.4974	-74.87	38.7349	-2.59347	-1.24912	-6.96	-0.732313	-0.0376201	0	-0.931223	-0.350185	-0.382129	1.17326	-729.239	3.13719	2.13783	81.096	62.4987	7.637	3.24446	3.52419	1.99896	0	0	0.0320731	0.251037	25.1037	0	0
Canada	2012	0	0	1.43751	1.75642	1.70719	1.75697	1.9189	1.11302	4.65366	21.8	63.6797	-74.87	38.7303	-1.44308	-1.2786	-6.88	-0.450995	-0.0362879	0	-0.944963	-0.198904	-0.252091	1.17007	-716.133	1.75566	2.70017	81.137	62.5955	7.392	1.21844	3.56077	2.01916	0	0	0.0045022	0.242378	24.2378	0	0
Canada	2013	0	0	1.45344	1.74751	1.72989	1.78074	1.87938	1.06142	4.9361	22.2	64.1274	-73.62	38.7257	-1.7142	-1.30807	-6.86	-0.447519	-0.035322	0	-0.987749	-0.266699	-0.180819	1.15991	-727.469	2.32581	3.6298	81.178	62.2311	7.143	1.74074	3.54753	2.01185	0	0	0.0135419	0.245217	24.5217	0	0
Canada	2014	0	0	1.41233	1.8863	1.83873	1.75372	1.83219	1.1755	4.90152	22.2	63.2378	-73.74	38.721	-1.68853	-1.28088	-6.84	-0.544168	-0.0340873	0	-1.06453	-0.359203	-0.184965	1.126	-719.91	2.87347	3.5539	81.218	64.3787	7.023	1.9412	3.66203	2.07508	0	0	0.018594	0.246804	24.6804	0	0
Canada	2015	0	0	1.4673	1.80714	1.70606	1.73094	1.84565	1.26234	4.70487	22.3	64.1706	-74.67	38.7164	-0.332934	-1.25368	-6.75	-0.150823	-0.0339303	0	-1.26757	-0.0300156	-0.120807	1.17301	-754.642	0.649971	3.85389	81.259	66.1649	6.945	-0.867651	3.61786	2.05069	0	0	-0.0110754	0.237486	23.7486	0	0
Canada	2016	0	0	1.44561	1.80091	1.72741	1.74454	1.94447	1.24041	4.56412	22.1	65.0153	-75.63	38.712	-0.786495	-1.26286	-6.96	-0.245201	-0.0345858	0	-1.32487	-0.123509	-0.121692	1.13823	-738.491	1.03855	2.23835	81.3	65.3637	7.038	0.716978	3.65366	2.07045	0	0	0.0086884	0.243693	24.3693	0	0
Canada	2017	0	0	1.47808	1.76344	1.87966	1.81557	1.88145	1.08968	4.62483	22.8	66.6133	-76.04	38.7079	-1.1969	-1.27204	-7.03	-0.356669	-0.0340789	0	-1.30541	-0.210663	-0.146006	1.27596	-753.069	3.03383	1.53752	81.35	65.1011	6.426	2.57101	3.66847	2.07863	0	0	0.0220852	0.2479	24.79	0	0
Canada	2018	0	0	1.50241	1.71514	1.69942	1.67513	1.79021	0.963971	4.46413	22.3	65.9975	-76.23	38.7038	-1.7982	-1.27204	-6.94	-0.507451	-0.0335623	0	-1.34005	-0.410042	-0.0974092	1.16734	-781.818	2.74296	2.46931	81.411	66.5999	5.837	1.65112	3.41362	1.93791	0	0	0.0368962	0.252552	25.2552	0	0
Canada	2019	0	0	1.43031	1.71978	1.71	1.69731	1.7299	0.994934	4.33738	22.4	65.9263	-76.66	38.6996	-1.93318	-1.27204	-6.86	-0.525707	-0.0330453	0	-1.37589	-0.416681	-0.109025	1.21859	-768.292	1.90843	2.80677	81.482	66.1715	5.69	1.54607	3.38673	1.92306	0	0	0.0364481	0.252411	25.2411	0	0
Canada	2020	0	1	1.47167	1.6191	1.59259	1.59831	1.56571	1.01318	4.21065	23.9	67.109	-75.77	38.6955	-1.24182	-1.27204	-6.73	-0.359354	-0.0336104	0	-1.40957	-0.223536	-0.135818	1.20173	-697.707	-5.03823	1.75897	81.562	61.1568	9.657	1.07081	3.19689	1.81824	0	1	0.016508	0.246149	24.6149	0	0
Chile	2002	0	0	1.08719	1.25724	1.3185	1.07849	1.47917	1.0888	18.6999	33.1	56.2753	-73.2	21.5172	-3.69658	-3.51294	-4.39	-1.65882	-0.165122	0	-1.46455	-0.039369	-1.61945	1.54901	-26.9341	3.2028	3.62906	86.606	62.4839	10.168	3.34066	2.48672	1.42611	0	0	-0.0749459	0.217426	21.7426	0	0
Chile	2003	1	0	1.05612	1.17721	1.33344	1.10025	1.1671	0.761612	17.5716	31.6	51.5621	-74.56	21.6393	-5.01162	-3.63059	-4.24	-2.75511	-0.165288	0	-1.45235	-0.0297677	-2.72534	1.4512	-15.7624	4.72325	4.55695	86.665	65.6934	9.765	4.3003	2.18517	1.25961	1	0	-0.0439866	0.22715	22.7149	0	0
Chile	2004	1	0	1.22529	1.1657	1.36798	1.11775	1.30586	0.691342	17.3504	31.4	48.0843	-75.18	21.7615	-9.56665	-3.75222	-4.23	-6.18786	-0.158568	0	-1.32142	-0.0263459	-6.16152	1.26272	-26.9074	6.67425	5.01507	86.725	69.8894	10.162	7.02476	2.3087	1.32781	1	0	0.0966026	0.271304	27.1304	0	0
Chile	2005	1	0	1.29252	1.21021	1.31246	1.15561	1.41653	0.842384	17.0726	32.3	55.0358	-74.24	21.8836	-9.79631	-3.87385	-4.12	-6.12053	-0.15192	0	-1.15592	-0.031641	-6.08889	1.26218	-28.7908	5.83705	4.89871	86.783	72.0625	9.34	7.12032	2.45891	1.41076	1	0	0.0970467	0.271443	27.1443	0	0
Chile	2006	1	0	1.08234	1.18129	1.42389	0.937738	1.41256	0.613006	16.8398	32.9	56.3268	-74.01	22.0058	-17.3488	-3.99548	-4.05	-11.5767	-0.148056	0	-1.02001	-0.0257815	-11.551	1.03595	-27.3473	6.04999	3.09102	86.842	73.7116	9.024	12.3499	2.20841	1.27244	1	0	0.333656	0.345754	34.5754	0	0
Chile	2007	1	0	1.10488	1.19519	1.48559	1.18674	1.34515	0.406371	17.0197	30.5	45.07	-76.02	22.1279	-17.1518	-3.99638	-3.99	-11.1098	-0.139885	0	-1.0685	-0.02343	-11.0864	1.10849	-47.0078	5.16823	6.11349	86.9	76.977	8.427	5.08876	2.25204	1.29653	1	0	0.303833	0.336388	33.6388	0	0
Chile	2008	1	0	1.01351	1.21036	1.50248	1.06214	1.31799	0.431913	17.6193	30.8	46.5513	-75.18	22.25	-13.8254	-3.99638	-3.81	-8.30773	-0.132233	0	-1.10235	-0.028959	-8.27877	0.896895	-52.2812	3.78939	10.4571	86.959	80.6766	9.285	0.311132	2.16931	1.25085	1	0	0.189355	0.300434	30.0434	0	0
Chile	2009	0	1	1.0169	1.19409	1.4274	1.13757	1.32123	0.602584	18.7428	31.5	49.7283	-73.47	22.3722	-8.79204	-3.99638	-3.75	-5.30793	-0.138622	0	-1.13205	-0.0301927	-5.27774	0.897386	-44.6059	-1.11804	7.42256	87.017	66.686	11.313	3.5778	2.23463	1.28692	0	1	0.0504086	0.256796	25.6796	0	0
Chile	2010	1	0	1.09565	1.22542	1.41517	1.15724	1.44163	0.679605	15.9797	27	40.7618	-77.6	22.4943	-11.9882	-3.99638	-3.7	-6.45493	-0.136184	0	-0.981713	-0.0169231	-6.438	1.00265	-39.0785	5.85165	6.84145	87.074	69.7177	8.278	8.85744	2.36975	1.36152	1	0	0.0941873	0.270545	27.0545	0	0
Chile	2011	1	0	1.07391	1.26334	1.44054	1.15227	1.47659	0.452553	17.6713	28.8	39.7271	-76.67	22.7286	-12.1645	-3.99638	-3.8	-6.51405	-0.14064	0	-0.994554	-0.0218338	-6.49222	1.04826	-49.0971	6.2239	10.4898	87.132	72.4816	7.277	3.26051	2.30507	1.32581	1	0	0.106708	0.274477	27.4477	0	0
Chile	2012	1	0	1.07695	1.28766	1.5362	1.17844	1.54359	0.331102	25.1676	30.3	36.7305	-70.05	22.9628	-9.05443	-3.99638	-3.96	-4.69624	-0.135869	0	-0.964666	-0.0213218	-4.67492	1.08531	-59.1652	6.15534	11.9097	87.189	68.1561	6.562	0.763467	2.35254	1.35203	1	0	0.0363673	0.252386	25.2386	0	0
Chile	2013	0	0	1.10629	1.25514	1.48287	1.15803	1.49893	0.363743	26.8533	30.2	35.9063	-68.5	23.1971	-7.66232	-3.99638	-3.97	-3.81903	-0.135952	0	-1.01286	-0.0212507	-3.79778	1.09405	-54.2812	3.30851	7.61396	87.246	65.1433	6.074	2.26077	2.3109	1.32903	0	0	0.0002426	0.24104	24.104	0	0
Chile	2014	0	0	1.0559	1.3487	1.48459	1.03507	1.44073	0.447517	21.23	27	43.119	-72.36	23.4313	-6.87781	-3.99638	-3.52	-3.4043	-0.138475	0	-1.03989	-0.0151737	-3.38913	1.17129	-54.413	1.79265	9.835	87.303	65.6346	6.483	5.85289	2.28704	1.31585	0	0	-0.0422381	0.227699	22.7699	0	0
Chile	2015	0	0	1.00457	1.21973	1.31984	0.918836	1.18246	0.424872	20.5542	25.1	43.6471	-72.75	23.6655	-4.04462	-3.99638	-3.52	-1.78674	-0.136105	0	-1.20881	-0.00697663	-1.77976	1.15302	-69.7873	2.15194	7.3278	87.36	59.3491	6.313	4.95437	1.95514	1.13259	0	0	-0.116661	0.204325	20.4325	0	0
Chile	2016	0	0	0.99582	0.960394	1.36391	0.833844	1.02276	0.402406	20.5494	24.6	43.4618	-72.89	23.8309	-3.2057	-3.99638	-3.68	-1.42984	-0.132065	0	-1.28154	-0.00532376	-1.42452	1.18151	-59.4778	1.75304	4.55707	87.422	56.0579	6.673	4.56066	1.74208	1.01495	0	0	-0.129677	0.200237	20.0237	0	0
Chile	2017	0	0	1.00058	0.981475	1.3255	0.809456	1.00166	0.406282	21.1177	24.1	44.1018	-72.17	23.9962	-5.30262	-3.99638	-3.68	-2.63688	-0.13042	0	-1.22652	-0.0062678	-2.63062	1.21957	-138.4	1.3577	1.89647	87.49	56.0262	7.257	4.82819	1.71657	1.00087	0	0	-0.0679451	0.219625	21.9625	0	0
Chile	2018	1	0	1.02594	0.940261	1.30045	0.907178	0.958202	0.41277	21.0607	25.5	46.3151	-71.24	24.1615	-5.83708	-3.99638	-3.61	-3.14131	-0.127173	0	-1.19779	-0.0113333	-3.12997	1.3038	-73.6972	3.99003	2.68461	87.564	58.1771	7.623	1.5902	1.72606	1.00611	1	0	-0.0496241	0.225379	22.5379	0	0
Chile	2019	0	0	0.981486	0.924217	1.15849	0.863499	0.978931	-0.0161216	19.7832	25.3	45.389	-72.6	24.3269	-2.56889	-3.99638	-3.79	-1.0222	-0.129622	0	-1.3895	-0.0153159	-1.00688	1.3338	-82.9914	0.634368	4.87956	87.643	57.6118	7.493	2.56779	1.43478	0.845273	0	0	-0.136816	0.197995	19.7995	0	0
Chile	2020	0	1	0.991941	0.930162	0.948648	0.705045	1.10614	0.0440445	20.2852	26.7	48.7831	-70.95	24.4922	-5.48717	-3.99638	-3.68	-2.67627	-0.146537	0	-1.52743	-0.00668097	-2.66959	1.30233	-74.3635	-6.14347	4.5061	87.727	58.1829	10.934	9.66572	1.3451	0.79575	0	1	-0.0459879	0.226521	22.6521	0	0
China	2002	1	0	-1.59419	-0.51703	-0.582766	-0.123097	-0.557898	-0.327627	15.3987	27	17.6186	-82.18	19.3565	-1.9563	-19.6303	-10.14	-1.26668	-0.756687	0	-5.27501	-1.205	-0.061679	0.709704	-4904.58	9.24339	3.56241	38.425	42.1944	4.24	0.642696	-2.44919	-1.29931	1	0	0.373678	0.358324	35.8324	0	0
China	2003	1	0	-1.51243	-0.553044	-0.392049	-0.147587	-0.395265	-0.565358	13.0776	23.9	15.0371	-84.48	19.6079	-2.01791	-19.653	-10.51	-1.2959	-0.696945	0	-5.62346	-1.22304	-0.072858	0.796249	-5611.67	10.1182	3.4385	39.776	51.0775	4.58	2.64268	-2.37927	-1.26071	1	0	0.419574	0.372738	37.2738	0	0
China	2004	1	0	-1.46246	-0.585469	-0.346229	-0.10993	-0.565062	-0.390681	11.0177	20.2	16.2232	-86.33	19.8594	-4.72488	-19.6758	-10.87	-2.8484	-0.649323	0	-5.79762	-2.68975	-0.158653	0.831697	-6471.76	10.1314	3.43299	41.144	58.6403	4.49	6.99019	-2.32768	-1.23222	1	0	0.5707	0.420202	42.0202	0	0
China	2005	1	0	-1.50079	-0.650173	-0.183769	-0.14064	-0.617888	-0.501757	9.71945	17.4	16.1593	-87.59	20.1109	-5.10277	-19.6985	-10.75	-3.24671	-0.611745	0	-5.9703	-2.8637	-0.383016	0.811827	-7329.09	11.4582	4.49219	42.522	61.3601	4.52	3.74872	-2.37687	-1.25938	1	0	0.619634	0.43557	43.557	1	0
China	2006	1	0	-1.74897	-0.699893	-0.258387	0.035788	-0.518888	-0.54003	8.81304	16.4	15.5566	-88.51	20.3624	-5.5212	-20.1927	-10.44	-3.56281	-0.562604	0	-5.74706	-2.80089	-0.761923	0.826459	-8081	12.6747	4.445	43.868	63.5696	4.43	4.01946	-2.44309	-1.29594	1	0	0.637527	0.44119	44.119	1	0
China	2007	1	0	-1.72125	-0.597398	-0.233363	0.165997	-0.599235	-0.500554	7.66249	14.9	15.2658	-89.53	20.6139	-6.32788	-20.2176	-9.83	-3.92526	-0.519506	0	-5.06121	-2.53838	-1.38689	0.830018	-8648.59	14.15	4.33538	45.199	61.2665	4.35	7.91366	-2.32971	-1.23334	1	0	0.621981	0.436308	43.6308	1	0
China	2008	1	0	-1.6995	-0.479175	-0.218393	0.165779	-0.526308	-0.493088	6.96661	14.1	17.6408	-89.74	20.8654	-9.64841	-20.4806	-9.21	-5.69031	-0.508565	0	-4.17967	-4.22544	-1.46488	0.795358	-8832	9.67025	3.67521	46.539	56.7111	4.59	7.85659	-2.22604	-1.1761	1	0	0.695548	0.459413	45.9413	1	0
China	2009	1	0	-1.70117	-0.463214	-0.298094	0.093242	-0.519457	-0.451781	6.2754	13.4	17.8109	-90.33	21.1168	-3.91782	-20.7331	-8.98	-2.29463	-0.507955	0	-4.18563	-1.67546	-0.619168	1.27268	-9412.97	9.4027	2.52539	47.88	44.4198	4.72	-0.0819669	-2.27141	-1.20115	1	0	0.490341	0.394964	39.4964	0	0
China	2010	1	0	-1.68055	-0.472602	-0.320955	0.0918449	-0.57001	-0.657061	5.49573	12.3	18.793	-90.99	21.3683	-6.28673	-20.8621	-8.96	-3.89428	-0.496085	0	-3.99595	-2.47644	-1.41784	1.4101	-10233.2	10.5963	3.93542	49.226	49.8541	4.53	6.92846	-2.38672	-1.26482	1	0	0.598877	0.429051	42.9051	1	0
China	2011	1	0	-1.63761	-0.45381	-0.259136	0.0836087	-0.514728	-0.602055	4.88014	11.3	16.8361	-91.59	21.5746	-7.6852	-21.1525	-8.78	-4.9018	-0.494834	0	-3.7011	-3.1615	-1.7403	1.34043	-11189.4	9.46134	3.65069	50.511	49.9458	4.55	8.01606	-2.28577	-1.20908	1	0	0.670867	0.451661	45.1661	1	0
China	2012	1	0	-1.63794	-0.545384	-0.284333	0.0153678	-0.438276	-0.538782	4.4587	11.5	20.098	-91.28	21.7809	-4.08849	-21.2876	-8.43	-2.46961	-0.492125	0	-3.48275	-1.9833	-0.486311	1.37424	-11511.4	7.85617	2.78099	51.765	47.4802	4.58	2.40518	-2.31178	-1.22344	1	0	0.532347	0.408156	40.8156	0	0
China	2013	1	0	-1.63152	-0.525889	-0.331608	-0.00512069	-0.355888	-0.54379	4.09623	11.5	20.1335	-91.1	21.9872	-2.98307	-21.4298	-8.08	-1.84083	-0.495312	0	-3.40008	-1.47249	-0.368341	0.748447	-12021.9	7.77872	2.98599	53.013	45.916	4.6	2.29799	-2.30073	-1.21734	1	0	0.500955	0.398297	39.8297	0	0
China	2014	1	0	-1.61678	-0.396053	-0.331334	0.354852	-0.33772	-0.522584	4.01087	11.9	22.0557	-90.54	22.1935	-2.31013	-21.0957	-7.71	-1.41386	-0.490697	0	-3.21225	-1.1745	-0.239364	0.753853	-12144.6	7.4619	2.51156	54.259	44.0685	4.63	1.09109	-2.05601	-1.08221	1	0	0.462941	0.386358	38.6358	0	0
China	2015	1	0	-1.66078	-0.408456	-0.354117	0.417423	-0.299922	-0.55256	3.94416	12.2	23.8649	-89.94	22.3998	-1.17477	-21.0388	-7.24	-0.705546	-0.500566	0	-3.11477	-0.551469	-0.154077	0.692695	-11904.4	6.97878	2.14957	55.5	38.6972	4.65	0.137261	-2.0614	-1.08519	1	0	0.391505	0.363923	36.3923	0	0
China	2016	1	0	-1.55935	-0.323969	-0.314002	0.356384	-0.268094	-0.502221	3.91926	12.6	25.052	-89.1	22.6305	-1.05247	-21.4732	-6.74	-0.602689	-0.501559	0	-3.17255	-0.468471	-0.134217	0.571471	-11827.6	6.77556	1.52539	56.736	36.1772	4.56	1.47744	-1.95096	-1.02421	1	0	0.370849	0.357436	35.7436	0	0
China	2017	1	0	-1.50353	-0.255178	-0.179426	0.416876	-0.291626	-0.232558	3.93293	13.1	25.0387	-88.6	22.8307	-1.31424	-21.1959	-6.54	-0.722467	-0.490209	0	-3.07268	-0.582954	-0.139513	0.643157	-12020.6	6.89127	1.32469	57.96	36.9509	4.47	4.14602	-1.69589	-0.883368	1	0	0.377259	0.359449	35.9449	0	0
China	2018	1	0	-1.45939	-0.186479	-0.228586	0.496678	-0.286848	-0.298572	3.85644	13.5	25.8127	-88.16	23.0309	-1.42518	-21.0782	-6.42	-0.834345	-0.482528	0	-2.97454	-0.704282	-0.130064	0.652771	-12615.2	6.75672	1.66362	59.152	36.8944	4.31	3.4679	-1.65945	-0.863246	1	0	0.400456	0.366734	36.6734	0	0
China	2019	1	0	-1.62691	-0.261682	-0.30432	0.544863	-0.312614	-0.259781	3.6396	14.3	26.8897	-87.69	23.2311	-1.26691	-21.4057	-6.33	-0.722276	-0.47999	0	-3.06623	-0.554702	-0.167574	0.643223	-12935.1	6.0685	1.28549	60.308	35.1994	4.56	1.31551	-1.77838	-0.928916	1	0	0.407766	0.36903	36.903	0	0
China	2020	0	0	-1.65636	-0.102505	-0.202643	0.643972	-0.0710281	-0.474128	3.54006	14.9	28.1119	-87.45	23.4313	-0.863775	-20.2097	-6.4	-0.475069	-0.495243	0	-3.01643	-0.361834	-0.113235	0.627133	-13157.4	2.34019	1.68771	61.428	34.039	5	0.530001	-1.61605	-0.839285	0	0	0.405245	0.368238	36.8238	0	0
Colombia	2002	0	0	-0.416357	-0.749073	-0.0232631	-0.487908	-0.264331	-1.95671	13.4895	28.6	79.1101	-75.28	56.1964	-3.95007	-0.407984	-2.8	-3.39797	-0.402591	0	-1.2001	-3.21547	-0.182498	0.842277	-237.584	2.50398	2.17845	74.797	32.9826	14.481	5.96819	-2.48474	-1.31894	0	0	0.102532	0.273166	27.3166	0	0
Colombia	2003	1	0	-0.429242	-0.739118	-0.126519	-0.221861	-0.204286	-2.37603	14.1082	30.6	82.0425	-74.34	56.0227	-4.56303	-0.431416	-2.76	-3.92808	-0.358171	0	-1.28984	-3.42427	-0.503804	0.892322	-252.425	3.91827	1.81784	75.211	36.5162	13.221	6.82901	-2.57036	-1.36622	1	0	0.137187	0.28405	28.405	0	0
Colombia	2004	1	0	-0.318785	-0.6952	-0.0864163	-0.215897	-0.140631	-2.27123	12.2246	29	82.2901	-75.16	55.849	-5.92814	-0.454848	-2.63	-4.71136	-0.318526	0	-1.09534	-4.01871	-0.692653	0.877635	-252.59	5.33302	2.66083	75.62	35.8634	13.717	7.28303	-2.40736	-1.27622	1	0	0.170379	0.294474	29.4474	0	0
Colombia	2005	1	0	-0.322521	-0.633082	-0.0163638	-0.197672	-0.145389	-2.05794	11.8492	28.9	83.592	-76.23	55.6752	-6.26116	-0.478281	-2.64	-5.22645	-0.282741	0	-0.945088	-4.55323	-0.673222	0.887412	-243.611	4.82876	7.02979	76.024	37.4227	11.062	4.7532	-2.24934	-1.18896	1	0	0.191369	0.301067	30.1067	0	0
Colombia	2006	1	0	-0.172737	-0.508388	0.106226	-0.191516	-0.175138	-1.9048	12.525	30.6	80.7662	-75.3	55.5015	-7.29063	-0.501713	-2.6	-6.10457	-0.26433	0	-0.899281	-5.03865	-1.06592	0.817411	-240.824	6.71687	4.17239	76.423	39.6414	11.091	5.80766	-2.00962	-1.0566	1	0	0.234182	0.314513	31.4513	0	0
Colombia	2007	1	0	-0.165322	-0.43298	0.284263	-0.0502214	-0.27916	-1.80653	12.5573	31	81.5675	-74.4	55.3277	-6.69977	-0.525146	-2.42	-5.28926	-0.240637	0	-0.762694	-4.38469	-0.904575	0.773799	-247.093	6.73819	4.30868	76.816	37.0989	11.204	5.20203	-1.82169	-0.95283	1	0	0.184145	0.298798	29.8798	0	0
Colombia	2008	0	0	-0.165923	-0.381236	0.27239	-0.0256232	-0.261543	-1.85346	12.3615	30.8	83.936	-74.84	55.154	-8.78823	-0.548718	-2.47	-6.70878	-0.239388	0	-0.686143	-6.39138	-0.317399	0.734368	-243.677	3.28345	4.35628	77.204	39.1676	11.273	7.67738	-1.80611	-0.944229	0	0	0.286794	0.331036	33.1037	0	0
Colombia	2009	0	0	-0.149578	-0.367778	0.0882817	-0.300558	-0.337013	-1.83235	11.9728	31.4	73.113	-77.14	54.9802	-4.85703	-0.642916	-2.54	-3.9664	-0.253236	0	-0.759474	-3.56478	-0.401616	0.704006	-242.533	1.13965	3.45627	77.587	35.1561	12.066	4.06423	-2.0305	-1.06812	0	0	0.101804	0.272937	27.2937	0	0
Colombia	2010	1	0	-0.132357	-0.271386	0.157254	-0.123824	-0.423333	-1.53718	13.3685	30.6	68.5385	-75.76	54.8065	-6.70109	-0.73744	-2.39	-5.3445	-0.241562	0	-0.656697	-4.74812	-0.596374	0.695728	-247.869	4.49466	2.24434	77.964	34.2646	11.153	3.80486	-1.77534	-0.927239	1	0	0.171598	0.294857	29.4857	0	0
Colombia	2011	1	0	-0.0597142	-0.217361	0.279601	-0.050427	-0.317528	-1.28466	12.5967	29.6	79.7564	-74.73	54.6851	-9.86049	-0.831964	-2.29	-8.18723	-0.217003	0	-0.64262	-7.5659	-0.621323	0.663907	-260.312	6.94789	4.3727	78.335	39.4704	10.288	6.3868	-1.4732	-0.760409	1	0	0.346394	0.349755	34.9755	0	0
Colombia	2012	1	0	-0.0639913	-0.325919	0.326595	-0.00116499	-0.422298	-1.40181	13.6321	29.6	76.7947	-73.41	54.5638	-8.29683	-0.926488	-2.13	-7.02086	-0.201373	0	-0.607054	-6.48058	-0.540277	0.628107	-255.611	3.91264	4.05728	78.701	38.8352	9.959	3.61666	-1.57177	-0.814836	1	0	0.266983	0.324815	32.4815	0	0
Colombia	2013	1	0	-0.0813083	-0.388269	0.339824	0.0531518	-0.441208	-1.29197	15.0138	32	61.6583	-74.64	54.4425	-7.38434	-1.02101	-2.66	-6.29681	-0.183246	0	-0.673492	-6.02791	-0.268899	0.828161	-251.013	5.13399	4.24252	79.061	37.9866	9.246	1.90768	-1.53751	-0.795917	1	0	0.234705	0.314677	31.4677	0	0
Colombia	2014	1	0	-0.0433438	-0.252292	0.444412	-0.135854	-0.39751	-1.11459	15.1302	32.1	65.0719	-75.04	54.3211	-6.53058	-1.11554	-2.58	-5.49902	-0.171181	0	-0.720186	-5.3031	-0.195911	0.81284	-254.459	4.49903	4.24107	79.415	37.4875	8.799	2.23563	-1.39949	-0.71971	1	0	0.191606	0.301141	30.1141	0	0
Colombia	2015	0	0	0.00404632	-0.247236	0.40772	-0.0937391	-0.352602	-1.07266	14.3954	31.1	58.8416	-75.65	54.1998	-3.70588	-1.21006	-2.53	-2.90241	-0.16725	0	-0.963147	-2.77217	-0.130249	0.829241	-247.976	2.9559	3.9594	79.764	38.3608	8.572	2.44933	-1.33848	-0.686019	0	0	0.0381787	0.252955	25.2955	0	0
Colombia	2016	0	0	0.122126	-0.266068	0.339025	-0.0369666	-0.384618	-0.887164	13.535	30.5	63.0104	-76.62	54.0419	-3.09948	-1.30458	-2.57	-2.26985	-0.165603	0	-1.06157	-2.05504	-0.214804	0.818928	-269.025	2.08738	4.90165	80.108	36.2027	8.922	5.14833	-1.23632	-0.629612	0	0	0.0079505	0.243461	24.3461	0	0
Colombia	2017	0	0	0.112732	-0.366633	0.257447	-0.140821	-0.42983	-0.779458	13.0688	32.2	74.4766	-74.14	53.8439	-3.72823	-1.28502	-2.43	-2.86216	-0.167594	0	-0.915336	-2.6974	-0.164764	0.616811	-292.452	1.35936	4.39318	80.446	35.2829	9.086	5.13374	-1.34597	-0.690156	0	0	0.0503907	0.25679	25.679	0	0
Colombia	2018	0	0	0.172213	-0.383742	0.224889	-0.13937	-0.34044	-0.806942	12.3749	30.4	73.2358	-74.71	53.6642	-4.94026	-1.26545	-2.28	-4.0584	-0.165286	0	-0.944714	-3.93766	-0.120742	0.664763	-292.118	2.56432	3.38084	80.778	36.5348	9.36	4.63058	-1.31698	-0.674147	0	0	0.110484	0.275664	27.5663	0	0
Colombia	2019	0	0	0.204583	-0.391184	0.317911	0.0327151	-0.283616	-0.979486	12.2096	31.5	70.197	-77.06	53.4846	-4.30433	-1.29845	-2.42	-3.53508	-0.160496	0	-1.04561	-3.37636	-0.158728	0.613969	-297.021	3.18686	4.33058	81.104	37.5585	10.28	4.00262	-1.23181	-0.627123	0	0	0.0828688	0.266991	26.699	0	0
Colombia	2020	0	1	0.143006	-0.491403	0.225666	0.00847532	-0.252499	-0.70115	13.2546	32	65.2771	-76	53.305	-2.55119	-1.33379	-2.44	-1.92786	-0.172185	0	-1.17483	-1.67839	-0.249464	0.5613	-294.93	-7.18591	2.75889	81.425	34.0556	15.983	1.48172	-1.22964	-0.625925	0	1	-0.0103785	0.237705	23.7705	0	0
Costa Rica	2002	1	0	1.11082	0.554997	0.441433	0.306561	0.444572	1.06869	8.69841	32.5	97.8013	-55.19	56.0128	-0.981119	-2.06931	-2.46	-0.018845	-0.157248	0	-0.703345	-0.0178745	-0.000970423	2.50917	-23.8565	3.41688	4.36203	61.753	80.4139	6.396	9.78689	0.960942	0.583634	1	0	-0.0995603	0.209696	20.9696	0	0
Costa Rica	2003	1	0	0.964285	0.526867	0.623164	0.211419	0.516546	0.595757	9.1947	33.3	99.1939	-56.56	56.0402	-1.02045	-2.06931	-2.52	-0.0261636	-0.144785	0	-0.739769	-0.0246867	-0.00147688	2.74781	-21.8431	4.31718	4.48354	63.08	83.3277	6.654	10.6482	0.757468	0.471284	1	0	-0.0955776	0.210946	21.0946	0	0
Costa Rica	2004	1	0	0.971274	0.502903	0.546658	0.21229	0.284918	0.631577	12.8992	39.2	96.2348	-48.06	56.0676	-1.00111	-2.06931	-2.86	-0.0432149	-0.139948	0	-0.735304	-0.0396843	-0.00353057	2.64618	-19.6596	4.4246	5.82313	64.388	85.2565	6.445	13.3503	0.631615	0.401792	1	0	-0.066222	0.220166	22.0166	0	0
Costa Rica	2005	1	0	0.816958	0.497264	0.594157	0.149778	0.365192	0.708228	16.501	41.7	95.5844	-46.99	56.095	-1.12143	-2.06931	-2.75	-0.456865	-0.131694	-0.360638	-0.756348	-0.0850926	-0.0111348	2.64618	-17.2152	3.97667	7.62844	65.672	89.2227	6.749	13.0133	0.620787	0.395814	1	0	-0.0404976	0.228245	22.8245	0	0
Costa Rica	2006	1	0	0.915723	0.389714	0.382123	0.0309586	0.378651	0.73605	17.4009	42.4	92.7713	-47.42	56.1224	-1.49198	-2.06931	-2.79	-0.19696	-0.127085	-0.0417485	-0.729432	-0.112285	-0.0429269	2.44283	-17.3137	7.3267	7.9285	66.935	89.8146	5.926	12.9843	0.475698	0.315701	1	0	-0.0481509	0.225842	22.5842	0	0
Costa Rica	2007	1	0	0.935347	0.354345	0.450157	0.211472	0.457115	0.582773	17.2998	41.2	91.8558	-49.9	56.1497	-1.6384	-2.06931	-2.72	-0.20419	-0.109669	0	-0.747117	-0.140197	-0.063993	2.49572	-18.133	8.21513	8.33743	68.174	86.4566	4.557	10.5168	0.551223	0.357403	1	0	-0.05318	0.224262	22.4262	0	0
Costa Rica	2008	1	0	0.96676	0.453689	0.566188	0.270572	0.493209	0.359765	16.3279	40.7	92.7209	-50.1	56.1771	-1.48655	-2.06931	-2.61	-0.143358	-0.10827	0	-0.667987	-0.138507	-0.00485153	2.36827	-17.972	4.73817	7.90901	69.39	86.4015	4.934	11.4238	0.614082	0.392111	1	0	-0.063612	0.220986	22.0986	0	0
Costa Rica	2009	0	1	1.00583	0.578809	0.518184	0.321134	0.71547	0.58706	15.6692	40.7	95.0621	-48.8	56.2045	-1.23015	-2.06931	-2.66	-0.0406935	-0.104621	0	-0.668512	-0.0349275	-0.00576602	2.52018	-17.4589	-0.873456	5.25151	70.575	69.7593	7.824	9.70133	0.876111	0.536794	0	1	-0.0682662	0.219524	21.9524	0	0
Costa Rica	2010	1	0	1.03989	0.535761	0.586027	0.298929	0.664392	0.691537	15.6509	40.4	92.5106	-48.37	56.2319	-1.62717	-2.06931	-2.54	-0.0131256	-0.1185	0	-0.557109	0	-0.0131256	2.46458	-17.2727	5.36034	5.06371	71.736	67.5121	7.171	6.62884	0.918874	0.560406	1	0	-0.0747788	0.217479	21.7479	0	0
Costa Rica	2011	1	0	1.05386	0.443259	0.596261	0.283399	0.593174	0.508276	13.8553	38	90.527	-49.57	56.5524	-1.26385	-2.06931	-2.45	-0.0262228	-0.109011	0	-0.536045	0	-0.0262228	2.39655	-17.2535	4.40316	6.39173	72.868	68.6391	9.518	4.59323	0.773976	0.480399	1	0	-0.0898344	0.21275	21.275	0	0
Costa Rica	2012	1	0	1.08822	0.528911	0.743631	0.474399	0.570754	0.638402	13.3642	38.1	90.942	-48.06	56.8729	-1.24258	-2.06931	-2.42	-0.076268	-0.117096	0	-0.505663	-0.0570419	-0.0192261	2.27606	-18.0358	4.88259	5.70866	73.946	67.0485	9.11	4.73363	1.0334	0.623645	1	0	-0.0865612	0.213778	21.3778	0	0
Costa Rica	2013	0	0	1.07846	0.563855	0.747274	0.455911	0.577441	0.677918	13.3859	37.8	87.4663	-47.82	57.1935	-1.34123	-2.18241	-2.49	-0.0536513	-0.116564	0	-0.511978	-0.050924	-0.0027273	2.42539	-19.0502	2.49477	6.29128	74.97	64.0664	8.218	4.59021	1.05776	0.637095	0	0	-0.0870877	0.213613	21.3613	0	0
Costa Rica	2014	1	0	1.13834	0.583375	0.656426	0.362442	0.725378	0.577418	12.974	37.6	88.9891	-47.97	57.514	-1.38767	-2.42804	-2.44	-0.0477731	-0.113926	0	-0.528314	-0.0459362	-0.00183692	2.30278	-13.148	3.54211	6.23294	75.941	65.1912	8.499	6.20692	1.02479	0.618888	1	0	-0.0853065	0.214172	21.4172	0	0
Costa Rica	2015	1	0	1.15161	0.492799	0.664466	0.306554	0.687056	0.669974	12.8742	38.3	98.3894	-47.42	57.8345	-1.13397	-2.82656	-2.29	-0.0188924	-0.115194	0	-0.484975	-0.0177567	-0.00113572	2.39631	-14.6913	3.65208	5.23639	76.862	60.7536	8.415	3.95522	0.99224	0.600916	1	0	-0.0867116	0.213731	21.3731	0	0
Costa Rica	2016	1	0	1.11791	0.431042	0.52648	0.283875	0.678311	0.648553	10.2311	34.1	97.2188	-52.31	58.1551	-1.23322	-2.58647	-2.17	-0.0155307	-0.109056	0	-0.514519	-0.0138221	-0.00170859	2.38403	-13.4173	4.20432	4.45296	77.735	62.1785	8.085	1.95876	0.858096	0.526847	1	0	-0.100617	0.209364	20.9364	0	0
Costa Rica	2017	1	0	1.12176	0.428869	0.433504	0.222522	0.432392	0.597007	9.67316	33.3	98.7375	-54.91	58.4757	-1.13384	-2.15929	-2.04	-0.00665796	-0.111348	0	-0.538863	-0.0050387	-0.00161925	2.37882	-12.3793	4.1577	4.83328	78.56	65.072	7.729	2.85888	0.661163	0.418108	1	0	-0.107122	0.207321	20.7321	0	0
Costa Rica	2018	0	0	1.11901	0.467835	0.476173	0.352706	0.501138	0.453386	9.43278	33.1	97.7038	-56.76	58.7961	-0.945537	-2.70235	-1.96	-0.00769697	-0.11643	0	-0.55509	-0.00769697	0	2.32052	-12.8906	2.6159	4.82944	79.34	66.9453	9.01	2.19248	0.724805	0.453249	0	0	-0.114408	0.205032	20.5032	0	0
Costa Rica	2019	0	0	1.09427	0.529464	0.544662	0.347661	0.626857	0.43032	8.61642	33.4	98.3323	-51.55	59.1167	-0.75969	-2.77711	-2.03	-0.00560359	-0.11789	0	-0.554614	-0.00560359	0	2.34234	-12.7823	2.41751	4.22094	80.076	65.7605	10.807	2.56679	0.815268	0.503199	0	0	-0.108756	0.206808	20.6807	0	0
Costa Rica	2020	0	1	1.1203	0.498832	0.47758	0.1965	0.661411	0.746818	9.37392	36.4	98.9419	-46.97	59.4373	-0.904748	-2.77529	-2.03	-0.0029369	-0.124504	0	-0.558689	-0.0029369	0	1.73154	-11.2988	-4.27335	3.37044	80.771	60.1399	16.432	0.772593	0.860777	0.528327	0	1	-0.0907042	0.212477	21.2477	0	0
Cote d'Ivoire	2002	0	1	-1.06706	-1.32923	-0.420426	-0.941149	-0.801531	-1.91973	61.9506	65.3	32.6596	-37.85	15.3103	-2.45891	-1.90651	-4.33	-0.668095	-4.73747	0	-1.26956	-0.668095	0	0.187926	-28.788	-2.73053	1.17744	43.983	55.9019	5.474	4.58214	-3.64684	-1.96061	0	1	-0.0886719	0.213115	21.3115	0	0
Cote d'Ivoire	2003	0	1	-1.15453	-1.35852	-0.751793	-1.1345	-1.01384	-1.80326	66.8415	70.3	36.0173	-32.5	14.9553	-2.64884	-1.94305	-4.15	-0.795982	-4.70282	0	-0.855203	-0.781836	-0.014146	0.134715	-28.5936	-4.72587	0.778244	44.399	53.2601	5.805	3.27812	-3.98911	-2.1496	0	1	-0.0845623	0.214406	21.4406	0	0
Cote d'Ivoire	2004	0	0	-1.21965	-1.42453	-1.03202	-1.2796	-1.24132	-2.11492	74.7571	75.4	31.7278	-24.93	14.6003	-2.49322	-1.97959	-5.78	-1.24916	-4.31302	0	-0.815988	-1.24916	0	0.128214	-30.4989	3.18504	1.20363	44.817	58.1183	5.883	-2.50336	-4.47941	-2.42032	0	0	0.01149	0.244573	24.4573	0	0
Cote d'Ivoire	2005	0	0	-1.29462	-1.53937	-0.955394	-1.34959	-1.24979	-2.25953	74.5748	77.9	25.228	-25.39	14.2453	-3.71198	-2.01614	-5.88	-2.74303	-3.8073	0	-0.832181	-2.74303	0	0.133254	-29.2452	0.996066	1.45218	45.234	62.8209	5.999	1.21513	-4.62371	-2.5	0	0	0.0986766	0.271955	27.1955	0	0
Cote d'Ivoire	2006	0	0	-1.27868	-1.4629	-0.928464	-1.16378	-1.20753	-1.86187	78.1468	74.8	26.702	-21.45	13.8903	-5.60158	-1.96015	-5.69	-4.95607	-3.69539	0	-0.81715	-4.94651	-0.00956166	0.127383	-31.9825	2.81558	1.38823	45.652	63.6904	6.009	1.35954	-4.29776	-2.32002	0	0	0.219822	0.310003	31.0003	0	0
Cote d'Ivoire	2007	0	0	-1.20209	-1.47172	-0.881732	-1.21891	-1.09507	-1.83957	74.8821	76.3	31.9126	-24.25	13.5353	-4.98387	-1.9028	-6.02	-3.77933	-3.55599	0	-0.745165	-3.77933	0	0.131677	-33.1258	1.10143	1.54312	46.071	61.4309	6.272	3.08855	-4.213	-2.27322	0	0	0.171096	0.2947	29.47	0	0
Cote d'Ivoire	2008	1	0	-1.16756	-1.43818	-0.929747	-1.25272	-1.11905	-1.80407	74.2927	74.2	32.7241	-24.62	13.1804	-5.562	-1.84613	-5.9	-4.2421	-3.27684	0	-0.741371	-4.13346	-0.108633	0.128576	-35.0393	4.78267	1.37442	46.491	61.9406	6.379	5.37293	-4.21625	-2.27501	1	0	0.192985	0.301574	30.1574	0	0
Cote d'Ivoire	2009	1	0	-1.06438	-1.25304	-0.972752	-1.12652	-1.11739	-1.32086	75.7724	73.7	36.2971	-22.72	12.8254	-3.87323	-1.79048	-5.24	-2.27193	-3.08445	0	-0.710565	-2.02819	-0.24374	0.123691	-33.9755	3.60332	1.17339	46.91	66.6729	6.571	1.20778	-3.84414	-2.06955	1	0	0.0638378	0.261014	26.1014	0	0
Cote d'Ivoire	2010	1	0	-1.0484	-1.236	-0.926223	-1.29745	-1.17285	-1.58389	70.2733	75.4	27.1249	-28.41	12.4704	-4.33014	-1.73483	-4.55	-1.68804	-2.87016	0	-0.756272	-1.58802	-0.100027	0.108886	-36.8769	6.84805	1.02606	47.33	67.4729	6.618	1.51622	-4.01876	-2.16597	1	0	0.0081127	0.243512	24.3512	0	0
Cote d'Ivoire	2011	0	1	-1.08188	-1.28268	-0.889401	-1.18076	-1.03099	-1.40581	73.2584	79.1	29.0867	-25.67	12.1154	-5.5324	-1.67918	-5.45	-3.08423	-2.9956	0	-0.74738	-2.33458	-0.749653	0.0441701	-37.5781	-5.37045	0.822954	47.751	64.7159	7.135	5.70932	-3.84906	-2.07227	0	1	0.115395	0.277206	27.7206	0	0
Cote d'Ivoire	2012	1	0	-0.77775	-1.09417	-0.776178	-1.10815	-0.838509	-1.26346	68.9581	74.9	25.4989	-30.05	11.7604	-5.36757	-1.62421	-5.39	-2.0522	-2.57691	0	-0.963499	-1.4825	-0.569695	0.20411	-44.0548	7.62041	0.909737	48.172	70.3011	7.223	-0.404098	-3.39819	-1.82332	1	0	0.0643864	0.261186	26.1186	0	0
Cote d'Ivoire	2013	1	0	-0.751274	-0.914695	-0.75344	-0.938218	-0.740123	-1.04872	65.6066	72.2	20.9918	-33.76	11.4054	-4.15504	-1.56822	-5.07	-1.52798	-2.41514	0	-0.940693	-1.12258	-0.405404	0.197311	-43.6847	10.7602	0.953204	48.593	58.3527	4.255	2.87673	-3.0851	-1.65044	1	0	0.0011305	0.241319	24.1319	0	0
Cote d'Ivoire	2014	1	0	-0.508161	-0.593253	-0.618877	-0.857292	-0.419228	-1.03716	66.8501	71.9	23.0992	-32.32	11.0504	-3.41936	-1.51223	-4.7	-0.754629	-1.57419	0	-0.646249	-0.479875	-0.274754	0.126035	-47.0738	9.372	0.899529	49.014	53.6804	3.285	4.40733	-2.59006	-1.37709	1	0	-0.0502353	0.225187	22.5187	0	0
Cote d'Ivoire	2015	1	0	-0.407788	-0.651472	-0.554927	-0.747541	-0.46236	-0.835078	64.5116	64.5	15.5246	-35.04	10.6954	-3.0726	-1.51223	-3.89	-0.585771	-1.46483	0	-0.761306	-0.302124	-0.283647	0.117599	-46.7614	7.19495	1.07914	49.444	52.7129	2.579	4.77568	-2.42157	-1.28406	1	0	-0.108391	0.206922	20.6922	0	0
Cote d'Ivoire	2016	1	0	-0.310145	-0.663035	-0.422827	-0.736379	-0.555475	-0.909239	62.9143	64	16.0333	-36.82	10.3404	-3.23053	-1.51223	-3.81	-0.713183	-1.34271	0	-0.734505	-0.273746	-0.439438	0.102326	-48.7272	7.17276	1.19376	49.881	47.5656	1.896	-1.17983	-2.38273	-1.26262	1	0	-0.110338	0.206311	20.6311	0	0
Cote d'Ivoire	2017	1	0	-0.284559	-0.650804	-0.40688	-0.812218	-0.550499	-1.09112	60.175	62.5	19.0085	-39.67	9.98544	-3.38877	-1.51223	-3.66	-0.877076	-1.21834	0	-0.789429	-0.560121	-0.316954	0.111904	-49.224	7.41076	1.85673	50.326	48.6625	3.272	-1.04168	-2.46761	-1.30948	1	0	-0.105753	0.207751	20.7751	0	0
Cote d'Ivoire	2018	1	0	-0.249501	-0.60271	-0.254713	-0.64745	-0.526207	-0.898	57.0118	60.5	29.4464	-41.32	9.63044	-3.10997	-1.51223	-3.27	-1.03736	-1.16623	0	-0.715351	-0.671898	-0.365459	0.089759	-50.9561	4.84315	1.05999	50.779	46.0375	2.85	1.68198	-2.18805	-1.15512	1	0	-0.117559	0.204043	20.4043	0	0
Cote d'Ivoire	2019	1	0	-0.249043	-0.610496	-0.300067	-0.559172	-0.563737	-1.0365	58.9977	61.1	32.754	-39.01	9.27547	-2.95827	-1.51223	-3.2	-1.08408	-1.08103	0	-0.775131	-0.622824	-0.461256	0.100843	-57.7882	6.72137	1.40583	51.239	44.6604	2.401	1.98335	-2.24836	-1.18842	1	0	-0.111214	0.206036	20.6036	0	0
Cote d'Ivoire	2020	0	0	-0.530299	-0.656909	-0.381348	-0.539149	-0.551727	-1.03322	59.2584	61.8	30.0543	-38.97	8.92047	-2.59164	-1.51223	-3.3	-0.847721	-1.05095	0	-0.777505	-0.300225	-0.547495	0.0778496	-56.7079	0.699729	1.13111	51.706	41.9426	2.584	1.82838	-2.42046	-1.28345	0	0	-0.126906	0.201107	20.1107	0	0
Croatia	2002	1	0	0.556711	-0.144793	0.294281	0.328576	0.225012	0.628808	11.7422	24.6	46.3389	-79.71	33.8389	-0.768647	-1.52122	-4.2	-0.525955	-0.252088	-0.0566545	-1.5349	-0.469301	0	4.31955	-18.5409	5.80333	3.66543	53.81	81.161	15.053	3.8407	0.0558253	0.0838629	1	0	-0.157204	0.191592	19.1592	0	0
Croatia	2003	1	0	0.623684	-0.0459939	0.466213	0.318801	0.258523	0.558496	12.6539	24.8	41.6398	-79.47	33.87	-0.697995	-1.62365	-4.26	-0.486818	-0.26336	-0.0767052	-1.34117	-0.410113	0	4.08521	-20.8553	5.56837	5.23881	53.979	81.4433	13.924	4.3005	0.194859	0.160632	1	0	-0.166646	0.188626	18.8626	0	0
Croatia	2004	1	0	0.658321	0.0412165	0.531916	0.444301	0.23937	0.686754	12.441	26.6	55.223	-78.01	33.9325	-0.662508	-1.60974	-4.09	-0.488992	-0.249841	-0.0784529	-1.12747	-0.410539	0	4.01238	-21.1528	4.17048	3.14124	54.147	81.6444	13.664	3.62413	0.385651	0.26598	1	0	-0.163453	0.189629	18.9629	0	0
Croatia	2005	1	0	0.452612	0.0833476	0.47525	0.455621	0.139555	0.434474	12.8448	26.8	54.4332	-77.02	33.9951	-0.719261	-1.63247	-3.98	-0.549664	-0.248271	-0.0892129	-1.11544	-0.460451	0	3.88698	-20.8988	4.32708	4.03156	54.315	81.4923	12.598	3.11437	0.140305	0.13051	1	0	-0.162246	0.190008	19.0008	0	0
Croatia	2006	1	0	0.481494	-0.048246	0.365195	0.55554	0.0449901	0.560829	12.0128	25.5	51.897	-77.63	34.0576	-0.92569	-1.68264	-3.77	-0.732766	-0.227627	-0.123244	-1.06826	-0.609523	0	3.79704	-21.518	5.08147	6.74854	54.483	83.5059	11.13	3.88062	0.0995963	0.108032	1	0	-0.164891	0.189177	18.9177	0	0
Croatia	2007	1	0	0.517976	0.0384778	0.411397	0.456447	0.059038	0.605397	11.2218	22.7	38.6081	-79.63	34.1201	-0.917436	-1.72671	-3.73	-0.729942	-0.21316	-0.12493	-0.994499	-0.605011	0	3.70778	-24.3744	5.04889	7.83464	54.651	83.2515	9.909	4.28627	0.157776	0.140156	1	0	-0.187841	0.18197	18.197	0	0
Croatia	2008	0	0	0.467807	0.0250067	0.413964	0.572744	-0.0505047	0.573652	11.5414	24.1	46.1648	-78.01	34.1827	-1.10057	-1.75889	-3.57	-0.883794	-0.209958	-0.143487	-0.84953	-0.740307	0	3.47355	-22.9821	1.96859	7.66605	54.819	82.072	8.53	5.52923	0.124125	0.121575	0	0	-0.176403	0.185562	18.5562	0	0
Croatia	2009	0	1	0.486278	0.0438759	0.472276	0.585426	-0.086095	0.612927	12.5502	27.2	56.2489	-76.05	34.2452	-0.778727	-1.82971	-3.71	-0.618835	-0.218937	-0.129887	-0.91978	-0.488948	-4.35854e-07	3.42217	-21.0873	-6.81396	4.92541	54.987	69.6952	9.202	2.985	0.17745	0.15102	0	1	-0.16743	0.18838	18.838	0	0
Croatia	2010	0	1	0.476428	0.080469	0.489483	0.581434	0.0231015	0.608464	13.4838	29.8	63.1098	-74.24	34.3078	-0.917408	-1.81168	-3.72	-0.759551	-0.201563	-0.159153	-0.948478	-0.600397	-1.26738e-06	4.4359	-20.5006	-1.33408	2.61954	55.155	72.6387	11.62	0.920113	0.239558	0.185313	0	1	-0.153968	0.192608	19.2608	0	0
Croatia	2011	0	1	0.521082	0.109396	0.442893	0.502175	0.0277207	0.623747	13.615	27.2	47.6385	-74.6	34.3149	-1.29394	-1.76235	-3.63	-1.09775	-0.194244	-0.229614	-0.924972	-0.868135	-5.24307e-06	3.26962	-21.4837	-0.0977515	1.98554	55.322	77.7657	13.678	1.66935	0.222162	0.175707	0	1	-0.145625	0.195228	19.5228	0	0
Croatia	2012	0	1	0.540831	0.145079	0.353816	0.675028	-0.0254573	0.606891	15.0733	29.4	50.431	-72.18	34.3221	-1.29444	-1.73144	-3.5	-1.0874	-0.188021	-0.264255	-0.975505	-0.823141	-8.3641e-06	3.16896	-20.1413	-2.25375	2.5457	55.506	79.0023	15.935	1.41146	0.2521	0.192238	0	1	-0.138247	0.197545	19.7545	0	0
Croatia	2013	0	1	0.513696	0.177962	0.369633	0.675365	0.10745	0.642668	15.2969	32.8	66.7575	-71.24	34.3292	-1.10848	-1.66819	-3.44	-0.902941	-0.158866	-0.248773	-0.949631	-0.654158	-9.85084e-06	3.4537	-18.923	-0.12545	1.59378	55.706	80.9105	17.251	0.732889	0.333016	0.236917	0	1	-0.132632	0.199309	19.9309	0	0
Croatia	2014	0	1	0.514897	0.218224	0.276575	0.676335	0.200835	0.619112	14.4251	33.6	74.1793	-70.65	34.3364	-0.867349	-1.53823	-3.29	-0.693056	-0.144854	-0.209188	-0.949976	-0.483857	-1.01019e-05	3.80581	-18.3753	-0.55715	5.34747	55.923	85.2092	17.29	0.126545	0.334805	0.237905	0	1	-0.145612	0.195232	19.5232	0	0
Croatia	2015	0	0	0.555478	0.127412	0.237563	0.457353	0.199906	0.586514	15.8357	33.1	67.306	-69.54	34.3435	-0.698157	-1.6468	-3.35	-0.568665	-0.143269	-0.208724	-1.14262	-0.359927	-1.41022e-05	3.99851	-19.4196	2.32318	0.958051	56.155	90.6409	16.175	0.124372	0.179513	0.152159	0	0	-0.150482	0.193703	19.3703	0	0
Croatia	2016	1	0	0.525478	0.339857	0.238647	0.422308	0.155666	0.654191	15.503	31.8	66.8353	-70.55	34.3814	-0.511311	-1.68862	-3.26	-0.419381	-0.118217	-0.19101	-1.17724	-0.228359	-1.19339e-05	4.08609	-19.9749	3.46113	2.99014	56.403	92.1308	13.103	0.0151131	0.256693	0.194774	1	0	-0.165295	0.189051	18.905	0	0
Croatia	2017	0	0	0.479265	0.308923	0.299446	0.535492	0.0596246	0.681906	15.0999	29.8	61.0532	-71.32	34.5152	-0.658339	-1.79303	-3.26	-0.521722	-0.108074	-0.22544	-1.15916	-0.296263	-1.924e-05	4.11547	-21.314	3.28096	3.24	56.667	97.2213	11.208	1.23164	0.27527	0.205032	0	0	-0.168408	0.188073	18.8073	0	0
Croatia	2018	0	0	0.446175	0.30153	0.489818	0.513933	0.0467699	0.793678	16.2752	32.8	72.374	-68.76	34.5599	-0.77306	-1.77376	-3.08	-0.59808	-0.107108	-0.198241	-1.03719	-0.399806	-3.35795e-05	4.14096	-19.7568	2.90468	2.66911	56.947	99.0678	8.432	2.0256	0.383673	0.264888	0	0	-0.156376	0.191852	19.1852	0	0
Croatia	2019	0	0	0.454173	0.348269	0.552518	0.456785	0.0524477	0.685511	16.9264	31.6	66.2484	-68.82	34.6046	-0.619466	-1.78249	-3.01	-0.462903	-0.107184	-0.180019	-1.07995	-0.282885	0	4.11406	-19.7857	3.10044	6.47277	57.242	101.382	6.617	1.98838	0.369665	0.257153	0	0	-0.172022	0.186938	18.6938	0	0
Croatia	2020	0	1	0.579596	0.236186	0.362315	0.424776	0.17711	0.607283	18.1944	32.4	64.9877	-68.25	34.6517	-0.439095	-1.74536	-3.16	-0.305708	-0.113885	-0.174558	-1.05163	-0.13115	0	3.92259	-19.1994	-8.31164	2.5391	57.553	89.5335	7.507	0.80336	0.285565	0.210716	0	1	-0.173776	0.186387	18.6387	0	0
Cyprus	2002	1	0	1.11712	0.989594	1.19339	1.29534	1.12628	0.199421	0.579035	3.2	0	-97.79	18.5991	-0.010947	-21.8846	-3.66	-0.00515048	-0.129345	0	-1.33407	0	-0.00515048	2.71196	-8.06228	3.72297	9.66224	68.694	123.641	3.336	0.296378	1.89093	1.09714	1	0	-0.376075	0.122852	12.2851	0	0
Cyprus	2003	0	0	0.994463	0.938782	1.18173	1.12327	1.19231	0.532276	0.636767	3.2	0	-97.82	18.6124	-0.00789407	-21.7154	-3.88	-0.00353255	-0.134393	0	-1.17906	0	-0.00353255	3.45963	-8.72153	2.6233	6.24271	68.553	114.005	4.153	5.38768	1.89843	1.10128	0	0	-0.381164	0.121253	12.1253	0	0
Cyprus	2004	1	0	0.950031	0.908674	1.21913	1.10752	0.873255	0.380178	0.680243	3.3	0.0192811	-97.52	18.6258	-0.00877046	-21.5462	-3.47	-0.00453569	-0.126526	0	-1.05009	0	-0.00453569	3.62793	-8.66608	5.02627	6.45962	68.41	113.904	4.77	2.7093	1.67913	0.98019	1	0	-0.401897	0.114742	11.4742	0	0
Cyprus	2005	1	0	0.955873	0.877258	1.22013	1.15243	0.89904	0.517519	0.697444	3.4	0.0212523	-97.45	18.6391	-0.00193201	-21.3769	-3.36	-0.00101184	-0.122795	0	-1.05181	-0.00101184	0	3.31932	-8.76554	4.85299	6.30363	68.268	111.917	5.481	2.01953	1.75767	1.02356	1	0	-0.402601	0.114521	11.4521	0	0
Cyprus	2006	1	0	1.05207	1.09397	1.27665	1.26175	1.08556	0.539665	0.609018	3.5	0.0292347	-97.53	18.6524	-0.0018632	-21.2077	-3.34	-0.00107575	-0.115829	0	-1.03474	-0.00107575	0	3.08875	-8.88064	4.71378	9.32557	68.125	109.806	4.593	3.08611	2.06261	1.19193	1	0	-0.401569	0.114845	11.4845	0	0
Cyprus	2007	1	0	1.06666	1.10559	1.3318	1.42117	1.07337	0.537056	1.06389	4.3	0.063642	-96.75	18.6657	-0.00764839	-21.0385	-3.36	-0.00380681	-0.11923	0	-0.953988	-0.00100697	-0.00279984	3.1402	-9.21919	5.09823	9.57346	67.982	111.275	3.946	4.13805	2.16767	1.24994	1	0	-0.402028	0.114701	11.4701	0	0
Cyprus	2008	1	0	1.08403	1.20664	1.368	1.52378	1.19313	0.639004	1.82583	5.7	0.293816	-96.02	18.679	-0.0195935	-20.5769	-3.45	-0.0138144	-0.116775	0	-0.831933	-0.0121056	-0.00170876	3.02058	-9.35963	3.64699	44.546	67.839	112.926	3.756	4.73462	2.37838	1.36629	1	0	-0.397975	0.115973	11.5973	0	0
Cyprus	2009	0	1	1.06803	1.20613	1.36016	1.41438	0.905418	0.390287	2.11894	6.3	0.598274	-95.61	18.6923	-0.0272665	-23.6282	-3.45	-0.0163075	-0.117833	0	-0.883848	-0.00663185	-0.0096756	2.7844	-9.12866	-2.01508	252.668	67.695	102.791	5.594	0.262899	2.09225	1.2083	0	1	-0.395269	0.116823	11.6823	0	0
Cyprus	2010	0	0	1.02339	1.20961	1.42102	1.52651	0.969286	0.452445	2.09317	6.5	1.37392	-95.32	18.7056	-0.0445722	-25.7564	-3.25	-0.0237028	-0.119031	0	-0.887577	-0.00425544	-0.0194473	2.74599	-9.19263	2.28267	125.273	67.551	108.902	6.359	1.88138	2.20756	1.27197	0	0	-0.402656	0.114503	11.4503	0	0
Cyprus	2011	0	0	1.05358	1.06531	1.231	1.55789	0.859248	0.607984	2.13458	7.6	3.62366	-94.8	18.7028	-0.0717518	-28.3077	-3.14	-0.0377653	-0.105018	0	-0.802276	-0.00742098	-0.0303444	2.74699	-8.91234	0.416712	151.737	67.406	110.617	7.942	1.61625	2.09719	1.21103	0	0	-0.407801	0.112887	11.2887	0	0
Cyprus	2012	0	1	1.02202	1.09356	1.12455	1.3836	1.2433	0.635126	2.32664	8.6	5.44901	-94.03	18.7	-0.0727289	-32.7308	-3.06	-0.0378553	-0.105185	0	-0.886812	-0.00831767	-0.0295376	2.57753	-8.31605	-3.44738	289.858	67.261	112.344	12.097	1.67878	2.13501	1.23191	0	1	-0.406651	0.113249	11.3248	0	0
Cyprus	2013	0	1	0.98077	1.02996	0.910857	1.3599	1.23853	0.563347	2.55135	9.7	7.62587	-92.85	18.6972	-0.0449092	-26.5128	-2.83	-0.0223798	-0.10728	0	-0.877873	-0.0025153	-0.0198645	2.71614	-7.59277	-6.58748	108.09	67.137	120.926	16.131	-0.937739	1.93896	1.12366	0	1	-0.405854	0.113499	11.3499	0	0
Cyprus	2014	0	1	1.01995	1.07472	1.0941	1.1352	1.07068	0.551882	2.64296	9.5	7.29747	-92.86	18.6944	-0.0348719	-27.8205	-2.95	-0.0175027	-0.102268	0	-1.01421	-0.00185199	-0.0156507	3.055	-7.9823	-1.77606	233.166	67.031	130.844	16.277	-1.33827	1.89101	1.09718	0	1	-0.40136	0.11491	11.491	0	0
Cyprus	2015	1	0	1.03162	1.01027	1.04765	1.01755	0.971173	0.542449	3.36739	10.4	8.81165	-91.85	18.6916	-0.0198579	-29.7436	-2.92	-0.00909074	-0.0914479	0	-1.20423	0	-0.00909074	3.03329	-8.06827	3.41892	137.221	66.946	137.276	15.026	-0.754231	1.74577	1.01699	1	0	-0.392772	0.117608	11.7607	0	0
Cyprus	2016	1	0	1.04652	0.693161	1.04042	0.926267	0.789454	0.593787	3.46056	10.3	8.68918	-91.91	18.6807	-0.00147131	-27.9487	-2.92	-0.000224084	-0.0827792	0	-1.28283	-0.000224084	0	2.91472	-8.59393	6.57359	15.8272	66.881	139.022	13.006	-0.574742	1.51149	0.887625	1	0	-0.38712	0.119383	11.9383	0	0
Cyprus	2017	1	0	1.05626	0.854455	1.01848	0.885379	0.746647	0.530974	4.24367	10.9	8.69724	-91.17	18.6786	-0.00539149	-27.6923	-2.85	-0.00324343	-0.0761381	0	-1.23632	0	-0.00324343	2.99571	-8.6886	5.75083	184.054	66.836	148.013	11.155	1.02039	1.51452	0.889297	1	0	-0.389551	0.118619	11.8619	0	0
Cyprus	2018	1	0	1.01571	0.721053	0.862575	0.883621	0.607749	0.484542	4.67879	12	9.43538	-90.52	18.6764	-0.00469231	-26.5385	-2.7	-0.00309379	-0.0796041	0	-1.14295	0	-0.00309379	2.91902	-8.92815	6.27166	307.087	66.81	147.624	8.504	1.02575	1.28106	0.76039	1	0	-0.393681	0.117322	11.7322	0	0
Cyprus	2019	1	0	1.04664	0.726727	0.999725	0.955758	0.59895	0.544598	5.03131	12	10.0128	-90	18.6742	-0.00361325	-25.8974	-2.57	-0.00236637	-0.0851097	0	-1.19472	0	-0.00236637	2.51853	-9.45144	5.8756	431.788	66.805	150.506	7.155	1.35009	1.4199	0.837057	1	0	-0.390491	0.118324	11.8324	0	0
Cyprus	2020	0	1	0.902293	0.547239	0.993248	0.839449	0.349943	0.288778	6.74845	15	12.3048	-87.61	18.6721	-0.00793109	-29.6154	-2.54	-0.00565437	-0.0952721	0	-1.22486	0	-0.00565437	2.4371	-9.03013	-3.22063	-296.013	66.821	160.669	7.755	-1.20792	1.00614	0.60859	0	1	-0.383842	0.120412	12.0412	0	0
Czechia	2002	0	0	1.0164	0.859825	1.11262	0.921997	0.358058	1.0441	4.30747	7.3	4.3893	-86.09	34.1828	-0.470039	-14.5103	-6.67	-0.0959385	-0.150099	-0.00899227	-3.01453	-0.0869463	0	2.42972	-143.783	1.51346	10.2855	73.809	90.8793	7.28	2.80028	1.61956	0.947298	0	0	-0.0980614	0.210166	21.0166	0	0
Czechia	2003	0	0	1.01418	0.87371	1.13681	0.854176	0.489982	0.887058	4.08839	6.7	2.7516	-83.69	34.2088	-0.416967	-14.6038	-6.72	-0.0951696	-0.149663	-0.017135	-2.66709	-0.0780347	0	2.52078	-147.44	3.30084	2.0125	73.74	94.6469	7.777	1.41248	1.59385	0.933105	0	0	-0.11188	0.205826	20.5827	0	0
Czechia	2004	1	0	0.954461	0.758331	0.999591	0.864508	0.38449	0.653876	4.34653	7.1	3.89499	-83.18	34.2393	-0.8882	-14.6973	-6.56	-0.269712	-0.141043	-0.0215469	-2.38602	-0.248165	0	2.61194	-148.362	4.73634	5.3463	73.671	113.174	8.298	4.05711	1.30888	0.775751	1	0	-0.112833	0.205527	20.5527	0	0
Czechia	2005	1	0	0.905673	0.857741	1.10903	0.913031	0.480226	0.936384	4.53098	7.5	4.57711	-83.12	34.2653	-0.767854	-14.7909	-6.08	-0.220348	-0.136402	-0.0188412	-2.13422	-0.201507	0	2.66123	-145.105	6.37503	10.0027	73.602	121.191	7.927	0.117801	1.56776	0.918695	1	0	-0.143292	0.195961	19.5961	0	0
Czechia	2006	1	0	0.962293	0.862385	1.10807	1.0825	0.350347	1.05373	4.64362	7.9	5.01095	-82.47	34.2957	-0.764906	-14.8844	-5.83	-0.23876	-0.130551	-0.0426097	-2.01828	-0.19615	0	2.56507	-147.922	6.62317	4.56488	73.533	127.051	7.141	0.68324	1.6677	0.973882	1	0	-0.15334	0.192805	19.2805	0	0
Czechia	2007	1	0	0.995284	0.878744	1.05317	0.845192	0.321369	1.01541	5.00698	8.3	4.3591	-82.74	34.3217	-0.695946	-14.9779	-5.51	-0.241828	-0.129954	-0.0526575	-1.78919	-0.18917	0	2.60643	-150.239	5.48883	7.26984	73.463	129.877	5.316	3.56087	1.52697	0.896173	1	0	-0.175285	0.185913	18.5913	0	0
Czechia	2008	0	0	1.03276	0.900237	1.22246	0.951469	0.34374	1.04988	5.53901	9	4.88116	-80.82	34.3522	-1.53373	-15.1179	-5.26	-0.477738	-0.130285	-0.024383	-1.42775	-0.453355	0	2.57176	-142.624	2.61227	3.72734	73.394	123.905	4.392	2.02633	1.70924	0.996816	0	0	-0.17292	0.186656	18.6656	0	0
Czechia	2009	0	1	1.03304	0.956218	1.30928	0.873512	0.380893	0.905829	6.55582	10.2	6.33642	-78.87	34.3782	-0.701083	-14.8061	-5.19	-0.198173	-0.136439	-0.0170688	-1.58986	-0.181104	0	2.61758	-135.613	-4.79832	2.54702	73.324	113.049	6.662	2.64519	1.69618	0.989606	0	1	-0.187674	0.182022	18.2022	0	0
Czechia	2010	0	0	1.01487	0.930919	1.29729	0.901729	0.38459	0.989234	6.64803	10.9	7.55942	-79.24	34.4086	-0.965734	-14.8365	-5.37	-0.298843	-0.129909	-0.0319083	-1.65854	-0.266935	0	2.58036	-138.082	2.71467	4.81503	73.255	126.756	7.281	-0.485125	1.72055	1.00306	0	0	-0.167756	0.188278	18.8278	0	0
Czechia	2011	0	0	1.02266	1.0175	1.1958	0.922614	0.383604	1.10912	7.49049	12.2	9.08699	-77.96	34.4372	-1.07009	-14.3498	-5.08	-0.330178	-0.123954	-0.0179261	-1.54304	-0.312252	0	2.69836	-135.292	1.77238	1.80994	73.185	136.751	6.712	-0.221133	1.77295	1.032	0	0	-0.175426	0.185869	18.5869	0	0
Czechia	2012	0	1	0.97038	1.0226	1.05303	0.921719	0.31018	1.05411	8.09381	12.8	10.0615	-76	34.4657	-0.64058	-13.9954	-5.09	-0.183765	-0.118676	-0.0154678	-1.68635	-0.168297	0	2.61172	-130.821	-0.770668	4.48424	73.197	145.48	6.979	1.34339	1.62688	0.95134	0	1	-0.176479	0.185538	18.5538	0	0
Czechia	2013	0	1	0.984484	1.02387	1.07856	0.915809	0.299112	1.08478	8.79126	13.9	11.7516	-74.9	34.4987	-0.382852	-12.5498	-5.09	-0.109374	-0.114682	-0.0187183	-1.64937	-0.0906553	0	2.48675	-126.811	-0.0418124	3.45387	73.29	145.502	6.953	1.27159	1.65221	0.965328	0	1	-0.177319	0.185274	18.5274	0	0
Czechia	2014	0	0	1.02663	1.13887	1.00139	1.03113	0.429757	0.98999	9.59231	14.8	11.867	-73.89	34.5272	-0.345429	-12.5475	-4.83	-0.096606	-0.105869	-0.0206356	-1.68382	-0.0759704	0	2.48115	-124.853	2.24521	3.8351	73.384	156.415	6.108	2.70672	1.75076	1.01974	0	0	-0.183285	0.183401	18.3401	0	0
Czechia	2015	1	0	1.04274	1.10709	1.08392	1.0256	0.467913	0.970251	9.85824	14.8	12.7512	-75.01	34.5602	-0.314062	-12.1673	-4.59	-0.0817971	-0.100234	-0.0286493	-1.96839	-0.0531478	0	2.42361	-126.48	4.95876	0.898913	73.477	154.018	5.048	1.23454	1.78941	1.04108	1	0	-0.18034	0.184325	18.4325	0	0
Czechia	2016	0	0	1.02528	0.988327	0.973719	1.00812	0.555946	0.963384	10.1152	14.8	12.7075	-75.96	34.5791	-0.310276	-12.4319	-4.43	-0.0897844	-0.0983218	-0.0421697	-1.99599	-0.0476147	0	2.45906	-128.512	2.58087	5.47566	73.57	148.547	3.952	1.49123	1.69937	0.991365	0	0	-0.185808	0.182608	18.2608	0	0
Czechia	2017	1	0	0.880147	1.08859	1.22256	1.03059	0.568141	0.990651	9.88078	14.5	12.4026	-74.63	34.6025	-0.372293	-12.3954	-4.39	-0.12387	-0.0930239	-0.068106	-1.84736	-0.0557637	0	2.36471	-130.965	5.17357	5.07066	73.675	147.751	2.893	1.68362	1.829	1.06294	1	0	-0.189107	0.181572	18.1572	0	0
Czechia	2018	0	0	0.822354	1.01981	1.26731	0.951154	0.509728	1.02641	9.9744	14.7	11.9061	-73.77	34.626	-0.389419	-12.0913	-4.26	-0.176675	-0.0981865	-0.118193	-1.67982	-0.0584818	0	2.32504	-134.945	2.83031	3.30354	73.792	145.142	2.246	2.81336	1.74923	1.0189	0	0	-0.196142	0.179363	17.9363	0	0
Czechia	2019	1	0	0.834153	1.01709	1.23533	0.919643	0.533486	0.941996	10.8164	15.9	12.9178	-72.23	34.6514	-0.39979	-11.4525	-4.07	-0.223781	-0.0998787	-0.184074	-1.65481	-0.0397075	0	2.37561	-135.586	3.56578	4.18706	73.921	138.155	2.015	3.84132	1.69713	0.99013	1	0	-0.196313	0.179309	17.9309	0	0
Czechia	2020	0	1	0.978555	1.01845	1.23467	0.910965	0.555441	0.912328	11.9115	17	14.3377	-69.59	34.678	-0.416571	-10.3878	-4.06	-0.246202	-0.106401	-0.222366	-1.58193	-0.0238354	0	2.25198	-129.189	-5.30488	3.39114	74.061	128.78	2.55	4.51623	1.7549	1.02203	0	1	-0.189621	0.18141	18.141	0	0
Denmark	2002	0	0	1.53287	1.88234	1.71137	2.02404	2.31065	1.52424	10.6501	11.9	17.2805	-87.99	14.3644	-1.17563	-10.89	-3	-0.993664	-0.0861976	0	-0.61505	-0.993664	0	5.0784	-75.7583	0.45653	2.47819	85.25	84.4846	4.274	2.38933	4.12096	2.32848	0	0	-0.342211	0.133487	13.3487	0	0
Denmark	2003	0	0	1.60145	1.92051	1.73272	2.08798	2.35876	1.20382	11.5129	12.7	17.4901	-89.68	14.4017	-1.10245	-10.7556	-3.16	-0.924501	-0.0822091	-0.000337925	-0.575817	-0.924163	0	4.87496	-81.0378	0.441091	0.54245	85.36	80.7613	5.398	1.49454	4.09191	2.31244	0	0	-0.339206	0.134431	13.4431	0	0
Denmark	2004	0	0	1.80099	1.93052	1.74865	2.28722	2.40682	1.08434	12.7934	14.4	23.5444	-85.47	14.4389	-1.30913	-10.6211	-2.98	-1.10382	-0.0787684	-0.00109088	-0.470997	-1.10273	0	5.07742	-74.6412	2.77635	-3.49391	85.566	82.0077	5.204	2.08489	4.25329	2.40155	0	0	-0.327426	0.13813	13.8131	0	0
Denmark	2005	0	0	1.73961	1.93611	1.64963	2.11491	2.27821	1.0735	14.0916	16.1	27.0706	-82.17	14.4761	-1.72068	-10.4867	-2.83	-1.45107	-0.0731318	-0.0072389	-0.438098	-1.44172	-0.00211821	5.04003	-70.8993	2.35961	4.84519	85.856	89.3988	4.83	2.89795	4.04326	2.28558	0	0	-0.302574	0.145936	14.5936	0	0
Denmark	2006	1	0	1.57164	1.9835	1.80343	2.22395	2.45912	1.04679	13.5984	15.3	20.1728	-86.64	14.5133	-1.82155	-9.87167	-2.92	-1.5277	-0.0695474	-0.00415203	-0.497908	-1.52158	-0.00197103	4.80607	-78.307	3.81649	0.841696	86.098	97.4299	3.897	2.08855	4.17806	2.36001	1	0	-0.30171	0.146207	14.6207	0	0
Denmark	2007	0	0	1.4777	1.99517	1.92671	2.34719	2.43483	1.11819	15.1233	17.7	26.2107	-82.05	14.5506	-1.60947	-9.25667	-2.83	-1.35721	-0.0694337	-0.00545445	-0.428463	-1.34839	-0.00337097	4.8398	-74.1059	0.987174	3.688	86.293	100.048	3.801	2.42481	4.27813	2.41526	0	0	-0.302872	0.145842	14.5842	0	0
Denmark	2008	0	1	1.53831	1.95406	1.87365	2.24136	2.37641	1.06539	15.769	18.5	27.5726	-80.36	14.5878	-2.10773	-11.6	-2.76	-1.84174	-0.0687265	-0.00449388	-0.376538	-1.8332	-0.00405017	4.29218	-68.9703	-0.417178	0.61728	86.487	104.47	3.683	4.25426	4.16603	2.35337	0	1	-0.272299	0.155444	15.5444	0	0
Denmark	2009	0	1	1.53826	1.91713	1.87865	2.22861	2.43549	1.00118	16.6259	19.3	27.6591	-79.97	14.625	-1.18379	-10.995	-2.8	-0.995778	-0.0722021	-0.00385927	-0.407988	-0.988015	-0.00390379	4.06094	-65.9817	-4.97448	1.17143	86.654	89.3949	6.409	0.571749	4.14326	2.34079	0	1	-0.31437	0.142231	14.2231	0	0
Denmark	2010	0	0	1.54196	1.89844	1.87385	2.10007	2.35236	1.04096	18.5077	21.2	31.9834	-78.4	14.6622	-1.21807	-13.4817	-2.87	-1.01593	-0.0696275	-0.00565312	-0.420209	-1.01028	0	4.11532	-65.4092	1.5829	-3.56794	86.795	94.3877	7.746	3.18686	4.05841	2.29394	0	0	-0.302914	0.145829	14.5829	0	0
Denmark	2011	0	0	1.55171	1.91979	1.89863	2.10107	2.39288	1.10029	19.7096	23.8	40.2539	-74.81	14.8532	-1.63538	-14.4283	-2.62	-1.35864	-0.0650947	-0.00431473	-0.366001	-1.35366	-0.000666504	4.13268	-59.5573	1.3108	3.93793	86.957	102.013	7.769	0.64638	4.12718	2.33191	0	0	-0.27788	0.153691	15.3691	0	0
Denmark	2012	0	1	1.67411	1.87507	1.79916	1.98699	2.38246	0.914911	21.0918	26.9	48.3304	-70.91	15.0442	-1.5221	-12.1417	-2.5	-1.26522	-0.0600945	-0.00631337	-0.354968	-1.25679	-0.00211488	4.04337	-54.2348	-0.0054323	-5.00312	87.142	104.362	7.798	2.40784	3.97801	2.24954	0	1	-0.267441	0.15697	15.697	0	0
Denmark	2013	0	0	1.66624	1.90229	1.80029	1.94326	2.39938	0.959233	21.1448	27	45.9609	-72.31	15.2351	-1.17608	-16.8167	-2.49	-0.954891	-0.052883	-0.00892016	-0.364416	-0.945528	-0.000443046	4.0325	-56.0935	1.39267	0.197411	87.292	103.613	7.384	0.846911	3.99336	2.25802	0	0	-0.293649	0.148739	14.8739	0	0
Denmark	2014	0	0	1.52456	2.10074	1.6811	1.78493	2.25216	0.95178	22.6632	30.2	55.8777	-68.35	15.4261	-0.983209	-16.4867	-2.31	-0.797732	-0.0480736	-0.0106177	-0.329682	-0.787114	0	4.01248	-52.6587	1.278	1.86416	87.41	103.211	6.925	1.01871	3.82403	2.16452	0	0	-0.290727	0.149656	14.9657	0	0
Denmark	2015	0	0	1.55307	2.01513	1.72294	1.79474	2.18585	0.887059	23.9588	32.5	65.4356	-64.78	15.617	-0.521485	-13.53	-2.25	-0.439261	-0.0461805	-0.0110017	-0.375634	-0.428259	0	3.99884	-49.6801	2.10441	0.610751	87.526	105.13	6.278	0.409103	3.76841	2.13381	0	0	-0.292014	0.149252	14.9252	0	0
Denmark	2016	0	0	1.54204	1.88295	1.56364	1.82118	2.203	0.852912	25.1079	32	60.2201	-64.89	15.6165	-0.342478	-14.7833	-2.23	-0.287535	-0.0459658	-0.00825182	-0.39537	-0.279283	0	3.93341	-52.7142	3.07305	2.49983	87.642	101.453	5.989	0.426513	3.62982	2.05729	0	0	-0.306589	0.144675	14.4675	0	0
Denmark	2017	0	0	1.5181	1.80427	1.61216	1.74683	2.19075	0.854938	27.2591	35	70.266	-62	15.64	-0.470201	-14.93	-2.18	-0.395816	-0.045576	-0.00717842	-0.365251	-0.388637	0	3.6786	-50.4788	3.05648	1.0878	87.757	104.216	5.833	1.10062	3.56977	2.02413	0	0	-0.282079	0.152373	15.2373	0	0
Denmark	2018	0	0	1.57402	1.77323	1.62839	1.8106	2.157	0.931982	27.2289	34.6	68.3574	-61.92	15.664	-0.587863	-18.4303	-2.13	-0.476981	-0.0456513	-0.00802744	-0.353913	-0.468954	0	3.64451	-52.6173	1.86001	2.4667	87.874	108.814	5.131	0.593022	3.63669	2.06108	0	0	-0.284888	0.15149	15.149	0	0
Denmark	2019	0	0	1.54343	1.83338	1.54763	1.87327	2.12165	0.967599	28.6529	37.2	78.1718	-58.52	15.6875	-0.446225	-15.7599	-2.03	-0.351826	-0.0445329	-0.00628435	-0.339691	-0.345542	0	3.32505	-48.4703	1.7114	-1.10067	87.994	111.891	5.018	0.950879	3.63896	2.06233	0	0	-0.27283	0.155277	15.5277	0	0
Denmark	2020	0	1	1.51479	1.80679	1.78572	1.84007	2.23649	0.920234	30.7044	39.5	81.6168	-55.01	15.711	-0.162333	-16.2738	-1.99	-0.113632	-0.0431775	-0.00527616	-0.314726	-0.108356	0	3.18144	-46.3305	-1.78011	0.363875	88.116	104.433	5.637	2.82692	3.7442	2.12044	0	1	-0.277162	0.153917	15.3917	0	0
Dominican Republic	2002	1	0	0.237251	-0.705225	-0.256924	-0.38699	-0.472972	0.118559	10.921	17.9	7.75874	-87.96	41.2461	-0.0276478	-21.6996	-3.87	-0.014221	-0.563231	-0.00808182	-1.61933	0	-0.00613918	1.90719	-33.4745	4.4865	3.41226	63.371	68.7233	6.779	6.92947	-1.44317	-0.743825	1	0	-0.234049	0.167457	16.7457	0	0
Dominican Republic	2003	0	1	0.0232535	-0.640383	-0.39023	-0.555919	-0.728653	-0.419894	11.7855	18.9	10.3624	-86.48	41.4545	-0.541632	-22.1983	-3.53	-0.429619	-0.568428	-0.0111415	-1.96767	0	-0.418477	1.67851	-31.0986	-1.34936	2.88055	64.605	84.4495	6.938	33.4665	-1.9881	-1.04472	0	1	-0.206683	0.176052	17.6052	0	0
Dominican Republic	2004	0	0	0.0470071	-0.680871	-0.446592	-0.659424	-0.592195	-0.34431	12.5211	20.7	14.1389	-85.42	41.6628	-1.21413	-22.697	-3.34	-0.993006	-0.577607	-0.011163	-1.85897	0	-0.981843	1.55386	-30.5658	2.58557	4.18629	66.003	81.3514	6.303	45.1445	-1.98154	-1.0411	0	0	-0.185758	0.182624	18.2624	0	0
Dominican Republic	2005	1	0	-0.0705539	-0.685749	-0.392354	-0.517401	-0.710663	-0.258761	11.6893	19.4	15.1134	-85.96	41.8711	-0.721035	-23.1957	-3.19	-0.577429	-0.501644	-0.00686386	-1.28373	0	-0.570565	1.67084	-31.849	9.43179	3.12598	67.37	61.6536	6.587	5.77782	-1.95819	-1.0282	1	0	-0.233179	0.16773	16.773	0	0
Dominican Republic	2006	1	0	0.205658	-0.584696	-0.233389	-0.55784	-0.723455	-0.109803	11.2224	18	13.3204	-86.67	42.0795	-1.60623	-24.6306	-3.03	-1.272	-0.459865	-0.0223851	-1.38658	0	-1.24962	2.41572	-34.0604	9.17121	4.03566	68.71	63.7665	5.654	6.64432	-1.6701	-0.869129	1	0	-0.216829	0.172865	17.2865	0	0
Dominican Republic	2007	1	0	0.197004	-0.625863	-0.223226	-0.66655	-0.775851	-0.0785725	10.9966	17.9	12.3518	-87.06	42.2878	-2.52805	-26.0655	-2.93	-2.01494	-0.416012	-0.0205407	-1.27156	0	-1.9944	2.64994	-35.1768	7.41841	5.12425	70.02	61.2293	5.158	7.63417	-1.74513	-0.910559	1	0	-0.198111	0.178744	17.8744	0	0
Dominican Republic	2008	0	0	0.164732	-0.682736	-0.161351	-0.635512	-0.752359	-0.0380077	11.248	17.7	10.2487	-87.08	42.4962	-0.234147	-27.5004	-2.73	-0.142707	-0.372345	-0.0193254	-1.19101	0	-0.123382	2.58536	-35.4829	3.26809	5.67336	71.3	61.4285	4.764	10.2576	-1.71356	-0.893126	0	0	-0.2886	0.150325	15.0325	0	0
Dominican Republic	2009	0	0	0.0897984	-0.809174	-0.163394	-0.620938	-0.806729	-0.0027351	11.3077	17.3	11.4342	-86.89	42.7045	-0.123504	-28.9353	-2.64	-0.071919	-0.37903	-0.0177564	-1.16666	0	-0.0541625	2.18792	-35.1318	1.00345	3.51549	72.542	50.6509	5.467	3.42648	-1.80605	-0.944194	0	0	-0.292444	0.149117	14.9117	0	0
Dominican Republic	2010	1	0	0.0738619	-0.855494	-0.116028	-0.687138	-0.883081	-0.044954	10.9329	16.9	10.3924	-87.39	42.9129	-0.1724	-30.3702	-2.57	-0.104515	-0.353908	-0.0359679	-1.138	0	-0.0685474	2.19527	-36.5034	8.40115	3.38321	73.753	56.0574	5.212	5.34931	-1.89027	-0.990696	1	0	-0.297154	0.147638	14.7638	0	0
Dominican Republic	2011	0	0	0.0904333	-0.808169	-0.173335	-0.63082	-0.844827	-0.00048185	10.4664	16.8	10.4582	-87.77	43.0392	-0.340211	-30.3702	-2.54	-0.195029	-0.368197	-0.0303895	-1.11826	0	-0.164639	2.23976	-36.8446	3.19196	3.79218	74.827	59.0693	6.087	7.96629	-1.82954	-0.957165	0	0	-0.295648	0.148111	14.8111	0	0
Dominican Republic	2012	0	0	0.124592	-0.716866	-0.0618661	-0.538395	-0.897265	0.252367	10.4031	16.5	11.8743	-87.49	43.1656	-0.446841	-30.3702	-2.54	-0.302616	-0.399581	-0.0300338	-1.15576	0	-0.272582	2.18369	-37.6938	2.77567	5.64037	75.802	58.5063	6.722	4.97848	-1.5902	-0.825013	0	0	-0.288156	0.150464	15.0464	0	0
Dominican Republic	2013	1	0	0.115322	-0.534986	-0.02113	-0.488939	-0.912038	0.207429	10.4493	16.6	12.7273	-87.12	43.292	-1.02972	-30.3702	-2.36	-0.79748	-0.419801	-0.0420502	-1.15259	0	-0.75543	2.00212	-37.3827	4.93473	2.55757	76.749	56.8138	7.351	4.6286	-1.49534	-0.772633	1	0	-0.270942	0.15587	15.587	0	0
Dominican Republic	2014	1	0	0.188916	-0.383905	0.0333385	-0.456835	-0.842135	0.145934	10.8551	17.3	9.64886	-87.35	43.4184	-1.03751	-30.3702	-2.19	-0.801067	-0.409799	-0.0507971	-1.12969	0	-0.750269	1.93326	-37.8997	7.11123	3.55939	77.67	55.6601	6.719	4.21578	-1.35006	-0.692414	1	0	-0.278543	0.153483	15.3483	0	0
Dominican Republic	2015	1	0	0.154222	-0.529519	0.0140788	-0.39482	-0.87373	0.227571	9.6021	14.9	7.7969	-89.01	43.5448	-0.535348	-30.3702	-2.21	-0.39547	-0.400586	-0.0391721	-1.20227	0	-0.356298	1.8066	-40.295	6.98771	3.13851	78.566	52.3471	7.605	2.38116	-1.3909	-0.714963	1	0	-0.297966	0.147383	14.7383	0	0
Dominican Republic	2016	1	0	0.181856	-0.394124	-0.00929668	-0.29074	-0.810472	0.241259	9.47079	15.3	11.3263	-88.6	43.7123	-1.28195	-30.3702	-2.21	-1.01867	-0.385572	-0.0502859	-1.21883	0	-0.968384	1.80918	-41.6983	6.71974	3.33025	79.436	51.7307	7.284	2.01539	-1.24994	-0.637134	1	0	-0.266135	0.15738	15.738	0	0
Dominican Republic	2017	1	0	0.159204	-0.428011	-0.0386812	-0.383381	-0.787599	0.152074	10.3736	16.9	15.2863	-86.88	43.8797	-1.03534	-30.3702	-2.09	-0.819659	-0.367629	-0.042597	-1.15633	0	-0.777062	1.87117	-40.9754	3.93386	4.55026	80.277	50.7595	5.832	3.90748	-1.36035	-0.698097	1	0	-0.272838	0.155275	15.5275	0	0
Dominican Republic	2018	1	0	0.124981	-0.365241	-0.0285367	-0.388736	-0.830889	0.0123004	9.99295	15.9	13.9843	-87.6	44.0472	-0.868889	-30.3702	-2.06	-0.680583	-0.34639	-0.0303982	-1.2113	0	-0.650185	1.8101	-43.4071	7.09752	3.22902	81.074	52.3352	5.861	4.54051	-1.42244	-0.732379	1	0	-0.279869	0.153067	15.3067	0	0
Dominican Republic	2019	1	0	0.179251	-0.320301	-0.0187733	-0.351295	-0.83899	-0.00311227	9.01871	14.4	12.2697	-88.9	44.3174	-1.05544	-30.3702	-2.16	-0.731702	-0.331216	-0.0282514	-1.30833	0	-0.70345	1.83444	-46.4911	4.89403	3.17367	81.828	50.913	6.356	3.59545	-1.36597	-0.701199	1	0	-0.273271	0.155139	15.5139	0	0
Dominican Republic	2020	0	1	0.237135	-0.171014	0.0231651	-0.281448	-0.750963	0.164981	9.8317	16	17.1097	-87.34	44.4852	-1.23931	-30.3702	-2.11	-0.839001	-0.354788	-0.0365317	-1.39347	0	-0.80247	1.3788	-45.2095	-7.92905	3.13266	82.54	44.7332	6.126	5.45467	-1.11233	-0.561148	0	1	-0.252613	0.161627	16.1627	0	0
Ecuador	2002	1	0	-0.0449888	-0.756515	-0.729015	-0.831196	-0.868261	-0.759721	6.85101	17.1	63.2876	-86.13	54.7191	-8.38815	-2.16684	-3.48	-5.7119	-0.321121	-0.261485	-1.78447	-5.39031	-0.0601127	0.254375	-91.3574	4.9281	2.89516	61.118	54.7966	4.836	11.4866	-2.56578	-1.36369	1	0	0.266036	0.324517	32.4517	0	0
Ecuador	2003	0	0	-0.121541	-0.780573	-0.723996	-0.936161	-0.728124	-0.961057	6.0303	16.6	62.1897	-87.07	54.4363	-8.74011	-2.19168	-3.73	-6.11522	-0.325802	-0.250366	-1.67476	-5.78809	-0.0767642	0.217467	-92.8084	2.8845	2.81449	61.316	52.3575	5.662	11.2473	-2.68373	-1.42882	0	0	0.288708	0.331638	33.1638	0	0
Ecuador	2004	1	0	-0.244636	-0.7649	-0.699336	-0.957234	-0.72667	-0.84291	6.15854	16.7	58.9329	-86.56	54.1536	-12.5726	-2.21652	-3.54	-9.58143	-0.319625	-0.24243	-1.66206	-9.27652	-0.0624778	0.200134	-95.8484	6.8324	2.37801	61.514	56.0745	5.002	6.39062	-2.67847	-1.42591	1	0	0.483247	0.392736	39.2736	0	0
Ecuador	2005	1	0	-0.363743	-0.821378	-0.777637	-0.967795	-0.735879	-0.793962	6.40596	16.2	52.1151	-87.21	53.8708	-16.8498	-2.24137	-3.65	-13.9622	-0.320294	-0.218615	-1.65419	-13.6759	-0.0676821	0.218969	-96.1247	5.39862	1.22499	61.711	61.9582	3.779	8.58299	-2.78388	-1.48412	1	0	0.728334	0.46971	46.971	1	0
Ecuador	2006	1	0	-0.253863	-1.031	-1.09883	-1.03794	-0.784096	-0.853825	5.24116	14.2	48.1251	-88.19	53.588	-18.3894	-2.24137	-3.43	-15.4676	-0.331026	-0.274681	-1.64294	-15.1038	-0.0890865	0.187789	-97.8938	4.34113	0.594056	61.907	65.8424	3.55	8.71659	-3.06471	-1.63918	1	0	0.797801	0.491527	49.1527	1	0
Ecuador	2007	0	0	-0.161116	-1.03286	-1.13694	-0.86145	-0.745632	-0.815987	5.61486	15.9	53.3967	-87.61	53.3052	-16.9002	-2.24137	-3.69	-14.0049	-0.341926	-0.307014	-1.61124	-13.6453	-0.052601	0.193461	-94.8243	1.90243	0.388922	62.104	68.8506	3.142	7.06342	-2.93067	-1.56517	0	0	0.729311	0.470016	47.0016	1	0
Ecuador	2008	1	0	-0.222305	-1.10531	-1.12755	-0.854378	-0.654706	-0.728682	5.19461	15.3	61.8215	-85.69	53.0224	-18.9619	-2.24137	-3.07	-15.423	-0.336917	-0.274048	-1.41065	-15.1358	-0.0131053	0.214596	-92.5745	6.56492	1.7295	62.3	74.5903	3.917	15.0941	-2.90802	-1.55266	1	0	0.798634	0.491788	49.1788	1	0
Ecuador	2009	0	0	-0.250357	-1.20504	-1.25918	-0.738012	-0.744574	-0.673676	3.897	12.9	51.7117	-88.87	52.7397	-9.26408	-2.24137	-3.39	-7.34247	-0.344173	-0.283044	-1.55581	-6.95874	-0.100694	0.276338	-93.551	1.09101	0.51357	62.495	57.3473	4.608	-2.76913	-2.99168	-1.59885	0	0	0.306525	0.337234	33.7234	0	0
Ecuador	2010	1	0	-0.231081	-1.14323	-1.12405	-0.674511	-0.707744	-0.586674	3.65943	11.8	45.4916	-90.07	52.4569	-11.7907	-2.24137	-3.47	-9.85464	-0.345733	-0.44262	-1.5525	-9.30467	-0.107349	0.327	-94.0586	4.02914	0.243419	62.69	65.7774	4.088	9.01372	-2.80734	-1.49707	1	0	0.444611	0.380602	38.0602	0	0
Ecuador	2011	1	0	-0.293365	-1.14429	-0.956344	-0.52782	-0.641708	-0.686558	3.66356	13.2	55.7957	-88.56	52.2886	-16.5774	-2.24137	-3.38	-13.6273	-0.327727	0	-1.41753	-13.4798	-0.147432	0.309147	-93.5062	8.48148	0.817967	62.851	70.0357	3.458	6.83751	-2.70169	-1.43873	1	0	0.67773	0.453816	45.3816	1	0
Ecuador	2012	1	0	-0.296114	-1.06393	-0.943592	-0.474285	-0.508598	-0.570306	3.66328	13.2	54.8734	-88.43	52.1203	-14.5265	-2.24137	-3.17	-12.0214	-0.332188	0	-1.3309	-11.8785	-0.142932	0.445723	-92.5907	5.78321	0.64674	62.988	67.0029	3.235	5.00324	-2.53151	-1.34477	1	0	0.565084	0.418438	41.8438	0	0
Ecuador	2013	1	0	-0.25279	-0.870364	-0.837611	-0.448586	-0.502912	-0.178657	3.338	11.8	48.9859	-89.64	51.9519	-12.8813	-2.24137	-3.21	-10.5653	-0.322527	0	-1.37016	-10.4371	-0.128246	0.461485	-93.8626	7.21124	0.752903	63.125	63.4333	3.083	2.66687	-2.19176	-1.15717	1	0	0.47211	0.389238	38.9238	0	0
Ecuador	2014	1	0	-0.202547	-0.970792	-0.920284	-0.385554	-0.741118	-0.0185332	3.47582	12.2	49.1798	-89.78	51.7836	-11.5904	-2.24137	-3.38	-9.82744	-0.316755	0	-1.40541	-9.75777	-0.0696711	0.478429	-93.4865	4.22607	0.751953	63.261	61.4264	3.48	2.05296	-2.2572	-1.19331	1	0	0.430295	0.376106	37.6106	0	0
Ecuador	2015	0	0	-0.211861	-0.956418	-1.14158	-0.394528	-0.672377	-0.147345	3.54603	13.1	52.5587	-88.71	51.6153	-4.63202	-2.24137	-3.26	-3.7289	-0.326441	0	-1.48077	-3.67849	-0.0504083	0.495918	-94.8241	0.119692	1.36067	63.398	47.828	3.616	-5.47563	-2.39473	-1.26924	0	0	0.0705069	0.263108	26.3108	0	0
Ecuador	2016	0	1	-0.24727	-0.649084	-0.958474	-0.383571	-0.680793	-0.0917104	3.77281	14.8	60.2131	-87.01	51.3565	-3.75807	-2.24137	-3.16	-2.95547	-0.323657	0	-1.45839	-2.89049	-0.0649832	0.430569	-96.6767	-0.687954	0.784918	63.534	40.5345	4.597	1.17114	-2.1568	-1.13787	0	1	0.0312777	0.250787	25.0787	0	0
Ecuador	2017	1	0	-0.172362	-0.718141	-1.02359	-0.352248	-0.626105	-0.0789321	3.88348	17	73.695	-84.67	51.0978	-4.98372	-2.24137	-3.18	-4.08693	-0.308562	0	-1.41611	-4.02018	-0.0667425	0.433396	-90.204	5.9704	0.605382	63.67	43.6177	3.836	0.932032	-2.14403	-1.13081	1	0	0.114623	0.276963	27.6963	0	0
Ecuador	2018	0	0	0.000832675	-0.663264	-0.886889	-0.317794	-0.6295	-0.0947212	3.65921	16.3	72.5791	-84.35	50.839	-7.09642	-2.24137	-3.1	-6.22088	-0.296322	0	-1.5034	-6.22088	0	0.444021	-86.4271	1.04429	1.29449	63.821	48.0093	3.53	1.8194	-1.96643	-1.03275	0	0	0.23626	0.315166	31.5166	0	0
Ecuador	2019	0	0	0.0317209	-0.542951	-0.796694	-0.367696	-0.509275	-0.238218	3.58614	17.7	78.2559	-83.8	50.5802	-5.8207	-2.24137	-3.27	-5.11414	-0.290798	0	-1.52686	-5.11414	0	0.395404	-86.3411	0.165404	0.910478	63.986	48.0828	3.812	-0.0565743	-1.88774	-0.989299	0	0	0.184734	0.298983	29.8983	0	0
Ecuador	2020	0	1	-0.0146999	-0.54095	-0.871133	-0.470506	-0.504087	-0.270243	3.98864	20.2	79.7157	-81.42	50.3214	-2.92431	-2.24137	-3.12	-2.33936	-0.318871	0	-1.56165	-2.33936	0	0.28242	-80.7991	-9.2451	1.16241	64.166	43.9893	6.127	-1.82596	-2.00255	-1.0527	0	1	0.0258555	0.249084	24.9084	0	0
El Salvador	2002	0	0	0.122131	-0.566521	-0.169806	-0.609856	-0.813145	0.293994	18.0182	34	52.7236	-53.74	32.0888	-0.470738	-10.7017	-3.68	-0.477362	-0.470891	-0.468771	-0.970014	-0.0085907	0	0.512469	-13.227	1.57292	3.71125	60.014	65.9191	6.2	1.51063	-1.55679	-0.806563	0	0	-0.136647	0.198048	19.8048	0	0
El Salvador	2003	0	0	0.107482	-0.516855	-0.246245	-0.4603	-0.416794	-0.180754	17.7645	33.9	58.6908	-54.48	31.8716	-0.464557	-11.6514	-3.88	-0.472391	-0.451901	-0.459702	-1.06697	-0.012689	0	0.507253	-13.6823	1.56539	1.06615	60.561	68.237	6.9	2.96567	-1.54898	-0.802252	0	0	-0.122303	0.202553	20.2553	0	0
El Salvador	2004	0	0	0.0246405	-0.490908	0.000375591	-0.451769	-0.480672	-0.069101	18.6035	33.3	56.0413	-54.29	31.6544	-0.452387	-12.6006	-3.88	-0.459435	-0.438858	-0.445511	-1.11086	-0.0139246	0	0.489005	-14.0915	0.889404	2.64681	61.107	69.7823	6.8	2.71767	-1.42776	-0.735316	0	0	-0.125124	0.201667	20.1667	0	0
El Salvador	2005	0	0	-0.0750128	-0.505208	-0.257205	-0.447229	-0.508674	-0.0337609	19.1972	34.1	59.5667	-53.09	31.4373	-0.546622	-13.5509	-3.88	-0.511981	-0.417251	-0.425625	-1.1201	-0.0863563	0	0.451694	-14.3642	2.68083	3.47762	61.648	69.7158	7.22	4.29476	-1.60081	-0.83087	0	0	-0.116053	0.204516	20.4516	0	0
El Salvador	2006	1	0	0.0966299	-0.691742	-0.0738027	-0.217	-0.335918	-0.168158	19.3343	34.8	59.1434	-52.8	31.2201	-1.10993	-13.5509	-3.96	-0.994653	-0.391725	-0.558743	-1.14091	-0.435909	0	0.431372	-14.8555	4.337	1.50707	62.187	73.4556	6.57	4.33269	-1.3982	-0.718993	1	0	-0.081874	0.21525	21.525	0	0
El Salvador	2007	0	0	0.0945089	-0.722936	0.087129	-0.259199	-0.423062	-0.00727073	14.7392	28.2	57.8833	-53.15	31.0029	-1.02477	-13.5509	-3.94	-0.944056	-0.376517	-0.581451	-1.1869	-0.362605	0	0.413373	-15.1083	1.8476	9.11435	62.774	77.6211	6.41	4.39536	-1.32035	-0.676008	0	0	-0.0983216	0.210085	21.0085	0	0
El Salvador	2008	0	0	0.112084	-0.694341	0.150921	-0.211958	-0.411014	0.0393931	15.276	31.5	64.1826	-49.75	30.7857	-1.1698	-13.5509	-3.91	-1.05629	-0.357323	-0.604975	-1.05382	-0.451319	0	0.548327	-14.2797	2.1544	5.0206	63.678	80.666	5.88	3.5023	-1.22179	-0.621588	0	0	-0.0852975	0.214175	21.4175	0	0
El Salvador	2009	0	1	0.0576467	-0.783322	0.28381	-0.0746135	-0.230228	-0.00711628	16.9067	32.2	58.0031	-48.3	30.5685	-0.715439	-13.5509	-3.93	-0.704975	-0.389115	-0.595776	-1.0823	-0.109199	0	0.580941	-14.0059	-2.10877	2.09486	64.57	66.0712	7.33	-0.0338953	-1.10325	-0.556135	0	1	-0.109111	0.206696	20.6696	0	0
El Salvador	2010	0	0	0.0715446	-0.86575	0.337437	-0.0123194	-0.258609	0.0588422	16.7212	32.6	66.6798	-47.87	30.3514	-1.02874	-13.5509	-3.91	-1.05966	-0.338134	-1.05966	-1.04358	0	0	0.561744	-13.6537	2.1542	-0.613406	65.452	73.5373	4.893	2.59792	-1.06302	-0.533922	0	0	-0.0788061	0.216214	21.6214	0	0
El Salvador	2011	1	0	0.0439498	-0.751709	0.403909	-0.109998	-0.247806	0.111001	14.7353	29.5	64.564	-49.66	30.1342	-0.832362	-13.5509	-3.75	-0.858471	-0.340077	-0.858142	-1.02838	-0.000328473	0	0.510127	-11.0894	3.77358	0.603931	66.325	79.2766	4.297	5.95334	-1.00883	-0.504002	1	0	-0.107907	0.207074	20.7074	0	0
El Salvador	2012	0	0	-0.0401937	-0.728603	0.228348	-0.134836	-0.412513	0.234584	16.1306	30.3	61.2283	-49.22	29.917	-0.771016	-13.5509	-3.71	-0.80368	-0.31405	-0.803376	-1.02529	-0.000303279	0	0.499903	-11.3457	2.8877	2.01124	67.187	77.6486	3.843	2.47555	-1.14996	-0.581927	0	0	-0.113983	0.205166	20.5166	0	0
El Salvador	2013	0	0	-0.0131476	-0.637214	0.227206	-0.121621	-0.349344	-0.0336589	13.9887	27.5	61.3246	-48.7	29.6998	-0.938919	-13.5509	-3.43	-0.983142	-0.309101	-0.982872	-0.994354	-0.000269894	0	0.492534	-10.5239	2.18295	1.11491	68.036	80.4512	3.693	0.631312	-1.17937	-0.598167	0	0	-0.119454	0.203448	20.3448	0	0
El Salvador	2014	0	0	0.152575	-0.469335	0.222213	-0.0252641	-0.375205	-0.02459	10.5492	24	60.2105	-51.3	29.4826	-1.05506	-13.5509	-3.33	-1.10569	-0.310598	-1.10545	-1.02927	-0.000239669	0	0.489004	-11.0041	1.7294	2.2409	68.874	78.1044	4.154	0.993231	-0.995043	-0.496387	0	0	-0.125844	0.201441	20.1441	0	0
El Salvador	2015	0	0	0.152256	-0.616808	0.0679869	-0.285931	-0.447839	-0.020496	10.7046	21	58.657	-52.74	29.2654	-0.850743	-13.5509	-3.39	-0.89231	-0.302659	-0.89231	-1.08926	0	0	0.540326	-11.4946	2.4	2.10998	69.7	76.5603	3.998	1.30762	-1.28413	-0.656011	0	0	-0.142141	0.196323	19.6323	0	0
El Salvador	2016	0	0	0.188607	-0.757979	-0.0506191	-0.343923	-0.556168	-0.104569	11.2046	20.7	58.8662	-52.23	29.0483	-1.02211	-13.5509	-3.38	-1.07764	-0.287357	-1.07764	-1.12218	0	0	0.568346	-11.4432	2.53906	1.98198	70.501	72.8191	4.418	0.657746	-1.49688	-0.773483	0	0	-0.129392	0.200326	20.0326	0	0
El Salvador	2017	0	0	0.154202	-0.873292	-0.169971	-0.387302	-0.534349	-0.26382	13.2457	25	74.8525	-47.48	28.8311	-0.88816	-13.5509	-3.25	-0.94038	-0.264971	-0.940288	-1.01189	-9.18745e-05	0	0.566916	-10.7856	2.24762	2.01688	71.275	74.3047	4.385	0.986566	-1.70163	-0.886539	0	0	-0.119621	0.203395	20.3395	0	0
El Salvador	2018	0	0	0.0289855	-0.930314	-0.0161869	-0.489994	-0.586435	-0.38916	12.2733	23.2	78.3957	-49.65	28.6139	-0.66365	-13.5509	-3.27	-0.703356	-0.258179	-0.703217	-1.08676	-0.000138908	0	0.563905	-11.0943	2.41244	1.5862	72.023	75.6336	4.006	1.71626	-1.8291	-0.95692	0	0	-0.133032	0.199183	19.9183	0	0
El Salvador	2019	0	0	0.117884	-0.866014	-0.0379504	-0.53108	-0.537863	-0.120228	11.3985	19.4	72.5916	-54.66	28.3967	-0.562349	-13.5509	-3.38	-0.591845	-0.249032	-0.591746	-1.2454	-9.96962e-05	0	0.566538	-12.0566	2.43747	2.59024	72.746	76.042	4.17	0.848015	-1.65483	-0.860699	0	0	-0.146357	0.194998	19.4998	0	0
El Salvador	2020	0	1	0.0697046	-0.777085	-0.0852432	-0.261267	-0.577636	-0.114992	12.152	23.7	86.1446	-48.35	28.1795	-0.764177	-13.5509	-3.35	-0.807389	-0.269461	-0.807334	-1.28395	-5.55754e-05	0	0.457916	-10.8719	-7.8931	1.55102	73.444	66.4595	5.008	0.653512	-1.55198	-0.803907	0	1	-0.106562	0.207497	20.7497	0	0
Estonia	2002	1	0	1.07295	0.791838	1.26314	0.667886	0.739191	0.927854	11.76	19.3	0.351824	-89.5	53.2747	-2.45691	-11.1204	-6.92	-0.655079	-0.13709	0	-4.31714	-0.655079	0	1.94393	-15.153	6.933	4.58926	69.116	123.282	10.026	4.80388	1.6823	0.981939	1	0	0.096135	0.271157	27.1157	0	0
Estonia	2003	1	0	1.07058	0.770818	1.1742	0.880271	0.922725	0.894786	11.4145	19.9	0.482331	-91.78	53.5039	-2.15206	-11.7821	-6.97	-0.532086	-0.132985	0	-3.82697	-0.532086	0	1.83749	-17.6313	7.5963	10.5122	68.989	122.745	11.288	3.88939	1.78603	1.03922	1	0	0.068056	0.262338	26.2338	0	0
Estonia	2004	1	0	1.09342	0.883018	1.22551	0.903344	0.982847	0.703926	11.072	20	0.582298	-91.74	53.733	-1.59775	-12.4437	-6.97	-0.611889	-0.123215	0	-3.27518	-0.611889	0	2.04527	-17.6067	6.8007	8.94666	68.862	129.95	10.248	4.68946	1.82617	1.06138	1	0	0.0395125	0.253374	25.3374	0	0
Estonia	2005	1	0	0.992169	0.903709	1.24709	0.93784	0.994831	0.605275	10.702	18.9	1.0877	-91.72	53.9621	-1.64238	-13.1054	-6.43	-0.844275	-0.104703	0	-2.97881	-0.844275	0	2.21472	-19.4617	9.52305	21.6702	68.735	135.913	8.033	5.92389	1.77916	1.03542	1	0	0.0164292	0.246124	24.6124	0	0
Estonia	2006	1	0	1.06822	1.12973	1.2937	1.14692	1.01234	0.736678	9.71394	17.2	1.33374	-91.34	54.1913	-1.6463	-13.7671	-5.81	-0.893003	-0.10503	0	-2.4368	-0.893003	0	2.13112	-16.8989	9.76257	10.3266	68.607	136.621	5.915	8.97864	2.09595	1.21035	1	0	-0.0271607	0.232434	23.2434	0	0
Estonia	2007	1	0	1.07301	1.12228	1.32278	1.00764	0.967808	0.63411	9.42282	18.6	1.19442	-93.73	54.4204	-1.57598	-14.4288	-6.29	-0.97103	-0.0982394	0	-2.48494	-0.97103	0	2.13208	-21.1358	7.57092	13.5105	68.479	133.981	4.592	12.3542	1.98389	1.14847	1	0	-0.0064235	0.238947	23.8947	0	0
Estonia	2008	0	1	1.09165	1.15544	1.38837	1.15764	0.952435	0.571974	11.4906	20.5	1.86665	-89.72	54.6495	-2.09539	-12.62	-5.84	-1.32202	-0.0952336	0	-2.14058	-1.32202	0	2.25428	-17.9868	-5.12531	8.12254	68.351	136.682	5.455	6.79511	2.07467	1.19859	0	1	-0.0033927	0.239899	23.9899	0	0
Estonia	2009	0	1	1.08552	1.12466	1.39269	1.00225	1.00068	0.567619	15.6019	24.2	6.16961	-83.8	54.8787	-1.57892	-10.8419	-5.54	-0.751768	-0.0976157	0	-2.1836	-0.751768	0	2.90491	-14.9751	-14.6302	9.50544	68.223	116.759	13.548	-0.387627	2.008	1.16178	0	1	-0.0294397	0.231718	23.1718	0	0
Estonia	2010	0	0	1.10565	1.15313	1.3882	1.07667	0.989536	0.661367	14.0726	25.3	8.05276	-90.24	55.1078	-1.55961	-14.4925	-7.1	-0.581538	-0.0814285	0	-2.93924	-0.581538	0	2.87067	-19.2776	2.44975	13.277	68.094	143.672	16.707	1.81654	2.09666	1.21073	0	0	0.0423843	0.254276	25.4276	0	0
Estonia	2011	1	0	1.13373	1.17581	1.38532	1.06727	1.04545	0.611041	14.0102	25.2	9.15124	-90.74	55.5088	-1.78519	-14.7443	-6.43	-0.718356	-0.0732569	0	-2.46038	-0.718356	0	2.65065	-19.7516	7.60697	4.8024	67.965	166.746	12.328	5.53917	2.11555	1.22117	1	0	0.0118511	0.244686	24.4686	0	0
Estonia	2012	1	0	1.11192	1.15094	1.41028	0.945922	1.0883	0.636465	15.5707	25	12.3417	-87.31	55.9098	-1.97053	-12.8324	-5.74	-0.824173	-0.0656474	0	-2.37842	-0.824173	0	2.64047	-20.3491	3.67202	7.69166	67.974	169.156	10.021	4.20553	2.08055	1.20184	1	0	0.0024921	0.241747	24.1747	0	0
Estonia	2013	0	0	1.11683	1.19137	1.43924	0.966788	1.18144	0.748215	15.5277	24.5	9.19729	-88.93	54.9118	-1.79924	-13.753	-6.27	-0.731734	-0.0525628	0	-2.54834	-0.731734	0	2.56248	-23.5637	1.75649	4.31394	68.122	164.602	8.631	4.12395	2.21094	1.27384	0	0	0.0133191	0.245147	24.5147	0	0
Estonia	2014	0	0	1.1703	1.36986	1.67061	1.01121	1.29877	0.780258	15.7008	25.3	11.1825	-87.58	55.3028	-1.76558	-13.5327	-5.79	-0.785909	-0.0476059	0	-2.33442	-0.785909	0	2.50501	-25.1801	3.32279	6.58512	68.269	157.954	7.352	2.85654	2.51202	1.44008	0	0	-0.004128	0.239668	23.9668	0	0
Estonia	2015	0	0	1.18692	1.30051	1.65832	1.03594	1.25537	0.613857	18.8734	28.2	15.4272	-81.45	55.6938	-1.44592	-12.7092	-4.97	-0.465477	-0.0380113	0	-2.41368	-0.465477	0	2.68907	-22.7939	1.83815	-3.06911	68.416	148.507	6.412	1.30644	2.40454	1.38074	0	0	-0.0316592	0.231021	23.1021	0	0
Estonia	2016	0	0	1.2082	1.19259	1.68796	1.0546	1.23109	0.662796	16.4715	27.2	13.047	-85.52	55.6993	-1.24687	-13.7797	-5.98	-0.31483	-0.0334953	0	-2.43964	-0.31483	0	2.86875	-23.2886	3.09302	3.76923	68.563	147.746	6.882	2.43853	2.39947	1.37794	0	0	-0.0162408	0.235864	23.5863	0	0
Estonia	2017	1	0	1.21454	1.24848	1.63404	1.07229	1.20263	0.642371	18.0192	27.5	14.1225	-84.87	57.0386	-1.73344	-14.0433	-5.49	-0.519487	-0.0309111	0	-2.38076	-0.519487	0	2.81957	-25.1035	5.63467	6.31893	68.717	144.636	5.807	3.7411	2.38831	1.37177	1	0	-0.0120971	0.237165	23.7165	0	0
Estonia	2018	1	0	1.1902	1.20346	1.54483	1.15056	1.4685	0.580416	20.2631	28.6	16.0854	-81.91	57.0386	-2.01785	-12.6557	-5.21	-0.798769	-0.0310401	0	-2.00233	-0.798769	0	3.01869	-28.4034	3.6997	4.08016	68.88	143.485	5.412	4.84907	2.43235	1.39609	1	0	-0.012922	0.236906	23.6906	0	0
Estonia	2019	1	0	1.1793	1.24273	1.58012	1.13977	1.52525	0.630198	23.764	31.3	28.1355	-71.04	57.0386	-1.80773	-7.91857	-4.22	-0.733625	-0.0315607	0	-1.36121	-0.733625	0	3.09194	-19.5844	3.72665	9.76819	69.051	140.352	4.514	3.82268	2.5024	1.43477	1	0	-0.0463778	0.226399	22.6398	0	0
Estonia	2020	0	1	1.16718	1.33509	1.52953	1.29901	1.58082	0.709817	28.0835	40.4	48.8761	-62.75	57.0386	-1.43024	-6.71088	-3.92	-0.374757	-0.0327853	0	-1.27385	-0.374757	0	2.34129	-16.6727	-2.88381	12.0148	69.229	137.393	6.956	0.753338	2.64255	1.51216	0	1	-0.0291975	0.231794	23.1794	0	0
Finland	2002	0	0	1.5529	1.90389	1.81565	2.0964	2.36901	1.75318	19.8745	29.5	26.4557	-57.68	73.5576	-0.420393	-3.87969	-6.79	-0.00748873	-0.0264519	0	-0.907826	0	-0.00748873	2.87679	-52.3381	1.68733	5.76697	82.503	69.3209	10.423	0.943133	-2.09224	-1.10222	0	0	0.0440771	0.254807	25.4807	0	0
Finland	2003	0	0	1.57246	1.95863	1.82632	2.194	2.37412	1.68702	19.2908	28.4	22.6088	-61.04	73.4908	-0.373953	-4.44295	-7.02	-0.00919395	-0.026723	0	-0.883042	0	-0.00919395	2.96472	-60.3604	2.0118	3.47606	82.638	68.0715	10.469	0.189983	-2.21272	-1.16875	0	0	0.0403443	0.253635	25.3635	0	0
Finland	2004	1	0	1.78361	1.93989	1.78043	2.14762	2.41011	1.61963	20.0675	31.1	29.8577	-59.19	73.4239	-0.300645	-5.0062	-6.82	-0.0199735	-0.0251265	0	-0.750839	-0.000151225	-0.0198223	3.15495	-55.0595	4.00538	3.43217	82.772	70.9678	10.358	0.60224	-2.661	-1.41627	1	0	0.0373513	0.252695	25.2695	0	0
Finland	2005	0	0	1.6871	1.95094	1.66159	2.12453	2.31472	1.59495	20.3291	31.5	33.2487	-54.04	73.357	-0.298003	-5.56946	-6.13	-0.0285274	-0.0246902	0	-0.627173	-0.000945371	-0.0275821	2.97044	-42.0678	2.77731	5.30501	82.905	76.589	9.602	0.929374	-2.77968	-1.4818	0	0	0.017217	0.246371	24.6371	0	0
Finland	2006	1	0	1.49407	1.95951	1.60182	2.16762	2.45411	1.50111	20.7975	31.2	27.2934	-57.73	73.4059	-0.373378	-6.13271	-6.41	-0.0684553	-0.0235554	0	-0.750275	-0.00186216	-0.0665931	2.90835	-50.5234	4.01957	2.13744	83.037	82.0006	8.935	0.92018	-2.18061	-1.15101	1	0	0.0252467	0.248893	24.8893	0	0
Finland	2007	1	0	1.46023	1.89685	1.54888	1.96812	2.38948	1.4887	20.4019	31.8	29.9384	-56.53	73.3437	-0.414693	-5.73439	-5.99	-0.0646092	-0.0236698	0	-0.652025	0	-0.0646092	2.65601	-58.3051	5.3128	8.57406	83.168	82.8632	6.854	2.7544	-2.24578	-1.187	1	0	0.0136281	0.245244	24.5244	0	0
Finland	2008	0	0	1.46308	1.91038	1.61093	2.04124	2.32085	1.44587	21.8188	34.6	35.8774	-53.52	73.3226	-0.387209	-5.33607	-5.71	-0.0231279	-0.0238231	0	-0.531324	0	-0.0231279	2.58781	-46.7766	0.784431	6.7927	83.299	86.1897	6.369	3.03759	-2.06304	-1.08609	0	0	0.0115391	0.244588	24.4588	0	0
Finland	2009	0	1	1.46527	1.96257	1.80946	2.22546	2.24072	1.45967	21.045	32.5	30.1086	-53.87	73.2556	-0.333185	-4.93776	-5.86	-0.0202676	-0.0242361	0	-0.583028	0	-0.0202676	2.52311	-30.9534	-8.07603	-3.48205	83.429	70.1279	8.249	1.77523	-1.96122	-1.02987	0	1	0.0089347	0.24377	24.377	0	0
Finland	2010	0	0	1.48671	1.96125	1.8731	2.22389	2.15167	1.42361	22.6976	33.4	29.9911	-55.19	73.1885	-0.504266	-4.53944	-6.22	-0.102268	-0.0235615	0	-0.707298	-0.0264536	-0.075814	2.6649	-52.4121	3.16829	4.8996	83.77	75.4612	8.394	0.348873	-1.97357	-1.03669	0	0	0.0329512	0.251313	25.1313	0	0
Finland	2011	0	0	1.50755	1.93954	1.81333	2.23519	2.19192	1.39347	23.1281	35.1	32.8917	-52.87	73.3009	-0.532649	-4.14112	-5.83	-0.127636	-0.0221127	0	-0.594283	-0.0274872	-0.100149	3.00765	-44.9853	2.39039	-2.18406	84.313	78.7159	7.781	2.60093	-2.33484	-1.23617	0	0	0.0203106	0.247343	24.7343	0	0
Finland	2012	0	1	1.6007	1.94403	1.82159	2.21031	2.22685	1.40077	25.4824	38.7	40.5621	-47.7	73.4108	-0.577536	-3.7428	-5.71	-0.16953	-0.020188	0	-0.591593	-0.0369285	-0.132601	2.96909	-37.2107	-1.52284	1.91512	84.841	79.4304	7.689	2.94535	-2.19372	-1.15825	0	1	0.0380431	0.252912	25.2912	0	0
Finland	2013	0	1	1.57362	1.95568	1.84167	2.18062	2.20024	1.38517	26.6531	38.5	35.968	-46.96	73.5207	-0.498563	-3.34449	-5.67	-0.109654	-0.0168982	0	-0.595431	-0.0408992	-0.0687546	2.9254	-44.9075	-0.979741	-1.83489	85.125	77.4852	8.193	2.56139	-2.09353	-1.10293	0	1	0.0327778	0.251259	25.1259	0	0
Finland	2014	0	1	1.54184	2.12476	1.87766	2.02505	2.15927	1.2822	27.1549	41.2	38.5804	-46.23	73.6306	-0.483087	-2.94617	-5.81	-0.0890012	-0.0143158	0	-0.559857	-0.0418787	-0.0471225	2.89378	-40.457	-0.478068	6.41537	85.175	74.6278	8.663	1.64467	-2.17896	-1.1501	0	1	0.0436793	0.254682	25.4682	0	0
Finland	2015	0	0	1.5437	2.05304	1.82573	1.84316	2.21565	1.028	27.9956	43.2	44.5012	-43.46	73.7356	-0.445868	-2.54785	-5.5	-0.0502784	-0.012082	0	-0.62868	-0.0250864	-0.025192	2.91067	-40.8359	0.466504	7.53801	85.225	71.9618	9.376	1.6327	-2.22216	-1.17396	0	0	0.0460139	0.255416	25.5416	0	0
Finland	2016	0	0	1.5321	2.00772	1.80655	1.84162	2.18631	0.982592	27.5689	42.4	44.2315	-44.22	73.7356	-0.410119	-2.14953	-5.54	-0.027556	-0.0103504	0	-0.678537	-0.00386684	-0.0236892	3.11009	-46.9544	2.57193	2.18952	85.275	71.7222	8.818	0.0551954	-2.28246	-1.20725	0	0	0.0444409	0.254922	25.4922	0	0
Finland	2017	0	0	1.55955	2.02407	1.81227	1.97728	2.16234	1.06381	29.4198	44.4	46.614	-42.22	73.7332	-0.453772	-2.14953	-5.34	-0.0795438	-0.0095002	0	-0.629334	-0.0160206	-0.0635231	2.97856	-46.2805	3.30337	6.66137	85.325	75.9388	8.64	0.836046	-2.05843	-1.08355	0	0	0.0471558	0.255774	25.5774	0	0
Finland	2018	0	0	1.58935	2.0344	1.77911	2.01388	2.17176	0.89189	29.7781	44.2	45.741	-42.34	73.7332	-0.563373	-2.61682	-5.37	-0.0884183	-0.00993941	0	-0.630957	-0.0281172	-0.0603011	2.95293	-56.8639	1.19298	-3.84457	85.382	79.1436	7.361	1.98706	-2.33654	-1.23711	0	0	0.0495917	0.256539	25.6539	0	0
Finland	2019	0	0	1.563	2.01263	1.84047	1.97281	2.11393	0.835259	30.9892	45.4	46.4434	-39.79	73.7308	-0.365207	-2.80374	-5.19	-0.0423693	-0.0110121	0	-0.615143	-0.0306156	-0.0117537	2.81745	-48.466	1.34974	6.09708	85.446	80.5642	6.695	1.48186	-2.40777	-1.27644	0	0	0.045062	0.255117	25.5117	0	0
Finland	2020	0	1	1.60951	2.01859	1.8509	1.901	2.17044	0.981825	30.3824	47.3	51.8681	-39.27	73.7284	-0.289254	-2.80374	-5.07	-0.0242379	-0.0122059	0	-0.580029	-0.0157739	-0.00846403	2.73971	-40.8841	-2.49104	-0.939114	85.517	72.1846	7.759	1.63842	-2.33053	-1.23379	0	1	0.0455223	0.255261	25.5261	0	0
France	2002	0	0	1.15434	1.21287	0.975889	1.54408	1.19159	0.924183	4.07443	8.7	12.4567	-52.82	28.333	-0.0568379	-16.177	-4.35	-0.0106623	-0.0608759	0	-0.49287	-0.0101897	-0.000472606	2.43794	-493.041	1.06775	3.45414	76.38	55.1325	8.702	2.06428	4.34571	2.45258	0	0	-0.257409	0.160121	16.0121	0	0
France	2003	0	0	1.12266	1.33329	1.21546	1.65109	1.30576	0.179551	4.20037	8.8	12.0654	-53.04	28.5239	-0.051249	-16.3593	-4.43	-0.0085499	-0.0603439	0	-0.423523	-0.00828901	-0.000260891	2.37185	-490.117	0.967827	2.30782	76.632	52.5989	8.306	1.80138	4.40252	2.48394	0	0	-0.25688	0.160287	16.0287	0	0
France	2004	0	0	1.45646	1.42519	1.21646	1.75563	1.31116	0.345115	4.23937	8.9	12.0693	-52.75	28.7461	-0.040626	-16.5417	-4.38	-0.00782442	-0.056429	0	-0.387857	-0.00770925	-0.000115169	2.42473	-490.674	2.86825	1.68777	76.883	53.7498	8.914	1.63364	4.4316	2.5	0	0	-0.259753	0.159385	15.9384	0	0
France	2005	0	0	1.47677	1.40783	1.24496	1.66645	1.35754	0.399724	4.41117	8.6	10.6199	-52.62	28.9532	-0.0417273	-16.724	-4.32	-0.00936009	-0.0544995	0	-0.396343	-0.00919273	-0.00016736	2.37373	-489.377	1.88857	3.88373	77.13	55.8228	8.882	1.9621	4.27389	2.41292	0	0	-0.262099	0.158648	15.8648	0	0
France	2006	0	0	1.29872	1.46217	1.23982	1.62848	1.45506	0.595506	4.15122	8.5	11.7901	-52.21	29.1597	-0.0481575	-16.11	-4.14	-0.0116643	-0.0523409	0	-0.384958	-0.0113343	-0.000330026	2.31574	-475.481	2.71406	3.40646	77.377	57.8693	8.832	1.99738	4.19873	2.37142	0	0	-0.266265	0.157339	15.7339	0	0
France	2007	0	0	1.25977	1.45637	1.28757	1.46457	1.456	0.563001	4.6057	9.4	12.5601	-51.99	29.3663	-0.0484835	-15.496	-4	-0.0105353	-0.0517746	0	-0.344362	-0.0101937	-0.000341658	2.23059	-471.195	2.53048	3.15449	77.621	58.1526	8.008	2.38503	4.00673	2.26541	0	0	-0.268496	0.156638	15.6638	0	0
France	2008	0	0	1.30479	1.49627	1.28425	1.57403	1.39503	0.543759	5.12838	10.5	13.6875	-51.14	29.5728	-0.0539801	-14.33	-4.02	-0.0146065	-0.0523899	0	-0.320882	-0.0140984	-0.000508165	2.2005	-464.19	0.380171	2.32327	77.868	59.1798	7.386	2.3008	4.03116	2.2789	0	0	-0.262703	0.158458	15.8458	0	0
France	2009	0	1	1.24454	1.44576	1.2147	1.47705	1.42997	0.512013	5.60355	11.2	13.9254	-51.13	29.7794	-0.0494586	-14.2352	-3.95	-0.00907365	-0.0552273	0	-0.343574	-0.00834493	-0.000728728	2.24254	-460.384	-2.82455	0.682311	78.117	52.1991	9.122	0.105961	4.20979	2.37753	0	1	-0.262883	0.158402	15.8401	0	0
France	2010	0	0	1.20286	1.49973	1.31016	1.46266	1.48776	0.681088	5.96342	11.9	14.581	-50.09	29.9859	-0.0546571	-14.289	-4	-0.00955821	-0.0547316	0	-0.367236	-0.00866249	-0.000895721	2.27501	-467.152	2.00032	1.46962	78.369	56.5876	9.279	1.08945	4.19729	2.37062	0	0	-0.256602	0.160374	16.0374	0	0
France	2011	0	0	1.17067	1.42973	1.15604	1.39231	1.53777	0.602993	5.54625	10.6	12.4195	-49.55	30.1382	-0.0486924	-15.073	-3.84	-0.00999143	-0.0530532	0	-0.33987	-0.00990361	-8.78204e-05	2.30707	-448.202	2.43758	1.54005	78.622	60.6056	9.228	0.851478	4.17633	2.35905	0	0	-0.268515	0.156633	15.6632	0	0
France	2012	0	0	1.23811	1.43693	1.12417	1.37338	1.47197	0.554942	6.13881	12.3	15.744	-49.6	30.2905	-0.048361	-14.0315	-3.83	-0.0118268	-0.0526363	0	-0.38342	-0.0117569	-6.98999e-05	2.3277	-445.343	0.183835	1.2279	78.878	61.659	9.841	1.08205	4.23066	2.38905	0	0	-0.259784	0.159375	15.9375	0	0
France	2013	0	0	1.2192	1.40236	1.14989	1.48205	1.30433	0.448744	6.57168	13.4	17.959	-49.18	30.4429	-0.0481698	-13.5785	-3.82	-0.00927966	-0.0493941	0	-0.380682	-0.00924213	-3.75225e-05	2.40137	-441.982	0.781756	1.18823	79.135	61.8192	9.913	0.747876	4.20252	2.37351	0	0	-0.255752	0.160641	16.0641	0	0
France	2014	0	0	1.21813	1.4535	1.07407	1.41287	1.28799	0.300568	6.39995	13.2	17.4358	-47.07	30.5952	-0.0462252	-13.6485	-3.63	-0.00704481	-0.0458447	0	-0.353225	-0.00701752	-2.72947e-05	2.38976	-412.775	0.997833	0.176974	79.394	62.1993	10.273	0.570795	4.15072	2.34491	0	0	-0.263279	0.158277	15.8277	0	0
France	2015	0	0	1.20674	1.3668	1.11581	1.41732	1.24783	0.0977598	6.629	13.3	16.7046	-47.41	30.7475	-0.0409913	-14.058	-3.65	-0.00394775	-0.0443759	0	-0.434405	-0.00394675	-9.98429e-07	2.54092	-421.087	1.06675	1.76596	79.655	63.5047	10.354	1.13444	3.92637	2.22103	0	0	-0.261281	0.158905	15.8904	0	0
France	2016	0	0	1.13691	1.35156	1.05862	1.38062	1.32829	-0.10635	7.22417	14.2	18.4107	-48.52	30.8998	-0.0401902	-13.218	-3.54	-0.00301199	-0.0401031	0	-0.446421	-0.0030109	-1.08906e-06	2.87541	-429.59	0.860031	1.442	79.917	63.3428	10.057	0.517258	3.85908	2.18388	0	0	-0.263835	0.158102	15.8102	0	0
France	2017	0	0	1.15272	1.39806	1.14648	1.30891	1.22453	0.265702	7.22621	14.1	17.3981	-49.16	31.0521	-0.036225	-13.473	-3.46	-0.00404434	-0.0379968	0	-0.448122	-0.00404256	-1.77894e-06	2.92732	-443.854	2.08361	1.68928	80.18	65.3958	9.409	0.586343	3.96769	2.24385	0	0	-0.26815	0.156747	15.6747	0	0
France	2018	0	0	1.15753	1.39622	1.1475	1.41972	1.28155	0.0138941	7.32352	15.2	20.4545	-47.31	31.2044	-0.0429051	-13.4615	-3.37	-0.00677053	-0.0380246	0	-0.421263	-0.00676725	-3.27801e-06	3.01194	-429.643	1.64591	2.78594	80.444	66.8023	9.018	1.11459	3.91659	2.21563	0	0	-0.266795	0.157173	15.7173	0	0
France	2019	0	0	1.115	1.37148	1.43154	1.33822	1.24806	0.271341	7.55562	15.5	20.6518	-47.74	31.3567	-0.0337878	-13.106	-3.26	-0.00543453	-0.0385162	0	-0.43965	-0.00543453	0	2.98339	-423.033	2.02745	1.96487	80.709	66.429	8.415	1.21052	3.85856	2.18359	0	0	-0.268959	0.156493	15.6493	0	0
France	2020	0	1	1.06575	1.29873	1.18946	1.20425	1.12262	0.280993	7.78974	16.8	24.3856	-46.85	31.509	-0.0266319	-12.3358	-3.18	-0.0256011	-0.0415191	-0.0229569	-0.42499	-0.00264417	0	2.7952	-373.91	-7.44065	0.731472	80.975	58.8389	8.009	2.97798	3.94069	2.22894	0	1	-0.263884	0.158087	15.8087	0	0
Georgia	2002	1	0	-0.505115	-1.08406	-0.736232	-0.712642	-1.26414	-1.19204	25.3638	56.8	92.4831	-49.59	39.9044	-0.565805	-3.2247	-4.8	-0.363801	-1.03393	-0.0917572	-1.75132	-0.0762757	-0.195768	0	-4.9725	5.47402	4.72349	52.441	71.6291	12.59	5.91907	2.34908	1.35011	1	0	0.0349108	0.251928	25.1928	0	0
Georgia	2003	1	0	-0.177866	-0.912254	-0.617243	-0.198498	-0.650767	-1.29921	23.851	55.3	90.743	-52.15	39.9934	-0.783503	-3.18943	-4.6	-0.482263	-0.820103	-0.117103	-1.65969	-0.218515	-0.146645	0	-5.9148	11.057	8.39036	52.83	77.6334	11.51	3.42601	2.28593	1.31524	1	0	0.0289959	0.250071	25.0071	0	0
Georgia	2004	1	0	-0.0782669	-0.74977	-0.43742	-0.556115	-0.459568	-0.864118	23.2055	54.5	87.0566	-53.78	40.0823	-0.809469	-3.15415	-4.47	-0.463611	-0.687817	-0.121039	-1.43005	-0.13348	-0.209092	0	-6.46	5.79268	9.61362	53.218	79.0407	12.62	8.43369	2.59801	1.48756	1	0	0.0086579	0.243683	24.3683	0	0
Georgia	2005	1	0	-0.0903711	-0.695963	-0.604644	-0.427874	-0.212854	-0.755905	12.2879	41.5	82.9833	-64.42	40.1712	-0.775238	-3.11887	-4.16	-0.451998	-0.555548	-0.117623	-1.52433	-0.157275	-0.177099	0.806004	-7.0704	9.59114	7.06775	53.605	84.5296	13.81	7.9351	2.61554	1.49724	1	0	-0.0453776	0.226713	22.6713	0	0
Georgia	2006	1	0	-0.09271	-0.461667	-0.128548	-0.244788	0.0501525	-0.966099	12.3051	37.2	74.1265	-70.41	40.2602	-0.954779	-3.12461	-4.06	-0.537097	-0.458981	-0.116232	-1.45781	-0.057825	-0.363039	0.873977	-7.6231	9.42148	15.124	53.992	89.1254	13.57	8.44731	2.66401	1.52401	1	0	-0.0677932	0.219673	21.9673	0	0
Georgia	2007	1	0	-0.23041	-0.344459	0.298658	0.1216	-0.128835	-0.645899	11.7926	36.2	81.9872	-70.69	40.3491	-0.920367	-3.13034	-3.98	-0.526996	-0.404677	-0.135319	-1.42024	-0.046163	-0.345514	1.03716	-8.5013	12.5756	18.5993	54.379	88.3934	13.28	9.46751	2.5798	1.47751	1	0	-0.0670256	0.219914	21.9914	0	0
Georgia	2008	0	0	-0.256854	-0.262944	0.475643	0.305029	-0.102076	-0.919675	12.5813	36.3	84.8102	-66.79	40.438	-0.782966	-3.13607	-3.49	-0.448988	-0.427361	-0.12105	-1.01992	-0.0550889	-0.272849	1.31878	-7.2711	2.42161	12.5222	54.765	86.2982	17.87	9.59233	2.63244	1.50657	0	0	-0.0998934	0.209591	20.9591	0	0
Georgia	2009	0	1	-0.188876	-0.199315	0.508792	0.297785	-0.122036	-0.965525	12.3419	36.7	86.6676	-67	40.527	-0.792324	-3.08557	-3.73	-0.491221	-0.497536	-0.146401	-1.44742	-0.0347519	-0.310069	1.06802	-8.0192	-3.65075	6.13733	55.15	78.193	20.71	-2.13577	2.5053	1.43637	0	1	-0.0690057	0.219292	21.9292	0	0
Georgia	2010	1	0	-0.160913	-0.205985	0.58664	0.327388	0.0123016	-0.718321	11.4997	39.1	92.6008	-64.71	40.6159	-1.33825	-3.03507	-3.55	-0.895224	-0.497333	-0.110579	-1.26422	-0.0305528	-0.754092	1.13686	-7.4613	6.24641	7.41066	55.535	81.6734	20.203	15.9058	2.64748	1.51488	1	0	-0.0563843	0.223256	22.3256	0	0
Georgia	2011	1	0	-0.172699	-0.119617	0.651625	0.578813	0.11752	-0.656952	8.88816	31.5	77.4226	-72.77	40.6159	-1.89852	-2.98457	-3.75	-1.35832	-0.503044	-0.124562	-1.32466	-0.039911	-1.19384	1.04064	-8.5701	7.93434	7.56101	55.919	85.4659	19.632	9.17171	2.48098	1.42294	1	0	-0.0608413	0.221856	22.1856	0	0
Georgia	2012	1	0	0.0215808	-0.00621735	0.664131	0.630566	0.397421	-0.680454	8.27726	28.7	74.4766	-74.47	40.6159	-1.08429	-2.93407	-3.68	-0.71322	-0.490784	-0.0442337	-1.36917	-0.0366671	-0.632319	0.97502	-9.85	6.57883	5.73087	56.303	89.7349	19.653	0.291166	2.44246	1.40167	1	0	-0.0986147	0.209993	20.9993	0	0
Georgia	2013	1	0	0.138751	0.00490996	0.725805	0.606947	0.46362	-0.441366	11.5663	32.4	82.227	-70.89	40.6159	-0.797122	-2.88357	-3.99	-0.537669	-0.492449	-0.06598	-1.50204	-0.0299773	-0.441711	1.02994	-10.6893	5.13289	5.97433	56.685	93.8139	19.416	-0.650965	2.36556	1.35921	1	0	-0.0713849	0.218545	21.8544	0	0
Georgia	2014	1	0	0.284589	0.224749	0.760028	0.424184	0.828279	-0.321508	10.4733	30.7	80.3716	-72.52	40.6159	-0.522067	-2.83307	-4.08	-0.333416	-0.469961	-0.0620574	-1.63929	-0.0265621	-0.244797	1.01695	-11.7087	4.09049	10.2242	57.067	94.9507	17.439	4.5899	2.24936	1.29505	1	0	-0.0777479	0.216546	21.6546	0	0
Georgia	2015	1	0	0.274659	0.222805	0.750866	0.263112	0.700735	-0.472154	8.48919	27.5	78.0371	-75.55	40.6159	-0.534094	-2.78257	-4.18	-0.384303	-0.475368	-0.0802858	-2.18888	-0.00917059	-0.294846	0.9384	-11.9537	3.35102	11.3986	57.448	97.0163	16.506	5.37742	2.12484	1.22629	1	0	-0.0609678	0.221816	22.1816	0	0
Georgia	2016	1	0	0.295699	0.335772	0.86149	0.420896	0.713531	-0.320115	7.97054	27.2	80.6874	-75.19	40.6159	-0.572436	-2.73207	-4.2	-0.451743	-0.534054	-0.0649428	-2.39985	-0.00313589	-0.383665	0.953129	-12.1962	3.45022	10.747	57.837	94.9263	16.604	2.27482	1.9881	1.1508	1	0	-0.0488081	0.225635	22.5635	0	0
Georgia	2017	1	0	0.265135	0.262743	0.94906	0.481504	0.759496	-0.375215	7.42295	27.5	80.6424	-74.39	40.6159	-0.472314	-2.36458	-4.04	-0.367734	-0.509535	-0.0791955	-2.35681	-0.00403178	-0.284507	1.50872	-12.1578	5.1599	11.7184	58.231	102.584	13.939	7.54674	2.14255	1.23607	1	0	-0.0633785	0.221059	22.1059	0	0
Georgia	2018	1	0	0.229046	0.270511	1.03199	0.518134	0.724817	-0.447563	5.5779	27.4	82.606	-74.57	40.6159	-0.451236	-2.22109	-3.82	-0.353339	-0.474684	-0.0719032	-2.21696	-0.00419565	-0.27724	1.49137	-12.0361	6.06204	7.28402	58.632	109.848	12.667	3.48482	2.11093	1.21862	1	0	-0.0771899	0.216721	21.6721	0	0
Georgia	2019	1	0	0.168093	0.248692	1.02652	0.766199	0.716545	-0.498172	4.8125	24.7	76.0791	-77.24	40.6159	-0.603606	-2.70452	-3.83	-0.489502	-0.480286	-0.0750484	-2.46977	-0.00356534	-0.410888	1.34275	-12.7666	5.38072	7.92523	59.039	117.81	11.565	3.99568	2.27995	1.31194	1	0	-0.0735456	0.217866	21.7866	0	0
Georgia	2020	0	1	0.0556091	0.222878	1.00117	0.716738	0.601493	-0.429611	4.6068	23.4	74.7827	-77.97	40.6159	-0.925524	-2.84486	-3.98	-0.714548	-0.531528	-0.0766969	-2.6951	-0.00162641	-0.636225	1.28343	-12.4224	-6.29047	3.39838	59.453	92.8911	11.73	6.84793	1.99687	1.15563	0	1	-0.0530677	0.224297	22.4297	0	0
Germany	2002	0	1	1.41403	1.63439	1.51094	1.66002	1.88874	1.09602	2.75039	4.4	8.38887	-83.28	32.5775	-0.104826	-41.5492	-3.94	-0.056176	-0.0933634	0	-0.8167	-0.0561634	-1.25931e-05	2.47086	-1039.52	-0.22831	2.43861	75.374	58.3326	8.482	1.49931	-1.34166	-0.687774	0	1	-0.290773	0.149642	14.9642	0	0
Germany	2003	0	1	1.41355	1.63758	1.50188	1.35741	1.87576	0.577859	3.3999	5.4	8.41124	-82.93	32.598	-0.0963792	-40.1363	-3.96	-0.0497756	-0.0924963	0	-0.710086	-0.0497684	-7.13004e-06	2.59909	-1036.83	-0.529929	2.58023	75.577	58.9145	9.779	1.32178	-1.5892	-0.824461	0	1	-0.29219	0.149197	14.9197	0	0
Germany	2004	0	0	1.49604	1.6202	1.46957	1.46715	1.84007	0.638884	3.79677	6.3	10.3016	-82.23	32.6175	-0.138404	-38.8289	-3.94	-0.0565787	-0.0879511	0	-0.639793	-0.056567	-1.16649e-05	2.47687	-1014.84	1.16237	-0.715503	75.779	62.9065	10.727	1.15506	-2.11936	-1.11719	0	0	-0.288879	0.150237	15.0237	0	0
Germany	2005	0	0	1.48583	1.6522	1.51511	1.50052	1.87544	0.888915	4.69384	7.3	11.2629	-81.56	32.6342	-0.138855	-37.6986	-3.89	-0.0682777	-0.0878763	0	-0.650382	-0.0682516	-2.60829e-05	2.40522	-984.006	0.885697	2.06799	75.98	66.9531	11.193	0.534317	-1.8787	-0.984309	0	0	-0.285233	0.151382	15.1382	0	0
Germany	2006	1	0	1.36523	1.77009	1.56891	1.64598	1.79364	1.02507	5.68867	8.6	12.3839	-80.82	32.6537	-0.163911	-37.133	-3.86	-0.085736	-0.0826676	0	-0.655833	-0.0856874	-4.85934e-05	2.32679	-983.775	3.85574	2.8705	76.179	72.7592	10.277	0.447	-2.43434	-1.29112	1	0	-0.279113	0.153304	15.3304	0	0
Germany	2007	0	0	1.33648	1.75559	1.61617	1.63131	1.72652	0.995824	6.86097	10.5	15.0125	-80.71	32.6742	-0.1709	-30.1449	-3.56	-0.0712636	-0.0817973	0	-0.580821	-0.0711818	-8.18472e-05	2.15675	-958.891	2.89011	1.45942	76.378	74.8838	8.732	1.83956	-2.41352	-1.27961	0	0	-0.278856	0.153385	15.3385	0	0
Germany	2008	0	0	1.33678	1.73403	1.48888	1.51406	1.7459	0.943831	7.2142	10.2	15.6434	-79.92	32.6937	-0.305969	-36.3264	-3.57	-0.138618	-0.0825335	0	-0.560553	-0.138505	-0.000112467	2.14351	-952.613	0.910403	0.812719	76.575	76.1014	7.508	0.94784	-2.5027	-1.32886	0	0	-0.27988	0.153063	15.3063	0	0
Germany	2009	0	1	1.33496	1.64867	1.51645	1.57511	1.74621	0.859903	7.85165	10.7	17.0317	-79.3	32.7113	-0.158935	-37.0916	-3.53	-0.0796055	-0.0877514	0	-0.581783	-0.0795822	-2.33324e-05	2.22662	-878.51	-5.54516	1.62946	76.771	66.1153	7.88	1.9947	-2.41639	-1.2812	0	1	-0.28632	0.151041	15.1041	0	0
Germany	2010	1	0	1.29778	1.6375	1.57069	1.51569	1.76643	0.796834	8.4872	11.6	17.6238	-78.76	32.7309	-0.195522	-30.8327	-3.57	-0.0761801	-0.0841697	0	-0.637078	-0.0760803	-9.98675e-05	2.11387	-932.236	4.14677	2.48079	76.966	73.8626	7.043	0.682499	-2.20516	-1.16457	1	0	-0.26936	0.156367	15.6367	0	0
Germany	2011	1	0	1.34921	1.61822	1.54887	1.50014	1.74195	0.842218	8.83602	12.5	21.183	-79.67	32.7375	-0.228555	-34.04	-3.26	-0.0986197	-0.0806394	0	-0.579048	-0.0984645	-0.00015518	2.14564	-897.278	3.75797	2.55006	77.16	78.4073	5.967	1.23193	-2.18916	-1.15573	1	0	-0.282376	0.152279	15.2279	0	0
Germany	2012	0	0	1.39374	1.66923	1.52908	1.53098	1.81763	0.775621	9.70804	13.6	23.7361	-79.68	32.7452	-0.164856	-31.4459	-3.27	-0.0788985	-0.077765	0	-0.653897	-0.0787684	-0.000130113	2.08875	-899.616	0.474291	1.81893	77.17	79.3005	5.372	1.43208	-2.2096	-1.16702	0	0	-0.272471	0.15539	15.539	0	0
Germany	2013	0	0	1.40613	1.64198	1.54434	1.51041	1.798	0.927984	9.6701	13.6	24.757	-80.23	32.719	-0.125056	-23.6692	-3.32	-0.0597987	-0.0751963	0	-0.656744	-0.0596792	-0.000119545	2.03123	-918.056	0.386225	1.76466	77.18	77.5644	5.316	1.99503	-2.22764	-1.17698	0	0	-0.261709	0.15877	15.877	0	0
Germany	2014	0	0	1.4363	1.8502	1.69704	1.66482	1.81229	0.925186	9.86437	14	26.8209	-79.39	32.7228	-0.0973613	-29.2599	-3.11	-0.0398221	-0.0700289	0	-0.624702	-0.0397538	-6.83239e-05	1.9626	-885.854	2.1695	0.43766	77.19	76.8303	4.979	1.90082	-2.22213	-1.17394	0	0	-0.27492	0.154621	15.4621	0	0
Germany	2015	0	0	1.42214	1.75914	1.71191	1.6564	1.77583	0.687515	9.87811	14.6	30.0329	-79.59	32.7323	-0.076012	-27.8817	-3.08	-0.0272785	-0.067136	0	-0.751644	-0.0272785	0	1.89159	-888.648	1.65272	1.82321	77.2	77.7914	4.612	1.6854	-2.44075	-1.29465	0	0	-0.265617	0.157543	15.7543	0	0
Germany	2016	0	0	1.36467	1.5833	1.80655	1.66019	1.78129	0.667541	9.84406	14.2	30.0193	-80.3	32.6855	-0.0642203	-22.8439	-3.02	-0.0185492	-0.0638596	0	-0.754551	-0.0185492	0	1.8285	-888.623	2.29471	1.6432	77.224	75.9846	4.104	1.25626	-2.58886	-1.37644	0	0	-0.263377	0.158246	15.8246	0	0
Germany	2017	0	0	1.43248	1.57407	1.77526	1.61311	1.79698	0.574381	9.90878	15.2	34.0095	-80.28	32.6845	-0.0682637	-25.9331	-2.95	-0.0235605	-0.0612707	0	-0.725015	-0.0235605	0	1.59031	-875.51	2.71602	2.89088	77.261	77.5666	3.781	1.46799	-2.78897	-1.48693	0	0	-0.263132	0.158323	15.8323	0	0
Germany	2018	0	0	1.44312	1.59138	1.75633	1.52356	1.8984	0.577865	10.1488	16	35.6372	-79.5	32.6836	-0.0847655	-25.1599	-2.85	-0.0278581	-0.0612938	0	-0.674875	-0.0278581	0	1.74088	-846.424	1.11644	4.00421	77.312	79.2277	3.384	1.86533	-2.82107	-1.50465	0	0	-0.266398	0.157298	15.7297	0	0
Germany	2019	0	0	1.35403	1.58132	1.71494	1.49535	1.8651	0.54854	10.4147	17.1	40.5775	-78.08	32.6827	-0.092626	-24.1052	-2.76	-0.0477269	-0.0615163	0	-0.66702	-0.0195252	-0.0282016	1.72903	-794.261	0.987893	1.90699	77.376	79.1337	3.163	2.01598	-2.90058	-1.54855	0	0	-0.262256	0.158598	15.8598	0	0
Germany	2020	0	1	1.37391	1.52013	1.57793	1.31369	1.82534	0.645049	11.2901	18.5	44.8396	-76.68	32.6827	-0.0767454	-24.1052	-2.69	-0.0396521	-0.0634831	0	-0.648473	-0.0100689	-0.0295832	1.66769	-746.289	-4.09514	4.48667	77.453	72.9933	3.881	1.75505	-2.81076	-1.49896	0	1	-0.259152	0.159573	15.9573	0	0
Ghana	2002	1	0	0.0284165	0.0232138	-0.508186	-0.0885787	-0.34279	-0.159934	56.1911	65.7	69.428	-36.2	38.0921	-13.4249	-3.41997	-4.43	-12.8785	-1.45783	-10.0684	-2.48033	-0.517287	-2.29281	2.21031	-24.9698	4.5	0.955694	45.275	97.4892	8.695	22.8186	-3.21828	-1.72398	1	0	0.801354	0.492643	49.2643	1	0
Ghana	2003	1	0	0.271764	0.00786069	-0.280945	-0.290672	-0.311427	0.0291866	56.6756	64.5	66.2785	-37.26	37.6941	-15.6198	-3.50949	-4.01	-15.5781	-1.42973	-14.2032	-2.00915	-0.430091	-0.944846	3.51131	-24.5869	5.2	1.79164	45.951	97.2871	7.72	28.7044	-2.49348	-1.32377	1	0	0.949878	0.539289	53.9289	1	0
Ghana	2004	1	0	0.117705	-0.126287	-0.380256	-0.351197	-0.279528	0.040791	55.3991	62.4	87.6552	-36.61	37.296	-12.3974	-3.59901	-3.75	-12.3311	-1.37785	-11.0778	-1.69727	-0.546174	-0.707191	3.90472	-24.4388	5.6	1.56811	46.63	99.6703	6.756	14.3502	-2.18402	-1.15289	1	0	0.739981	0.473367	47.3367	1	0
Ghana	2005	1	0	0.197485	-0.134525	-0.183413	-0.211272	-0.368746	0.169719	53.9782	61.4	83.1246	-37.53	36.898	-11.7318	-3.68853	-3.5	-11.3443	-1.31252	-9.4795	-1.54326	-0.61466	-1.2501	4.14144	-25.0129	5.9	1.34924	47.308	98.1715	5.816	14.9637	-2.04141	-1.07415	1	0	0.64088	0.442243	44.2243	1	0
Ghana	2006	1	0	0.407593	0.0564966	-0.107714	0.0275785	-0.0141816	0.00639619	48.9086	58.6	66.7687	-43.64	36.5	-7.57618	-3.77805	-3.57	-7.02076	-1.2529	-5.0392	-1.02741	-0.387617	-1.59394	2.13021	-26.9111	6.39991	3.04529	47.988	64.5191	4.897	84.6835	-1.59939	-0.830086	1	0	0.327752	0.3439	34.39	0	0
Ghana	2007	1	0	0.49732	0.0392334	-0.112005	0.086275	0.0381477	-0.0730613	49.0937	54.5	53.5483	-45.51	36.1019	-8.82815	-3.86757	-3.37	-8.08357	-1.22102	-6.2854	-0.951379	-0.36135	-1.43682	1.7416	-27.3804	4.34682	5.57119	48.669	65.3543	5.092	16.1042	-1.16941	-0.592665	1	0	0.375352	0.35885	35.885	0	0
Ghana	2008	1	0	0.431884	-0.062382	-0.111345	-0.0305091	-0.0774585	-0.029516	45.9747	57.3	74.6252	-46.38	35.7039	-9.1619	-3.9571	-3.32	-8.43744	-1.11129	-6.60259	-0.813719	-0.431697	-1.40315	1.58616	-28.9125	9.1498	9.46644	49.351	69.5142	5.144	19.4103	-1.07967	-0.543114	1	0	0.413145	0.370719	37.0719	0	0
Ghana	2009	1	0	0.498016	-0.0423569	0.0372003	-0.124868	-0.00998761	0.0278358	45.8507	51.9	76.9457	-46.17	35.3059	-10.8116	-4.04662	-3.22	-9.90672	-1.07315	-7.63607	-1.06516	-0.22827	-2.04237	1.0075	-29.9276	4.84449	9.10809	50.031	71.5947	5.348	15.6666	-1.03519	-0.518556	1	0	0.502186	0.398684	39.8684	0	0
Ghana	2010	1	0	0.514765	-0.0332934	0.0535485	-0.102774	0.0142805	0.0260932	42.5096	51.9	68.9564	-50.58	34.9078	-10.1146	-4.13614	-3.3	-8.97063	-1.02545	-5.87184	-1.00998	-0.199727	-2.89906	0.714094	-31.1195	7.89971	7.84948	50.713	75.3778	5.384	16.5956	-0.812697	-0.395703	1	0	0.410581	0.369914	36.9914	0	0
Ghana	2011	1	0	0.484658	-0.00314408	0.0817165	-0.0901555	-0.0291263	0.167112	42.5575	50.1	67.4513	-49.9	34.8529	-16.0707	-4.23556	-3.04	-12.8672	-0.944643	-5.67858	-0.919559	-3.15023	-4.03843	0.815077	-34.0844	14.0471	8.25588	51.394	86.2955	4.227	13.9148	-0.563413	-0.258057	1	0	0.625814	0.437511	43.7512	1	0
Ghana	2012	1	0	0.431352	0.0166695	0.0985033	-0.0900088	-0.126569	0.130695	38.7009	46.5	66.8883	-53.94	34.798	-15.8227	-4.34158	-3.12	-12.2519	-0.912709	-6.55569	-1.15873	-2.30327	-3.39298	0.814261	-36.7686	9.29279	7.98252	52.073	93.168	3.141	15.2053	-0.289346	-0.106728	1	0	0.613831	0.433748	43.3748	1	0
Ghana	2013	1	0	0.438788	0.154123	0.0618108	-0.134415	-0.0967152	0.0606061	40.0881	46.2	63.9938	-52.41	34.7431	-10.8892	-4.4146	-2.93	-8.69818	-0.864456	-4.54814	-0.827287	-1.81718	-2.33286	0.490797	-37.9083	7.31253	5.1348	52.748	60.7593	2.173	54.0129	-0.0825354	0.0074653	1	0	0.379272	0.360081	36.0081	0	0
Ghana	2014	0	0	0.461614	0.0634024	-0.0476707	-0.307953	-0.19533	-0.106808	40.2635	47.7	64.8857	-52.18	34.6881	-12.2495	-4.49158	-2.89	-10.6559	-0.90722	-5.97856	-0.978603	-1.81395	-2.86342	0.423844	-37.1301	2.85624	6.15121	53.419	63.8366	4.415	23.94	0.218372	0.173615	0	0	0.489945	0.39484	39.484	0	0
Ghana	2015	0	0	0.488244	0.123092	-0.107558	-0.319786	-0.210838	-0.0382289	38.286	44	50.8574	-56.72	34.6332	-10.5635	-4.74744	-2.95	-9.88914	-0.914439	-7.0414	-1.14504	-0.73521	-2.11253	1.32399	-37.4187	2.12076	6.45738	54.086	76.5213	6.806	13.253	0.0184858	0.0632454	0	0	0.428504	0.375543	37.5543	0	0
Ghana	2016	1	0	0.583152	0.0332301	-0.299608	-0.254053	-0.175534	-0.138908	37.4002	45.2	47.6269	-57.11	34.8169	-8.6498	-4.78086	-2.87	-8.20811	-0.924132	-6.63978	-1.06946	-0.560457	-1.00787	2.39573	-37.0124	3.37347	6.20783	54.749	67.877	5.232	15.7486	0.274945	0.204853	1	0	0.328037	0.34399	34.399	0	0
Ghana	2017	1	0	0.596183	0.105521	-0.188691	-0.187149	-0.25339	0.082037	43.257	45.3	40.3716	-51.77	35.0006	-10.37	-4.78086	-2.63	-9.22658	-0.87071	-6.21433	-1.10821	-1.59957	-1.41268	1.80269	-41.9649	8.12889	5.39036	55.407	70.5484	3.369	10.6773	0.294672	0.215745	1	0	0.390202	0.363514	36.3514	0	0
Ghana	2018	1	0	0.557818	0.0510871	-0.141936	-0.319947	-0.138364	-0.036643	38.6752	42.1	37.4674	-56.96	35.0323	-9.79041	-4.78086	-2.8	-8.10605	-0.798732	-3.98804	-1.13872	-2.55545	-1.56255	1.76904	-46.3562	6.20008	4.44404	56.06	67.9585	3.253	10.5685	0.294296	0.215538	1	0	0.308569	0.337875	33.7876	0	0
Ghana	2019	1	0	0.55038	0.0127408	-0.185463	-0.289961	-0.108661	0.118527	37.1582	42.6	40.3918	-58.18	35.0652	-9.76737	-4.78086	-2.78	-7.9714	-0.746402	-3.631	-1.24713	-2.69534	-1.64506	1.65601	-51.1838	6.50777	5.6762	56.707	76.8248	3.16	8.48107	0.341703	0.241714	1	0	0.304976	0.336747	33.6747	0	0
Ghana	2020	0	0	0.552889	-0.0821285	-0.13058	-0.196979	-0.127223	0.169902	34.409	40	36.6607	-61.51	35.0974	-8.48658	-4.78086	-2.97	-7.16632	-0.694038	-3.75855	-1.20306	-1.46944	-1.93833	1.70905	-53.5411	0.513942	2.67937	57.349	66.5755	3.313	9.36557	0.226066	0.177863	0	0	0.239555	0.3162	31.62	0	0
Honduras	2002	1	0	-0.162655	-0.879592	-0.536085	-0.685434	-1.01955	-0.252441	41.862	49.8	39.2583	-53	60.2173	-1.37054	-1.77256	-4.93	-1.42346	-0.932159	-1.38379	-1.62346	0	-0.0396773	2.71888	-4.143	3.75434	3.65622	46.61	117.997	4.02	5.13194	3.3347	1.89433	1	0	0.0986424	0.271944	27.1944	0	0
Honduras	2003	1	0	-0.177858	-0.936452	-0.593334	-0.761468	-0.974429	-0.379858	40.9481	47.9	38.3505	-54.21	60.036	-1.21682	-1.77256	-5.12	-1.27356	-0.920458	-1.27356	-1.79833	0	0	2.62894	-5.693	4.54704	4.74056	47.267	122.248	5.3	5.75974	2.96826	1.692	1	0	0.0990924	0.272086	27.2086	0	0
Honduras	2004	1	0	-0.340818	-0.850291	-0.429584	-0.716463	-0.946082	-0.391062	40.0044	46.7	29.3078	-56.16	59.8548	-1.17065	-1.77256	-5.23	-1.22347	-0.907541	-1.2052	-1.98229	0	-0.0182765	2.98348	-6.7914	6.2323	6.67606	47.927	135.462	5.99	6.45198	3.04247	1.73298	1	0	0.0895616	0.269093	26.9092	0	0
Honduras	2005	1	0	-0.345807	-0.771101	-0.625241	-0.680191	-0.819756	-0.623264	43.9976	51.4	32.3324	-52.15	59.6735	-1.19616	-1.77256	-4.89	-1.19537	-0.876144	-1.09996	-1.74371	-8.56667e-05	-0.0953247	2.6752	-5.9331	6.0506	6.16028	48.585	136.49	4.909	7.27916	3.21109	1.82608	1	0	0.0839163	0.267319	26.732	0	0
Honduras	2006	1	0	-0.139433	-0.988683	-0.457659	-0.660407	-0.833332	-0.667904	42.6477	52.2	36.2618	-53.19	59.4923	-1.93887	-1.77256	-5	-1.81008	-0.84937	-1.32259	-1.88208	-0.0022603	-0.485227	2.47474	-7.0419	6.56724	6.57287	49.245	133.132	3.574	5.34866	3.32638	1.88974	1	0	0.128889	0.281444	28.1444	0	0
Honduras	2007	1	0	-0.192797	-0.928943	-0.282702	-0.553879	-0.791543	-0.43703	42.6865	50.6	37.5507	-53.17	59.311	-1.66136	-1.77256	-5.04	-1.53603	-0.814047	-1.19009	-1.83871	-0.00211763	-0.343815	2.38798	-10.9827	6.18833	7.82223	49.905	135.071	3.211	6.62551	3.28334	1.86598	1	0	0.115004	0.277083	27.7083	0	0
Honduras	2008	1	0	-0.294657	-0.971363	-0.316504	-0.622832	-0.915665	-0.527116	41.9791	50	38.4306	-53.84	59.1298	-1.20679	-1.77256	-4.91	-1.19202	-0.800362	-1.1094	-1.71089	-0.00258802	-0.0800319	2.12253	-11.1253	4.2316	8.6502	50.566	135.749	3.156	7.79051	3.14367	1.78885	1	0	0.0891997	0.268979	26.8979	0	0
Honduras	2009	0	1	-0.532957	-0.895502	-0.310121	-0.674578	-0.908243	-0.308192	43.6565	50.5	43.3016	-51.25	58.9485	-1.16441	-1.77256	-4.97	-1.10274	-0.84462	-0.926558	-1.5587	-0.00121096	-0.174968	2.18832	-11.0093	-2.43163	3.38987	51.225	96.905	3.292	7.65373	3.11012	1.77033	0	1	0.085864	0.267931	26.7931	0	0
Honduras	2010	1	0	-0.50361	-0.875314	-0.246572	-0.636895	-0.88917	-0.49691	44.7491	53.6	46.3371	-49.57	58.7673	-2.36463	-1.77256	-4.86	-2.30432	-0.848575	-1.92536	-1.54707	-0.00164561	-0.377321	2.10111	-11.0558	3.73114	3.83461	51.885	109.442	4.119	4.67604	3.06978	1.74806	1	0	0.162839	0.292107	29.2107	0	0
Honduras	2011	1	0	-0.468656	-0.905361	-0.152864	-0.520891	-0.833936	-0.390435	41.871	50.9	44.6537	-53.21	58.5677	-1.70448	-1.77256	-5.17	-0.23246	-0.848248	0	-1.56713	-0.00256811	-0.229892	1.84465	-12.3981	3.83569	5.88681	52.543	122.217	4.474	7.80721	3.0756	1.75127	1	0	0.0567288	0.258781	25.8781	0	0
Honduras	2012	1	0	-0.469778	-1.14643	-0.205009	-0.691542	-0.955132	-0.350116	41.4504	49.3	45.2443	-53.38	58.3682	-1.63061	-1.77256	-5.1	-0.277274	-0.816449	0	-1.66456	-0.00240504	-0.274869	1.91782	-13.082	4.12869	5.83611	53.202	121.188	3.755	3.57979	3.12577	1.77897	1	0	0.0553713	0.258354	25.8354	0	0
Honduras	2013	0	0	-0.474992	-1.17303	-0.197601	-0.724006	-0.945059	-0.438612	41.392	51.1	42.5874	-53.62	58.1686	-1.78209	-1.77256	-4.99	-0.0637458	-0.833509	0	-1.76139	-0.0021974	-0.0615484	2.04881	-12.6523	2.79156	5.77862	53.858	116.306	5.646	1.37403	3.17409	1.80565	0	0	0.0492366	0.256428	25.6428	0	0
Honduras	2014	0	0	-0.40925	-0.943307	-0.408311	-0.812356	-0.787561	-0.534084	41.4696	52.2	40.6083	-53.28	57.9691	-2.26613	-1.77256	-4.94	-0.220948	-0.808463	0	-1.75315	-0.00189585	-0.219052	2.16588	-13.1429	3.05808	8.629	54.514	112.975	7.078	6.84936	3.43141	1.94773	0	0	0.0561061	0.258585	25.8585	0	0
Honduras	2015	1	0	-0.421847	-0.942612	-0.41771	-0.859405	-0.589746	-0.472758	41.0295	50.8	45.9164	-53.87	57.7695	-1.56846	-1.77256	-5.18	-0.0964561	-0.779597	0	-1.76626	0	-0.0964561	2.25895	-13.9664	3.84008	6.27594	55.165	107.264	6.147	6.93277	3.27124	1.8593	1	0	0.0538953	0.257891	25.7891	0	0
Honduras	2016	1	0	-0.43827	-1.13693	-0.530846	-0.763441	-0.679403	-0.437456	44.8713	52.7	52.114	-49.14	57.5838	-2.01566	-1.77256	-5.01	-0.133255	-0.699588	0	-1.68379	0	-0.133255	2.35249	-13.9864	3.89297	5.28157	55.813	99.8157	6.727	3.67807	3.20858	1.82469	1	0	0.0685177	0.262483	26.2483	0	0
Honduras	2017	1	0	-0.440319	-1.06041	-0.451085	-0.530908	-0.738785	-0.565637	37.3168	45.6	61.2312	-52.9	57.3966	-1.72907	-1.77256	-4.1	-0.11179	-0.676876	0	-1.59514	-0.000665239	-0.111124	2.36515	-12.8173	4.84291	4.10592	56.457	101.813	5.528	4.51284	3.16496	1.80061	1	0	0.016634	0.246188	24.6188	0	0
Honduras	2018	1	0	-0.523528	-1.05719	-0.448793	-0.618258	-0.656895	-0.531821	36.5729	48.9	66.7643	-50.24	57.2094	-1.07184	-1.77256	-4.21	-0.00118316	-0.632226	0	-1.77577	-0.00102535	-0.000157813	2.28602	-12.6892	3.84499	5.99386	57.096	103.551	5.648	1.94722	3.17116	1.80404	1	0	0.0276121	0.249636	24.9636	0	0
Honduras	2019	0	0	-0.572003	-1.0415	-0.495705	-0.619123	-0.875854	-0.569057	36.1474	46.2	57.2044	-52.55	57.0222	-0.916855	-1.77256	-4.35	-0.00122462	-0.616965	0	-1.80398	-0.000734773	-0.000489843	2.32019	-14.0561	2.55963	3.83846	57.73	99.46	5.698	3.35874	3.06704	1.74654	0	0	0.0152887	0.245766	24.5766	0	0
Honduras	2020	0	1	-0.618947	-1.01033	-0.49494	-0.645809	-0.988051	-0.448508	36.5041	50.2	57.4846	-51.21	56.8349	-1.23326	-1.77256	-4.41	-0.000991001	-0.676028	0	-1.74109	-0.000388511	-0.00060249	2.08362	-12.8956	-8.96508	1.01068	58.359	88.0009	10.982	3.40198	2.92313	1.66708	0	1	0.0268189	0.249387	24.9387	0	0
Hungary	2002	1	0	1.15602	0.868622	1.25909	0.991949	0.574015	1.26067	3.11126	5.2	0.655475	-80.8	21.7163	-0.454219	-96	-4.9	-0.296013	-0.246331	0	-1.75723	-0.296013	0	2.60441	-75.2731	4.73007	5.38678	65.081	118.269	5.608	8.04647	-1.26328	-0.644499	1	0	-0.342686	0.133338	13.3338	0	0
Hungary	2003	1	0	1.16738	0.80535	1.11896	0.827254	0.635689	1.13186	3.14483	5	0.984039	-83.14	21.856	-0.418114	-95.0889	-4.81	-0.271466	-0.251025	0	-1.51871	-0.271466	0	2.64562	-75.5871	3.93878	4.88025	65.489	116.787	5.79	5.41082	-1.04635	-0.524718	1	0	-0.358148	0.128482	12.8482	0	0
Hungary	2004	1	0	1.14941	0.846135	1.16811	0.801827	0.665136	0.828298	3.34041	4.6	2.7745	-81.82	21.9957	-0.449426	-94.1778	-4.57	-0.258845	-0.245097	0	-1.27171	-0.258776	-6.87034e-05	2.91655	-75.5661	4.96313	4.36291	65.896	123.616	5.832	5.14275	-1.23428	-0.628484	1	0	-0.374923	0.123213	12.3213	0	0
Hungary	2005	1	0	1.17519	0.838809	1.04747	0.748193	0.625532	1.0031	5.86519	7.3	5.23059	-78.94	22.1379	-0.409312	-93.2667	-4.71	-0.25117	-0.252884	0	-1.22612	-0.251053	-0.00011741	2.80271	-73.6294	4.30028	24.306	66.365	128.005	7.189	2.6227	-1.02353	-0.512116	1	0	-0.359197	0.128152	12.8152	0	0
Hungary	2006	1	0	1.01504	0.976617	1.20099	0.839412	0.633172	0.985676	6.0116	7.9	4.16384	-78.71	22.2777	-0.543296	-92.3556	-4.49	-0.35122	-0.24115	0	-1.25287	-0.350931	-0.000288531	2.94925	-74.727	3.93393	16.1575	66.895	149.232	7.494	3.6723	-0.620093	-0.289354	1	0	-0.359592	0.128028	12.8028	0	0
Hungary	2007	0	0	1.04106	0.941449	1.20607	0.691067	0.595291	0.747097	6.75729	9	4.71294	-77.48	22.4174	-0.466808	-91.4444	-4.39	-0.331826	-0.249277	0	-1.07041	-0.331376	-0.000450013	2.9034	-71.7142	0.332354	50.4065	67.421	155.601	7.406	5.43985	-0.575188	-0.264559	0	0	-0.366989	0.125705	12.5705	0	0
Hungary	2008	0	0	0.965708	0.913387	1.1741	0.695978	0.434097	0.750264	7.16556	9	5.88715	-76.66	22.5571	-0.659686	-90.5333	-4.29	-0.456892	-0.230164	0	-0.961853	-0.45672	-0.000171787	2.9946	-67.5742	0.993437	47.2364	67.943	158.453	7.817	4.79998	-0.732261	-0.351289	0	0	-0.363622	0.126763	12.6762	0	0
Hungary	2009	0	1	0.909724	0.771156	1.08186	0.668048	0.39533	0.536816	9.65776	12.3	8.06191	-72.12	22.4662	-0.474511	-105.7	-4.36	-0.340511	-0.238011	0	-1.05391	-0.340438	-7.24365e-05	2.89692	-62.563	-6.74017	-2.2828	68.46	145.306	10.03	4.21367	-0.610409	-0.284006	0	1	-0.368515	0.125226	12.5226	0	0
Hungary	2010	0	0	0.894237	0.772669	1.01445	0.644823	0.303954	0.685784	10.1804	13.5	8.08119	-71.97	22.6046	-0.502154	-89.5	-4.48	-0.320734	-0.220587	0	-1.08637	-0.320677	-5.72906e-05	2.96868	-62.8168	1.06795	-15.8854	68.911	157.839	11.172	2.53121	-0.571393	-0.262464	0	0	-0.343355	0.133128	13.3128	0	0
Hungary	2011	0	0	0.836973	0.756603	1.02755	0.650212	0.33265	0.743254	10.8073	14.7	7.5187	-70.47	22.6364	-0.675554	-87.0833	-4.3	-0.451945	-0.210826	0	-1.03595	-0.451885	-6.03284e-05	2.8511	-62.7186	1.91671	7.45442	69.358	166.754	11.029	1.92746	-0.509666	-0.22838	0	0	-0.336825	0.135179	13.5179	0	0
Hungary	2012	0	1	0.749368	0.611103	0.982062	0.608618	0.298703	0.675795	11.5003	16.5	7.63921	-68.2	22.6683	-0.61842	-84.1833	-4.15	-0.439399	-0.203496	0	-1.09384	-0.439335	-6.43814e-05	2.96681	-58.3396	-1.33948	8.3055	69.678	166.176	11.003	2.87712	-0.572301	-0.262965	0	1	-0.334062	0.136047	13.6046	0	0
Hungary	2013	0	0	0.737165	0.58302	0.899946	0.678418	0.293922	0.796646	12.5179	17.2	9.2007	-65.44	22.7002	-0.507806	-87.5	-3.94	-0.351948	-0.185473	0	-1.00016	-0.351919	-2.89287e-05	2.81141	-56.4338	2.03217	-2.74986	69.953	164.476	10.177	2.83481	-0.562875	-0.25776	0	0	-0.346572	0.132117	13.2118	0	0
Hungary	2014	1	0	0.553214	0.509203	0.747946	0.582896	0.156545	0.669905	11.6403	15.7	10.7167	-65.35	22.5502	-0.403352	-65.3833	-3.77	-0.270954	-0.180227	0	-1.01586	-0.270951	-3.3814e-06	2.7551	-55.4843	4.33435	9.1265	70.227	168.358	7.725	3.69012	-0.838314	-0.409847	1	0	-0.333619	0.136185	13.6185	0	0
Hungary	2015	1	0	0.560091	0.382024	0.750261	0.509737	0.118709	0.737792	11.685	15.6	10.6358	-66.2	22.5819	-0.285147	-67.1667	-3.85	-0.168194	-0.181384	0	-1.26566	-0.168192	-1.70811e-06	2.74037	-57.6611	3.65982	-4.36726	70.5	167.291	6.813	2.81116	-0.811667	-0.395134	1	0	-0.329516	0.137474	13.7474	0	0
Hungary	2016	0	0	0.402424	0.413626	0.590769	0.457127	0.0721641	0.643381	11.4883	15.3	10.2126	-66.61	22.559	-0.22703	-65.9833	-3.81	-0.118517	-0.170919	0	-1.26984	-0.118513	-4.00979e-06	2.80789	-59.473	2.43864	53.8468	70.779	163.972	5.115	1.32255	-0.902781	-0.445443	0	0	-0.334356	0.135954	13.5954	0	0
Hungary	2017	1	0	0.53744	0.537432	0.637029	0.48128	0.0906213	0.796201	10.7816	14.6	10.5727	-68.02	22.543	-0.282559	-78.942	-3.81	-0.154646	-0.165412	0	-1.26538	-0.154637	-8.54855e-06	2.70231	-61.791	4.12418	-8.63135	71.062	165.033	4.156	4.03729	-0.717462	-0.343117	1	0	-0.347903	0.131699	13.1699	0	0
Hungary	2018	1	0	0.487893	0.55507	0.563642	0.443153	0.0553392	0.737591	10.1669	13.6	11.7442	-68.38	22.5282	-0.347623	-81.9744	-3.61	-0.228382	-0.163235	0	-1.17834	-0.228379	-3.15266e-06	2.56476	-62.3531	5.60614	-40.1082	71.351	162.701	3.708	4.84538	-0.799076	-0.388182	1	0	-0.357484	0.12869	12.869	0	0
Hungary	2019	1	0	0.343574	0.498684	0.592322	0.450479	0.0306372	0.761921	9.94682	13.6	13.6771	-68.28	22.5123	-0.303895	-74.3846	-3.46	-0.201281	-0.164943	0	-1.18458	-0.201281	0	2.527	-61.7838	5.07718	59.5775	71.644	159.926	3.419	4.75294	-0.749166	-0.360623	1	0	-0.353984	0.12979	12.979	0	0
Hungary	2020	0	1	0.390373	0.492386	0.469367	0.538536	0.0689541	0.837047	10.3084	14.8	15.8288	-67.86	22.4963	-0.204655	-77.8767	-3.56	-0.113014	-0.171088	0	-1.18493	-0.113014	0	2.41626	-58.6894	-4.33873	105.636	71.942	154.295	4.25	6.42661	-0.707276	-0.337493	0	1	-0.354293	0.129692	12.9692	0	0
India	2002	1	0	0.426246	-0.0173959	-0.3814	-0.189068	-0.555382	-1.21066	29.4377	45.8	12.8006	-67.95	22.8616	-2.34136	-44.296	-6.71	-1.3336	-2.10832	-0.374179	-3.88268	-0.867368	-0.0920525	1.38015	-1687.38	3.80398	1.01157	28.244	29.5087	7.753	3.71568	-2.35931	-1.24968	1	0	0.0878607	0.268558	26.8558	0	0
India	2003	1	0	0.454565	0.120162	-0.38163	-0.143909	-0.456321	-1.51	29.1217	45.6	11.5192	-68.17	22.9257	-2.22672	-45.3374	-6.37	-1.25187	-1.9528	-0.341818	-3.52461	-0.819593	-0.0904561	1.38015	-1744.23	7.86038	0.605888	28.572	30.5924	7.68	3.8678	-2.49001	-1.32185	1	0	0.0570484	0.258881	25.8881	0	0
India	2004	1	0	0.399967	0.0533561	-0.37813	-0.179699	-0.448476	-1.28043	28.1487	44.9	12.8709	-69.13	22.9898	-3.16932	-43.2393	-6.24	-1.48641	-1.79777	-0.244517	-3.40153	-1.10716	-0.134741	1.38015	-1852.95	7.92294	0.765597	28.903	37.5038	7.625	5.72541	-2.41628	-1.28114	1	0	0.0770322	0.265157	26.5157	0	0
India	2005	1	0	0.413686	0.13313	-0.29189	-0.0987746	-0.363161	-1.01388	27.6335	44.2	14.3659	-69.4	23.0539	-3.65874	-43.4958	-5.94	-1.82951	-1.70324	-0.213464	-3.2464	-1.19301	-0.423039	1.38015	-1930.85	7.92343	0.886098	29.235	42.0017	7.552	5.6219	-2.50972	-1.33274	1	0	0.0801927	0.26615	26.615	0	0
India	2006	1	0	0.437194	0.17899	-0.283315	-0.0953765	-0.274563	-1.06518	26.8325	43.2	15.9725	-69.99	23.1179	-3.93369	-43.7524	-5.74	-2.0774	-1.60723	-0.284269	-3.19445	-1.22182	-0.571304	1.26908	-2041.57	8.06073	2.13017	29.569	45.7245	7.552	8.40094	-2.4476	-1.29844	1	0	0.0886869	0.268818	26.8818	0	0
India	2007	1	0	0.453964	0.0968982	-0.313716	0.136992	-0.39769	-1.1543	25.9314	41.5	16.8958	-70.96	23.182	-4.44228	-44.009	-5.54	-2.38551	-1.543	-0.303027	-2.84122	-1.07292	-1.00957	1.13583	-2191.3	7.66082	2.07339	29.906	45.6863	7.561	6.94442	-2.19434	-1.1586	1	0	0.0845358	0.267514	26.7514	0	0
India	2008	0	0	0.462193	0.0958505	-0.413643	-0.00973291	-0.339098	-1.10971	24.8159	39.4	17.1073	-72.44	23.2461	-7.10935	-44.2656	-5.63	-3.28513	-1.56112	-0.301103	-3.20768	-1.66143	-1.3226	1.122	-2277.94	3.0867	3.62052	30.246	53.3682	7.656	9.19397	-2.39702	-1.27051	0	0	0.172189	0.295043	29.5043	0	0
India	2009	1	0	0.460749	0.0179808	-0.349533	-0.00329579	-0.452406	-1.35555	23.4441	37.4	15.3505	-73.85	23.3101	-3.36239	-44.5221	-5.67	-1.58784	-1.50141	-0.26076	-3.24003	-0.775418	-0.551658	1.09518	-2400.91	7.86189	2.65159	30.587	46.2729	7.664	7.04037	-2.39403	-1.26885	1	0	0.0606635	0.260016	26.0017	0	0
India	2010	1	0	0.443313	-0.0358108	-0.410472	0.031656	-0.463755	-1.27798	22.7746	36.2	14.9419	-74.19	23.3742	-4.49752	-44.7787	-5.41	-2.24149	-1.45934	-0.380636	-2.86182	-0.986014	-0.874836	1.03318	-2495.09	8.49758	1.63503	30.93	49.2552	7.652	10.526	-2.39577	-1.26982	1	0	0.0771705	0.265201	26.5201	0	0
India	2011	1	0	0.435819	-0.0862971	-0.363155	0.0225541	-0.540836	-1.3268	22.1138	35	15.3061	-74.49	23.4638	-5.30508	-44.7787	-5.28	-2.55209	-1.46624	-0.354732	-2.89984	-1.45102	-0.746334	1.18656	-2663.57	5.24132	2.00206	31.276	55.6239	7.616	8.73358	-2.22645	-1.17632	1	0	0.104518	0.27379	27.379	0	0
India	2012	1	0	0.399454	-0.0628807	-0.480886	-0.156087	-0.513968	-1.28931	21.364	34.8	16.245	-75.52	23.5534	-4.02384	-44.7787	-5.28	-1.94319	-1.47417	-0.31321	-3.28464	-1.31025	-0.319725	1.01509	-2691.99	5.45639	1.31293	31.634	55.7937	7.666	7.93439	-2.47147	-1.31162	1	0	0.0847837	0.267592	26.7592	0	0
India	2013	1	0	0.432717	-0.0458926	-0.478095	-0.157355	-0.517281	-1.22917	21.5104	34.9	15.2988	-75.14	23.643	-3.67309	-44.7787	-5.11	-1.81238	-1.43073	-0.283202	-3.47729	-1.13324	-0.39594	1.00094	-2731.35	6.38611	1.51628	32.003	53.8441	7.711	6.1865	-2.53035	-1.34412	1	0	0.0760988	0.264864	26.4864	0	0
India	2014	1	0	0.413222	-0.0691894	-0.475076	-0.222847	-0.457606	-0.997912	20.6476	33.9	15.8632	-76.19	23.7326	-2.81369	-44.7787	-5.08	-1.40858	-1.34418	-0.268203	-3.58781	-0.897408	-0.242966	0.955136	-2969.18	7.41023	1.69566	32.384	48.9222	7.674	3.33176	-2.51698	-1.33674	1	0	0.0607605	0.260047	26.0047	0	0
India	2015	1	0	0.427863	-0.0707211	-0.424957	0.0800815	-0.406574	-0.954774	20.5115	33.4	14.8949	-76.42	23.8222	-1.77764	-44.7787	-4.82	-0.892185	-1.28756	-0.298467	-3.60913	-0.44669	-0.147027	1.07215	-3006.39	7.99625	2.09212	32.777	41.9229	7.631	2.27959	-2.44011	-1.2943	1	0	0.0163796	0.246109	24.6108	0	0
India	2016	1	0	0.441011	-0.0561539	-0.311532	0.0613894	-0.337336	-0.960427	20.9058	33	13.5972	-75.81	23.9118	-1.74839	-44.7787	-4.54	-0.849895	-1.21477	-0.304149	-3.50698	-0.351538	-0.194208	1.38845	-3047.83	8.25631	1.93736	33.182	40.0825	7.601	3.23797	-2.56947	-1.36573	1	0	-0.0018784	0.240374	24.0374	0	0
India	2017	1	0	0.386968	-0.0297501	-0.256661	0.0410966	-0.2919	-0.774099	20.9563	32.5	14.1594	-75.78	24.0014	-1.98393	-44.7787	-4.46	-0.867986	-1.15329	-0.209055	-3.31032	-0.445013	-0.213918	1.27698	-3186.62	6.79538	1.50732	33.6	40.7425	7.618	3.96926	-2.47052	-1.31109	1	0	-0.0019559	0.24035	24.035	0	0
India	2018	1	0	0.360422	-0.00142209	-0.225997	0.262918	-0.229759	-0.997707	20.7275	32.9	15.0103	-75.95	24.091	-2.25532	-44.7787	-4.41	-1.02273	-1.13379	-0.150446	-3.59251	-0.585321	-0.286959	1.29818	-3224.87	6.45385	1.55821	34.03	43.617	7.652	3.88424	-2.49655	-1.32546	1	0	0.0190543	0.246948	24.6948	0	0
India	2019	1	0	0.268078	-0.0672272	-0.150565	0.130772	-0.302602	-0.796847	20.5736	33.5	16.8275	-75.36	24.1806	-2.01225	-44.7787	-4.25	-0.853397	-1.13916	-0.157403	-3.57183	-0.410881	-0.285114	1.29818	-3156.94	3.87144	1.78483	34.472	39.9054	6.51	2.40552	-2.64155	-1.40552	1	0	0.0023164	0.241692	24.1692	0	0
India	2020	0	1	0.127333	-0.0584247	-0.128489	0.374532	-0.293598	-0.841419	22.246	36.1	19.7552	-73.34	24.2702	-1.78467	-44.7787	-4.25	-0.901818	-1.25544	-0.188802	-3.60068	-0.266049	-0.446966	1.29818	-2948.15	-5.77772	2.4062	34.926	37.7581	7.859	4.81486	-2.65553	-1.41325	0	1	-7.79e-05	0.24094	24.094	0	0
Ireland	2002	1	0	1.27082	1.59533	1.7195	1.57149	1.36863	1.50422	1.03409	2.2	6.88232	-97.89	9.41158	-0.0475809	-1.84045	-2.92	-0.0182961	-0.0635334	0	-0.821137	-0.0182961	0	2.27297	-83.2345	5.89937	22.803	59.649	163.719	4.216	5.1869	1.97222	1.14202	1	0	-0.416071	0.11029	11.029	0	0
Ireland	2003	0	0	1.27647	1.48247	1.58466	1.49655	1.41382	1.34846	1.02739	2	5.93204	-97.61	9.54226	-0.0356363	-1.7705	-2.77	-0.0110599	-0.055921	0	-0.652592	-0.0110599	0	2.26701	-83.2492	3.01384	13.8344	59.925	146.532	4.478	3.91173	1.77575	1.03354	0	0	-0.428998	0.10623	10.623	0	0
Ireland	2004	1	0	1.47755	1.51068	1.56711	1.51925	1.27041	1.17083	1.18097	2.3	6.8364	-97.12	9.67293	-0.0549132	-1.70056	-2.67	-0.0393713	-0.0511066	0	-0.587676	-0.0115838	-0.0277875	2.45336	-80.855	6.78814	-5.45737	60.202	146.588	4.491	0.515338	1.68166	0.981588	1	0	-0.433602	0.104784	10.4784	0	0
Ireland	2005	1	0	1.62385	1.58428	1.48796	1.73056	1.58445	1.29867	1.4766	2.9	8.53808	-96.29	9.8036	-0.0636046	-1.63061	-2.55	-0.0529073	-0.0473704	-0.00243014	-0.591499	-0.00555339	-0.0449237	2.47754	-82.8398	5.73978	22.1833	60.477	148.176	4.237	3.07321	1.6641	0.971893	1	0	-0.433447	0.104833	10.4833	0	0
Ireland	2006	1	0	1.39654	1.7089	1.83705	1.53167	1.70114	1.19241	1.50461	3.2	10.3299	-96.07	9.93427	-0.309124	-1.5602	-2.44	-0.30973	-0.0446514	0	-0.569225	-0.0125701	-0.297159	2.41669	-83.4014	4.98785	9.50556	60.738	150.022	4.355	3.4199	1.76695	1.02868	1	0	-0.424971	0.107495	10.7495	0	0
Ireland	2007	1	0	1.39714	1.72822	1.85082	1.55425	1.73924	1.21519	1.67323	3.5	10.9781	-96.05	10.0649	-0.285067	-1.4898	-2.36	-0.285018	-0.044595	0	-0.511323	-0.00743515	-0.277582	2.44717	-80.0026	5.31012	22.1915	60.94	153.397	4.98	1.19849	1.58082	0.925906	1	0	-0.429923	0.10594	10.594	0	0
Ireland	2008	0	1	1.42259	1.70413	1.91426	1.49149	1.73599	1.18687	1.8914	4.2	12.9818	-95.87	10.1956	-0.0396359	-1.51735	-2.45	-0.022228	-0.0474894	0	-0.515293	-0.0159197	-0.00630835	2.30354	-78.335	-4.48407	8.45449	61.141	160.039	6.774	-0.504527	1.45523	0.85656	0	1	-0.431301	0.105507	10.5507	0	0
Ireland	2009	0	1	1.35357	1.7431	1.69593	1.33219	1.7503	1.05737	2.3536	5.3	15.7929	-94.85	10.3263	-0.0448353	-1.5449	-2.5	-0.027764	-0.0504134	0	-0.567103	-0.00794793	-0.0198161	2.26372	-72.3487	-5.09578	22.8276	61.342	173.591	12.609	-4.6246	1.20084	0.716098	0	1	-0.421245	0.108665	10.8665	0	0
Ireland	2010	0	0	1.32443	1.76081	1.61843	1.3443	1.68116	1.02017	2.57718	5.3	13.7751	-95.04	10.457	-0.108588	-1.69683	-2.46	-0.091515	-0.0456537	0	-0.615737	-0.0143827	-0.0771323	2.4436	-72.373	1.68297	17.0049	61.542	189.864	14.534	-2.8583	1.1763	0.702545	0	0	-0.421557	0.108567	10.8567	0	0
Ireland	2011	0	0	1.30536	1.74647	1.5948	1.45015	1.55608	0.948999	2.78644	7	19.9661	-93.5	10.5565	-0.0962428	-1.84875	-2.22	-0.0815043	-0.0461296	0	-0.562361	-0.0123528	-0.0691515	2.42784	-67.6669	1.64877	9.82001	61.742	186.026	15.354	1.86454	1.18861	0.709345	0	0	-0.422702	0.108207	10.8207	0	0
Ireland	2012	0	1	1.32252	1.7272	1.56389	1.53907	1.4557	0.941073	3.23349	6.9	19.9892	-93.27	10.6561	-0.0585572	-2.00068	-2.22	-0.0400245	-0.0439713	0	-0.632184	-0.0128528	-0.0271717	2.35679	-68.2881	-0.39896	25.56	61.942	190.063	15.451	2.43515	0.999652	0.605009	0	1	-0.419968	0.109066	10.9066	0	0
Ireland	2013	0	0	1.31169	1.70915	1.57406	1.50404	1.64604	0.901076	3.6774	7.7	23.0414	-91.34	10.7556	-0.0370891	-2.15261	-2.19	-0.0142183	-0.0392239	0	-0.572934	-0.00957383	-0.00464445	2.42892	-68.1173	2.19218	29.815	62.141	189.818	13.735	1.33941	1.02207	0.617386	0	0	-0.418491	0.10953	10.953	0	0
Ireland	2014	1	0	1.31749	1.76059	1.75873	1.59883	1.69225	1.05299	4.20093	8.8	25.5734	-90.29	10.8552	-0.0353959	-2.30454	-1.97	-0.0153392	-0.0325466	0	-0.545709	-0.00618932	-0.00914992	2.33419	-67.7579	9.33603	39.3212	62.34	201.655	11.858	0.260926	0.676786	0.426734	1	0	-0.421065	0.108722	10.8722	0	0
Ireland	2015	1	0	1.33476	1.72836	1.80812	1.52084	1.67364	0.895333	4.01059	9.5	28.7078	-90.68	10.9547	-0.0187707	-2.45646	-1.65	-0.00325447	-0.026925	0	-0.573745	-0.00267427	-0.000580198	1.85767	-70.2524	24.6156	74.7452	62.538	216.206	9.908	8.90845	0.603944	0.386514	1	0	-0.423899	0.107832	10.7832	0	0
Ireland	2016	0	0	1.29118	1.46621	1.72935	1.32956	1.64945	0.83385	4.08436	8.6	25.5821	-92.06	11.0662	-0.0652249	-2.60839	-1.7	-0.058951	-0.0217968	0	-0.571551	-0.0472463	-0.0117047	1.85325	-72.3155	1.22264	26.0996	62.737	229.764	8.374	0.119374	0.385062	0.265655	0	0	-0.424428	0.107665	10.7665	0	0
Ireland	2017	1	0	1.29467	1.38122	1.57531	1.26729	1.5296	0.99341	5.085	10.1	29.4297	-90.16	11.1775	-0.112833	-2.76032	-1.51	-0.117166	-0.0194385	0	-0.528448	-0.0689102	-0.0482556	1.63054	-73.4403	10.0496	20.4067	62.947	225.954	6.713	1.49994	0.608022	0.388765	1	0	-0.419622	0.109175	10.9175	0	0
Ireland	2018	1	0	1.29577	1.41251	1.61936	1.37824	1.53494	1.01137	5.54333	10.8	33.5381	-88.55	11.2356	-0.126076	-2.91224	-1.41	-0.132249	-0.018888	0	-0.493243	-0.0954752	-0.0367741	1.53109	-68.6895	7.54434	20.3766	63.17	216.424	5.741	0.924337	0.500529	0.329412	1	0	-0.415747	0.110392	11.0392	0	0
Ireland	2019	1	0	1.30324	1.34828	1.59088	1.25756	1.45881	0.959416	5.73902	12.3	38.9135	-86.87	11.2937	-0.0671704	-3.13878	-1.33	-0.0639857	-0.0188819	0	-0.470022	-0.0498776	-0.0141081	1.38118	-67.0878	5.04055	7.67632	63.405	249.746	4.95	3.3917	0.427874	0.289294	1	0	-0.412584	0.111385	11.1385	0	0
Ireland	2020	1	0	1.38936	1.4563	1.46745	1.43524	1.53513	0.965522	5.98726	13.7	42.6417	-85.91	11.3517	-0.0367627	-3.15102	-1.21	-0.0307647	-0.0197243	0	-0.46421	-0.01832	-0.0124446	1.17866	-65.2646	7.1579	8.08333	63.653	250.108	5.623	-1.92434	0.4731	0.314266	1	0	-0.410391	0.112074	11.2074	0	0
Israel	2002	0	1	0.589134	1.06982	0.91935	1.03079	1.19632	-1.46214	0.0372107	6.5	0.0703297	-97.09	7.07948	-0.00121323	-205.8	-4.09	-0.000361083	-0.139107	-0.000205091	-1.0203	-0.000155992	0	2.07798	-72.1433	-0.134073	1.26264	91.33	65.4711	12.888	4.72344	-1.62129	-0.842175	0	1	-0.6018	0.051959	5.1959	0	1
Israel	2003	0	0	0.644293	0.910985	0.905545	1.13987	1.08442	-1.51878	0.0457588	6.5	0.0914096	-97.08	7.0841	-0.000949387	-229.333	-4.23	-0.00020267	-0.133182	-0.000137911	-1.04361	-6.47592e-05	0	2.09458	-73.9378	1.44906	2.52799	91.393	66.8818	13.505	-0.656483	-1.61281	-0.837494	0	0	-0.621725	0.0457011	4.57011	0	1
Israel	2004	1	0	0.66225	0.848271	0.817563	1.242	0.911944	-1.32268	0.0561773	6.7	0.0824891	-96.81	7.08872	-0.0355018	-189.2	-3.93	-0.0189009	-0.124764	-8.54805e-05	-1.02448	-0.0188154	0	2.42427	-73.8579	4.6479	2.10421	91.456	74.9732	13.029	0.228404	-1.58082	-0.819831	1	0	-0.590244	0.0555881	5.55881	0	0
Israel	2005	1	0	0.646124	0.807716	0.861688	1.03846	0.823018	-1.24752	0.0646062	7	0.0837414	-96.77	7.09335	-0.059626	-187.444	-3.62	-0.037492	-0.117971	-5.62271e-05	-0.973258	-0.0374358	0	2.46924	-71.4231	4.38779	3.26627	91.518	78.3243	11.342	1.03598	-1.31056	-0.670606	1	0	-0.600444	0.0523848	5.23847	0	1
Israel	2006	1	0	0.774156	0.891168	0.997166	1.24784	1.00025	-1.25929	0.0610742	6.9	0.0538194	-97.09	7.09797	-0.105793	-185.689	-3.78	-0.070187	-0.111745	-9.05994e-06	-0.998144	-0.0637285	-0.00644941	2.49538	-74.6602	5.60163	9.05944	91.58	78.4353	10.707	1.27587	-1.25871	-0.641972	1	0	-0.59025	0.0555864	5.55864	0	0
Israel	2007	1	0	0.740544	0.816403	1.10059	1.23067	0.843344	-1.25203	0.0796243	6.7	0.0503049	-97.18	7.10259	-0.128587	-183.933	-3.65	-0.0851635	-0.107184	0	-0.933102	-0.0714981	-0.0136653	2.71679	-77.2981	6.32335	4.76394	91.641	78.8371	9.379	0.782237	-1.28691	-0.657546	1	0	-0.596977	0.0534736	5.34736	0	1
Israel	2008	0	0	0.723265	0.837563	1.17126	1.32564	0.884931	-1.3231	0.0999983	8.9	0.0650866	-96.62	7.10721	-0.386322	-182.178	-3.89	-0.20044	-0.109221	0	-0.827641	-0.085349	-0.115091	2.69836	-78.5089	3.2221	4.64409	91.702	75.3809	7.704	1.35923	-1.35621	-0.695809	0	0	-0.580508	0.058646	5.8646	0	0
Israel	2009	0	0	0.570473	0.835134	1.09901	1.27144	0.80326	-1.62521	0.146282	8.5	0.155705	-96.51	7.11183	-0.309661	-180.422	-3.63	-0.133051	-0.109123	0	-0.876877	-0.0504162	-0.0826349	2.58482	-76.9394	1.23773	2.15878	91.763	61.6756	9.534	4.42522	-1.50901	-0.780179	0	0	-0.588599	0.0561047	5.61047	0	0
Israel	2010	1	0	0.583845	0.909712	1.21483	1.38623	0.750027	-1.34115	0.141745	8.6	0.330819	-96.45	7.11645	-0.173972	-178.667	-3.7	-0.0706745	-0.106045	0	-0.861171	-0.0347038	-0.0359707	2.84203	-82.6413	5.53434	2.91419	91.826	65.6331	8.48	1.19086	-1.52699	-0.790106	1	0	-0.590308	0.055568	5.5568	0	0
Israel	2011	1	0	0.65331	1.00532	1.31119	1.3368	0.797708	-1.20132	0.154638	9.1	0.676112	-96.58	7.21811	-0.28063	-173.493	-3.5	-0.126104	-0.10418	0	-0.791064	-0.0663665	-0.059738	2.76919	-82.6555	5.5188	3.22759	91.892	68.9094	7.139	1.44539	-1.58656	-0.823001	1	0	-0.58931	0.0558816	5.58816	0	0
Israel	2012	0	0	0.644345	0.928756	1.17113	1.26981	0.902115	-1.0789	0.154192	2.9	0.81826	-100	7.31978	-0.270059	-168.32	-3.45	-0.130051	-0.105886	0	-0.924356	-0.0263944	-0.103657	2.61456	-89.5479	2.44717	3.42097	91.96	69.965	6.762	3.42156	-1.70435	-0.888039	0	0	-0.589122	0.0559405	5.59404	0	0
Israel	2013	1	0	0.649327	0.971388	1.15938	1.24306	0.905974	-1.10128	0.121542	3.3	0.928834	-99.94	7.42144	-0.262662	-163.067	-3.03	-0.150499	-0.102391	0	-0.742259	-0.0987936	-0.051705	2.43427	-80.9964	4.08571	3.96753	92.031	64.1341	6.137	1.87414	-1.6567	-0.861728	1	0	-0.601704	0.051989	5.1989	0	1
Israel	2014	1	0	0.727532	1.10519	1.21122	1.20618	0.860555	-1.03974	0.171578	3.7	1.58585	-99.66	7.52311	-0.240637	-157.867	-2.82	-0.144511	-0.0958367	0	-0.697443	-0.111808	-0.0327033	2.54642	-78.5584	3.77583	1.92018	92.104	61.7134	5.789	0.776271	-1.58082	-0.819834	1	0	-0.604842	0.0510034	5.10034	0	1
Israel	2015	0	0	0.744896	1.13098	1.25922	1.35656	0.906772	-1.09782	0.322301	3.7	2.06055	-99.53	7.62477	-0.225691	-152.8	-2.9	-0.142637	-0.0943628	0	-0.764483	-0.0976967	-0.0449406	2.39883	-82.2236	2.2376	3.73553	92.179	58.898	5.176	2.36108	-1.37344	-0.705325	0	0	-0.591566	0.0551731	5.51731	0	0
Israel	2016	1	0	0.786592	1.03914	1.30097	1.30956	1.14718	-0.799367	0.431644	4	2.63412	-99.38	6.4695	-0.18476	-159.867	-2.79	-0.132239	-0.0909326	0	-0.731024	-0.0838268	-0.0484125	2.67098	-82.5517	4.45978	3.72366	92.256	57.799	4.723	0.348658	-1.28708	-0.657638	1	0	-0.610877	0.049108	4.91079	0	1
Israel	2017	1	0	0.697402	0.989351	1.26169	1.34879	0.790212	-0.894906	0.509236	3.9	2.87842	-99.28	6.4695	-0.175796	-160.133	-2.64	-0.0790923	-0.0865284	0	-0.688706	-0.0587073	-0.020385	2.29424	-82.6066	4.34693	4.71263	92.336	56.2801	4.14	0.00655182	-1.18336	-0.600367	1	0	-0.616275	0.0474126	4.74126	0	1
Israel	2018	1	0	0.631083	0.960164	1.23795	1.16925	0.75373	-0.9181	0.581059	3.8	3.10037	-99.38	6.4695	-0.243288	-148.267	-2.59	-0.124776	-0.0866475	0	-0.63574	-0.0997355	-0.0250405	2.28459	-79.1199	4.0039	5.71739	92.418	58.7438	3.917	0.68524	-1.13646	-0.57447	1	0	-0.604204	0.0512038	5.12038	0	1
Israel	2019	1	0	0.658973	1.01172	1.26991	1.28859	0.773935	-0.815568	0.65721	4.5	4.71589	-98.47	6.4695	-0.189656	-155.2	-2.46	-0.0742351	-0.0860692	0	-0.638346	-0.0742351	0	2.21346	-81.5227	3.7105	4.33363	92.501	56.3253	3.731	1.9164	-1.17477	-0.595628	1	0	-0.614748	0.0478924	4.78924	0	1
Israel	2020	0	1	0.651663	0.935626	1.23442	1.05196	0.536611	-0.887819	0.654305	5.6	6.20374	-97.84	6.4695	-0.272441	-170.133	-2.59	-0.134324	-0.0911908	0	-0.600053	-0.134324	0	2.0002	-77.874	-2.02162	5.10475	92.587	51.2367	4.169	1.05711	-1.12809	-0.569851	0	1	-0.619075	0.0465335	4.65335	0	1
Italy	2002	0	0	1.03865	0.740142	0.904301	0.753255	0.523467	0.83843	1.97578	5.6	19.6508	-91.04	28.747	-0.0896299	-22.8619	-2.88	-0.0635681	-0.0884652	0	-0.703118	-0.0634608	-0.000107326	2.89394	-512.432	0.26993	1.34499	67.382	47.8713	9.211	3.30501	3.27389	1.86076	0	0	-0.34473	0.132696	13.2696	0	0
Italy	2003	0	0	0.985717	0.68843	1.04489	0.743869	0.484606	0.431488	2.90686	6.2	18.5355	-90.22	28.9698	-0.0826116	-21.9497	-3.02	-0.058562	-0.0860021	0	-0.618602	-0.0584978	-6.41621e-05	2.95687	-539.679	0.0665538	1.2365	67.501	45.9941	8.869	3.16726	3.0775	1.75232	0	0	-0.33984	0.134232	13.4232	0	0
Italy	2004	0	0	1.17717	0.590004	1.08458	0.628187	0.361397	0.269258	2.68548	5.9	20.2534	-90.41	29.1926	-0.0777435	-21.0375	-2.99	-0.0564728	-0.0797829	0	-0.577875	-0.0564499	-2.28546e-05	2.80618	-543.552	1.47402	1.10882	67.62	47.2664	7.866	2.62976	3.04708	1.73552	0	0	-0.338329	0.134707	13.4706	0	0
Italy	2005	0	0	1.05703	0.509243	0.99628	0.556203	0.40358	0.489116	3.57112	6.7	18.2075	-89.8	29.4153	-0.101635	-20.0995	-3.03	-0.0765807	-0.0747143	0	-0.592339	-0.0765579	-2.27769e-05	2.8649	-544.005	0.762411	1.97118	67.738	49.1222	7.73	2.0842	3.38726	1.92336	0	0	-0.333464	0.136234	13.6234	0	0
Italy	2006	0	0	1.06452	0.379006	0.97683	0.356098	0.477288	0.530734	4.14387	7.5	18.166	-89.19	29.6381	-0.122654	-19.2049	-2.95	-0.090412	-0.0719647	0	-0.584688	-0.0903542	-5.77829e-05	2.82813	-531.266	1.79948	2.91007	67.856	52.9235	6.777	2.21589	3.42664	1.9451	0	0	-0.33209	0.136666	13.6666	0	0
Italy	2007	0	0	1.11191	0.467548	0.940307	0.191648	0.331189	0.44697	5.18592	8.7	17.0067	-88.18	29.8609	-0.116805	-18.3103	-2.89	-0.0866417	-0.0695161	0	-0.534144	-0.0865091	-0.000132614	2.68395	-545.888	1.46229	2.9685	67.974	54.828	6.076	2.46674	3.47813	1.97353	0	0	-0.330635	0.137123	13.7123	0	0
Italy	2008	0	1	1.03202	0.447921	0.974893	0.272779	0.262665	0.547544	6.28622	10.8	19.9806	-86.84	30.0837	-0.151795	-29.3491	-2.88	-0.116905	-0.0700206	0	-0.500379	-0.116729	-0.000175257	2.5306	-513.033	-1.02314	-0.393032	68.092	54.2143	6.723	2.40459	3.46827	1.96809	0	1	-0.333896	0.136099	13.6099	0	0
Italy	2009	0	1	1.03422	0.399145	0.966554	0.417277	0.19448	0.346906	7.12892	12.5	25.1354	-84.85	30.3064	-0.0907628	-18.4074	-2.84	-0.0626626	-0.0712087	0	-0.498775	-0.0624112	-0.000251462	2.75272	-457.908	-5.30515	0.751632	68.209	45.1415	7.749	1.77254	3.22547	1.83402	0	1	-0.319962	0.140475	14.0475	0	0
Italy	2010	0	0	0.962826	0.454773	0.894351	0.4673	0.283444	0.473924	7.28204	12.8	26.5709	-84.63	30.5292	-0.107793	-18.4663	-2.86	-0.0756451	-0.0679389	0	-0.54335	-0.0752939	-0.0003512	2.74948	-462.895	1.52911	0.462974	68.327	51.6621	8.363	0.59784	3.14299	1.78848	0	0	-0.313535	0.142493	14.2493	0	0
Italy	2011	0	0	0.911824	0.483443	0.713233	0.403479	0.299566	0.501207	6.72126	11.9	28.0582	-84.47	30.7112	-0.156006	-18.5252	-2.75	-0.117937	-0.0664203	0	-0.516891	-0.117462	-0.000475709	2.99271	-458.361	0.695463	1.49397	68.444	54.4722	8.359	1.72878	3.08201	1.75481	0	0	-0.317879	0.141129	14.1129	0	0
Italy	2012	0	1	0.916809	0.42594	0.744578	0.447511	0.172011	0.508218	8.38548	14.4	31.4795	-82.2	30.8931	-0.169646	-18.5841	-2.72	-0.128314	-0.0683296	0	-0.561581	-0.128314	0	3.42728	-448.401	-3.12524	0.00166359	68.684	54.8845	10.655	1.70238	3.06105	1.74323	0	1	-0.310158	0.143554	14.3554	0	0
Italy	2013	0	1	0.954193	0.436259	0.778938	0.532427	0.0709059	0.495499	9.42741	16.3	39.3087	-79.97	31.0751	-0.155477	-18.6211	-2.67	-0.116143	-0.0680149	0	-0.523777	-0.116143	0	3.39279	-400.231	-1.81803	0.907077	68.979	54.0342	12.149	1.12578	3.09913	1.76426	0	1	-0.301683	0.146216	14.6216	0	0
Italy	2014	0	1	0.999259	0.422147	0.638066	0.472872	0.00565775	0.458165	9.53764	17.1	43.7427	-78.59	31.257	-0.138452	-18.6147	-2.52	-0.0998509	-0.0668053	0	-0.509998	-0.0998509	0	3.53096	-379.086	-0.00138762	0.783743	69.272	54.4545	12.683	0.902551	3.34294	1.89888	0	1	-0.303163	0.145751	14.5751	0	0
Italy	2015	0	0	1.03491	0.288354	0.712537	0.490197	0.0265776	0.363257	9.5658	16.6	38.994	-79.41	31.439	-0.0819093	-18.6083	-2.6	-0.0566669	-0.0669795	0	-0.644119	-0.0566669	0	3.35795	-385.253	0.885668	0.720886	69.565	55.4357	11.896	0.782776	3.25042	1.8478	0	0	-0.30135	0.14632	14.632	0	0
Italy	2016	0	0	1.0352	0.366415	0.697885	0.544245	0.0815547	0.355933	9.51149	16.1	37.9133	-79.87	31.621	-0.0473052	-18.558	-2.54	-0.0271468	-0.0604479	0	-0.63591	-0.0271468	0	3.47366	-380.846	1.23622	1.35957	69.855	54.4321	11.688	1.24817	2.95118	1.68257	0	0	-0.308318	0.144132	14.4132	0	0
Italy	2017	0	0	0.990754	0.319134	0.691279	0.491924	0.175231	0.29291	9.68493	16.4	35.7423	-80.09	31.8029	-0.0639986	-18.5078	-2.54	-0.0404722	-0.0578841	0	-0.624378	-0.0404722	0	3.30629	-397.046	1.6037	0.443342	70.144	57.583	11.211	0.709822	2.82848	1.61482	0	0	-0.307019	0.14454	14.454	0	0
Italy	2018	0	0	0.963442	0.240624	0.715148	0.408853	0.215687	0.326272	9.63926	17.1	40.0899	-79.02	31.9849	-0.0992013	-18.4575	-2.47	-0.068788	-0.0584482	0	-0.601804	-0.068788	0	3.27831	-371.707	0.826647	2.1077	70.438	59.275	10.61	1.07058	2.92492	1.66807	0	0	-0.30252	0.145953	14.5953	0	0
Italy	2019	0	0	0.905108	0.272417	0.942924	0.45093	0.233935	0.381114	9.94553	17.3	40.0522	-78.87	32.167	-0.0824926	-18.5452	-2.43	-0.0581062	-0.0587833	-0.00509288	-0.637794	-0.0530133	0	3.23652	-365.963	0.429163	1.77067	70.736	58.6942	9.951	1.04701	2.77697	1.58638	0	0	-0.301874	0.146156	14.6156	0	0
Italy	2020	0	1	1.05461	0.206683	0.487741	0.360755	0.509536	0.399345	10.6436	18.7	42.3735	-77.58	32.3489	-0.0559705	-18.4356	-2.47	-0.0451702	-0.0639132	-0.00977101	-0.617271	-0.0353992	0	3.02513	-336.078	-8.86822	-0.89387	71.039	53.9395	9.164	1.5774	2.91799	1.66424	0	1	-0.294696	0.14841	14.841	0	0
Jamaica	2002	0	0	0.597427	-0.344298	0.235489	-0.0776224	-0.511592	-0.20823	6.59749	8	2.00433	-93.16	48.7987	-1.2282	-11.0347	-5.57	-0.308294	-0.306545	-0.0448743	-2.26654	-0.073673	-0.189746	0.51271	-10.2723	1.99729	4.56631	52.251	81.8468	6.619	9.08385	0.755426	0.470156	0	0	-0.0944892	0.211288	21.1288	0	0
Jamaica	2003	1	0	0.519186	-0.500724	0.2143	-0.0183236	-0.43517	-0.384525	6.34696	8.1	2.47299	-93.37	49.1445	-1.2475	-11.3086	-5.61	-0.367777	-0.280327	-0.0667003	-2.51192	-0.119365	-0.181711	0.377633	-10.6427	3.66632	7.24796	52.437	88.1506	6.535	11.6241	0.680839	0.428972	1	0	-0.0775129	0.21662	21.662	0	0
Jamaica	2004	0	0	0.396904	-0.412029	0.151438	0.125265	-0.393378	-0.345669	5.9853	6.4	2.78371	-93.62	49.4903	-1.88693	-11.5825	-5.57	-0.483291	-0.25323	-0.076433	-2.43116	-0.108402	-0.298456	0.307037	-10.6101	1.32373	5.49763	52.625	89.3181	6.539	12.8586	0.675501	0.426024	0	0	-0.0704946	0.218824	21.8824	0	0
Jamaica	2005	0	0	0.418053	-0.410604	0.165575	-0.17019	-0.34286	-0.298737	5.15503	5.4	3.01886	-94.35	49.8361	-2.23829	-11.8564	-5.4	-0.622399	-0.234689	-0.0871444	-2.32494	-0.16586	-0.369395	0.406868	-10.5932	0.893798	5.67333	52.811	90.4879	6.577	11.4687	0.574793	0.370418	0	0	-0.0734217	0.217905	21.7905	0	0
Jamaica	2006	0	0	0.620726	-0.396133	0.217925	0.18977	-0.291285	-0.320164	5.07606	4.8	3.35903	-94.45	50.1819	-3.34936	-12.1303	-5.96	-1.14843	-0.229782	-0.0922912	-2.61395	-0.5394	-0.516744	0.383076	-11.9875	2.89913	7.0606	52.998	100.746	6.605	8.84819	0.90016	0.550073	0	0	-0.0049503	0.239409	23.9409	0	0
Jamaica	2007	0	0	0.637016	-0.350273	0.269618	0.322975	-0.338424	-0.256037	5.33666	5.3	4.01885	-94.21	50.5277	-3.50488	-12.4041	-5.93	-1.12509	-0.248387	-0.0707174	-2.55029	-0.506257	-0.54812	0.356277	-11.9313	1.43195	6.34319	53.184	101.244	6.606	11.3208	0.83278	0.512868	0	0	-0.0054814	0.239243	23.9243	0	0
Jamaica	2008	0	1	0.579975	-0.297387	0.250679	0.314201	-0.3367	-0.3073	6.14999	5.9	5.62542	-93.29	50.8735	-3.01995	-12.678	-4.78	-1.25659	-0.274163	-0.0443752	-1.96466	-0.852235	-0.35998	0.330715	-9.5316	-0.811737	10.0413	53.371	113.577	6.666	13.5468	0.899425	0.549667	0	1	-0.0637368	0.220947	22.0947	0	0
Jamaica	2009	0	1	0.577552	-0.401666	0.218496	0.276933	-0.321955	-0.363818	6.98976	7.4	5.18575	-92.35	51.2193	-1.93834	-12.9519	-3.98	-0.66157	-0.300119	-0.016019	-1.90024	-0.521604	-0.123948	0.31798	-7.6904	-4.3453	4.00286	53.557	86.8851	7.314	11.6565	0.606763	0.38807	0	1	-0.12868	0.20055	20.055	0	0
Jamaica	2010	0	1	0.462828	-0.432372	0.233888	0.297299	-0.265739	-0.429541	7.64915	8.9	5.38215	-91.62	51.5651	-1.66862	-13.2258	-3.77	-0.333985	-0.265599	0	-1.67976	-0.195396	-0.138589	0.458604	-7.3087	-1.45715	1.4052	53.743	80.9204	7.63	9.81024	0.854475	0.524848	0	1	-0.160236	0.190639	19.0639	0	0
Jamaica	2011	0	0	0.479151	-0.371135	0.245247	0.291849	-0.187364	-0.0629833	8.58954	9.8	6.43233	-90.59	51.9162	-2.25616	-13.4997	-3.94	-0.675994	-0.278792	0	-1.61284	-0.463844	-0.21215	0.564109	-7.2453	1.73038	1.19599	53.93	83.8218	8.034	5.79619	1.0333	0.62359	0	0	-0.131134	0.199779	19.9779	0	0
Jamaica	2012	0	1	0.486025	-0.346987	0.176541	0.0459933	-0.285973	0.120508	10.1138	12.2	6.94085	-88.98	52.2672	-1.83118	-13.7736	-3.82	-0.56891	-0.25855	0	-1.48039	-0.425943	-0.142967	0.517902	-6.6535	-0.613636	2.79146	54.132	82.0401	8.695	6.5719	0.990752	0.600095	0	1	-0.142287	0.196277	19.6277	0	0
Jamaica	2013	0	0	0.543374	-0.319506	0.184493	0.0747434	-0.304508	0.182374	9.96873	11.4	6.58965	-89.26	52.6183	-1.78136	-14.0475	-4.01	-0.544064	-0.260491	0	-1.71714	-0.406873	-0.137191	0.769814	-7.1207	0.517686	3.81898	54.35	83.2596	9.698	8.41582	0.986307	0.59764	0	0	-0.130843	0.199871	19.9871	0	0
Jamaica	2014	0	0	0.562574	-0.237061	0.0736076	0.202608	-0.325879	0.0244925	10.4133	11.9	7.13991	-88.72	52.9693	-1.78235	-14.3214	-3.88	-0.520628	-0.2854	0	-1.78	-0.379891	-0.140737	0.778903	-6.8687	0.689822	4.18836	54.584	84.741	9.046	6.92995	1.09795	0.659285	0	0	-0.13155	0.199649	19.9649	0	0
Jamaica	2015	0	0	0.608759	-0.191494	0.0153093	0.294699	-0.284242	0.0859657	10.0928	12.1	7.1475	-89.04	53.3204	-1.266	-7.66885	-3.86	-0.13579	-0.285573	0	-1.79315	0	-0.13579	0.776065	-6.7389	0.921487	6.51901	54.833	76.1175	8.825	6.65541	1.20359	0.717616	0	0	-0.147621	0.194601	19.4601	0	0
Jamaica	2016	0	0	0.68136	-0.173105	0.0965704	0.473698	-0.208746	0.295468	8.53333	11.1	8.32625	-90.42	53.6787	-1.28915	-12.4734	-4.22	-0.177013	-0.274761	-0.00532856	-2.01638	-0.0599155	-0.111769	0.894852	-7.2648	1.37522	6.5921	55.098	76.4552	8.634	4.66411	1.40727	0.830079	0	0	-0.131034	0.199811	19.9811	0	0
Jamaica	2017	0	0	0.691001	-0.134216	0.0620442	0.552664	-0.224284	0.298303	8.46431	11	11.6884	-89.92	54.0379	-1.52839	-12.344	-3.87	-0.333708	-0.262655	-0.0250141	-1.87763	-0.150645	-0.158049	1.18551	-6.9702	0.997123	6.002	55.378	83.5232	7.399	6.54983	1.15436	0.690432	0	0	-0.13728	0.197849	19.7849	0	0
Jamaica	2018	0	0	0.592913	-0.218187	0.129099	0.595468	-0.230745	0.423994	7.28282	8.9	12.2654	-91.16	54.397	-1.72958	-12.2145	-4.27	-0.436036	-0.250372	-0.0353446	-2.22885	-0.22533	-0.175361	1.20919	-8.3745	1.88992	4.92423	55.674	89.9779	5.47	4.99324	0.993362	0.601536	0	0	-0.104627	0.208104	20.8104	0	0
Jamaica	2019	0	0	0.612631	-0.311448	0.0844047	0.588936	-0.113761	0.38831	6.73115	9.2	12.0105	-91.8	54.7553	-0.364234	-12.085	-4.41	-0.209525	-0.241797	-0.0440693	-2.22321	-0.165456	0	1.2745	-8.1224	0.892292	4.20331	55.985	90.1106	4.987	3.1825	1.15098	0.688569	0	0	-0.12624	0.201316	20.1316	0	0
Jamaica	2020	0	1	0.624158	-0.241394	0.0424815	0.528546	-0.0458293	0.258682	7.91107	11.7	13.1253	-90.03	55.1145	-0.322433	-11.0464	-3.63	-0.177461	-0.264358	-0.0807381	-2.39844	-0.096723	0	0.69819	-5.5385	-9.92032	1.91929	56.311	90.1106	6.501	3.46419	0.859583	0.527668	0	1	-0.134959	0.198578	19.8578	0	0
Japan	2002	0	0	1.01447	1.14855	0.49534	1.01685	0.93694	1.17602	1.23354	3.7	9.85339	-81.55	68.2963	-0.0132277	-19.6395	-4.62	-0.00440108	-0.0937903	0	-0.572972	-0.00382941	-0.000571677	1.67512	-1309.88	0.0419625	0.276304	81.647	20.4471	5.386	-1.39098	1.37737	0.81357	0	0	-0.119637	0.20339	20.339	0	0
Japan	2003	0	0	1.0826	1.16399	1.06997	1.15746	1.16987	1.02712	1.27793	4.2	11.2211	-83.97	68.321	-0.0142574	-19.5605	-4.52	-0.00494946	-0.0894284	0	-0.555888	-0.00447958	-0.000469887	1.68289	-1302.71	1.53513	0.194079	83.196	21.3261	5.251	-1.6077	1.20604	0.718969	0	0	-0.12434	0.201913	20.1913	0	0
Japan	2004	0	0	1.04349	1.24947	1.13442	1.34332	1.20001	1.02832	1.32695	4.3	10.9195	-82.3	68.3457	-0.0134382	-19.4814	-4.56	-0.00543413	-0.0839494	0	-0.535175	-0.00482691	-0.000607218	1.65868	-1296.77	2.18612	0.153848	84.64	23.6644	4.734	-1.12477	1.09491	0.657608	0	0	-0.121997	0.202649	20.2649	0	0
Japan	2005	0	0	1.00628	1.2244	1.25873	1.28549	1.21012	1.03577	1.50191	4	9.57878	-81.23	68.3704	-0.016946	-19.4023	-4.46	-0.00660573	-0.0817927	0	-0.571371	-0.00577756	-0.000828175	1.65938	-1311.8	1.8039	0.113001	85.978	26.23	4.446	-1.19402	1.03949	0.627007	0	0	-0.123817	0.202077	20.2077	0	0
Japan	2006	0	0	0.954123	1.35153	1.2602	1.58496	1.32085	1.13833	1.55025	4.4	10.5871	-81.07	68.3951	-0.0193075	-19.3233	-4.4	-0.00738602	-0.0778062	0	-0.617436	-0.00607683	-0.00130919	1.62853	-1286.98	1.37235	-0.0520879	87.118	30.0164	4.192	-0.862018	0.932384	0.567866	0	0	-0.12282	0.202391	20.239	0	0
Japan	2007	0	0	0.969946	1.31983	1.12918	1.44126	1.23023	1.01037	1.69196	4.3	9.27298	-83.01	68.4198	-0.0226743	-19.2442	-4.3	-0.00805559	-0.0758803	0	-0.668409	-0.00685505	-0.00120054	1.59789	-1325.77	1.48397	0.472323	88.146	32.8166	3.888	-0.705244	0.80471	0.497369	0	0	-0.125575	0.201525	20.1525	0	0
Japan	2008	0	1	0.948859	1.30867	1.13207	1.45175	1.32389	0.894625	1.75093	4.4	9.46142	-82.64	68.4444	-0.0239725	-19.0665	-4.19	-0.00833104	-0.0756281	0	-0.592769	-0.00739202	-0.000939018	1.5327	-1259.21	-1.22429	0.482209	89.103	34.1295	4.002	-0.91153	0.828213	0.510347	0	1	-0.133439	0.199055	19.9056	0	0
Japan	2009	0	1	1.02105	1.28708	1.09657	1.4501	1.36922	0.976252	1.84469	4.5	9.66563	-80.63	68.4691	-0.019449	-18.8888	-4.26	-0.00718387	-0.0780493	0	-0.56075	-0.00579568	-0.0013882	1.597	-1194.23	-5.69324	0.231146	89.989	24.3902	5.068	-0.569565	0.754816	0.469819	0	1	-0.132749	0.199272	19.9272	0	0
Japan	2010	1	0	1.04071	1.31966	1.01668	1.52235	1.55362	0.879353	2.23515	4.7	9.67868	-80.6	68.4938	-0.0200969	-18.8383	-4.3	-0.00773285	-0.0732208	0	-0.55899	-0.00572949	-0.00200337	1.52441	-1252.74	4.09792	0.129204	90.812	28.4985	5.102	-1.88074	0.825699	0.508958	1	0	-0.127582	0.200895	20.0895	0	0
Japan	2011	0	0	1.07113	1.3037	1.07426	1.46691	1.55438	0.995092	2.48665	4.8	10.4971	-89.43	68.4818	-0.021677	-18.7877	-3.98	-0.00896895	-0.0735553	0	-0.564314	-0.00636661	-0.00260235	1.5153	-1304.32	0.0238095	-0.0136483	91.069	30.195	4.55	-1.62208	0.715551	0.448139	0	0	-0.144179	0.195683	19.5682	0	0
Japan	2012	0	0	1.1013	1.35137	1.13758	1.40799	1.61895	0.948443	2.58421	4.7	10.0761	-94.22	68.4697	-0.0200902	-18.7371	-3.83	-0.00804476	-0.0735664	0	-0.60429	-0.00606057	-0.00198418	1.49802	-1338.8	1.37475	0.0087202	91.148	30.4709	4.358	-0.756093	0.677451	0.427102	0	0	-0.151667	0.193331	19.3331	0	0
Japan	2013	0	0	1.10959	1.43588	1.10895	1.61051	1.64825	1.01914	2.74374	5	10.8588	-94.29	68.4576	-0.0232127	-18.6866	-3.78	-0.00761566	-0.0746015	0	-0.7571	-0.00612049	-0.00149517	1.46403	-1362.77	2.0051	0.204293	91.226	33.9788	4.038	-0.354375	0.706986	0.44341	0	0	-0.144864	0.195467	19.5467	0	0
Japan	2014	0	0	1.03605	1.59787	1.13797	1.80541	1.69021	0.968597	2.78381	5.6	12.3604	-94.42	68.4455	-0.0280709	-18.636	-3.64	-0.00948278	-0.0769471	0	-0.806875	-0.00823172	-0.00125106	1.39365	-1313.55	0.296206	0.403355	91.304	37.4314	3.589	1.68629	0.581356	0.374041	0	0	-0.146861	0.19484	19.484	0	0
Japan	2015	0	0	0.988049	1.48507	1.20365	1.75317	1.52977	1.05422	2.90858	6.2	14.1788	-93.38	68.4335	-0.0289687	-18.5854	-3.53	-0.00928161	-0.0765132	0	-0.887759	-0.00801194	-0.00126966	1.3474	-1276.94	1.56063	0.118162	91.381	35.4274	3.385	2.1113	0.550122	0.356795	0	0	-0.144845	0.195473	19.5473	0	0
Japan	2016	0	0	0.983571	1.38373	1.41658	1.78483	1.48224	0.968189	3.09264	6.4	14.6994	-92.58	68.4225	-0.0251769	-18.5349	-3.48	-0.00637407	-0.076184	0	-0.809942	-0.00528544	-0.00108863	1.34962	-1278.57	0.753827	0.818482	91.457	31.3102	3.132	0.419944	0.622267	0.396631	0	0	-0.148145	0.194437	19.4437	0	0
Japan	2017	0	0	1.00366	1.52946	1.36364	1.57989	1.48123	1.10013	3.38869	6.9	16.1979	-91.15	68.4088	-0.0384459	-18.4419	-3.44	-0.00744889	-0.0739133	0	-0.845359	-0.00630232	-0.00114657	1.32914	-1260.06	1.67533	0.38132	91.535	34.4232	2.822	-0.0743495	0.566062	0.365596	0	0	-0.144556	0.195564	19.5564	0	0
Japan	2018	0	0	0.994713	1.49385	1.33423	1.63459	1.38859	1.03756	3.65652	7.3	17.0619	-88.7	68.4088	-0.0367554	-18.3953	-3.36	-0.00940489	-0.0745912	0	-0.836024	-0.00800149	-0.00140339	1.32376	-1220.22	0.643391	0.501685	91.616	36.6099	2.467	-0.000237506	0.52365	0.342178	0	0	-0.145185	0.195366	19.5366	0	0
Japan	2019	0	1	0.929692	1.49643	1.31465	1.55004	1.431	1.01981	3.82973	7.8	18.5791	-88.21	68.4088	-0.0932287	-18.2326	-3.29	-0.0344979	-0.0750916	0	-0.82851	-0.00692067	-0.0275772	1.28485	-1185.31	-0.402169	0.780785	91.698	35.2164	2.351	0.634803	0.674261	0.42534	0	1	-0.144616	0.195545	19.5545	0	0
Japan	2020	0	1	0.9829	1.47148	1.34709	1.5473	1.46371	1.02615	3.9664	8.5	20.2917	-88.93	68.4088	-0.0969972	-18.2326	-3.2	-0.0283125	-0.0773211	0	-0.81748	-0.00458701	-0.0237255	1.23304	-1116.68	-4.16876	1.2383	91.782	31.3352	2.809	0.933912	0.568239	0.366798	0	1	-0.148586	0.194298	19.4298	0	0
Kazakhstan	2002	1	0	-1.0726	-1.20243	-0.693716	-1.07465	-1.11358	0.358549	0.0570987	2.8	15.2377	-97.93	1.16382	-23.0853	-34.5921	-8.7	-16.4064	-0.51487	0	-11.1671	-15.3493	-1.05704	0.51363	-251.721	9.8	10.5067	56.244	94.0317	9.33	5.80322	-0.890685	-0.438765	1	0	1.18833	0.61418	61.4179	1	0
Kazakhstan	2003	1	0	-1.09171	-1.0969	-0.403342	-0.765002	-1.02652	0.35626	0.0612833	2.3	13.4657	-98.51	1.16106	-22.8778	-35.6799	-8.64	-14.7331	-0.470823	0	-10.5059	-13.8371	-0.895979	0.818326	-280.3	9.3	8.0537	56.317	91.4633	8.78	11.7385	-1.02325	-0.51196	1	0	1.08237	0.580902	58.0902	1	0
Kazakhstan	2004	1	0	-1.12853	-1.12647	-0.472707	-0.776483	-1.10595	0.070388	0.0413334	1.9	11.9501	-98.96	1.15829	-28.2541	-36.7366	-9.29	-18.0676	-0.430415	0	-8.62341	-16.5778	-1.48974	2.22472	-299.938	9.6	13.0129	56.39	96.4092	8.4	16.1316	-0.970528	-0.482851	1	0	1.22543	0.625832	62.5832	1	0
Kazakhstan	2005	1	0	-1.03167	-0.953236	-0.281208	-0.670579	-1.01496	0.190632	0.0225318	2.1	11.6438	-98.67	1.15552	-30.2818	-38.5392	-8.48	-20.9794	-0.43164	0	-7.63432	-19.842	-1.13739	2.09009	-325.011	9.7	4.45711	56.463	97.7625	8.13	17.8748	-1.04623	-0.524649	1	0	1.31854	0.655075	65.5075	1	0
Kazakhstan	2006	1	0	-1.18963	-1.10212	-0.343308	-0.477032	-0.995143	0.207938	0.0337332	2.1	10.7456	-98.83	1.15275	-28.7905	-33.007	-9.12	-20.461	-0.407102	0	-6.34197	-17.7794	-2.68159	0.808639	-364.34	10.7	9.39606	56.536	91.4535	7.79	21.5517	-0.747429	-0.359664	1	0	1.23544	0.628974	62.8974	1	0
Kazakhstan	2007	1	0	-1.16358	-1.0319	-0.350908	-0.665854	-0.992245	0.647997	0.0388128	1.8	10.7052	-98.89	1.14998	-26.4915	-35.4468	-9.14	-11.0741	-0.396025	0	-5.55925	-8.84826	-2.22584	0.999386	-364.615	8.9	11.419	56.609	92.1616	7.26	15.5271	-0.625847	-0.292531	1	0	0.771101	0.483141	48.3141	1	0
Kazakhstan	2008	0	0	-1.09226	-0.926386	-0.294381	-0.524132	-0.980641	0.626638	0.0999581	1.1	9.21234	-98.95	1.14721	-33.248	-31.8104	-9.35	-13.4552	-0.379435	0	-5.69453	-12.1693	-1.28591	0.798725	-402.479	3.3	12.6039	56.682	94.2948	6.63	20.9365	-0.662183	-0.312594	0	0	1.00783	0.557491	55.7491	1	0
Kazakhstan	2009	0	0	-1.0756	-0.723441	-0.268264	-0.440471	-0.931519	0.776816	0.104825	1.3	8.63931	-99.05	1.14444	-21.5859	-33.4732	-8.39	-9.43032	-0.337575	0	-5.7336	-8.26436	-1.16596	1.15204	-367.372	1.2	12.3806	56.755	75.7661	6.55	4.69109	-0.760904	-0.367105	0	0	0.628038	0.43821	43.821	1	0
Kazakhstan	2010	1	0	-1.13226	-0.69564	-0.283094	-0.492905	-1.00106	0.522972	0.0729043	1.4	9.70648	-98.79	1.14167	-21.7441	-37.0008	-8.52	-10.1978	-0.326171	0	-5.10168	-8.04715	-2.15066	1.05063	-383.369	7.3	5.03631	56.827	74.1383	5.77	19.5423	-0.81417	-0.396516	1	0	0.623272	0.436713	43.6713	1	0
Kazakhstan	2011	1	0	-1.12137	-0.641634	-0.235386	-0.511159	-0.996685	-0.338571	0.1016	1.4	9.12388	-98.93	1.15844	-25.7688	-34.1103	-8.87	-12.5671	-0.30582	0	-4.44039	-10.3611	-2.20599	0.919999	-387.781	7.4	7.14351	56.9	73.1179	5.39	20.543	-0.587469	-0.27134	1	0	0.773096	0.483768	48.3768	1	0
Kazakhstan	2012	1	0	-1.17672	-0.772899	-0.39058	-0.525389	-0.921266	-0.408455	0.0804435	1.3	8.19145	-98.88	1.1752	-21.9827	-33.2401	-8.07	-11.1328	-0.278837	0	-4.22486	-8.89271	-2.24007	0.913768	-371.083	4.8	6.56165	56.973	73.7237	5.29	4.78557	-0.681524	-0.323274	1	0	0.617927	0.435034	43.5035	1	0
Kazakhstan	2013	1	0	-1.24271	-0.71641	-0.375283	-0.620735	-0.931236	-0.402474	0.0808514	1.2	7.50481	-99.19	1.19196	-18.2187	-35.0117	-8.41	-9.24072	-0.246917	0	-3.97421	-7.34702	-1.8937	0.904862	-374.666	6	4.2307	57.046	65.4076	5.2	9.49908	-0.607753	-0.28254	1	0	0.488366	0.394344	39.4344	0	0
Kazakhstan	2014	1	0	-1.18407	-0.609487	-0.239126	-0.0820106	-0.825699	0.0360182	0.0479592	1.3	8.73063	-99	1.20873	-17.2501	-35.8664	-6.44	-8.76262	-0.228102	0	-3.54525	-7.1312	-1.63142	0.728498	-321.7	4.2	3.30063	57.118	64.972	5.06	5.77124	-0.635077	-0.297627	1	0	0.370811	0.357424	35.7424	0	0
Kazakhstan	2015	0	0	-1.16385	-0.515273	-0.0906947	-0.146881	-0.871616	-0.0383531	0.0691337	1.7	10.3259	-98.45	1.22549	-9.32877	-33.6597	-5.36	-4.38911	-0.211218	0	-3.83874	-3.56742	-0.821687	0.61363	-291.278	1.2	3.56737	57.191	53.0497	4.93	1.82355	-0.537466	-0.24373	0	0	0.0609129	0.260095	26.0095	0	0
Kazakhstan	2016	0	0	-1.20535	-0.513149	-0.16123	-0.142129	-0.83216	0.00146297	0.0652416	2.1	12.7041	-98.45	1.23633	-11.0337	-33.6131	-6.21	-5.52878	-0.207031	0	-5.86258	-3.72608	-1.80269	0.671503	-301.99	1.1	12.5466	57.264	60.3116	4.96	13.6384	-0.254756	-0.0876285	0	0	0.230519	0.313362	31.3362	0	0
Kazakhstan	2017	1	0	-1.24521	-0.487276	0.154858	-0.0658256	-0.839968	0.0243497	0.0821905	2	11.3314	-98.92	1.24716	-14.8976	-34.8873	-6.08	-7.49529	-0.192173	0	-5.40099	-5.54141	-1.95388	0.82723	-324.395	4.1	2.85206	57.336	56.8254	4.9	11.2111	-0.219477	-0.0681485	1	0	0.341485	0.348213	34.8213	0	0
Kazakhstan	2018	1	0	-1.20075	-0.503466	0.0946239	-0.0420836	-0.492212	-0.0524023	0.0807707	1.9	10.245	-99	1.25799	-20.783	-36.5843	-6.65	-11.4269	-0.191932	0	-5.39559	-9.02732	-2.39954	0.858206	-323.845	4.1	0.196995	57.428	63.528	4.85	9.20561	-0.19796	-0.0562677	1	0	0.604658	0.430867	43.0867	1	0
Kazakhstan	2019	1	0	-1.22944	-0.510017	0.107312	0.0688471	-0.286037	-0.168037	0.0933565	1.9	10.5762	-98.59	1.26882	-17.926	-36.5439	-6.27	-9.73025	-0.188969	0	-5.44088	-7.87587	-1.85438	0.878477	-305.535	4.5	2.05368	57.54	64.8586	4.8	7.63329	-0.222753	-0.0699578	1	0	0.488595	0.394415	39.4415	0	0
Kazakhstan	2020	0	1	-1.17964	-0.46709	0.106147	0.105691	-0.378143	-0.257567	0.0786589	1.8	10.9315	-98.43	1.27965	-12.8407	-38.2051	-5.83	-6.85603	-0.187208	0	-5.29762	-3.90181	-2.95422	0.857345	-308.43	-2.5	4.212	57.671	57.0264	4.89	4.21086	-0.261189	-0.0911803	0	1	0.24728	0.318626	31.8626	0	0
Korea, Rep.	2002	1	0	0.745628	0.92001	0.752522	0.796305	0.489189	0.241774	0.804531	0.7	1.68491	-83.12	66.7238	-0.0319099	-44.9776	-6.82	-0.0179229	-0.168353	0	-1.49311	-0.00753056	-0.0103923	2.16446	-493.758	7.72514	0.872878	80.299	58.353	3.046	3.03314	-2.94659	-1.57396	1	0	-0.0858427	0.214004	21.4004	0	0
Korea, Rep.	2003	0	0	0.723234	0.800299	0.717727	0.790477	0.544912	0.248543	0.910695	0.8	2.05873	-81.81	66.625	-0.0345912	-44.9925	-6.74	-0.0153507	-0.160755	0	-1.39743	-0.00644889	-0.00890186	2.20549	-496.247	3.14729	0.99756	80.652	61.1746	3.348	3.44999	-2.58888	-1.37645	0	0	-0.0912579	0.212303	21.2303	0	0
Korea, Rep.	2004	1	0	0.728531	0.909604	0.793975	0.815539	0.378849	0.428843	0.981669	0.8	1.66853	-82.17	66.5193	-0.0311351	-45.0075	-6.59	-0.0106071	-0.156795	0	-1.35392	-0.0104698	-0.000137299	2.09837	-516.922	5.19739	1.6761	81.002	70.0157	3.42	3.12788	-2.81296	-1.50017	1	0	-0.0977165	0.210275	21.0275	0	0
Korea, Rep.	2005	1	0	0.745596	0.974223	0.805073	0.924597	0.592333	0.485129	1.02901	0.9	1.43791	-80.44	66.4068	-0.0351494	-45.0224	-6.37	-0.017879	-0.15032	0	-1.20555	-0.0172904	-0.00058858	2.09179	-518.951	4.30854	1.45932	81.345	68.3248	3.482	1.0414	-2.45994	-1.30525	1	0	-0.109806	0.206478	20.6478	0	0
Korea, Rep.	2006	1	0	0.690555	0.837952	0.720585	0.984208	0.300606	0.423855	1.15866	0.9	1.42183	-80.21	66.2944	-0.037536	-45.0224	-6.15	-0.0194446	-0.143362	0	-1.13927	-0.01854	-0.00090461	2.0251	-525.127	5.26433	0.869897	81.528	70.6519	3.254	-0.223196	-2.52539	-1.34139	1	0	-0.119401	0.203464	20.3464	0	0
Korea, Rep.	2007	1	0	0.699741	1.01055	0.920579	1.20182	0.569717	0.566255	1.25724	1	1.47015	-81.51	66.1752	-0.0436459	-45.0224	-6.05	-0.0206655	-0.139157	0	-1.10903	-0.0201005	-0.000564972	2.15767	-538.547	5.79955	0.752754	81.631	73.8745	3.013	2.4192	-2.38267	-1.26258	1	0	-0.126144	0.201347	20.1347	0	0
Korea, Rep.	2008	0	0	0.657144	0.860505	0.725824	0.994487	0.425825	0.420969	1.36101	1.1	1.62302	-80.68	66.0357	-0.0753402	-45.0224	-6	-0.0346044	-0.135242	0	-1.31913	-0.0339893	-0.000615057	2.0664	-545.565	3.01298	1.06818	81.733	95.5164	2.959	2.8263	-2.21532	-1.17018	0	0	-0.116604	0.204343	20.4343	0	0
Korea, Rep.	2009	0	0	0.707633	0.994239	0.849306	1.02482	0.499742	0.409628	1.36518	1.2	1.72213	-81.29	65.8964	-0.0579313	-45.0224	-6.01	-0.0255818	-0.136457	0	-1.54321	-0.0249326	-0.000649145	1.80163	-555.089	0.792699	0.955769	81.835	86.1336	3.363	3.60864	-1.98143	-1.04103	0	0	-0.105937	0.207693	20.7693	0	0
Korea, Rep.	2010	1	0	0.741072	1.00821	0.918371	1.14782	0.426657	0.325896	1.42794	1.3	1.8896	-82.44	65.7099	-0.07464	-45.0224	-6.14	-0.0430352	-0.12772	0	-1.43473	-0.0421614	-0.000873752	2.05782	-609.83	6.80482	0.83043	81.936	91.3996	3.324	2.7375	-2.16248	-1.141	1	0	-0.106164	0.207621	20.7621	0	0
Korea, Rep.	2011	1	0	0.726919	1.02559	0.982293	1.15794	0.483322	0.412496	1.52199	1.4	2.04663	-82.41	65.6137	-0.0914176	-45.0224	-6.17	-0.0560592	-0.12508	0	-1.4157	-0.05492	-0.00113919	1.80306	-640.544	3.68567	0.779788	81.923	105.566	2.992	1.28186	-2.48324	-1.31811	1	0	-0.101373	0.209126	20.9126	0	0
Korea, Rep.	2012	0	0	0.725596	0.984836	0.865391	1.0745	0.495882	0.267103	1.67607	1.6	2.0999	-82.81	65.4301	-0.100818	-45.0224	-6.09	-0.0547474	-0.127031	0	-1.44388	-0.050543	-0.00420441	1.8877	-651.319	2.40253	0.743001	81.851	105.458	2.812	1.25181	-2.64879	-1.40952	0	0	-0.104079	0.208276	20.8276	0	0
Korea, Rep.	2013	0	0	0.705781	0.945141	0.988612	1.0034	0.581018	0.278579	1.82603	1.9	2.39361	-83.78	65.2495	-0.0723717	-45.0224	-5.91	-0.0408034	-0.130111	0	-1.40499	-0.039648	-0.0011554	1.77405	-652.832	3.16471	0.931438	81.779	97.9521	2.747	1.01854	-2.69027	-1.43243	0	0	-0.112756	0.205551	20.5551	0	0
Korea, Rep.	2014	0	0	0.680197	1.00596	1.13404	1.03529	0.512006	0.108569	2.12142	2.9	2.52441	-81.9	65.1442	-0.0640736	-45.0224	-5.83	-0.0357427	-0.131339	0	-1.32762	-0.0350954	-0.000647312	1.76048	-647.723	3.20245	0.6247	81.707	90.6144	3.082	0.906897	-2.07399	-1.09214	0	0	-0.116096	0.204502	20.4502	0	0
Korea, Rep.	2015	0	0	0.631044	0.90274	1.09933	0.977552	0.339695	0.156361	2.17719	2.7	2.59846	-81.38	65.0316	-0.036748	-45.0224	-5.76	-0.0165635	-0.13107	0	-1.43747	-0.0162226	-0.000340959	1.68364	-664.661	2.8091	0.279945	81.634	79.1325	3.546	3.1856	-2.02929	-1.06746	0	0	-0.114055	0.205143	20.5143	0	0
Korea, Rep.	2016	0	0	0.641615	1.12697	1.10262	1.02125	0.420221	0.153577	2.29009	2.6	3.52219	-81.98	64.8791	-0.0331102	-45.0224	-5.79	-0.0142326	-0.126444	0	-1.469	-0.0137284	-0.000504139	1.68364	-680.499	2.94688	0.807126	81.562	73.6038	3.65	1.98604	-2.04638	-1.07689	0	0	-0.111334	0.205998	20.5998	0	0
Korea, Rep.	2017	0	0	0.758165	1.13097	1.09451	1.02912	0.445519	0.381831	2.53255	2.8	4.00292	-83.17	64.7831	-0.0386023	-45.0224	-5.61	-0.0154955	-0.128257	0	-1.43799	-0.0150658	-0.000429777	1.68364	-694.768	3.15964	1.10364	81.503	77.1209	3.653	2.22278	-1.85539	-0.971441	0	0	-0.118931	0.203612	20.3612	0	0
Korea, Rep.	2018	0	0	0.79972	1.19954	1.09375	1.13526	0.572805	0.638124	2.4388	3.2	4.5733	-84.74	64.6739	-0.0471215	-45.0224	-5.45	-0.0234888	-0.132339	0	-1.42671	-0.0232473	-0.000241565	1.68364	-699.555	2.9074	0.706085	81.459	78.9889	3.824	0.482949	-1.75016	-0.913335	0	0	-0.12551	0.201546	20.1546	0	0
Korea, Rep.	2019	0	0	0.751629	1.15621	1.05926	1.33255	0.704865	0.547198	2.38162	3.2	5.42968	-83.07	64.5184	-0.121453	-45.0224	-5.29	-0.0556886	-0.139018	0	-1.49533	-0.018595	-0.0370936	1.68364	-680.592	2.24398	0.583394	81.43	75.7571	3.746	-0.839325	-1.67326	-0.870875	0	0	-0.125676	0.201493	20.1493	0	0
Korea, Rep.	2020	0	1	0.822829	1.14742	1.02495	1.37019	0.698268	0.608338	2.40889	3.6	6.4486	-81.05	64.416	-0.113271	-45.0224	-5.25	-0.0393291	-0.148316	0	-1.51126	-0.0103498	-0.0289793	1.68364	-647.506	-0.709415	0.533043	81.414	69.034	3.931	1.56375	-1.6918	-0.881111	0	1	-0.125377	0.201588	20.1588	0	0
Kyrgyz Republic	2002	0	1	-1.01542	-0.853914	-0.14087	-0.563407	-1.06477	-0.614731	0.147923	28.3	90.4798	-65.89	6.2078	-3.30962	-18.9843	-6.34	-2.96601	-1.08229	0	-6.47089	-0.158578	-2.80744	0.502874	-0.8094	-0.0173246	0.290349	35.295	82.9207	2.065	2.0253	-2.8777	-1.53592	0	1	0.170459	0.2945	29.45	0	0
Kyrgyz Republic	2003	1	0	-1.02784	-0.76016	-0.405867	-0.556116	-1.03282	-1.09949	0.138951	30.5	92.7466	-65.06	6.23323	-3.40244	-18.176	-6.3	-2.23638	-0.961784	0	-6.32534	-0.135047	-2.10133	0.529382	-1.4944	7.03029	2.37334	35.293	83.9328	2.162	3.97456	-2.73624	-1.45781	1	0	0.154572	0.28951	28.951	0	0
Kyrgyz Republic	2004	1	0	-1.01614	-0.793167	-0.389383	-0.65761	-1.09771	-1.18347	0.140967	27.7	93.087	-67.12	6.25867	-3.4153	-17.3677	-5.8	-2.0597	-0.840972	0	-5.81517	-0.169034	-1.89067	0.50662	-1.4378	7.02681	7.9338	35.292	93.8157	2.259	5.10869	-2.54183	-1.35047	1	0	0.110632	0.27571	27.571	0	0
Kyrgyz Republic	2005	0	1	-0.887551	-1.12324	-1.00808	-0.875677	-1.26727	-1.17443	0.1392	28	93.8849	-66.03	6.2841	-3.0997	-16.5594	-5.89	-1.91029	-0.836495	0	-5.19829	-0.397961	-1.51232	0.50942	-1.5334	-0.175515	1.73012	35.29	95.084	2.362	7.12862	-2.7074	-1.44189	0	1	0.0886884	0.268818	26.8818	0	0
Kyrgyz Republic	2006	0	0	-0.759082	-1.31729	-0.656035	-0.815081	-1.32556	-1.38557	0.141433	27.8	94.0061	-66.6	6.30953	-1.82532	-15.7511	-5.62	-0.937948	-0.847225	0	-4.68282	-0.392173	-0.545776	0.553603	-1.3946	3.1029	6.42244	35.289	120.75	2.48	9.39162	-2.52355	-1.34037	0	0	0.0161824	0.246047	24.6046	0	0
Kyrgyz Republic	2007	1	0	-0.962736	-1.32195	-0.416845	-0.786064	-1.3291	-0.99026	0.122109	24.5	94.4309	-70.3	6.33496	-1.07231	-15.7511	-6.04	-0.45355	-0.763102	0	-4.44085	-0.0938339	-0.359716	0.53771	-2.7459	8.54287	5.46787	35.287	137.058	2.577	14.8766	-2.69246	-1.43364	1	0	-0.012049	0.23718	23.718	0	0
Kyrgyz Republic	2008	1	0	-1.09176	-1.38291	-0.350436	-0.799226	-1.23224	-0.567302	0.114923	22	91.2639	-74.41	6.3604	-4.3016	-15.7511	-6	-2.51686	-0.671999	0	-4.08556	-0.11916	-2.3977	0.63407	-4.1343	8.40162	7.33454	35.285	146.106	2.642	22.216	-2.81828	-1.50311	1	0	0.0594234	0.259627	25.9627	0	0
Kyrgyz Republic	2009	0	0	-1.01985	-1.32975	-0.333194	-0.969546	-1.31283	-0.622969	0.126693	24.7	91.1125	-72.99	6.38583	-4.4568	-15.7511	-5.33	-2.98431	-0.624554	0	-4.14079	-0.0637806	-2.92053	0.294698	-4.0175	2.88629	4.03784	35.284	133.379	2.744	4.0353	-2.83446	-1.51205	0	0	0.0579598	0.259167	25.9167	0	0
Kyrgyz Republic	2010	0	1	-0.934311	-1.26946	-0.261395	-0.656764	-1.1751	-1.03965	0.135329	25.6	93.0132	-70.52	6.41126	-9.8089	-15.7511	-5.11	-7.26842	-0.644582	0	-4.04236	-0.0871619	-7.18126	0.203749	-3.7399	-0.471567	9.86092	35.306	133.233	2.887	10.0339	-2.51815	-1.33739	0	1	0.232859	0.314097	31.4097	0	0
Kyrgyz Republic	2011	1	0	-0.682987	-1.19611	-0.223706	-0.636238	-1.23197	-1.09803	0.114004	26	94.3997	-70.1	6.43434	-10.2034	-15.7511	-5.8	-8.11472	-0.61022	0	-4.10359	-0.122964	-7.99176	0.152803	-5.7752	5.95627	11.0646	35.352	136.18	2.999	22.4818	-2.62772	-1.39789	1	0	0.290324	0.332145	33.2145	0	0
Kyrgyz Republic	2012	0	1	-0.611097	-1.13485	-0.344608	-0.646593	-1.15086	-0.911251	0.0918709	22.4	93.4797	-73.87	6.45741	-3.58092	-15.7511	-7.25	-2.41025	-0.544041	0	-4.85663	-0.110791	-2.29945	0.179405	-7.9593	-0.0881502	3.95037	35.423	139.676	3.114	8.65632	-2.70931	-1.44294	0	1	0.13195	0.282405	28.2405	0	0
Kyrgyz Republic	2013	1	0	-0.538331	-1.11533	-0.325828	-0.64999	-1.1623	-0.911774	0.0852055	24.8	93.4744	-71.84	6.48049	-5.71912	-15.7511	-6.16	-4.35112	-0.495257	0	-4.38673	-0.0967632	-4.25436	0.180976	-7.8561	10.9155	8.34375	35.517	134.027	3.153	3.17519	-2.50659	-1.33101	1	0	0.156368	0.290074	29.0074	0	0
Kyrgyz Republic	2014	1	0	-0.462574	-0.936237	-0.45019	-0.871007	-1.13008	-0.804616	0.0760261	26.6	91.2545	-71.48	6.50357	-4.07204	-15.7511	-6.21	-2.97488	-0.457988	0	-4.56669	-0.0885889	-2.88629	0.168208	-8.7452	4.02404	4.59301	35.635	125.126	3.262	8.41523	-2.30631	-1.22042	1	0	0.109163	0.275249	27.5249	0	0
Kyrgyz Republic	2015	1	0	-0.404145	-1.01452	-0.536658	-0.978849	-1.17952	-0.88243	0.0779924	23.5	85.132	-74.77	6.52664	-4.2531	-15.7511	-5.82	-3.23325	-0.447593	0	-5.56475	-0.00499353	-3.22826	0.160515	-9.2071	3.87583	17.1312	35.777	110.962	3.338	3.42729	-2.39602	-1.26995	1	0	0.129434	0.281615	28.1615	0	0
Kyrgyz Republic	2016	1	0	-0.418316	-1.04515	-0.386156	-0.965182	-1.10505	-0.65202	0.0260181	22.2	86.6973	-74.05	6.54974	-5.61349	-15.7511	-5.41	-4.34784	-0.425045	0	-5.39622	-0.0105497	-4.33729	0.167321	-8.9578	4.33586	9.08868	35.944	105.824	3.474	6.05056	-2.35717	-1.2485	1	0	0.15548	0.289795	28.9795	0	0
Kyrgyz Republic	2017	1	0	-0.428767	-0.947072	-0.379888	-0.75118	-1.07768	-0.362506	0.0372689	24.7	91.5587	-70.92	6.57281	-8.75574	-15.7511	-5.15	-6.80542	-0.39951	0	-4.81281	-0.0212546	-6.78417	0.152128	-9.3127	4.73994	-1.39184	36.135	100.617	3.57	6.32715	-2.2701	-1.20043	1	0	0.238897	0.315994	31.5994	0	0
Kyrgyz Republic	2018	1	0	-0.354232	-0.928701	-0.397319	-0.646289	-0.961097	-0.529712	0.0450802	23.4	92.2274	-74.36	6.66788	-4.67048	-15.7511	-5.89	-3.4998	-0.393094	0	-5.4957	-0.0295206	-3.47028	0.148054	-11.4349	3.75791	1.74369	36.351	98.8756	3.67	3.44745	-2.3615	-1.25089	1	0	0.151043	0.288402	28.8402	0	0
Kyrgyz Republic	2019	1	0	-0.453696	-0.914637	-0.392827	-0.731618	-0.960631	-0.265568	0.0445691	28.3	91.6917	-70.31	6.76298	-7.2432	-15.7511	-4.97	-6.06465	-0.407769	0	-5.06478	-0.0225371	-6.04211	0.128896	-10.5005	4.60063	4.30961	36.591	94.4303	4.295	9.81131	-2.30551	-1.21998	1	0	0.208395	0.306414	30.6414	0	0
Kyrgyz Republic	2020	0	1	-0.576769	-0.962204	-0.450061	-0.576322	-1.12496	-0.455793	0.0359946	30	90.7499	-68.07	6.85808	-6.52758	-15.7511	-5.04	-4.7587	-0.420126	0	-5.14074	-0.0103845	-4.74831	0.12256	-9.6385	-7.14898	-4.85485	36.856	78.9923	4.63	5.34019	-2.42753	-1.28735	0	1	0.175354	0.296037	29.6037	0	0
Lithuania	2002	1	0	0.904892	0.397895	1.07703	0.494155	0.20888	0.893211	8.22185	17.9	4.42977	-53.66	32.7058	-0.809313	-17.2451	-6.73	-0.333082	-0.152488	-0.0466358	-1.60264	-0.286446	0	2.22183	-13.1632	6.71984	4.62664	66.828	100.332	13.008	0.315154	-2.65388	-1.41233	1	0	-0.100174	0.209503	20.9503	0	0
Lithuania	2003	1	0	0.920531	0.485247	1.0383	0.72968	0.353011	1.05019	8.23216	18.1	5.09031	-52.41	32.9451	-0.731872	-16.586	-6.36	-0.228212	-0.155813	0	-1.28835	-0.228212	0	2.16603	-14.0139	10.5519	1.15581	66.737	98.0914	12.874	-0.812341	-2.93825	-1.56935	1	0	-0.12792	0.200789	20.0789	0	0
Lithuania	2004	1	0	0.882494	0.560759	1.05815	0.691371	0.369521	0.766005	8.55089	18.1	4.92892	-53.62	33.1844	-0.655049	-15.9269	-6.05	-0.201926	-0.141529	0	-1.18911	-0.201926	0	1.97697	-15.4405	6.50204	3.86728	66.646	104.072	10.684	3.12115	-3.04833	-1.63014	1	0	-0.142835	0.196104	19.6104	0	0
Lithuania	2005	1	0	0.902133	0.577139	0.936665	0.755011	0.311571	0.7791	9.4677	17.5	5.60741	-60.15	33.4237	-0.590099	-15.2678	-5.3	-0.180457	-0.150727	0	-1.16317	-0.180457	0	1.85657	-17.3978	7.73145	4.95131	66.635	117.45	8.325	6.37315	-3.60988	-1.9402	1	0	-0.17565	0.185798	18.5798	0	0
Lithuania	2006	1	0	0.861288	0.706575	0.973232	0.716516	0.155885	0.870996	10.2371	17.5	6.72969	-61.41	33.6631	-0.55005	-14.956	-4.86	-0.144991	-0.155175	0	-1.0797	-0.144991	0	1.82967	-18.1012	7.39548	7.50222	66.706	124.614	5.78	6.48507	-3.55206	-1.90828	1	0	-0.194936	0.179741	17.9741	0	0
Lithuania	2007	1	0	0.886552	0.6859	1.01004	0.655761	0.103202	0.817852	9.69436	17.1	7.98172	-61.26	33.9024	-0.480123	-14.6442	-4.74	-0.0965965	-0.174518	0	-0.891866	-0.0965965	0	1.79703	-18.4915	11.0779	6.54806	66.777	116.296	4.25	8.91211	-3.34746	-1.7953	1	0	-0.20828	0.17555	17.555	0	0
Lithuania	2008	0	0	0.849656	0.684018	1.04218	0.56174	0.112552	0.746765	10.2298	18.3	8.53942	-60.52	34.1444	-0.439415	-11.9961	-4.65	-0.101241	-0.171623	0	-0.757221	-0.101241	0	1.67147	-18.467	2.59946	3.61122	66.848	126.76	5.826	9.71608	-3.18567	-1.70597	0	0	-0.209163	0.175273	17.5273	0	0
Lithuania	2009	0	1	0.902185	0.722069	0.951838	0.689942	0.226648	0.631581	11.3701	20.1	9.10985	-55.65	34.3837	-0.401931	-9.34799	-5.02	-0.0550824	-0.168579	0	-0.844425	-0.0550824	0	2.0152	-14.3781	-14.8386	-0.960671	66.842	105.04	13.785	-3.08953	-3.25517	-1.74434	0	1	-0.185894	0.182581	18.2581	0	0
Lithuania	2010	0	0	0.915655	0.776326	0.960123	0.738228	0.372422	0.715261	14.1072	21.5	28.9805	-74.62	34.6231	-0.524773	-6.69987	-3.97	-0.0632546	-0.168009	0	-0.976179	-0.0632546	0	1.88628	-12.2287	0.4272	3.0097	66.757	131.627	17.814	2.12172	-3.13287	-1.67681	0	0	-0.205161	0.17653	17.653	0	0
Lithuania	2011	1	0	0.860526	0.768031	0.926462	0.698799	0.319815	0.6712	13.2924	22.7	35.0118	-74.27	34.6779	-0.552724	-4.05175	-3.88	-0.0895931	-0.162806	0	-0.836375	-0.0895931	0	1.79355	-12.9007	6.32364	4.35509	66.741	149.645	15.39	5.62228	-3.00738	-1.60753	1	0	-0.201349	0.177727	17.7727	0	0
Lithuania	2012	1	0	0.92951	0.844754	1.11775	0.82673	0.38667	0.78621	14.5654	23.9	33.6506	-73.35	34.7321	-0.503342	-3.47219	-3.78	-0.0762159	-0.149326	0	-0.891353	-0.0762159	0	1.72534	-13.6174	4.38291	1.58556	66.864	156.639	13.365	2.50518	-2.89872	-1.54753	1	0	-0.200214	0.178084	17.8084	0	0
Lithuania	2013	1	0	0.940006	0.829999	1.14701	0.8259	0.418842	0.964532	16.1454	26.3	43.5531	-70.61	34.7858	-0.451433	-2.89263	-3.44	-0.055199	-0.134196	0	-0.805012	-0.055199	0	1.7768	-12.7034	4.04691	1.66004	66.986	156.627	11.77	0.833828	-2.85444	-1.52308	1	0	-0.199912	0.178178	17.8178	0	0
Lithuania	2014	1	0	0.961605	0.937466	1.18877	0.977036	0.553396	0.742136	17.1593	27.7	50.0341	-68.35	34.854	-0.435667	-2.31307	-3.33	-0.0452597	-0.115367	0	-0.762427	-0.0452597	0	1.82464	-13.575	3.77254	0.739699	67.108	143.29	10.698	0.609191	-2.84236	-1.51641	1	0	-0.194051	0.180019	18.0019	0	0
Lithuania	2015	0	0	0.973996	0.978209	1.26381	1.15047	0.582567	0.74975	18.9303	29	47.6992	-67.49	34.9082	-0.355872	-2.4696	-3.3	-0.0204097	-0.113615	0	-0.963767	-0.0204097	0	1.77898	-15.195	2.83281	2.49622	67.23	138.196	9.12	-0.00225278	-2.9965	-1.60152	0	0	-0.187037	0.182222	18.2222	0	0
Lithuania	2016	0	0	1.00021	0.996741	1.12458	1.03286	0.676384	0.814721	18.9972	31.5	62.9395	-66	34.9606	-0.337759	-1.99159	-3.29	-0.0123381	-0.107154	0	-0.96887	-0.0123381	0	1.96701	-15.4325	2.67192	2.74031	67.366	134.69	7.862	0.987472	-2.80703	-1.4969	0	0	-0.168745	0.187967	18.7967	0	0
Lithuania	2017	1	0	0.98663	0.961514	1.14623	0.929403	0.518652	0.765566	18.9771	33.8	74.4411	-65.08	35.0569	-0.408009	-1.67529	-3.3	-0.0148151	-0.0911188	0	-0.912018	-0.0148151	0	1.96548	-16.3819	4.61224	2.89746	67.516	144.918	7.073	4.09579	-2.53293	-1.34555	1	0	-0.15329	0.192821	19.2821	0	0
Lithuania	2018	1	0	0.90156	0.923098	1.09371	1.03145	0.466042	0.729237	19.06	33.7	77.8468	-64.71	35.095	-0.378396	-1.64547	-3.22	-0.0158777	-0.0921955	0	-0.876331	-0.0158777	0	2.1208	-17.0629	4.91837	2.3955	67.679	147.202	6.147	3.59301	-2.47515	-1.31364	1	0	-0.155448	0.192143	19.2143	0	0
Lithuania	2019	1	0	0.994788	0.98599	1.14662	1.00767	0.666306	0.770624	18.8266	33.5	77.3458	-64.97	35.1325	-0.334182	-1.64547	-3.06	-0.0083146	-0.0918348	0	-0.905173	-0.0083146	0	2.01853	-16.9679	4.67735	6.23035	67.855	148.375	6.255	2.37586	-2.43725	-1.29272	1	0	-0.161213	0.190333	19.0333	0	0
Lithuania	2020	0	0	1.00418	0.948482	1.08017	1.01491	0.778561	0.921477	20.1425	31.7	60.8066	-65.7	35.1485	-0.310783	-1.64547	-3	-0.00407264	-0.0944903	0	-0.861028	-0.00407264	0	2.08823	-15.9097	0.0428158	7.94345	68.046	135.797	8.487	2.03874	-2.62116	-1.39427	0	0	-0.184727	0.182948	18.2948	0	0
Madagascar	2002	0	1	-0.153443	-0.209682	-0.297508	-0.324264	0.00122348	-0.225308	88.7665	87.2	68.1407	-10.12	22.246	-3.50535	-3.97767	-8.62	-3.56988	-2.29464	-3.56988	-0.42952	0	0	0.314192	-56.4485	-12.408	0.273965	27.663	50.1817	5.502	16.4985	0.795306	0.492177	0	1	0.365407	0.355726	35.5726	0	0
Madagascar	2003	1	0	0.0445495	-0.246574	-0.334958	-0.41609	-0.208431	0.622444	86.7206	84.8	67.7936	-12.1	22.1654	-5.21856	-3.98289	-8.32	-5.30747	-2.0471	-5.30747	-0.51981	0	0	0.451755	-57.4549	9.78489	0.202026	27.936	34.0306	5.01	-1.704	1.09162	0.655791	1	0	0.463796	0.386627	38.6627	0	0
Madagascar	2004	1	0	0.0053627	-0.274372	-0.384915	-0.587859	-0.323701	0.24557	86.5327	84.3	64.6943	-12.29	22.0848	-6.16054	-3.98811	-8.21	-6.24748	-1.89728	-6.24678	-0.728935	0	-0.000697059	0.864958	-58.0124	5.257	1.04469	28.211	48.7754	3.946	13.9558	0.814526	0.502789	1	0	0.522169	0.40496	40.496	0	0
Madagascar	2005	1	0	-0.123797	-0.352792	-0.292556	-0.380154	-0.0555556	-0.0185726	87.3386	84.9	65.3347	-11.5	22.0042	-5.46553	-3.99332	-8.02	-5.58204	-1.81457	-5.5818	-0.693502	0	-0.000243446	0.955941	-60.4317	4.75585	1.45801	28.814	59.1301	2.62	18.3638	0.992426	0.601019	1	0	0.473801	0.389769	38.9769	0	0
Madagascar	2006	1	0	-0.110259	-0.448409	-0.250744	-0.655423	-0.182528	0.185515	88.3038	85.9	63.4109	-10.59	21.9236	-5.6246	-3.99332	-7.79	-5.75618	-1.69988	-5.75431	-0.643638	0	-0.0018661	1.38675	-60.7074	5.39851	4.60749	29.425	62.1028	2.946	10.7656	1.13635	0.680489	1	0	0.472664	0.389412	38.9412	0	0
Madagascar	2007	1	0	-0.139065	-0.389402	-0.287419	-0.499809	-0.186033	0.0896257	88.1771	86.2	68.4351	-10.63	21.843	-6.43425	-3.99332	-7.65	-6.49977	-1.63791	-6.49972	-0.524913	0	-5.20215e-05	1.49387	-61.2772	5.71056	9.26012	30.043	66.7027	3.205	10.288	0.954014	0.579809	1	0	0.516438	0.40316	40.316	0	0
Madagascar	2008	1	0	-0.326153	-0.455656	-0.373599	-0.684332	-0.266752	-0.469336	88.0621	86.4	63.5868	-10.83	21.7624	-5.80937	-3.99332	-7.49	-5.86271	-1.59571	-5.8601	-0.449598	0	-0.00260484	1.64514	-61.7591	6.71263	10.5779	30.67	74.3574	3.438	7.4863	0.811473	0.501103	1	0	0.460725	0.385663	38.5663	0	0
Madagascar	2009	0	1	-0.831528	-0.732627	-0.544541	-0.841212	-0.328544	-0.733878	88.6105	87.2	67.606	-10.22	21.6818	-6.87904	-3.99332	-8.02	-6.9852	-1.71553	-6.98399	-0.492856	0	-0.00121134	1.19606	-62.0678	-3.97871	13.4485	31.301	62.4117	3.887	6.92916	0.921092	0.561631	0	1	0.561461	0.4173	41.73	0	0
Madagascar	2010	0	0	-0.845434	-0.878426	-0.60553	-0.995214	-0.417825	-0.978339	88.1781	86.7	61.0649	-10.74	21.6012	-5.80845	-3.99332	-8.5	-5.7996	-1.70676	-5.79152	-0.545132	0	-0.00808047	1.28034	-62.6423	0.61924	9.13867	31.938	57.8749	4.28	10.2185	1.00901	0.610174	0	0	0.497237	0.39713	39.713	0	0
Madagascar	2011	0	0	-0.879346	-0.894967	-0.552348	-1.06908	-0.48461	-0.705586	87.1186	84.5	51.3259	-11.88	21.569	-5.89544	-3.99332	-8.72	-5.7105	-1.66727	-5.6791	-0.576053	-9.84969e-06	-0.0313904	1.3137	-62.7784	1.57843	7.05979	32.58	56.4831	2.512	10.3862	0.915497	0.558541	0	0	0.488057	0.394247	39.4247	0	0
Madagascar	2012	0	0	-0.883271	-0.927834	-0.5761	-1.11728	-0.670311	-0.536137	85.6525	83.3	44.304	-13.3	21.5463	-6.6913	-3.99332	-8.78	-6.67031	-1.58467	-6.61285	-0.759575	-1.29985e-05	-0.0574453	1.1635	-64.0475	3.01115	7.03681	33.227	52.6517	0.599	5.46617	1.08119	0.650034	0	0	0.547028	0.412767	41.2767	0	0
Madagascar	2013	0	0	-0.763428	-0.920766	-0.65914	-1.14748	-0.764158	-0.659993	85.1081	81.4	39.4573	-13.82	21.5234	-6.77436	-3.99332	-8.35	-6.68683	-1.48866	-6.4535	-0.789266	-1.56494e-05	-0.233311	1.57661	-63.4661	2.30038	4.55465	33.878	56.3676	0.996	5.4523	1.20118	0.716283	0	0	0.519242	0.404041	40.4041	0	0
Madagascar	2014	1	0	-0.50026	-0.736947	-0.716765	-1.32274	-0.843135	-0.557236	85.0182	82.2	41.6121	-13.85	21.5007	-7.1789	-3.99332	-8.18	-7.34067	-1.38975	-7.29605	-0.832568	-0.044619	0	1.23893	-64.9979	3.3392	2.97751	34.534	61.9694	1.386	6.73177	1.37346	0.811412	1	0	0.566264	0.418809	41.8809	0	0
Madagascar	2015	0	0	-0.380922	-0.705095	-0.809338	-1.33208	-0.880302	-0.427763	84.1969	83.9	46.434	-14.65	21.478	-8.60994	-3.99332	-8.12	-8.91521	-1.32691	-8.87988	-1.04688	-0.0353303	0	1.19052	-65.3663	3.1323	2.89728	35.193	61.2204	1.785	6.50372	1.31468	0.778957	0	0	0.678065	0.453922	45.3922	1	0
Madagascar	2016	1	0	-0.316786	-0.831999	-0.735104	-1.22865	-0.934988	-0.294186	86.4983	83.8	50.9305	-12.78	21.4553	-8.77277	-3.99332	-7.9	-9.10487	-1.2578	-9.0736	-1.00355	-0.0312699	0	0.977804	-65.4289	3.99315	4.56461	35.856	60.8347	1.947	8.96008	1.3397	0.792771	1	0	0.691722	0.458211	45.8211	1	0
Madagascar	2017	1	0	-0.345471	-0.875742	-0.736413	-1.19452	-1.0743	-0.302837	85.7196	81.9	36.6687	-13.43	21.4326	-7.63974	-3.99332	-7.98	-7.84624	-1.19174	-7.79032	-1.01753	-0.0559287	0	1.06456	-65.9391	3.93331	3.52797	36.522	65.3434	2.119	4.96154	1.33731	0.791451	1	0	0.597874	0.428736	42.8736	1	0
Madagascar	2018	0	0	-0.321546	-0.836356	-0.785895	-1.21214	-1.02106	-0.578798	86.3802	84.2	44.7658	-12.57	21.4098	-5.16989	-3.99332	-8.49	-5.11794	-1.15466	-4.86308	-0.986865	-0.0762906	-0.178574	1.42488	-64.6589	3.19436	4.44793	37.191	67.8415	2.297	8.29799	1.29185	0.766351	0	0	0.44868	0.38188	38.188	0	0
Madagascar	2019	1	0	-0.235004	-1.0135	-0.788889	-1.1934	-1.05258	-0.313957	84.9945	82.5	39.6516	-14.11	21.3871	-4.70785	-3.99332	-8.58	-4.83993	-1.10729	-4.78149	-1.23424	-0.05844	0	1.54643	-66.6148	4.41123	3.3628	37.861	62.6013	2.469	6.52209	1.48823	0.874785	1	0	0.435375	0.377701	37.7701	0	0
Madagascar	2020	0	1	-0.263207	-0.879634	-0.811572	-1.05304	-1.01051	-0.509335	87.9846	84.7	42.1702	-11.18	21.3644	-5.65951	-3.99332	-9.41	-5.81012	-1.16089	-5.78029	-1.32551	-0.0298315	0	1.10277	-66.0711	-7.13767	2.74657	38.534	49.0107	3.284	4.31115	1.46767	0.863433	0	1	0.545604	0.41232	41.232	0	0
Malaysia	2002	1	0	-0.49293	0.393111	0.520823	0.921506	0.246729	0.539594	2.26317	3.5	8.06362	-96.86	59.4814	-9.81549	-0.985917	-5.54	-8.90179	-0.181597	-3.78201	-2.91609	-5.10817	-0.0116116	0	57.4141	5.39099	3.16612	63.856	199.356	3.48	3.12888	1.02422	0.618575	1	0	0.495951	0.396726	39.6726	0	0
Malaysia	2003	1	0	-0.457674	0.466075	0.59182	1.04107	0.31572	0.485535	2.01361	3.3	7.21783	-97.24	59.255	-12.156	-0.99265	-5.61	-11.0562	-0.180858	-5.21039	-2.91177	-5.83497	-0.0107976	0	45.5165	5.7885	2.92094	64.78	194.195	3.61	3.29893	1.2847	0.7624	1	0	0.632397	0.439579	43.9579	1	0
Malaysia	2004	1	0	-0.235716	0.45894	0.461176	1.04575	0.323187	0.348004	1.87264	3.2	7.47707	-97.37	59.0287	-11.9873	-0.999383	-5.66	-10.5017	-0.175649	-3.0556	-2.95097	-7.43645	-0.00966671	0	14.8942	6.78344	3.50787	65.694	210.374	3.54	6.00928	1.17978	0.704468	1	0	0.595738	0.428066	42.8066	1	0
Malaysia	2005	1	0	-0.146774	0.433445	0.634848	1.04339	0.17008	0.566449	1.65292	3	7.99419	-97.96	58.8023	-13.8843	-1.00612	-5.85	-12.1315	-0.169579	-3.50458	-2.83885	-8.61473	-0.0121931	0	-24.228	5.33214	2.73439	66.594	203.855	3.53	8.86259	1.1463	0.685982	1	0	0.699054	0.460514	46.0514	1	0
Malaysia	2006	1	0	-0.543148	0.44911	0.536536	1.23769	0.213226	0.28838	1.59114	3.1	7.83366	-97.87	58.576	-13.4761	-1.01285	-5.57	-11.9173	-0.161571	-3.87211	-2.70267	-8.03051	-0.0146964	0	4.95119	5.58485	4.72716	67.483	202.577	3.32	3.98093	1.16135	0.694291	1	0	0.668909	0.451046	45.1046	1	0
Malaysia	2007	1	0	-0.523537	0.366876	0.504325	1.22412	0.166801	0.193307	1.43233	2.8	7.01503	-98.05	58.3496	-12.6289	-1.01958	-5.59	-11.0002	-0.155706	-4.61184	-2.58158	-6.37422	-0.0141657	0	-40.2151	6.29879	4.68685	68.36	192.466	3.23	4.88132	1.1096	0.665718	1	0	0.617351	0.434854	43.4853	1	0
Malaysia	2008	1	0	-0.563193	0.247284	0.286812	1.05023	-0.0905064	0.108542	1.35458	3	8.91908	-97.83	58.1232	-13.3868	-1.02632	-5.65	-11.6246	-0.161115	-4.24613	-2.43208	-7.36453	-0.013908	0	-30.0148	4.83177	3.28082	69.225	176.668	3.32	10.3889	1.03906	0.626768	1	0	0.650164	0.445159	44.5159	1	0
Malaysia	2009	0	1	-0.503895	0.373885	0.269759	0.89537	-0.0939427	-0.0416609	1.31147	2.3	6.86624	-97.84	57.8969	-9.65216	-1.03305	-5.42	-8.31853	-0.173637	-3.58199	-2.53472	-4.71987	-0.0166657	0	-1.03409	-1.51353	0.0566923	70.075	162.559	3.66	-5.9922	1.09145	0.655695	0	1	0.439989	0.37915	37.915	0	0
Malaysia	2010	1	0	-0.499948	0.39389	0.61125	1.04648	0.0570844	0.143352	1.12765	2	6.18426	-98.12	57.6705	-9.61504	-1.03978	-5.23	-8.19264	-0.169902	-3.03235	-2.31747	-5.12314	-0.0371587	0	-19.1625	7.42485	4.26865	70.912	157.945	3.39	7.26685	1.24397	0.739914	1	0	0.412964	0.370662	37.0662	0	0
Malaysia	2011	1	0	-0.474875	0.402632	0.547135	0.986757	0.0225716	0.0774098	1.03686	2.2	6.72432	-98.05	57.985	-9.94491	-1.04652	-5.18	-7.91066	-0.168951	-2.32275	-2.07891	-5.51896	-0.0689574	0	-17.4802	5.29391	5.07446	71.609	154.938	3.05	5.41241	1.14037	0.682706	1	0	0.390744	0.363684	36.3684	0	0
Malaysia	2012	1	0	-0.346539	0.379769	0.47717	0.906338	0.213313	-0.0052124	0.902349	2.5	8.07206	-98.07	58.2994	-9.20599	-1.05325	-4.99	-7.57823	-0.174066	-2.37469	-2.11152	-5.12682	-0.0767246	0	-13.9892	5.47345	2.82906	72.275	147.842	3.1	0.999932	1.43509	0.84544	1	0	0.362715	0.354881	35.4881	0	0
Malaysia	2013	1	0	-0.339791	0.341338	0.567808	0.993432	0.333269	0.0517916	0.918333	2.8	9.48139	-98	58.6139	-8.46715	-1.05998	-5.38	-6.89453	-0.169281	-2.18388	-2.31361	-4.64388	-0.0667711	0	-29.791	4.69372	3.49431	72.93	142.721	3.16	0.174474	1.53658	0.901478	1	0	0.347241	0.350021	35.0021	0	0
Malaysia	2014	1	0	-0.360449	0.52409	0.799231	1.14594	0.396519	0.266619	0.741077	3	9.85821	-97.93	58.9283	-8.64507	-1.06672	-5.18	-7.28144	-0.170514	-2.59104	-2.43771	-4.65369	-0.036717	0	-43.052	6.00672	3.14123	73.577	138.312	2.88	2.46747	1.64474	0.961203	1	0	0.369449	0.356996	35.6996	0	0
Malaysia	2015	1	0	-0.391403	0.402504	0.704775	0.917085	0.181636	0.253947	0.789496	3.4	11.1402	-97.77	59.2428	-6.57091	-1.07345	-4.72	-5.75643	-0.172509	-1.82182	-2.80595	-3.7947	-0.13992	0	-52.0135	5.09153	3.27094	74.213	131.37	3.1	1.21806	1.7996	1.04671	1	0	0.268049	0.325149	32.5149	0	0
Malaysia	2016	1	0	-0.416714	0.387878	0.663995	0.817719	0.0274247	0.129486	0.786493	4.4	13.6711	-97.29	58.7875	-5.2004	-1.12966	-4.69	-4.62454	-0.163554	-1.65837	-2.89287	-2.95602	-0.0101526	0	-77.0713	4.44978	4.47131	74.84	126.899	3.44	1.65826	1.76425	1.02719	1	0	0.20692	0.305951	30.5951	0	0
Malaysia	2017	1	0	-0.398661	0.388218	0.671389	0.777732	-0.00609472	0.11121	0.702978	5.2	17.0432	-96.68	58.6349	-6.236	-1.15638	-4.28	-5.58579	-0.154681	-2.07385	-2.74629	-3.49624	-0.0156998	0	-37.2127	5.81272	2.93582	75.447	133.155	3.41	3.77896	1.61979	0.947427	1	0	0.248221	0.318922	31.8922	0	0
Malaysia	2018	1	0	-0.0995008	0.529206	0.575907	1.05389	0.299852	0.248114	0.935022	5.3	16.7095	-96.73	58.4822	-7.32744	-1.15638	-4.5	-6.51914	-0.15692	-2.04297	-2.75465	-4.47433	-0.00183691	0.778171	-55.7737	4.84309	2.31459	76.036	130.403	3.3	0.624675	1.54721	0.907349	1	0	0.305473	0.336903	33.6903	0	0
Malaysia	2019	1	0	-0.0477055	0.491569	0.547572	0.967775	0.232962	0.14648	1.06638	5.7	16.1812	-96.62	58.3296	-6.19636	-1.15638	-4.44	-5.48265	-0.159168	-1.83782	-2.90408	-3.64483	0	0.689622	-83.1723	4.41319	2.50698	76.607	123.029	3.26	0.0718269	1.73349	1.01021	1	0	0.248399	0.318978	31.8978	0	0
Malaysia	2020	0	1	-0.15446	0.57312	0.666613	1.02226	0.228581	0.125865	1.33169	7	17.5711	-96.08	58.177	-4.54157	-1.15638	-4.49	-4.04641	-0.174607	-1.89998	-2.98031	-2.14643	0	0.644957	-79.9519	-5.45685	1.20275	77.16	116.788	4.54	-0.818008	1.80212	1.0481	0	1	0.171092	0.294699	29.4699	0	0
Mauritius	2002	0	0	0.788583	1.00008	0.303824	0.37112	0.328717	1.11665	23.8778	17.9	27.5862	-75.42	20.3064	-0.0113185	-24.9606	-2.87	-0.01086	-0.230045	-0.01086	-1.0835	0	0	0	-3.12205	1.61492	0.653687	42.447	118.23	8.205	6.21928	-1.33758	-0.685521	0	0	-0.297046	0.147672	14.7672	0	0
Mauritius	2003	1	0	0.851995	0.924558	0.431313	0.741626	0.192946	1.00941	23.2423	18.9	27.2238	-75.84	20.132	-0.0106845	-26.3541	-2.84	-0.0103611	-0.217906	-0.0103611	-0.998591	0	0	0	-3.17411	5.92545	1.06246	42.335	108.656	8.311	5.62319	-1.05096	-0.527264	1	0	-0.30381	0.145548	14.5548	0	0
Mauritius	2004	1	0	0.840149	0.899706	0.39161	0.693027	0.152765	0.974533	23.6033	19.1	27.3566	-75.46	19.9576	-0.00681953	-25.7361	-2.77	-0.00663182	-0.208781	-0.00663182	-0.930938	0	0	0	-3.24431	4.33002	0.208398	42.223	107.028	8.337	6.84545	-1.39193	-0.715535	1	0	-0.307946	0.144249	14.4249	0	0
Mauritius	2005	0	0	0.832839	0.941243	0.412572	0.61725	0.219138	1.02775	21.7539	17.6	25.0084	-77.39	19.7833	-0.00657607	-25.1181	-2.82	-0.0064073	-0.204573	-0.0064073	-1.06267	0	0	0.662707	-3.39952	1.77754	0.635284	42.112	121.609	9.524	3.9481	-1.34692	-0.690679	0	0	-0.314846	0.142082	14.2082	0	0
Mauritius	2006	1	0	0.909174	0.83036	0.46689	0.702901	0.273244	0.78089	19.9765	16.4	22.2468	-79.49	19.6089	-0.00816435	-24.791	-2.89	-0.00793173	-0.188263	-0.00793173	-1.14619	0	0	0.767421	-4.15592	4.86554	1.51886	42	127.063	9.04	9.56788	-1.45351	-0.749537	1	0	-0.317923	0.141115	14.1115	0	0
Mauritius	2007	1	0	0.88621	0.851229	0.467717	0.750296	0.350999	0.879288	19.0993	15.7	22.4008	-80.32	19.4345	-0.00837909	-22.9008	-2.75	-0.00793138	-0.175004	-0.00793138	-1.04887	0	0	2.10401	-4.29052	5.72702	4.18107	41.889	120.876	8.475	8.30832	-1.42991	-0.736503	1	0	-0.340054	0.134165	13.4164	0	0
Mauritius	2008	1	0	0.863872	0.938419	0.74228	0.82509	0.440311	0.890551	19.8953	12.7	23.262	-79.37	19.2601	-0.00857163	-27.8444	-2.66	-0.00816179	-0.171465	-0.00816179	-0.919548	0	0	2.11127	-4.41332	5.38696	3.78089	41.777	115.489	7.17	5.68669	-1.94162	-1.01905	1	0	-0.355287	0.12938	12.938	0	0
Mauritius	2009	0	0	0.822893	0.897427	0.756105	0.799902	0.465923	0.707767	18.1008	12.8	23.6298	-81.04	19.0857	-0.011411	-22.9735	-2.52	-0.0110013	-0.174057	-0.0110013	-1.03916	0	0	2.35873	-4.41222	3.31508	2.81176	41.666	104.43	7.257	-0.654201	-2.58733	-1.37559	0	0	-0.355946	0.129173	12.9173	0	0
Mauritius	2010	1	0	0.789677	0.887274	0.801979	0.905524	0.48235	0.640259	17.7116	12.8	21.4957	-81.61	18.9113	-0.0974198	-23.1552	-2.54	-0.0513546	-0.168651	-0.00642919	-1.03323	-0.0449254	0	2.34162	-4.70292	4.3772	4.29784	41.555	113.457	7.654	1.12642	-2.9002	-1.54834	1	0	-0.356186	0.129098	12.9098	0	0
Mauritius	2011	1	0	0.795732	0.935305	0.76755	0.882514	0.463921	0.946499	17.1765	12	20.0697	-82.43	19.2148	-0.113949	-20.7561	-2.45	-0.0698247	-0.164768	-0.00433549	-0.940058	-0.0654892	0	2.55772	-4.72992	4.07754	3.76207	41.444	117.539	7.447	3.16146	-2.84154	-1.51596	1	0	-0.364205	0.12658	12.658	0	0
Mauritius	2012	1	0	0.880853	1.02396	0.931618	1.04001	0.252168	0.971312	16.3667	11.4	20.2884	-83.12	19.2058	-0.0967703	-21.1559	-2.4	-0.0457361	-0.165943	-0.00334564	-0.989817	-0.0423904	0	2.63521	-4.84192	3.49612	5.04785	41.332	119.5	7.472	2.46552	-2.89648	-1.54629	1	0	-0.368501	0.12523	12.523	0	0
Mauritius	2013	1	0	0.928623	0.966415	0.892885	0.916567	0.25194	0.944802	15.7118	11.4	20.6222	-83.64	19.1968	-0.0778092	-22.1011	-2.37	-0.039193	-0.157795	-0.00142851	-0.993764	-0.0377645	0	2.41623	-4.99672	3.36041	2.38648	41.222	113.309	7.322	4.13433	-2.9858	-1.59561	1	0	-0.369754	0.124837	12.4837	0	0
Mauritius	2014	1	0	0.939608	0.948849	1.19695	1.15004	0.31774	0.667966	14.8197	10.6	20.3517	-84.44	19.1878	-0.0835434	-22.5373	-2.33	-0.0419908	-0.165024	-0.000832403	-1.01228	-0.0411584	0	2.58555	-5.20112	3.82697	3.48445	41.111	110.59	7.467	2.1683	-2.88159	-1.53807	1	0	-0.375343	0.123081	12.3081	0	0
Mauritius	2015	1	0	0.826196	0.843553	1.13669	1.12658	0.223563	0.988632	16.8944	11.5	22.7631	-82.2	19.1788	-0.0279824	-22.2465	-2.32	-0.014435	-0.163589	-0.000647414	-1.13926	-0.0137876	0	2.48164	-5.25062	3.69056	1.8027	41	107.146	7.41	1.39953	-2.82383	-1.50617	1	0	-0.363498	0.126802	12.6802	0	0
Mauritius	2016	1	0	0.817911	0.688062	1.09485	1.01903	0.106664	0.999218	15.1745	10.3	21.9024	-83.94	19.1738	-0.0271234	-22.5373	-2.23	-0.0153183	-0.15731	-0.00316599	-1.15834	-0.0121523	0	2.41326	-5.36422	3.86247	3.00746	40.91	100.017	6.814	2.38463	-2.73429	-1.45673	1	0	-0.371298	0.124352	12.4352	0	0
Mauritius	2017	1	0	0.788255	0.670067	1.0501	0.959638	0.156348	0.962366	14.054	9.4	20.1991	-85.1	19.354	-0.00339252	-22.1738	-2.19	-0.00286919	-0.158451	-0.00286919	-1.12573	0	0	2.52296	-5.60342	3.93798	3.50017	40.841	99.7018	6.752	1.63651	-2.81352	-1.50048	1	0	-0.380043	0.121605	12.1605	0	0
Mauritius	2018	1	0	0.737608	0.710271	1.04395	0.894886	0.186286	0.859585	13.3297	9.2	20.9275	-85.54	19.3741	-0.0024072	-21.4831	-2.08	-0.00201356	-0.148801	-0.00201356	-1.08321	0	0	2.76805	-5.61482	4.00674	3.12514	40.793	96.6339	6.426	1.67539	-2.91297	-1.5554	1	0	-0.387783	0.119174	11.9174	0	0
Mauritius	2019	0	0	0.755455	0.693044	1.01627	0.862357	0.210404	0.802008	12.736	8.9	21.9524	-85.85	19.3941	-0.00235979	-21.6285	-2.06	-0.00194203	-0.144684	-0.00194203	-1.15112	0	0	2.96698	-5.69312	2.89128	3.07611	40.766	95.8458	6.331	-0.465843	-2.84693	-1.51893	0	0	-0.387907	0.119136	11.9136	0	0
Mauritius	2020	0	1	0.705349	0.886864	1.18113	0.853227	0.441047	0.873046	12.1986	9.4	24.1485	-85.95	19.4141	-0.00262996	-22.0647	-2.12	-0.00202198	-0.169033	-0.00202198	-1.26936	0	0	2.63714	-5.28852	-14.5465	1.96937	40.76	83.2396	8.626	2.57304	-2.81286	-1.50012	0	1	-0.3765	0.122718	12.2718	0	0
Mexico	2002	0	1	0.346043	-0.349208	0.438464	0.218387	-0.250572	-0.0583083	5.38321	10.7	15.0462	-88.58	35.0285	-2.74841	-17.6773	-3.47	-1.97435	-0.318747	0	-1.02519	-1.94774	-0.0266059	1.65132	-357.011	-0.236588	2.48686	75.365	45.2098	3.003	5.50232	0.177004	0.150773	0	1	-0.15405	0.192582	19.2582	0	0
Mexico	2003	0	0	0.346937	-0.377903	0.335378	0.131819	-0.241587	-0.116878	5.0479	10.2	12.1199	-89.06	34.9546	-3.35935	-18.2641	-3.67	-2.73649	-0.30579	0	-1.18704	-2.70445	-0.0320383	1.27186	-384.278	1.18554	2.37188	75.682	48.7004	3.455	4.27967	0.320477	0.229994	0	0	-0.0992851	0.209782	20.9782	0	0
Mexico	2004	1	0	0.319828	-0.40991	0.410248	0.0758338	-0.389335	-0.214082	4.98822	10.2	14.4425	-89.03	34.8806	-4.19499	-18.3863	-3.61	-3.44876	-0.279149	0	-1.18559	-3.37737	-0.071387	0.779455	-396.994	3.56544	3.06821	75.997	52.0406	3.937	8.11744	0.299163	0.218225	1	0	-0.0520482	0.224618	22.4617	0	0
Mexico	2005	0	0	0.198066	-0.38299	0.160981	0.031417	-0.34418	-0.445821	4.88572	10.3	15.1955	-88.76	34.8066	-5.58649	-18.6308	-3.73	-4.68856	-0.266118	0	-1.17038	-4.58697	-0.101597	0.360832	-422.023	2.11325	2.7422	76.308	52.5626	3.558	5.88498	0.442034	0.297113	0	0	0.0302671	0.25047	25.047	0	0
Mexico	2006	1	0	0.150474	-0.472546	0.346685	0.0504712	-0.325125	-0.636888	4.69316	9.8	15.3321	-89.16	34.7326	-6.14114	-18.8264	-3.62	-5.13525	-0.243064	0	-1.14474	-4.9443	-0.190955	0.216905	-446.724	4.80501	2.16893	76.616	54.4821	3.566	6.10715	0.209608	0.168776	1	0	0.0519464	0.257279	25.7279	0	0
Mexico	2007	0	0	0.121899	-0.542932	0.368228	0.13641	-0.341457	-0.729852	4.71685	9.5	14.0887	-88.97	34.6587	-5.75685	-19.2298	-3.53	-4.79809	-0.229615	0	-1.13743	-4.59848	-0.199612	0.217225	-462.055	2.07786	2.81399	76.92	55.2585	3.628	6.12779	0.0996274	0.108049	0	0	0.0267872	0.249377	24.9377	0	0
Mexico	2008	0	0	0.134928	-0.689284	0.312569	0.16069	-0.30985	-0.804012	4.60899	9.8	17.5374	-89.93	34.5847	-6.74083	-19.5063	-3.51	-5.58241	-0.22608	0	-1.12701	-5.42211	-0.160292	0.205478	-471.341	0.943332	2.56157	77.222	56.3653	3.874	6.31038	-0.301052	-0.113191	0	0	0.0772603	0.265229	26.5229	0	0
Mexico	2009	0	1	0.200033	-0.562869	0.177683	0.141516	-0.36596	-0.686628	4.40648	9.2	12.9471	-90.58	34.5107	-4.17264	-18.7384	-3.67	-3.40478	-0.239205	0	-1.3993	-3.22742	-0.177365	0.224074	-462.724	-6.29525	2.08304	77.52	54.5917	5.356	5.24348	-0.361425	-0.146527	0	1	-0.0437634	0.22722	22.7219	0	0
Mexico	2010	1	0	0.178502	-0.552031	0.156338	0.0962914	-0.439748	-0.726463	4.51651	9.4	16.602	-90.7	34.4367	-4.9518	-19.4694	-3.47	-3.92101	-0.220732	0	-1.26557	-3.63469	-0.28632	0.186072	-482.952	4.97133	2.76142	77.815	59.2734	5.303	4.37296	0.0280008	0.0684992	1	0	-0.0205929	0.234497	23.4497	0	0
Mexico	2011	1	0	0.121692	-0.549888	0.184377	0.252327	-0.474738	-0.667769	4.24033	9.1	14.8882	-90.63	34.3737	-7.12686	-19.4328	-3.51	-5.76856	-0.21081	0	-1.22832	-5.20529	-0.563276	0.178573	-494.727	3.44405	1.94422	78.111	62.1624	5.175	5.66963	-0.0579297	0.0210517	1	0	0.083365	0.267146	26.7146	0	0
Mexico	2012	1	0	0.112745	-0.53518	0.418743	0.296199	-0.484528	-0.662454	4.33337	9	13.7854	-91.06	34.3107	-6.64762	-20.2274	-3.48	-5.45552	-0.207645	0	-1.28315	-4.91866	-0.536867	0.135116	-510.897	3.55321	1.45259	78.405	64.2579	4.892	4.54221	-0.037567	0.0322952	1	0	0.0629477	0.260734	26.0734	0	0
Mexico	2013	0	0	0.108349	-0.549416	0.418155	0.302351	-0.591899	-0.714224	4.63378	9.2	13.2974	-90.56	34.2477	-5.63993	-19.9633	-3.45	-4.62946	-0.21532	0	-1.24284	-4.24383	-0.385625	0.149974	-502.353	0.852102	3.8367	78.699	62.6917	4.921	1.70388	0.106459	0.111821	0	0	0.0129869	0.245043	24.5043	0	0
Mexico	2014	0	0	0.000275322	-0.406688	0.359438	0.133971	-0.843019	-0.853919	4.60997	9.8	17.5322	-90.21	34.1847	-4.74356	-20.7653	-3.3	-3.83345	-0.213553	0	-1.21304	-3.57795	-0.255498	0.149734	-490.486	2.50376	2.08414	78.993	64.0984	4.819	4.36837	0.480526	0.318367	0	0	-0.0346025	0.230097	23.0097	0	0
Mexico	2015	0	0	-0.0753404	-0.454766	0.276325	0.117518	-0.888967	-0.80178	4.62913	9.2	15.2663	-90.03	34.1217	-2.18361	-20.9438	-3.16	-1.66873	-0.209473	0	-1.43657	-1.42999	-0.238734	1.28893	-499.355	2.70232	2.98783	79.285	70.413	4.311	3.22543	0.167104	0.145307	0	0	-0.174297	0.186223	18.6223	0	0
Mexico	2016	0	0	-0.0674508	-0.579801	0.199013	0.0276106	-0.850662	-0.633718	4.64799	9.2	15.2661	-90.04	34.056	-1.97525	-21.168	-3.1	-1.46421	-0.202951	0	-1.61943	-1.1483	-0.315914	1.4798	-518.022	1.77249	3.49742	79.577	75.6903	3.853	6.07759	-0.0329929	0.0348208	0	0	-0.183919	0.183201	18.3201	0	0
Mexico	2017	0	0	-0.0890548	-0.584649	0.182069	-0.0653026	-0.95243	-0.80642	5.30189	10.1	15.9833	-89.16	33.9903	-2.36149	-21.4768	-2.98	-1.75592	-0.200894	0	-1.56315	-1.42849	-0.32743	1.09803	-504.687	1.87173	2.78107	79.867	76.9521	3.419	6.56759	-0.0608613	0.0194329	0	0	-0.166725	0.188601	18.8601	0	0
Mexico	2018	0	0	-0.008685	-0.641222	0.0843755	-0.292851	-0.949164	-0.673847	4.6227	10.3	15.6687	-88.99	33.9245	-2.89111	-21.7213	-2.99	-2.32181	-0.19384	0	-1.49083	-2.06987	-0.251941	0.893681	-491.292	1.97208	3.01339	80.156	80.2127	3.275	5.2045	0.400175	0.274	0	0	-0.135377	0.198447	19.8447	0	0
Mexico	2019	0	1	0.00857096	-0.657918	0.0125952	-0.306685	-0.91745	-0.841869	4.71719	10.3	16.6424	-89.12	33.8588	-2.09126	-21.8462	-2.97	-1.67642	-0.189369	0	-1.48706	-1.51089	-0.165527	1.29498	-496.234	-0.392691	2.29639	80.444	77.462	3.477	4.31901	0.282508	0.209029	0	1	-0.176894	0.185408	18.5408	0	0
Mexico	2020	0	1	-0.0273882	-0.642182	-0.01291	-0.270339	-0.92163	-0.791456	5.06096	12.3	21.6553	-88.47	33.7931	-1.55983	-21.8944	-3.04	-1.1059	-0.202414	0	-1.60733	-0.837357	-0.268547	1.34674	-441.94	-8.35403	2.81318	80.731	76.8546	4.44	4.61979	0.34406	0.243015	0	1	-0.198363	0.178665	17.8665	0	0
Morocco	2002	1	0	-0.465829	-0.0490108	-0.0781934	-0.195086	-0.240059	-0.261419	10.4549	15.1	6.86012	-87.8	12.4135	-0.194633	-51.0793	-3.25	-0.0092902	-0.962578	0	-1.81584	-0.00619343	-0.00309677	1.48289	-59.7574	3.7302	1.02036	53.99	54.3101	11.59	0.959559	0.949733	0.577445	1	0	-0.378188	0.122188	12.2188	0	0
Morocco	2003	1	0	-0.752867	-0.112911	-0.284974	-0.215569	-0.31997	-0.407007	10.617	16.1	9.97696	-87.15	12.4512	-0.242739	-49.2517	-3.04	-0.0110518	-0.90216	0	-1.52365	-0.00450166	-0.00655011	1.51265	-60.3072	6.1711	3.98562	54.317	52.3319	11.92	0.860408	1.07308	0.64555	1	0	-0.388937	0.118812	11.8812	0	0
Morocco	2004	1	0	-0.508275	-0.0490321	-0.244661	-0.224267	-0.243783	-0.312669	16.4771	22.4	10.2475	-81.45	12.4888	-0.570191	-47.4241	-3.41	-0.112392	-0.861187	0	-1.53137	-0.00644305	-0.105949	1.37998	-66.1871	4.57138	1.35119	54.644	55.5516	10.83	0.913545	0.983418	0.596044	1	0	-0.34477	0.132683	13.2683	0	0
Morocco	2005	0	0	-0.687105	-0.269637	-0.437574	-0.403398	-0.425059	-0.556681	14.6236	20	8.22378	-84.21	12.5265	-0.73919	-45.5966	-3.51	-0.173372	-0.839022	0	-1.63357	-0.00460906	-0.168763	1.45282	-68.341	3.19225	2.42635	55.174	61.4938	11.01	0.886221	1.02505	0.619035	0	0	-0.340785	0.133935	13.3935	0	0
Morocco	2006	1	0	-0.712467	-0.318183	-0.212712	-0.269641	-0.476106	-0.461343	13.3701	18.2	8.68708	-84.79	12.5641	-1.17488	-43.769	-3.31	-0.318606	-0.776091	0	-1.61667	-0.00829052	-0.310315	1.4965	-69.8129	7.79082	3.24283	55.746	64.6722	9.67	1.44537	0.992426	0.601019	1	0	-0.339663	0.134287	13.4287	0	0
Morocco	2007	1	0	-0.707482	-0.329651	-0.215946	-0.342614	-0.386844	-0.501324	12.1052	16.6	7.92003	-85.28	12.6017	-1.48112	-41.9414	-3.33	-0.395717	-0.746261	0	-1.51559	-0.00873304	-0.386984	1.65175	-70.6924	3.44107	3.24999	56.317	71.3496	9.56	3.17154	1.08752	0.653528	1	0	-0.339976	0.134189	13.4189	0	0
Morocco	2008	1	0	-0.758324	-0.385673	-0.159162	-0.356556	-0.433666	-0.571273	10.7717	14.4	7.95091	-86.29	12.6394	-6.01356	-40.1138	-3.27	-0.774546	-0.697225	0	-1.41383	-0.00736723	-0.767178	1.56056	-74.323	5.68454	2.42214	56.886	77.8345	9.57	4.83039	1.32808	0.786353	1	0	-0.272504	0.15538	15.538	0	0
Morocco	2009	1	0	-0.745715	-0.262815	-0.0905579	-0.283303	-0.367966	-0.3983	9.68558	14.2	15.4795	-86.28	12.677	-4.04625	-38.2862	-3.16	-0.155739	-0.67945	0	-1.46957	-0.00455952	-0.151179	1.65654	-74.3485	3.74577	1.94783	57.452	62.371	8.96	-0.452559	1.21939	0.726339	1	0	-0.309815	0.143662	14.3662	0	0
Morocco	2010	1	0	-0.698601	-0.213534	-0.119565	-0.230588	-0.231424	-0.383013	8.83574	13.9	18.204	-87.1	12.7147	-5.52352	-36.4586	-3.21	-1.03944	-0.657259	0	-1.60901	-0.00703678	-1.0324	1.62845	-78.3797	3.49956	1.22998	58.018	69.542	9.09	0.647501	1.24843	0.742376	1	0	-0.256158	0.160513	16.0513	0	0
Morocco	2011	1	0	-0.709957	-0.275484	-0.176636	-0.266207	-0.452251	-0.392257	7.95934	11.8	11.3329	-88.63	12.7192	-7.44007	-36.4586	-3.29	-1.21779	-0.625518	0	-1.67428	-0.00967424	-1.20812	1.63458	-83.7723	5.52465	2.29047	58.581	76.8259	8.91	-0.598845	1.36815	0.808479	1	0	-0.229811	0.168788	16.8788	0	0
Morocco	2012	0	0	-0.605667	-0.292329	-0.110854	-0.141056	-0.49313	-0.470459	7.5965	10.9	9.47957	-89.09	12.7238	-6.48582	-36.4586	-3.24	-0.270582	-0.622116	0	-1.87423	-0.00953377	-0.261048	1.61461	-86.6301	3.06234	2.65759	59.142	78.2221	8.99	0.533172	1.52144	0.893122	0	0	-0.26358	0.158183	15.8183	0	0
Morocco	2013	1	0	-0.698654	-0.344686	-0.0910557	-0.0853617	-0.423477	-0.493018	7.38503	11.6	15.6662	-88.23	12.7283	-4.55139	-36.4586	-3.11	-0.216812	-0.600358	0	-1.76676	-0.0107876	-0.206025	1.58612	-87.6545	4.12221	2.90386	59.7	73.8578	9.23	1.26026	1.43063	0.842978	1	0	-0.293522	0.148779	14.8779	0	0
Morocco	2014	0	0	-0.688601	-0.130961	-0.027916	-0.13638	-0.305472	-0.446266	7.19069	11.1	13.7482	-88.48	12.7328	-3.5268	-36.4586	-3.07	-0.156926	-0.525815	0	-1.69279	-0.00755508	-0.149371	1.60117	-89.2929	2.71924	2.95925	60.256	71.8936	9.7	0.215438	1.59301	0.932638	0	0	-0.31635	0.141609	14.1609	0	0
Morocco	2015	1	0	-0.630444	-0.181371	-0.0984931	-0.148066	-0.286833	-0.344395	7.01515	11.2	15.5368	-88.84	12.7374	-2.61402	-36.4586	-3.02	-0.131965	-0.520141	0	-1.93244	-0.00429662	-0.127668	0.196301	-91.7703	4.34458	2.94611	60.809	67.2887	9.46	3.17294	1.55181	0.909888	1	0	-0.307732	0.144316	14.4316	0	0
Morocco	2016	0	0	-0.624226	-0.272754	-0.155641	-0.193648	-0.190851	-0.317618	6.91171	11.1	15.9137	-88.41	12.7712	-2.89821	-36.4586	-3.01	-0.143214	-0.537333	0	-1.9688	-0.0029873	-0.140226	0.230935	-92.2479	0.521186	1.93001	61.36	71.1227	9.3	0.969884	1.36482	0.80664	0	0	-0.302115	0.14608	14.608	0	0
Morocco	2017	1	0	-0.670836	-0.278358	-0.158764	-0.3052	-0.199466	-0.378089	6.52693	10.4	15.3643	-88.7	12.7976	-3.2999	-36.4586	-3	-0.171679	-0.53621	0	-2.03637	-0.00343855	-0.16824	0.221387	-96.0911	5.0579	2.26092	61.908	74.1734	9.223	-0.060891	1.29928	0.770453	1	0	-0.294971	0.148324	14.8324	0	0
Morocco	2018	0	0	-0.675591	-0.248645	-0.259155	-0.349404	-0.289455	-0.348493	6.29538	10.9	19.1881	-88.93	12.8201	-2.4139	-36.4586	-2.94	-0.18547	-0.538957	0	-2.02914	-0.00531785	-0.180152	0.233427	-98.0584	3.06564	2.78338	62.453	77.2549	9.271	0.939182	1.23084	0.732664	0	0	-0.30588	0.144898	14.4898	0	0
Morocco	2019	0	0	-0.624475	-0.233377	-0.154595	-0.251564	-0.333868	-0.345805	5.78242	10.7	19.2491	-90.72	12.8436	-0.321781	-36.4586	-3.08	-0.104267	-0.533575	0	-2.29557	-0.00552048	-0.0987466	0.24689	-105.365	2.89097	1.3348	62.994	75.9981	9.194	0.816805	1.18819	0.709112	0	0	-0.324586	0.139023	13.9023	0	0
Morocco	2020	0	1	-0.592913	-0.186951	-0.0479148	-0.186066	-0.40995	-0.359523	6.02561	11.1	18.6856	-90.09	12.8669	-0.296128	-36.4586	-3.14	-0.0829889	-0.57903	0	-2.26964	-0.00543995	-0.077549	0.31404	-101.428	-7.17821	1.16907	63.532	68.8438	11.223	0.142418	1.45606	0.857023	0	1	-0.324891	0.138927	13.8927	0	0
Mozambique	2002	1	0	-0.218986	-0.732186	-0.414854	-0.435577	-0.499133	0.188492	86.1577	93.2	99.6997	-6.87	51.8132	-7.15608	-0.94721	-23.75	-4.99303	-2.05521	-4.99123	-0.623589	-0.000916046	-0.000882586	0	-7.5113	9.66851	5.83543	29.457	73.3092	2.903	9.83188	-0.599481	-0.277973	1	0	1.18873	0.614304	61.4303	1	0
Mozambique	2003	1	0	-0.0311717	-0.70158	-0.618507	-0.538822	-0.642179	0.246099	83.6918	92.7	99.6603	-7.26	51.5314	-10.097	-0.993782	-23.38	-4.72228	-1.80116	-4.72058	-0.65046	-0.000726873	-0.000974664	0	-17.8742	7.2177	5.11426	29.637	70.1684	2.859	3.64015	-0.723353	-0.346371	1	0	1.20481	0.619355	61.9355	1	0
Mozambique	2004	1	0	-0.0339415	-0.680054	-0.493495	-0.591963	-0.613359	0.00325647	82.33	92.9	99.6041	-6.96	51.2496	-7.99533	-1.04035	-22.44	-2.47774	-1.69607	-2.20945	-0.564894	-0.267609	-0.000678648	0	-28.3545	8.2047	5.99091	29.818	72.052	2.955	5.79426	-0.840982	-0.411321	1	0	1.02363	0.562451	56.2451	1	0
Mozambique	2005	1	0	0.0083353	-0.633744	-0.741414	-0.543786	-0.534635	0.125596	82.6617	93.7	99.842	-6.51	50.9678	-7.51808	-1.08692	-21.44	-1.5515	-1.70196	-1.0968	-0.48624	-0.453578	-0.00112296	0	-39.5325	6.31202	1.38032	29.999	72.0093	3.037	7.33105	-1.10695	-0.558179	1	0	0.931487	0.533513	53.3513	1	0
Mozambique	2006	1	0	-0.0863831	-0.619978	-0.626964	-0.673949	-0.618246	0.520101	81.392	93.1	99.8661	-7.29	50.686	-8.50524	-1.12509	-20.21	-1.27431	-1.70104	0	-0.533972	-1.27034	-0.00396364	0.543556	-42.2717	9.91068	2.64086	30.182	67.3499	3.039	7.46134	-1.14172	-0.577379	1	0	0.875338	0.515879	51.5879	1	0
Mozambique	2007	1	0	-0.0817874	-0.609173	-0.636888	-0.548252	-0.512877	0.357616	74.2774	87.5	99.9206	-11.06	50.4043	-9.80505	-1.16326	-15.17	-1.12599	-1.58031	0	-0.582495	-1.12156	-0.00443003	0.568051	-45.8251	7.64935	3.85415	30.364	66.1204	3.084	7.43628	-1.18304	-0.600195	1	0	0.690377	0.457789	45.7789	1	0
Mozambique	2008	1	0	-0.0727424	-0.616658	-0.512791	-0.557204	-0.487183	0.383096	75.4592	88.1	99.9194	-10.45	50.1225	-10.2039	-1.20143	-14.49	-1.40735	-1.56287	0	-0.504574	-1.39348	-0.0138789	0.585096	-48.3771	6.87803	4.96426	30.832	64.9814	3.114	5.1528	-1.27799	-0.652619	1	0	0.68208	0.455183	45.5183	1	0
Mozambique	2009	1	0	-0.114247	-0.600408	-0.437219	-0.60031	-0.428717	0.62538	76.0698	86.1	99.9263	-10.46	49.8407	-10.022	-1.23959	-14.82	-0.910604	-1.48951	0	-0.591159	-0.880945	-0.0296588	0.717625	-50.4778	5.92897	7.58405	31.328	67.8986	3.208	1.47137	-1.24047	-0.631902	1	0	0.670342	0.451496	45.1496	1	0
Mozambique	2010	1	0	-0.120655	-0.487647	-0.453413	-0.616408	-0.436986	0.394422	71.8747	84.9	99.8571	-12.71	49.5589	-10.2685	-1.27776	-12.66	-1.21063	-1.46022	0	-0.712802	-1.20163	-0.00899676	0.773291	-54.3022	6.67973	11.0276	31.83	73.8374	3.261	7.64523	-1.32388	-0.67796	1	0	0.604936	0.430954	43.0954	1	0
Mozambique	2011	1	0	-0.199521	-0.579846	-0.473082	-0.650064	-0.496196	0.332048	72.7019	85.4	99.387	-14.02	49.2964	-11.3709	-1.31593	-14.14	-1.66244	-1.37052	0	-0.707367	-1.65007	-0.0123787	0.801024	-60.5709	7.13406	25.0624	32.336	84.4062	3.296	2.34836	-1.25346	-0.639077	1	0	0.693623	0.458808	45.8808	1	0
Mozambique	2012	1	0	-0.197661	-0.598753	-0.465775	-0.653231	-0.569022	0.390494	73.0893	84.5	99.3527	-13.72	49.0339	-11.9193	-1.35409	-13.35	-1.77578	-1.3077	0	-0.702522	-1.75958	-0.0161984	0.782904	-65.0498	7.9945	33.7671	32.846	105.935	3.305	3.17523	-1.11698	-0.563716	1	0	0.677488	0.45374	45.374	1	0
Mozambique	2013	1	0	-0.256402	-0.820203	-0.417519	-0.635946	-0.602839	-0.226966	69.0692	83.1	98.6948	-18.3	48.7714	-11.6326	-1.39226	-13.4	-1.83891	-1.24684	0	-0.802606	-1.82723	-0.0116828	0.817102	-60.5658	6.57141	38.9429	33.36	109.385	3.346	2.60124	-1.18945	-0.603733	1	0	0.670441	0.451527	45.1527	1	0
Mozambique	2014	1	0	-0.246791	-0.809285	-0.435869	-0.744967	-0.669842	-0.336003	67.7982	81.2	98.7694	-19.86	48.5089	-11.9039	-1.43043	-12.94	-0.329715	-1.20975	0	-0.934328	-0.320557	-0.00915822	0.8681	-55.8744	7.70257	27.8047	33.878	116.357	3.377	1.08587	-1.44282	-0.743635	1	0	0.592017	0.426897	42.6897	1	0
Mozambique	2015	1	0	-0.27083	-0.869379	-0.561899	-0.828704	-0.779485	-0.516436	66.9904	80.1	92.6552	-21.41	48.2464	-12.2161	-1.46859	-12.54	-0.268847	-1.17233	0	-1.22643	-0.259343	-0.0095034	0.777791	-57.3318	7.39309	23.8655	34.4	98.7612	3.426	7.05995	-1.54382	-0.799402	1	0	0.58171	0.42366	42.366	0	0
Mozambique	2016	1	0	-0.417111	-1.07516	-0.749054	-0.946212	-0.902742	-1.09681	66.762	77.4	82.5182	-23.1	47.85	-16.3134	-1.46859	-12.29	-0.496685	-1.14599	0	-2.23421	-0.318514	-0.178171	0.734085	-61.3083	4.69699	25.9188	34.926	110.394	3.457	12.1609	-1.58792	-0.823752	1	0	0.663166	0.449243	44.9243	1	0
Mozambique	2017	0	0	-0.420956	-1.00709	-0.770824	-0.956966	-0.857399	-0.918099	67.4639	78.2	80.0966	-22.4	47.5681	-18.051	-1.46859	-11.92	-0.75611	-1.12694	0	-2.10116	-0.636942	-0.119169	0.751122	-63.8169	2.63821	17.4831	35.455	105.746	3.539	7.97801	-1.76605	-0.92211	0	0	0.681054	0.45486	45.486	1	0
Mozambique	2018	1	0	-0.484721	-1.06762	-0.796631	-0.96087	-0.809046	-0.83323	67.5083	79	81.5487	-22.39	47.3361	-16.3976	-1.46859	-11.7	-0.845019	-1.09971	0	-1.87026	-0.82069	-0.0243295	0.727025	-66.921	3.48493	11.1741	35.988	124.607	3.604	3.79512	-1.84882	-0.967811	1	0	0.647929	0.444457	44.4457	1	0
Mozambique	2019	0	0	-0.544879	-1.07297	-0.780856	-0.909161	-0.872101	-0.76572	67.7386	77.5	78.7051	-22.29	47.0079	-12.6767	-1.46859	-11.56	-0.539556	-1.09909	0	-2.02363	-0.517856	-0.0217	0.782886	-64.1921	2.31781	21.7842	36.528	105.591	3.646	4.67765	-1.94874	-1.02298	0	0	0.575932	0.421845	42.1845	0	0
Mozambique	2020	0	1	-0.595091	-1.07671	-0.772883	-0.810174	-0.787528	-1.28312	69.9355	80.2	83.2542	-19.99	46.7252	-11.8639	-1.46859	-11.5	-0.349606	-1.12334	0	-2.42761	-0.317771	-0.0318356	0.661775	-62.2343	-1.21952	22.3944	37.074	99.9061	3.921	3.17166	-1.93424	-1.01498	0	1	0.581826	0.423696	42.3696	0	0
Namibia	2002	1	0	0.25194	0.27903	0.582996	0.174337	0.114023	0.148751	20.3256	33.8	92.906	-62.18	9.61637	-0.598634	-4.5763	-3.37	-0.553471	-1.66816	-0.474156	-1.26436	0	-0.0793151	0	96.0381	4.78866	4.40514	33.766	94.4152	21.5	10.0036	-1.35442	-0.694822	1	0	-0.179217	0.184678	18.4678	0	0
Namibia	2003	1	0	0.186524	0.288176	0.224924	0.25079	0.189309	0.478074	19.7902	33.3	93.706	-62.71	9.53012	-0.930611	-4.5763	-3.4	-0.765314	-1.51764	-0.554144	-0.924362	0	-0.21117	0	96.2922	4.23979	1.32166	34.709	95.9525	22.052	1.27111	-1.7189	-0.896074	1	0	-0.178903	0.184777	18.4777	0	0
Namibia	2004	1	0	0.274595	-0.0225373	0.2304	0.134863	0.115224	0.664763	19.972	34.8	94.706	-60.47	9.44387	-0.794489	-4.5763	-3.44	-0.654697	-1.39738	-0.466766	-0.78485	0	-0.187931	0	97.9273	12.2695	3.38257	35.666	81.8623	22.09	2.04025	-1.49238	-0.771	1	0	-0.183561	0.183314	18.3314	0	0
Namibia	2005	0	0	0.331787	-0.066114	0.142397	0.0727228	0.150282	0.625976	18.5372	34.6	95.4044	-60.71	9.35762	-1.18277	-4.5763	-3.55	-0.906508	-1.42985	-0.435045	-0.825699	0	-0.471463	0	93.9009	2.52926	5.37846	36.632	80.6804	22.107	5.59808	-2.02761	-1.06653	0	0	-0.168895	0.18792	18.792	0	0
Namibia	2006	1	0	0.481321	0.196436	0.173593	0.160233	0.196952	0.78225	18.6988	35.8	95.0975	-59.94	9.27137	-2.66281	-4.5763	-3.42	-1.92947	-1.34912	-0.37297	-0.782208	0	-1.55649	0.158821	91.7479	7.07318	7.62578	37.61	86.834	21.876	9.40659	-1.8697	-0.979343	1	0	-0.129605	0.20026	20.026	0	0
Namibia	2007	1	0	0.449755	0.160778	0.0460882	0.195068	0.311637	1.01876	18.9159	36.5	93.2665	-59.36	9.18512	-5.84952	-4.5763	-3.36	-4.45478	-1.35524	-0.559357	-0.787547	0	-3.89543	0.11386	88.9398	5.37404	7.57034	38.598	104.979	22.119	9.28643	-1.88727	-0.989043	1	0	-0.0201697	0.234629	23.4629	0	0
Namibia	2008	0	0	0.450896	0.437859	0.376434	0.336545	0.64115	1.20101	18.5919	32.5	70.6343	-61.99	9.09887	-2.25104	-4.5763	-3.62	-1.66405	-1.3223	-0.750971	-0.947274	0	-0.913078	0.14878	96.6363	2.64981	8.71835	39.597	119.644	22.017	10.9614	-1.9628	-1.03075	0	0	-0.149716	0.193943	19.3943	0	0
Namibia	2009	0	0	0.375795	0.252104	0.241088	0.209333	0.269764	0.929571	19.7492	33.4	65.8878	-61.63	9.01262	-1.93055	-4.5763	-3.73	-1.46511	-1.3044	-0.772385	-0.963254	0	-0.692725	0.107245	84.8958	0.295971	9.27474	40.601	123.763	22.254	6.9454	-1.73387	-0.90434	0	0	-0.155472	0.192135	19.2136	0	0
Namibia	2010	1	0	0.349807	0.214178	0.213285	0.155255	0.31552	0.84694	13.2529	31.2	97.4075	-63.91	8.92637	-2.3909	-4.5763	-3.57	-1.61406	-1.25692	-0.514976	-0.825495	0	-1.09908	0.121225	89.0366	6.03925	2.51525	41.616	108.072	22.12	3.7259	-1.61784	-0.840274	1	0	-0.14218	0.19631	19.631	0	0
Namibia	2011	1	0	0.340737	0.163114	0.0923139	0.134519	0.277477	0.911658	12.9868	31.6	90.4075	-63.63	8.84012	-2.07194	-4.5763	-3.47	-1.54393	-1.17231	-0.507095	-0.826994	0	-1.03684	0.101445	86.1534	5.09134	6.41681	42.637	102.189	19.476	3.81488	-1.79066	-0.9357	1	0	-0.15787	0.191382	19.1382	0	0
Namibia	2012	1	0	0.378439	0.304072	0.155979	0.239516	0.321496	0.978104	13.3403	31.9	88.1116	-62.77	8.75387	-1.73059	-4.5763	-3.42	-1.36368	-1.09818	-0.578081	-0.876032	0	-0.785603	0.109485	83.8882	5.06168	7.98613	43.693	100.213	16.771	11.2603	-1.71242	-0.892497	1	0	-0.165284	0.189054	18.9054	0	0
Namibia	2013	1	0	0.400195	0.319086	0.164272	0.271475	0.303885	0.95881	13.5098	30.7	95.1116	-63	8.66762	-1.17403	-4.5763	-3.39	-0.941073	-1.01229	-0.611289	-1.01993	0	-0.329783	0.111562	102.207	5.61472	6.45233	44.756	97.7249	19.028	4.03979	-1.72351	-0.898618	1	0	-0.172053	0.186928	18.6928	0	0
Namibia	2014	1	0	0.55222	0.206509	0.0766166	0.223119	0.261381	0.608741	15.2892	30.2	99.7605	-61.37	8.58137	-1.64154	-4.5763	-3.31	-1.30909	-0.902585	-0.697959	-1.07574	0	-0.611132	0.0326322	98.5897	6.09252	3.58317	45.826	103.08	18.521	8.23489	-1.54592	-0.800563	1	0	-0.14521	0.195359	19.5359	0	0
Namibia	2015	1	0	0.578277	0.237587	0.044158	0.295513	0.270016	0.72526	14.6311	29.3	93.2322	-64.35	8.49512	-1.87527	-4.5763	-3.28	-1.5931	-0.836212	-0.873277	-1.29049	0	-0.719824	0.143132	100.532	4.26417	7.40068	46.9	97.239	20.808	3.86457	-1.53147	-0.792582	1	0	-0.13485	0.198612	19.8612	0	0
Namibia	2016	0	0	0.581769	0.456786	-0.00704942	0.193663	0.280629	0.699529	15.272	29.2	90.706	-64.18	8.40887	-2.60379	-4.5763	-3.38	-2.16906	-0.823079	-0.988084	-1.41101	0	-1.18098	0.24222	104.209	0.0337945	3.3457	47.961	93.9662	23.352	7.96867	-1.56743	-0.812436	0	0	-0.102151	0.208882	20.8882	0	0
Namibia	2017	0	1	0.549889	0.276564	-0.117921	0.224055	0.261463	0.621906	14.7986	30.2	84.1806	-63.34	8.32262	-3.35579	-4.5763	-3.42	-2.49835	-0.841252	-0.795047	-1.26187	0	-1.7033	0.199336	104.664	-1.02725	2.17506	49.005	81.2197	21.733	9.91904	-1.67231	-0.870346	0	1	-0.0982012	0.210122	21.0122	0	0
Namibia	2018	0	0	0.466055	0.329324	-0.000688285	0.113765	0.306939	0.685118	15.4708	30.9	93.2903	-63.32	8.23637	-1.26283	-4.5763	-3.45	-1.0555	-0.859031	-0.509035	-1.25771	0	-0.546469	0.449005	104.837	1.05994	1.713	50.032	81.7139	19.877	4.42849	-1.75543	-0.916243	0	0	-0.16153	0.190233	19.0233	0	0
Namibia	2019	0	1	0.509257	0.361683	-0.00030195	0.100182	0.312311	0.52889	20.0301	30.2	93.706	-60	8.15012	-1.43731	-4.5763	-3.48	-1.23517	-0.82232	-0.63807	-1.40661	0	-0.5971	0.662763	104.712	-0.839152	-1.40711	51.042	82.9012	19.921	0.926316	-1.64687	-0.856301	0	1	-0.13853	0.197457	19.7457	0	0
Namibia	2020	0	1	0.55316	0.331515	0.0099776	0.052362	0.268674	0.512432	23.54	31.2	83.4642	-57	8.06387	-1.93029	-4.5763	-3.54	-1.57818	-0.813528	-0.897452	-1.56419	0	-0.680732	0.692711	105.664	-8.1014	-1.4189	52.033	76.9252	21.004	4.63153	-1.56682	-0.812099	0	1	-0.111334	0.205998	20.5998	0	0
Netherlands	2002	0	0	1.46941	1.70726	1.81921	1.93344	2.06836	1.30268	2.66829	1.9	4.14185	-94.04	10.7315	-0.552504	-87.0325	-4.17	-0.395927	-0.0932862	0	-0.732768	-0.395927	0	3.34181	-228.089	0.245786	5.35929	79.113	112.75	2.554	3.87769	-1.74161	-0.908615	0	0	-0.443046	0.101818	10.1818	0	0
Netherlands	2003	0	0	1.52679	1.70947	1.71817	1.9548	1.9959	1.16181	2.55456	1.9	4.09207	-94.14	10.7729	-0.477295	-93.0241	-4.32	-0.337958	-0.0853979	0	-0.625446	-0.337958	0	3.40939	-230.955	0.0978324	3.51222	80.341	111.305	3.593	2.28609	-1.82556	-0.954965	0	0	-0.452652	0.0988013	9.88013	0	0
Netherlands	2004	0	0	1.69661	1.73802	1.76566	2.0705	1.97552	1.01624	2.846	2.2	5.24309	-93.96	10.8143	-0.445249	-99.0157	-4.28	-0.335821	-0.0837604	0	-0.585475	-0.335821	0	3.4966	-233.234	2.01631	21.1608	81.514	116.958	4.646	1.19745	-1.87091	-0.98001	0	0	-0.461432	0.0960439	9.60438	0	0
Netherlands	2005	0	0	1.66602	1.75262	1.65411	1.93774	1.96085	0.988101	3.46343	2.7	7.45284	-92.98	10.8557	-0.345527	-105.007	-4.12	-0.25688	-0.0777266	0	-0.580103	-0.25688	0	3.61114	-226.756	2.03396	30.5012	82.63	122.256	5.872	1.97959	-1.84701	-0.966811	0	0	-0.47556	0.0916066	9.16066	0	0
Netherlands	2006	1	0	1.53982	1.76975	1.68261	1.78492	2.04053	0.902736	3.56959	3.1	8.145	-92.6	10.8972	-0.656627	-102.238	-3.95	-0.482591	-0.0731546	0	-0.550906	-0.482591	0	3.68052	-223.173	3.53738	50.9096	83.636	127.196	5.007	2.57662	-1.7524	-0.914571	1	0	-0.464534	0.0950697	9.50697	0	0
Netherlands	2007	1	0	1.52343	1.76988	1.80044	1.72177	2.15947	0.778469	3.67749	3.7	7.21034	-92.58	10.9386	-0.592989	-99.4545	-3.79	-0.444382	-0.071904	0	-0.50504	-0.444382	0	3.45422	-222.974	3.88531	85.9786	84.539	129.798	4.153	2.04943	-1.71899	-0.896122	1	0	-0.469539	0.0934977	9.34977	0	0
Netherlands	2008	0	0	1.48309	1.74963	1.77512	1.68716	2.10277	0.863552	4.16561	3.9	8.86155	-92.17	10.98	-1.04292	-97.3636	-3.68	-0.840573	-0.0744003	0	-0.489499	-0.840573	0	3.52603	-218.464	2.11682	20.4123	85.402	130.152	3.658	2.41227	-1.63949	-0.852229	0	0	-0.446149	0.100844	10.0844	0	0
Netherlands	2009	0	1	1.46439	1.80702	1.69706	1.73592	2.12416	0.945019	4.63171	4.4	9.53024	-92.81	11.0312	-0.72276	-103.727	-3.77	-0.554421	-0.0785547	0	-0.528573	-0.554421	0	3.56315	-212.572	-3.66529	23.1186	86.288	115.11	4.352	0.437661	-1.50555	-0.778272	0	1	-0.464652	0.0950325	9.50325	0	0
Netherlands	2010	0	0	1.45057	1.81173	1.72908	1.77033	2.09006	0.94075	4.33446	3.9	9.38768	-93.64	11.0726	-0.762696	-99.3636	-3.99	-0.597733	-0.0718934	0	-0.582241	-0.597733	0	3.60501	-223.989	1.31932	6.25076	87.134	130.082	4.991	0.710273	-1.57486	-0.816539	0	0	-0.448853	0.0999945	9.99945	0	0
Netherlands	2011	0	0	1.53705	1.81257	1.80484	1.821	2.0814	1.11363	4.82159	4.7	10.8107	-92.12	11.0246	-1.02063	-92.6364	-3.65	-0.778474	-0.0669605	0	-0.524903	-0.778474	0	3.41685	-211.446	1.77335	38.8133	87.879	141.757	4.977	0.242656	-1.72788	-0.901032	0	0	-0.438954	0.103103	10.3103	0	0
Netherlands	2012	0	1	1.60559	1.85268	1.74551	1.83937	2.09058	1.18746	4.91212	4.9	12.0899	-91.2	10.9733	-1.13202	-97.4545	-3.7	-0.921107	-0.0684051	0	-0.589766	-0.921107	0	3.2484	-208.919	-0.977877	30.7005	88.588	149.393	5.821	1.32913	-1.73867	-0.906991	0	1	-0.428285	0.106454	10.6454	0	0
Netherlands	2013	0	1	1.5669	1.8253	1.76092	1.80873	2.01687	1.14382	4.81118	5	11.9117	-91.33	10.9317	-1.1199	-96.7273	-3.62	-0.932413	-0.0650328	0	-0.583064	-0.932413	0	3.26704	-206.29	-0.0302326	35.1315	89.187	150.652	7.241	1.14493	-2.11008	-1.11207	0	1	-0.431002	0.105601	10.5601	0	0
Netherlands	2014	0	0	1.54721	1.97343	1.76313	1.83547	1.96052	1.04512	5.04536	5.6	11.2693	-90.77	10.8804	-0.689867	-86.2727	-3.37	-0.572471	-0.0615857	0	-0.571075	-0.572471	0	3.31075	-198.121	1.61261	15.8698	89.69	151.716	7.419	0.344078	-2.23353	-1.18023	0	0	-0.450772	0.0993917	9.93917	0	0
Netherlands	2015	0	0	1.5613	1.90689	1.7877	1.82863	1.83337	0.91254	5.01942	5.8	12.4231	-90.21	10.8355	-0.442607	-76.4636	-3.38	-0.341319	-0.0567419	0	-0.722326	-0.341319	0	3.3126	-206.084	2.12061	48.5011	90.173	160.326	6.872	0.888433	-2.49392	-1.32401	0	0	-0.444962	0.101217	10.1217	0	0
Netherlands	2016	0	0	1.54081	1.84565	1.96485	1.82029	1.85835	0.896933	4.98285	5.6	12.8331	-91.06	10.8631	-0.251209	-72.94	-3.37	-0.195598	-0.0556363	0	-0.744206	-0.195598	0	3.33002	-207.85	2.42429	34.5678	90.635	150.966	6.007	0.565544	-3.09633	-1.65664	0	0	-0.450275	0.0995477	9.95477	0	0
Netherlands	2017	0	0	1.4962	1.75831	2.04049	1.81402	1.74558	0.907124	5.0369	6.4	14.8804	-90.79	10.891	-0.283565	-71.9655	-3.3	-0.215336	-0.0544624	0	-0.707047	-0.215336	0	3.30953	-203.109	2.78155	23.5202	91.077	159.646	4.837	1.43933	-2.98814	-1.5969	0	0	-0.448446	0.100122	10.0122	0	0
Netherlands	2018	0	0	1.49981	1.74447	2.01364	1.80974	1.88915	0.838281	5.45533	7.4	16.5281	-89.23	10.9186	-0.355104	-73.5473	-3.16	-0.32073	-0.0538774	0	-0.65123	-0.32073	0	3.31448	-196.943	2.25874	-30.7775	91.49	163.559	3.832	2.5334	-3.00234	-1.60474	0	0	-0.44731	0.100479	10.0479	0	0
Netherlands	2019	0	0	1.48359	1.73474	1.84917	1.76715	1.86761	0.821325	6.19833	8.6	18.7758	-89.64	10.9465	-0.218267	-76.3945	-3.03	-0.201138	-0.0545274	0	-0.669253	-0.201138	0	3.35046	-191.259	2.30009	-13.674	91.876	160.677	3.379	3.02788	-2.99799	-1.60234	0	0	-0.457985	0.0971264	9.71264	0	0
Netherlands	2020	0	1	1.52001	1.70633	1.74825	1.80522	1.99998	0.830933	7.31661	10.7	26.5576	-87.77	10.9742	-0.083744	-75.5091	-3.05	-0.0724657	-0.0561905	0	-0.658294	-0.0724657	0	3.13499	-174.316	-3.86795	-23.7095	92.236	152.233	3.82	2.35573	-3.15885	-1.69116	0	1	-0.449398	0.0998232	9.98232	0	0
New Zealand	2002	1	0	1.50104	1.79115	1.56194	1.67845	2.26257	1.32036	6.68547	26.6	69.7773	-70.09	37.4083	-1.742	-1.19196	-5.35	-0.765252	-0.0310368	0	-1.00459	-0.723411	-0.0418419	1.76065	-59.0731	4.71348	4.27533	86.161	62.656	5.282	0.298406	-0.0684168	0.015261	1	0	-0.0426392	0.227573	22.7573	0	0
New Zealand	2003	1	0	1.61012	1.84833	1.65079	1.76194	2.28463	1.18837	6.64853	25.9	66.2612	-70.45	37.4074	-1.25652	-1.2692	-5.05	-0.449756	-0.0282431	0	-0.834939	-0.421365	-0.0283911	1.7627	-59.461	4.72804	-3.81179	86.221	57.9148	4.745	2.06932	-0.064536	0.0174039	1	0	-0.0855079	0.214109	21.4109	0	0
New Zealand	2004	1	0	1.65318	1.84883	1.75324	1.94005	2.35214	1.50003	7.04096	28.2	72.5402	-68.62	37.4065	-1.09975	-1.34644	-4.94	-0.517205	-0.0271605	0	-0.738926	-0.486652	-0.030553	1.69069	-59.5202	4.08796	2.23263	86.281	58.7996	4.005	2.75901	-0.165603	-0.0384013	1	0	-0.0808753	0.215564	21.5564	0	0
New Zealand	2005	1	0	1.6286	1.8464	1.63162	1.74136	2.19131	1.25225	7.22985	26.8	64.6347	-68.66	37.4056	-1.23603	-1.42368	-4.66	-0.550012	-0.0258409	0	-0.742164	-0.51736	-0.0326527	1.71236	-61.7047	3.35293	1.66202	86.341	58.0187	3.807	2.00058	-0.233086	-0.0756633	1	0	-0.0972862	0.21041	21.041	0	0
New Zealand	2006	0	0	1.49937	1.79479	1.69532	1.5834	2.32255	1.25449	7.26206	27	65.0022	-68.04	37.4048	-1.29268	-1.50092	-4.54	-0.584573	-0.02568	0	-0.807725	-0.506875	-0.0776985	1.72119	-64.3086	2.77978	2.61133	86.4	59.6033	3.857	2.70963	0.093205	0.104503	0	0	-0.0963921	0.210691	21.0691	0	0
New Zealand	2007	0	0	1.47795	1.82682	1.71599	1.65778	2.31768	1.24337	7.14253	27	65.76	-67.81	37.4039	-1.37347	-1.52332	-4.45	-0.740866	-0.02628	0	-0.672517	-0.729038	-0.0118277	1.72183	-64.6644	3.05642	3.16024	86.34	58.4252	3.661	5.30959	0.164067	0.14363	0	0	-0.0950399	0.211115	21.1115	0	0
New Zealand	2008	0	1	1.47839	1.85066	1.79991	1.66906	2.29753	1.16264	6.59026	26.1	64.5132	-67.31	37.403	-2.36269	-1.54572	-4.52	-1.40204	-0.0267408	0	-0.742718	-1.33864	-0.0633964	1.72566	-56.6668	-1.01704	1.94246	86.28	64.2611	4.167	2.74201	0.730803	0.45656	0	1	-0.0506293	0.225063	22.5063	0	0
New Zealand	2009	0	1	1.47848	1.92267	1.82374	1.84808	2.38032	1.07116	6.23751	28.5	71.9282	-64.58	37.4021	-1.74759	-1.56812	-4.6	-0.874658	-0.0264752	0	-0.739561	-0.783652	-0.0910064	1.67227	-55.6531	-0.0374661	-0.0430577	86.22	55.0144	6.121	2.63536	0.219326	0.174142	0	1	-0.0669582	0.219935	21.9935	0	0
New Zealand	2010	0	0	1.50751	1.86189	1.81237	1.81132	2.3294	1.23649	6.51212	29.4	73.3982	-62.23	37.4012	-2.12244	-1.59052	-4.68	-1.0574	-0.0270266	0	-0.63731	-0.905379	-0.152022	1.71009	-55.0345	1.45864	0.194915	86.16	58.1047	6.557	3.15973	0.136128	0.128203	0	0	-0.0513169	0.224847	22.4847	0	0
New Zealand	2011	0	0	1.57908	1.89465	1.96411	1.87171	2.29087	1.37673	6.53216	30.3	76.3192	-60.59	37.4001	-2.19427	-1.94786	-4.6	-1.06824	-0.0265883	0	-0.562358	-0.936958	-0.131285	1.70914	-54.3107	2.0935	0.818121	86.1	59.1724	6.491	2.4727	0.0517089	0.08159	0	0	-0.050076	0.225237	22.5237	0	0
New Zealand	2012	0	0	1.61772	1.88321	1.8448	1.79215	2.30789	1.36137	6.24217	28.8	72.2062	-63.1	37.3989	-1.68351	-2.3052	-4.73	-0.848619	-0.0253371	0	-0.590778	-0.779015	-0.0696043	1.70479	-59.8582	2.36631	2.17879	86.161	56.9088	6.931	-0.178925	0.257621	0.195287	0	0	-0.0687263	0.21938	21.938	0	0
New Zealand	2013	0	0	1.60602	1.87014	1.81914	1.74999	2.33419	1.45393	5.98287	28.3	74.6956	-61.67	37.3978	-1.52078	-2.66254	-4.68	-0.703331	-0.0243713	0	-0.562137	-0.622195	-0.0811353	1.66451	-59.0057	2.58954	-0.0363955	86.221	55.9861	5.839	4.18336	0.277203	0.206099	0	0	-0.0774575	0.216637	21.6637	0	0
New Zealand	2014	1	0	1.52433	2.00404	1.94384	1.92499	2.24941	1.46793	5.62932	29	79.5126	-60.97	37.3967	-1.42914	-3.01988	-4.74	-0.730705	-0.0236475	0	-0.557158	-0.678735	-0.0519701	1.67747	-60.3539	3.82638	1.61353	86.281	55.0987	5.428	0.447623	0.0629722	0.0878091	1	0	-0.0694783	0.219143	21.9143	0	0
New Zealand	2015	1	0	1.55502	1.96534	1.91035	1.85282	2.23321	1.51114	5.70315	29.3	80.465	-60.04	37.3955	-1.28425	-3.01988	-4.62	-0.556337	-0.0217141	0	-0.652001	-0.480779	-0.0755576	1.66595	-59.2556	3.69037	-0.0411688	86.341	54.8513	5.415	1.46397	0.158632	0.140629	1	0	-0.0777105	0.216558	21.6558	0	0
New Zealand	2016	1	0	1.53386	1.91363	2.02746	1.8059	2.23673	1.50114	5.84488	30.1	84.5663	-59.43	37.396	-1.0475	-3.01988	-4.4	-0.371663	-0.021113	0	-0.612885	-0.3338	-0.0378627	1.6982	-59.335	3.77911	1.06193	86.4	52.4062	5.147	2.42048	0.180773	0.152854	1	0	-0.0923297	0.211967	21.1967	0	0
New Zealand	2017	1	0	1.55971	1.88448	2.0818	1.72796	2.19592	1.56195	5.66954	28.4	81.5166	-60.05	37.4116	-1.59354	-3.01988	-4.25	-0.379746	-0.0210678	0	-0.619607	-0.345981	-0.0337647	1.65705	-62.2876	3.37873	1.15603	86.466	54.1433	4.736	3.61462	0.0033481	0.054887	1	0	-0.0944537	0.211299	21.1299	0	0
New Zealand	2018	1	0	1.60525	1.8338	2.00086	1.62872	2.13543	1.51216	5.58649	28.9	83.6533	-59.1	37.4279	-1.58813	-3.01988	-4.04	-0.459836	-0.0211451	0	-0.620564	-0.419179	-0.0406566	1.63888	-62.3315	3.47058	1.1871	86.538	55.7665	4.335	1.76018	0.0431513	0.0768648	1	0	-0.0949542	0.211142	21.1142	0	0
New Zealand	2019	0	0	1.53761	1.84378	1.87102	1.63244	2.13093	1.41695	5.30008	28	82.025	-59.83	37.4673	-1.50328	-3.01988	-4.05	-0.435107	-0.0206788	0	-0.66627	-0.400214	-0.0348927	1.71009	-63.3744	2.31747	1.36886	86.615	54.4543	4.109	3.13993	0.0068396	0.0568148	0	0	-0.0991492	0.209825	20.9825	0	0
New Zealand	2020	0	1	1.59747	1.83839	1.87445	1.53874	2.11691	1.46835	5.20735	28.7	80.4357	-58.52	37.5701	-1.27247	-3.01988	-3.94	-0.283854	-0.0214635	0	-0.66567	-0.254601	-0.0292536	1.65447	-61.18	-0.307247	1.9411	86.699	43.9772	4.595	1.91745	-0.0286621	0.0372121	0	1	-0.111811	0.205848	20.5848	0	0
Nicaragua	2002	0	0	-0.054777	-0.677636	-0.489535	-0.877978	-0.479137	-0.0931837	43.4445	54.7	24.6095	-48.38	42.8543	-1.14158	-0.931969	-5.07	-0.0547413	-0.741214	0	-1.63043	0	-0.0547413	1.9051	-30.0759	0.753939	3.90334	55.484	58.0913	7.513	3.24838	3.83108	2.16842	0	0	-0.0159078	0.235968	23.5968	0	0
Nicaragua	2003	0	0	0.158112	-0.560249	-0.470481	-0.794633	-0.541942	-0.368299	41.6435	51.5	27.074	-48.56	41.8478	-1.12766	-0.943272	-5.13	-0.00135676	-0.718155	0	-1.86991	0	-0.00135676	1.97204	-30.818	2.52073	3.78225	55.633	62.1751	7.6	5.33108	3.72755	2.11125	0	0	-0.0124304	0.23706	23.706	0	0
Nicaragua	2004	1	0	-0.0153151	-0.788531	-0.346081	-0.842655	-0.44666	-0.341314	42.7398	51.2	27.7245	-48.36	40.8414	-1.29186	-0.954576	-5.14	-0.155316	-0.675975	0	-1.78359	0	-0.155316	1.77342	-30.7383	5.31217	4.3156	55.782	67.1953	6.41	9.0509	3.82215	2.16349	1	0	-0.0086818	0.238237	23.8238	0	0
Nicaragua	2005	1	0	-0.248995	-0.614662	-0.445305	-0.825872	-0.616481	-0.339233	42.0621	52.8	34.6113	-48.3	39.8349	-1.11398	-0.965879	-5.01	-0.100574	-0.647724	0	-1.6362	0	-0.100574	1.67731	-30.802	4.2824	3.81407	55.935	71.6457	5.37	9.86709	3.68164	2.0859	1	0	-0.0169587	0.235638	23.5638	0	0
Nicaragua	2006	1	0	-0.194359	-0.752042	-0.426474	-0.89506	-0.673504	-0.26782	42.5945	53.3	30.0517	-47.18	38.8285	-1.57912	-0.972921	-5	-0.200016	-0.59173	0	-1.70414	0	-0.200016	1.5721	-31.4061	4.15295	4.2403	56.132	87.3097	5.31	7.86791	3.57414	2.02654	1	0	-0.0095185	0.237975	23.7975	0	0
Nicaragua	2007	1	0	-0.217172	-0.788387	-0.450823	-0.953955	-0.767759	-0.120371	44.1493	52.6	29.0047	-47.74	37.822	-1.54259	-0.979963	-4.84	-0.220835	-0.55968	0	-1.67465	0	-0.220835	1.55202	-31.1793	5.07635	5.14187	56.328	93.0257	4.89	9.67391	3.59285	2.03688	1	0	-0.0200188	0.234677	23.4677	0	0
Nicaragua	2008	1	0	-0.367741	-0.808184	-0.421554	-0.917956	-0.76893	-0.222543	43.5712	53.8	35.5376	-45.5	36.8156	-1.48191	-0.987005	-4.69	-0.247945	-0.540391	0	-1.45897	-0.189577	-0.0583683	1.32616	-30.5754	3.43572	7.38263	56.525	96.794	6.2	16.1992	3.55015	2.01329	1	0	-0.0219913	0.234057	23.4057	0	0
Nicaragua	2009	0	1	-0.439286	-0.786914	-0.435356	-0.961996	-0.727106	-0.305794	43.2861	54.6	30.9241	-46.91	35.8091	-1.31162	-0.977473	-4.82	-0.174109	-0.545799	0	-1.50632	-0.107563	-0.0665457	1.36018	-30.1757	-3.29267	5.22853	56.721	86.9936	8.16	6.0363	3.59462	2.03785	0	1	-0.0303912	0.231419	23.1419	0	0
Nicaragua	2010	1	0	-0.477622	-0.837367	-0.302378	-0.949313	-0.75583	-0.499709	43.9949	54.4	36.9855	-45.65	34.8026	-4.15315	-0.967942	-4.73	-0.987036	-0.498812	0	-1.51376	-0.0201511	-0.966884	1.45379	-30.1194	4.4101	5.59336	56.917	100.364	7.83	6.13809	3.60597	2.04412	1	0	0.0300831	0.250412	25.0412	0	0
Nicaragua	2011	1	0	-0.57673	-0.725576	-0.353553	-0.893716	-0.73797	-0.269736	42.5639	53.3	33.9859	-48.11	34.3363	-5.12065	-0.95841	-4.53	-1.94726	-0.468934	0	-1.49682	-0.0453038	-1.90195	1.24154	-30.6673	6.31669	9.57917	57.113	111.827	6.618	10.2148	3.77569	2.13784	1	0	0.0523589	0.257408	25.7408	0	0
Nicaragua	2012	1	0	-0.53634	-0.733912	-0.310052	-0.891339	-0.781678	-0.348778	41.4447	53.3	42.7231	-43.14	33.8699	-4.62547	-0.940477	-4.61	-1.62688	-0.441744	0	-1.44045	-0.0410032	-1.58588	1.23649	-30.6941	6.49614	7.36516	57.309	115.177	5.208	6.24336	3.83882	2.17269	1	0	0.0495795	0.256535	25.6535	0	0
Nicaragua	2013	1	0	-0.457735	-0.674327	-0.308052	-0.813366	-0.738524	-0.249216	41.0282	54.3	52.3359	-39.42	33.4035	-4.95048	-0.922543	-4.53	-1.30281	-0.420794	0	-1.38288	-0.0361636	-1.26665	1.26998	-30.2862	4.92709	8.78723	57.505	110.984	5.28	4.34916	3.75368	2.12568	1	0	0.05386	0.25788	25.788	0	0
Nicaragua	2014	1	0	-0.395806	-0.714166	-0.408892	-0.837823	-0.887542	-0.0407801	40.8744	53	54.5342	-40.2	32.9371	-4.22118	-0.904609	-4.46	-0.628865	-0.400251	0	-1.4019	-0.0301292	-0.598736	1.29015	-30.5401	4.78546	9.06364	57.7	106.698	4.52	8.39274	3.7592	2.12873	1	0	0.0236818	0.248402	24.8402	0	0
Nicaragua	2015	1	0	-0.41494	-0.754738	-0.419966	-0.862328	-0.907449	-0.0921955	37.9412	50	50.1024	-43.88	32.4707	-2.1054	-0.886676	-4.5	-0.101534	-0.371346	0	-1.49378	0	-0.101534	1.28169	-31.2831	4.79227	7.58033	57.895	98.1942	4.7	7.58849	3.63545	2.0604	1	0	-0.0307266	0.231314	23.1314	0	0
Nicaragua	2016	1	0	-0.680512	-0.656879	-0.528951	-0.737571	-0.897036	-0.0954836	37.276	49.5	52.7704	-44.23	31.6398	-3.11298	-0.868742	-4.45	-0.194259	-0.368972	0	-1.52708	-0.00674553	-0.187513	1.32945	-31.5589	4.56315	7.44463	58.09	93.8137	3.9	4.58974	3.68618	2.08841	1	0	-0.0162176	0.235871	23.5871	0	0
Nicaragua	2017	1	0	-0.718134	-0.66067	-0.695782	-0.668118	-0.89563	-0.0538227	37.812	48.9	56.0517	-42.92	30.8088	-2.70296	-0.850809	-4.36	-0.0207527	-0.345693	0	-1.56832	-0.0110521	-0.00970062	1.35007	-31.6117	4.63121	7.51058	58.299	96.3806	3.3	4.12385	3.61896	2.05129	1	0	-0.0259237	0.232822	23.2822	0	0
Nicaragua	2018	0	1	-1.09992	-1.07846	-0.731357	-0.812323	-1.02401	-0.950928	38.484	51.3	58.9514	-40.92	29.9778	-2.02687	-0.832875	-4.46	-0.0770278	-0.356269	0	-1.61806	-0.0183749	-0.0586529	1.32711	-31.0792	-3.36336	6.4306	58.522	93.9847	5.2	2.65826	3.62937	2.05704	0	1	-0.022928	0.233763	23.3763	0	0
Nicaragua	2019	0	1	-1.09812	-1.20159	-0.714433	-0.777326	-1.03215	-0.992501	38.4888	50.5	57.1489	-41.71	29.1468	-1.28486	-0.814545	-4.65	-0.0516216	-0.363596	0	-1.76156	-0.0139939	-0.0376276	1.3431	-31.5633	-2.89687	3.96093	58.76	94.0422	5.472	5.39539	3.50098	1.98615	0	1	-0.0282283	0.232099	23.2099	0	0
Nicaragua	2020	0	1	-1.09782	-1.19874	-0.679826	-0.679675	-1.18035	-0.585719	38.9651	52.2	70.2187	-38.86	28.3159	-1.65813	-0.814941	-4.55	-0.046711	-0.375521	0	-1.81812	-0.00732389	-0.0393872	1.29149	-31.4645	-2.23654	5.86575	59.012	88.6381	6.201	6.28534	3.53094	2.00269	0	1	-0.0081962	0.23839	23.839	0	0
Niger	2002	1	0	-0.204168	-0.646826	-0.772763	-0.823412	-1.02049	-0.129555	84.5045	87.7	0.52356	-14.34	1.02886	-7.01295	-25.6645	-5.53	-0.023162	-6.05528	0	-0.482635	-0.0207432	-0.00241878	0.384645	-2.82855	4.91847	0.281341	16.255	30.8344	1.813	2.5723	3.7285	2.11178	1	0	-0.0928454	0.211805	21.1805	0	0
Niger	2003	0	0	-0.156031	-0.522455	-0.730029	-0.651327	-0.91642	0.0421949	83.6338	87	0.56701	-15.13	1.01906	-9.26317	-26.4773	-5.65	-0.0208842	-5.82894	0	-0.449198	-0.0201055	-0.000778706	0.419562	-3.94813	2.17061	0.545924	16.251	33.3828	2.156	-0.188481	3.8379	2.17218	0	0	-0.0579345	0.222769	22.2769	0	0
Niger	2004	0	0	-0.190245	-0.649458	-0.68377	-0.765198	-0.88732	-0.505271	82.4118	87	0.634146	-16.11	1.00925	-7.5076	-27.2901	-5.89	-0.0836056	-5.43327	0	-0.436647	-0.0686926	-0.014913	0.40286	-5.08701	0.363802	0.64916	16.247	36.9641	2.747	0.386942	4.14956	2.34427	0	0	-0.0704537	0.218837	21.8837	0	0
Niger	2005	1	0	-0.28356	-0.721391	-0.412262	-0.785669	-0.724551	-0.486011	84.2892	87.5	0.69869	-14.02	0.999447	-7.20852	-28.1029	-5.54	-0.184709	-5.33007	0	-0.379651	-0.0359175	-0.148792	0.326002	-6.12868	7.33187	1.13507	16.242	38.3477	3.1	8.58488	3.81507	2.15958	1	0	-0.082129	0.21517	21.517	0	0
Niger	2006	1	0	-0.324553	-0.601572	-0.553186	-0.825251	-0.848923	-0.227475	84.3563	87.4	0.825688	-13.92	0.989642	-6.8946	-29.7787	-5.38	-0.236135	-5.00133	0	-0.36409	-0.0349292	-0.201206	0.306298	-7.16216	5.93105	0.847498	16.238	36.5314	2.536	1.4962	3.74907	2.12313	1	0	-0.0890282	0.213003	21.3003	0	0
Niger	2007	0	0	-0.368081	-0.613012	-0.557963	-0.800147	-0.761083	-0.459753	83.5113	86.2	0.803571	-14.41	0.979837	-8.30058	-31.4546	-5.45	-0.288662	-4.77012	0	-0.348057	-0.0401268	-0.248535	0.319766	-8.34074	3.14272	1.72859	16.234	35.5028	2.032	7.03666	3.79097	2.14627	0	0	-0.0670545	0.219905	21.9905	0	0
Niger	2008	1	0	-0.441894	-0.680911	-0.464942	-0.734765	-0.730394	-0.670321	82.4754	86.1	0.877193	-15.48	0.970032	-7.94564	-33.1305	-5.3	-0.239967	-4.11128	0	-0.299998	-0.0729699	-0.166997	0.257158	-9.55521	7.73141	3.87903	16.229	39.7112	1.592	10.1291	3.80572	2.15442	1	0	-0.0748265	0.217464	21.7464	0	0
Niger	2009	0	0	-0.737894	-0.49186	-0.525119	-0.705006	-0.611199	-1.15004	80.2805	83.2	0.77821	-17.49	0.960227	-7.9622	-34.8063	-5.51	-0.198066	-3.89739	0	-0.38456	-0.0253686	-0.172698	0.314764	-10.9382	1.9626	8.62089	16.225	49.5123	1.209	4.19006	3.92634	2.22102	0	0	-0.07272	0.218125	21.8125	0	0
Niger	2010	1	0	-0.666964	-0.499165	-0.564631	-0.703781	-0.658249	-1.16074	76.7301	80.7	1.16041	-21.14	0.950422	-6.88472	-36.4822	-5.47	-0.276245	-3.38055	0	-0.472642	-0.0622107	-0.214035	0.363783	-11.083	8.57817	10.1467	16.221	51.946	0.722	3.47504	3.93913	2.22808	1	0	-0.0889315	0.213034	21.3034	0	0
Niger	2011	0	0	-0.246729	-0.407698	-0.567633	-0.652889	-0.652858	-0.878004	72.9969	77.2	1.43275	-24.31	0.940617	-8.14771	-38.1581	-4.65	-0.900416	-3.19038	0	-0.450914	-0.575061	-0.325356	0.369889	-12.2325	2.35776	12.1645	16.216	50.2464	0.316	3.97161	4.13215	2.33466	0	0	-0.0864818	0.213803	21.3803	0	0
Niger	2012	1	0	-0.284628	-0.663967	-0.60925	-0.695408	-0.647686	-1.14813	67.5203	72.7	1.62907	-30.09	0.930812	-10.3335	-39.834	-4.97	-1.47748	-2.88899	0	-0.602492	-1.22234	-0.25514	0.45588	-14.3555	10.5489	8.92368	16.212	45.086	2.177	5.30834	4.04992	2.28925	1	0	-0.025831	0.232851	23.2852	0	0
Niger	2013	1	0	-0.306367	-0.666362	-0.582843	-0.732347	-0.619116	-1.3218	71.4887	78.7	1.85102	-26.7	0.921007	-11.4669	-41.5098	-5.9	-2.9461	-2.72921	0	-0.599272	-2.8379	-0.108199	0.333687	-16.0666	5.31513	7.03517	16.208	46.2951	1.397	-0.369174	4.05734	2.29335	1	0	0.10615	0.274303	27.4303	0	0
Niger	2014	1	0	-0.194639	-0.650923	-0.743807	-0.713479	-0.695517	-1.17584	73.0485	78.1	2.21219	-24.79	0.911202	-10.2731	-43.1857	-5.63	-1.83936	-2.60271	0	-0.63773	-1.78651	-0.0528488	0.27641	-17.7204	6.64214	7.57591	16.219	45.7416	0.524	-0.405677	4.19248	2.36797	1	0	0.0375303	0.252751	25.2751	0	0
Niger	2015	1	0	-0.204435	-0.593085	-0.780474	-0.722631	-0.674529	-1.0597	74.6142	78.9	2.14689	-23.11	0.901397	-9.74016	-49.1857	-5.49	-0.608562	-2.59073	0	-0.722014	-0.534779	-0.0737823	0.387402	-19.1275	4.39265	5.46762	16.247	44.7274	0.553	2.24943	4.15135	2.34526	1	0	-0.0286921	0.231953	23.1953	0	0
Niger	2016	1	0	-0.42236	-0.685058	-0.720743	-0.694123	-0.66605	-1.10076	75.0039	80.2	1.89033	-22.79	0.891592	-9.68635	-49.92	-5.34	-0.676007	-2.64882	0	-0.705879	-0.602444	-0.0735625	0.251899	-20.8373	5.74089	2.89774	16.29	36.4881	0.548	1.79272	4.15242	2.34585	1	0	-0.0309766	0.231235	23.1235	0	0
Niger	2017	1	0	-0.430776	-0.704614	-0.725769	-0.754679	-0.687656	-1.25951	77.1395	82	2.63345	-20.47	0.881787	-9.37929	-45.1797	-5.14	-0.830849	-2.65626	0	-0.616077	-0.77576	-0.055089	0.212196	-22.4133	5.00536	3.02823	16.35	39.0711	0.554	0.368277	4.15147	2.34532	1	0	-0.0264085	0.23267	23.267	0	0
Niger	2018	1	0	-0.599332	-0.605222	-0.682929	-0.827707	-0.592983	-1.35828	76.5296	82	8.59888	-20.8	0.871982	-6.7961	-69.4717	-5.05	-1.06164	-2.5109	0	-0.569884	-0.739769	-0.321873	0.30702	-24.3517	7.21142	3.63037	16.425	37.5388	0.535	2.40369	4.01793	2.27159	1	0	-0.0846834	0.214368	21.4368	0	0
Niger	2019	1	0	-0.582243	-0.552526	-0.724169	-0.840266	-0.567891	-1.40501	75.8603	80.7	6.8791	-21.4	0.862177	-5.81264	-73.8088	-4.99	-0.507031	-2.42993	0	-0.650442	-0.43913	-0.0679005	0.254906	-26.4848	5.93985	5.56379	16.517	37.1026	0.531	-0.0243828	3.88708	2.19934	1	0	-0.124651	0.201816	20.1815	0	0
Niger	2020	1	0	-0.494895	-0.573562	-0.798239	-0.660879	-0.662675	-1.66721	76.6037	81.9	6.84844	-20.62	0.852372	-5.56826	-73.8088	-4.97	-0.345221	-2.59951	0	-0.702124	-0.184341	-0.16088	0.27	-28.1538	3.55064	2.62396	16.626	35.513	0.594	1.16298	3.88693	2.19926	1	0	-0.135076	0.198541	19.8541	0	0
Norway	2002	0	0	1.48717	1.84875	1.22071	1.83372	2.11497	1.60835	5.12829	59.5	99.5886	-53.53	33.1581	-8.80703	-0.668598	-3.98	-7.31988	-0.0366787	0	-0.353289	-7.31977	-0.000104798	3.03495	-34.7031	1.37756	1.53728	76.733	67.517	4.022	-1.52021	-1.99217	-1.04697	0	0	0.32362	0.342602	34.2602	0	0
Norway	2003	0	0	1.52925	1.8811	1.30757	1.83412	2.01097	1.20456	5.00632	56.2	99.4083	-58.88	33.1551	-8.67852	-0.675041	-4.28	-7.04022	-0.0324327	0	-0.339348	-7.04018	-4.41784e-05	2.98868	-36.8719	0.944909	1.82199	77.084	66.3208	4.221	2.86082	-1.93974	-1.01801	0	0	0.311313	0.338737	33.8737	0	0
Norway	2004	1	0	1.70421	1.96196	1.43924	2.05889	1.91286	1.19662	4.54906	56.9	99.3593	-59.16	33.1521	-9.49868	-0.735411	-4.35	-7.89029	-0.0282117	0	-0.31085	-7.89022	-7.30995e-05	2.98688	-37.8821	4.01459	1.85416	77.399	68.672	4.256	5.85021	-2.02964	-1.06765	1	0	0.361255	0.354422	35.4422	0	0
Norway	2005	0	0	1.64059	1.91248	1.4785	1.85913	2.00025	1.29528	4.71294	58.6	99.4792	-58.64	33.1491	-10.4924	-0.717064	-4.32	-8.59341	-0.0257062	0	-0.270826	-8.59295	-0.000462383	2.82473	-37.8806	2.68512	3.24499	77.675	70.4695	4.381	8.763	-2.16756	-1.14381	0	0	0.40756	0.368965	36.8965	0	0
Norway	2006	0	0	1.54218	1.96577	1.22095	1.87562	2.12355	1.25271	4.61342	57	99.324	-59.98	33.1461	-10.8945	-0.769372	-4.25	-8.87778	-0.0249857	0	-0.263785	-8.87681	-0.000970306	2.79057	-36.7933	2.46147	3.42387	77.95	71.6599	3.397	8.73219	-2.22	-1.17276	0	0	0.419654	0.372763	37.2763	0	0
Norway	2007	0	0	1.54985	1.92829	1.32977	2.01804	1.98258	1.14555	4.89915	57.4	99.1465	-56.17	33.143	-9.56163	-0.792147	-3.88	-7.76015	-0.0240729	0	-0.243213	-7.75869	-0.00146086	2.7784	-37.9618	2.91404	6.16081	78.234	71.942	2.493	3.07766	-2.26158	-1.19572	0	0	0.342347	0.348484	34.8484	0	0
Norway	2008	0	0	1.54804	1.95779	1.3729	1.83281	1.89188	1.28543	4.77013	58.5	99.4121	-59.6	33.14	-12.6177	-0.768128	-4.27	-10.302	-0.0234255	0	-0.215013	-10.2987	-0.00331946	2.5305	-38.2837	0.48192	4.42621	78.526	74.7853	2.521	10.5664	-2.35146	-1.24535	0	0	0.509554	0.400998	40.0998	0	0
Norway	2009	0	1	1.54888	1.8735	1.46495	1.83761	1.98498	1.27653	4.78338	56.7	96.597	-61.41	33.137	-8.36533	-0.74411	-4.26	-6.6585	-0.023516	0	-0.266154	-6.65754	-0.000966798	2.56022	-31.7797	-1.94036	2.22585	78.815	67.4643	3.1	-5.11594	-2.41896	-1.28262	0	1	0.285456	0.330616	33.0616	0	0
Norway	2010	0	0	1.59509	1.88988	1.51198	1.87354	2.07725	1.33231	5.49006	56	95.7593	-60.24	33.134	-7.66161	-0.73445	-4.46	-6.01921	-0.0225625	0	-0.273051	-6.0124	-0.00680835	2.58111	-38.3013	0.787052	5.01894	79.102	68.2395	3.527	5.95536	-2.48196	-1.31741	0	0	0.255392	0.321174	32.1174	0	0
Norway	2011	0	0	1.62636	1.86418	1.60297	1.83171	2.14263	1.33798	6.49858	56	96.585	-55.99	33.1554	-10.0324	-0.724764	-3.81	-7.8957	-0.0217973	0	-0.234803	-7.88732	-0.00837415	2.4196	-35.4566	1.10566	2.05368	79.455	69.5987	3.196	6.67279	-2.371	-1.25614	0	0	0.353039	0.351842	35.1842	0	0
Norway	2012	0	0	1.72816	1.95103	1.53974	1.89994	2.24798	1.32747	5.97665	56.9	97.9887	-56.9	33.1767	-9.34171	-0.715105	-3.96	-7.21278	-0.0199869	0	-0.23274	-7.20582	-0.00696524	2.26762	-37.4873	2.71796	5.44056	79.874	68.4986	3.129	3.35309	-2.38581	-1.26432	0	0	0.321621	0.341975	34.1975	0	0
Norway	2013	0	0	1.7379	1.97096	1.65741	1.87677	2.28693	1.35209	5.33133	56.6	97.6982	-59.38	33.2091	-8.16855	-0.72089	-4.14	-6.23368	-0.0185316	0	-0.241676	-6.22654	-0.00714583	2.26655	-37.7045	1.01619	-0.260184	80.286	67.9728	3.425	2.55324	-2.22705	-1.17665	0	0	0.265718	0.324417	32.4417	0	0
Norway	2014	0	0	1.684	2.02431	1.64058	1.8217	2.22268	1.11996	4.92725	55.8	97.6733	-57.72	33.2318	-7.51745	-0.727427	-3.75	-5.74188	-0.0161676	0	-0.256113	-5.73737	-0.0045192	2.25778	-41.3407	2.04813	0.646204	80.692	69.1374	3.486	0.258333	-2.25102	-1.18989	0	0	0.222163	0.310738	31.0738	0	0
Norway	2015	0	0	1.68808	1.97525	1.59465	1.83307	2.20029	1.14562	5.94577	56.5	97.7069	-51.53	33.2456	-5.1624	-0.710296	-3.31	-3.77785	-0.0149871	0	-0.341728	-3.77589	-0.00196384	2.2867	-47.2299	1.85734	1.87399	81.091	70.4319	4.296	-2.80447	-2.3246	-1.23052	0	0	0.0988629	0.272014	27.2014	0	0
Norway	2016	0	0	1.66545	1.99446	1.68635	1.83237	2.1495	1.18162	5.88515	57.7	97.818	-54.4	33.2711	-3.86709	-0.693165	-3.6	-2.88451	-0.0136982	0	-0.361575	-2.88451	0	2.34834	-46.6233	1.16472	-5.03255	81.485	69.1168	4.68	-1.5981	-2.3945	-1.26911	0	0	0.0510798	0.257007	25.7007	0	0
Norway	2017	0	0	1.69478	1.98069	1.80553	1.94445	2.19125	1.1507	6.35653	58.9	97.8493	-55.91	33.2945	-5.3359	-0.704353	-3.74	-4.01726	-0.0122881	0	-0.341713	-4.01726	0	2.23162	-47.4455	2.46375	1.46874	81.871	69.1088	4.164	4.08095	-2.44579	-1.29744	0	0	0.127091	0.280879	28.0879	0	0
Norway	2018	0	0	1.70935	1.92208	1.78419	1.84515	2.05031	1.12085	6.30297	58.9	97.7968	-54.5	33.3173	-7.39362	-0.703783	-3.65	-5.42299	-0.0125941	0	-0.324807	-5.42299	0	2.12744	-46.2807	0.828932	-1.28796	82.248	70.0032	3.801	6.74292	-3.32371	-1.78219	0	0	0.215816	0.308745	30.8745	0	0
Norway	2019	0	0	1.65354	1.94084	1.79789	1.82773	2.03375	1.14211	7.13765	59.8	97.7822	-52.11	33.3399	-6.2689	-0.703263	-3.43	-4.58125	-0.0128326	0	-0.351208	-4.58125	0	2.02838	-42.6479	1.12375	3.99513	82.616	70.8958	3.684	-0.548437	-3.37514	-1.81059	0	0	0.161393	0.291652	29.1652	0	0
Norway	2020	0	1	1.72023	1.92992	1.69427	1.88777	2.06577	1.22161	7.02725	60.9	98.4305	-51.78	33.4354	-4.18129	-0.702703	-3.44	-3.181	-0.0129629	0	-0.389566	-3.181	0	1.95437	-37.5169	-1.27817	-0.892552	82.974	65.354	4.424	-2.51726	-3.20056	-1.71419	0	1	0.0756237	0.264715	26.4715	0	0
Pakistan	2002	0	0	-1.10901	-0.931637	-0.877514	-0.549481	-0.955986	-1.63768	38.784	51.4	28.937	-57.62	5.74377	-2.20001	-318.385	-4.93	-1.61665	-3.51507	-0.185497	-2.658	-1.43113	-1.70205e-05	0	-315.723	2.59482	0.843517	33.38	23.129	0.635	3.92138	-2.4008	-1.2726	0	0	-0.388012	0.119103	11.9103	0	0
Pakistan	2003	1	0	-1.17076	-0.920625	-0.82737	-0.58646	-0.804457	-1.54905	37.9228	50.1	32.4353	-58.04	5.6896	-2.1853	-320.704	-4.91	-1.61912	-3.20064	-0.149719	-2.47932	-1.46804	-0.00135457	0	-327.673	5.40131	0.475208	33.58	24.6502	0.63	3.55266	-2.10785	-1.11084	1	0	-0.39358	0.117354	11.7354	0	0
Pakistan	2004	1	0	-1.14213	-0.994449	-1.04911	-0.543261	-1.17881	-1.58288	36.1829	47.9	32.608	-59.83	5.63544	-2.44902	-323.024	-4.89	-1.81378	-2.91376	-0.0871777	-2.48	-1.7169	-0.0096981	0	-347.948	7.83126	0.845586	33.781	24.8083	0.608	7.25134	-2.43023	-1.28884	1	0	-0.386711	0.119511	11.9511	0	0
Pakistan	2005	1	0	-0.976286	-0.890321	-0.64112	-0.457726	-1.06205	-1.75139	35.7312	48	31.4504	-59.94	5.58128	-2.89117	-325.343	-4.68	-2.1552	-2.65492	-0.0831389	-2.40573	-2.05762	-0.014445	0	-356.544	7.27657	1.51575	33.982	29.8785	0.585	5.55608	-2.30392	-1.2191	1	0	-0.376937	0.122581	12.2581	0	0
Pakistan	2006	1	0	-0.886475	-0.857248	-0.479762	-0.383815	-0.818344	-2.02468	35.0004	47	33.1096	-60.79	5.52711	-2.74228	-328.077	-4.63	-2.02452	-2.56639	-0.0798664	-2.41381	-1.91071	-0.0339466	0	-378.464	6.05164	2.63975	34.184	33.0497	0.582	5.99764	-2.29748	-1.21555	1	0	-0.388829	0.118846	11.8846	0	0
Pakistan	2007	1	0	-0.949874	-0.887545	-0.537264	-0.489427	-0.818873	-2.43271	33.8125	44.9	33.1226	-62.29	5.47295	-2.23057	-330.811	-4.66	-1.61555	-2.50096	-0.0824459	-2.5313	-1.50141	-0.0316896	0	-400.625	4.44481	3.03572	34.387	30.7879	0.398	10.3313	-2.37573	-1.25875	1	0	-0.414599	0.110753	11.0753	0	0
Pakistan	2008	0	0	-0.838403	-0.972614	-0.599022	-0.738211	-0.899149	-2.57301	35.1332	46.6	32.8067	-61.46	5.41879	-2.30186	-333.636	-4.39	-1.63364	-2.55091	-0.0302066	-2.2962	-1.57752	-0.0259127	0	-403.598	2.12044	2.68937	34.59	34.349	0.423	10.9205	-2.44087	-1.29472	0	0	-0.432225	0.105217	10.5217	0	0
Pakistan	2009	1	0	-0.855764	-0.838977	-0.584045	-0.8123	-1.07563	-2.64453	35.3924	46.4	31.0909	-60.82	5.36463	-1.83965	-332.891	-4.41	-1.26791	-2.50158	0	-2.44794	-1.2513	-0.0166122	0	-413.957	3.47255	1.24801	34.793	33.3269	0.535	12.3746	-2.66022	-1.41583	1	0	-0.447333	0.100472	10.0472	0	0
Pakistan	2010	0	0	-0.798651	-0.737806	-0.613358	-0.775663	-1.08961	-2.67593	35.6395	47.4	33.4423	-60.09	5.31046	-2.27973	-336.873	-4.37	-1.49646	-2.45094	0	-2.31113	-1.46522	-0.0312368	0	-405.772	1.50172	1.02791	34.997	31.989	0.653	10.5886	-2.67465	-1.4238	0	0	-0.437989	0.103406	10.3406	0	0
Pakistan	2011	0	0	-0.829199	-0.906628	-0.647817	-0.833723	-1.08339	-2.81004	36.1405	46.8	33.4493	-59.39	5.26866	-2.61576	-326.327	-4.27	-1.79671	-2.32813	0	-2.00725	-1.76272	-0.033986	0.36242	-414.541	2.68012	0.575055	35.202	32.3626	0.796	16.411	-2.30024	-1.21707	0	0	-0.425418	0.107355	10.7355	0	0
Pakistan	2012	0	0	-0.843582	-0.88342	-0.722233	-0.783729	-1.06879	-2.677	36.3849	47.2	32.1826	-59.27	5.22686	-2.56305	-341.6	-4.19	-1.87831	-2.248	0	-2.02054	-1.85495	-0.023368	0.847534	-417.788	3.02758	0.343453	35.408	31.319	3.667	9.91832	-2.58528	-1.37445	0	0	-0.445651	0.101	10.1	0	0
Pakistan	2013	1	0	-0.799566	-0.856187	-0.705005	-0.798745	-0.962786	-2.6033	36.1767	48.1	31.8113	-59.17	5.18505	-2.14619	-333.636	-4.13	-1.6319	-2.24614	0	-2.07491	-1.61867	-0.0132354	0.756507	-433.893	4.36687	0.515354	35.613	30.8903	2.954	7.38311	-2.66195	-1.41679	1	0	-0.451463	0.0991748	9.91748	0	0
Pakistan	2014	1	0	-0.716101	-0.751136	-0.688541	-0.762601	-0.839295	-2.40128	35.1537	47.2	32.571	-60.1	5.14325	-1.99535	-354.309	-4.17	-1.4803	-2.22268	0	-2.16025	-1.47105	-0.00925123	0.823259	-450.573	4.11643	0.695308	35.819	29.4698	1.827	7.20977	-2.64526	-1.40758	1	0	-0.48009	0.090184	9.0184	0	0
Pakistan	2015	1	0	-0.722121	-0.777005	-0.645115	-0.709553	-0.834523	-2.47188	34.7544	45.9	33.1301	-60.72	5.10144	-1.22523	-358	-4.13	-0.844092	-2.27734	0	-2.14593	-0.838838	-0.00525392	0.922872	-461.296	4.21794	0.557734	36.026	26.6882	3.566	4.44198	-2.58774	-1.37582	1	0	-0.52799	0.07514	7.514	0	0
Pakistan	2016	1	0	-0.699556	-0.81552	-0.662416	-0.700058	-0.900909	-2.47387	32.9453	43.7	30.7023	-62.17	5.01795	-0.965331	-363.218	-4.17	-0.628567	-2.33956	0	-2.10972	-0.621986	-0.00658153	0.927089	-492.469	6.57384	0.82135	36.234	24.7016	2.285	0.922163	-2.69866	-1.43706	1	0	-0.555078	0.0666326	6.66326	0	0
Pakistan	2017	1	0	-0.693546	-0.731694	-0.612371	-0.634696	-0.802612	-2.39691	31.3336	42.1	27.6855	-63.49	4.99419	-1.10681	-363.582	-4.17	-0.774957	-2.35016	0	-2.22616	-0.760673	-0.0142843	0.687729	-516.955	4.43263	0.735837	36.442	25.472	3.215	4.02975	-2.81774	-1.50281	1	0	-0.547557	0.0689948	6.89948	0	0
Pakistan	2018	1	0	-0.814274	-0.68365	-0.667998	-0.666645	-0.801857	-2.25401	30.5313	43.4	28.8701	-64.32	4.94056	-1.24124	-350.436	-4.02	-0.96267	-2.29111	-0.0329278	-2.0926	-0.910693	-0.0190487	0.667641	-513.211	6.1517	0.487746	36.666	27.6261	4.083	3.84179	-2.86358	-1.52812	1	0	-0.531959	0.0738937	7.38937	0	0
Pakistan	2019	0	0	-0.862778	-0.688401	-0.687235	-0.718214	-0.879992	-2.25174	30.7164	45.9	31.7635	-63.2	4.88693	-1.3034	-322.018	-3.83	-1.01691	-2.36724	-0.0825383	-2.46472	-0.913738	-0.0206353	0.768542	-517.243	2.49764	0.696146	36.907	28.9056	4.83	9.03633	-2.86777	-1.53044	0	0	-0.48396	0.0889686	8.89686	0	0
Pakistan	2020	0	1	-0.877738	-0.712938	-0.764766	-0.571129	-0.857438	-1.79269	28.4101	42.7	32.2404	-66.28	4.83331	-1.12387	-344.709	-4.17	-0.883726	-2.47997	-0.147323	-2.68915	-0.725185	-0.0112183	1.04522	-554.088	-1.27409	0.684695	37.165	26.7163	6.127	9.9445	-2.94434	-1.57272	0	1	-0.506861	0.081776	8.17759	0	0
Panama	2002	0	0	0.619424	-0.0883368	0.520487	-0.0281212	-0.335231	0.345928	12.8144	28.7	67.4087	-75.42	59.4473	-0.123117	0	-2.21	-0.0180968	-0.172576	0	-0.856991	0	-0.0180968	0.99702	12.5974	2.50884	1.93034	62.794	126.024	6.362	1.91507	3.71131	2.10229	0	0	-0.140007	0.196993	19.6993	0	0
Panama	2003	1	0	0.484827	-0.140505	0.337754	-0.112612	-0.395565	0.0732295	12.8268	27.4	54.1099	-77.96	59.2937	-0.143856	0	-2.12	-0.0266077	-0.174559	0	-0.901814	0	-0.0266077	0.948869	12.9955	5.09686	7.72304	63.091	117.267	6.346	1.11618	3.57272	2.02576	1	0	-0.158661	0.191134	19.1134	0	0
Panama	2004	1	0	0.516072	-0.107689	0.259366	-0.0872104	-0.300812	0.0841384	12.9556	28.2	69.2859	-74.27	59.1402	-0.160148	0	-1.96	-0.0459677	-0.167141	0	-0.884517	0	-0.0459677	0.75097	13.4744	8.17565	8.4628	63.387	124.762	6.127	2.61338	3.81055	2.15708	1	0	-0.142797	0.196116	19.6116	0	0
Panama	2005	1	0	0.443538	-0.101317	0.159858	0.0693711	-0.390578	-0.157523	11.3293	22.8	67.4086	-77.3	58.9866	-0.0987196	0	-2.07	0	-0.157662	0	-1.0893	0	0	0.494529	12.1822	8.27618	6.64344	63.682	139.211	6.002	1.67574	3.76692	2.13299	1	0	-0.143274	0.195967	19.5967	0	0
Panama	2006	1	0	0.601522	-0.155253	0.313157	0.0662024	-0.363585	-0.067905	10.9718	22.1	63.1728	-78.74	58.8331	-0.127267	0	-2.02	0	-0.150599	0	-1.09071	0	0	0.536283	12.3381	9.85724	15.7789	63.976	141.473	5.822	2.1747	3.6598	2.07384	1	0	-0.152341	0.193119	19.3119	0	0
Panama	2007	1	0	0.621265	-0.174098	0.396069	0.130123	-0.339886	-0.0613481	10.9401	22.8	60.4071	-78.59	58.6795	-0.117744	0	-1.8	0	-0.136086	0	-0.961168	0	0	0.481834	13.0414	13.1531	10.2406	64.268	148.666	5.694	2.85775	3.66055	2.07426	1	0	-0.167383	0.188395	18.8395	0	0
Panama	2008	1	0	0.600691	-0.20398	0.705149	0.118166	-0.101286	-0.0977801	10.8923	23.4	65.085	-76.79	58.526	-0.109519	0	-1.57	0	-0.135622	0	-0.828438	0	0	0.395046	13.6789	10.1974	9.2919	64.56	164.586	5.647	7.47647	3.63241	2.05872	1	0	-0.173656	0.186425	18.6425	0	0
Panama	2009	0	0	0.591263	-0.0972685	0.396907	0.103057	-0.327104	0.0622795	9.57166	20.4	59.1835	-79.73	58.3724	-0.144702	0	-1.71	-0.0356352	-0.134492	0	-0.936053	0	-0.0356352	0.46025	12.815	1.61186	3.90591	64.851	137.046	5.864	6.33341	3.67738	2.08355	0	0	-0.177703	0.185154	18.5154	0	0
Panama	2010	1	0	0.537199	-0.0802931	0.472237	0.131257	-0.358153	-0.116048	9.00698	20.6	59.716	-80.43	58.2189	-0.23472	-0.759151	-1.79	-0.0520117	-0.131193	0	-0.968094	0	-0.0520117	0.319268	12.8514	6.07339	8.43207	65.14	145.449	5.845	2.5507	3.80707	2.15516	1	0	-0.172302	0.18685	18.685	0	0
Panama	2011	1	0	0.534639	0.0258786	0.534383	0.130669	-0.354333	-0.0282189	8.41274	19.7	55.153	-82.25	58.0653	-0.269869	-0.802538	-1.79	-0.113868	-0.119901	0	-0.909263	0	-0.113868	0.252569	12.4948	11.9089	12.3168	65.437	158.208	4.03	5.4877	3.86514	2.18722	1	0	-0.180525	0.184267	18.4267	0	0
Panama	2012	1	0	0.469417	-0.222084	0.468525	0.319876	-0.39512	-0.179433	8.25412	21.2	65.1877	-80.13	57.9117	-0.260441	-0.845925	-1.68	-0.125535	-0.114481	0	-0.862246	0	-0.125535	0.56204	12.7438	9.62729	8.13046	65.741	153.209	3.691	6.31829	3.98884	2.25553	1	0	-0.175718	0.185777	18.5777	0	0
Panama	2013	1	0	0.424231	-0.253414	0.447597	0.318169	-0.381226	-0.141261	9.07352	20.7	60.7996	-79.36	57.7582	-0.216898	-0.889312	-1.53	-0.0818094	-0.109522	0	-0.776095	-0.0134975	-0.0683118	0.551527	13.5517	6.32435	8.09167	66.052	133.072	3.674	6.15794	4.07649	2.30393	1	0	-0.189908	0.18132	18.132	0	0
Panama	2014	1	0	0.505584	-0.0646798	0.476987	0.277431	-0.370015	0.209008	8.50291	19.8	58.3476	-80.3	57.7756	-0.231602	-0.879283	-1.53	-0.0859613	-0.107189	0	-0.795081	-0.0258902	-0.0600711	0.600512	13.7104	4.62581	9.69217	66.371	114.971	4.391	4.69412	3.91744	2.2161	1	0	-0.194019	0.180029	18.0029	0	0
Panama	2015	1	0	0.55854	-0.140978	0.447251	0.277811	-0.434962	0.377415	7.96811	22	67.759	-78.11	57.6216	-0.13869	-0.916032	-1.45	-0.0279866	-0.095386	0	-0.734722	-0.00335805	-0.0246286	0.608842	14.4152	5.26692	9.17967	66.696	96.5792	4.335	3.01479	3.88131	2.19615	1	0	-0.189247	0.181528	18.1528	0	0
Panama	2016	1	0	0.523993	0.033684	0.468314	0.153621	-0.573966	0.400728	7.67587	22.1	68.9242	-78.34	57.4676	-0.131005	-0.886823	-1.44	-0.0117981	-0.0910273	0	-0.719292	-0.0041156	-0.00768254	0.645352	14.7372	4.57197	8.78226	67.027	84.396	4.717	2.47502	3.91904	2.21698	1	0	-0.190697	0.181073	18.1073	0	0
Panama	2017	1	0	0.519523	0.00755271	0.425296	0.028132	-0.613697	0.380334	7.45441	23.6	74.1503	-77.18	57.3135	-0.124276	-0.886823	-1.37	-0.00636223	-0.0799389	0	-0.649145	0	-0.00636223	0.577328	15.7177	5.74406	6.34573	67.365	84.0475	5.338	1.79469	4.03983	2.28368	1	0	-0.188127	0.18188	18.188	0	0
Panama	2018	1	0	0.557909	-0.159112	0.385193	0.012681	-0.610338	0.252162	7.31359	24.5	80.4227	-75.88	57.1134	-0.0994394	-0.886823	-1.34	0	-0.0799533	0	-0.65249	0	0	0.470262	11.6845	3.9182	7.44443	67.709	86.131	5.161	0.700537	3.89334	2.2028	1	0	-0.180511	0.184272	18.4272	0	0
Panama	2019	0	0	0.59875	-0.191899	0.380994	0.099871	-0.643827	0.290946	6.4224	19	54.9384	-83.51	56.9594	-0.316112	-0.886823	-1.48	-0.114995	-0.0778382	0	-0.868118	0	-0.114995	0.478122	10.843	3.10307	6.7135	68.059	80.4287	6.256	0.538351	3.87776	2.19419	0	0	-0.202231	0.17745	17.745	0	0
Panama	2020	0	1	0.573975	-0.284955	0.322711	0.164647	-0.584162	0.235503	7.80171	28.5	78.4474	-75.51	56.8056	-0.535098	-0.886823	-1.46	-0.14811	-0.0897067	0	-0.852041	0	-0.14811	0.33567	14.3047	-17.8212	-2.8598	68.414	68.7004	14.663	-0.494686	3.92597	2.22081	0	1	-0.154908	0.192313	19.2313	0	0
Peru	2002	1	0	0.222937	-0.557922	-0.0397658	-0.391419	-0.306405	-0.96991	26.345	40.2	82.7984	-61.35	58.6314	-2.00487	-0.826325	-2.96	-1.43413	-0.374787	-0.18972	-1.0429	-0.6529	-0.591513	1.55892	-161.407	5.45353	3.93562	73.85	35.2492	4.84	0.109017	-3.47937	-1.86814	1	0	0.0249117	0.248788	24.8788	0	0
Peru	2003	1	0	0.0786488	-0.588657	0.114226	-0.58518	-0.154855	-1.1621	26.6867	40.9	81.5882	-60.44	58.5339	-3.00372	-0.826325	-2.79	-2.10588	-0.358692	-0.179247	-1.00358	-0.711801	-1.21484	1.60775	-161.524	4.16502	2.27309	74.249	37.6246	4.15	1.80372	-3.39356	-1.82076	1	0	0.0488623	0.25631	25.631	0	0
Peru	2004	1	0	-0.13453	-0.545422	0.204361	-0.649821	-0.429987	-1.0274	24.2682	37.8	72.8583	-64.51	58.4364	-6.2346	-0.826325	-2.89	-4.34592	-0.343006	-0.178987	-1.0872	-0.616963	-3.54997	1.39354	-165.412	4.9582	2.39489	74.644	41.9361	4.71	6.27904	-3.67357	-1.97537	1	0	0.137615	0.284184	28.4184	0	0
Peru	2005	1	0	-0.0138193	-0.700788	0.00708298	-0.695961	-0.367371	-0.975715	22.9198	38.4	71.2297	-66.17	58.3389	-7.82323	-0.826325	-2.88	-5.50997	-0.315159	-0.16901	-1.02052	-0.772645	-4.56832	1.03955	-166.472	6.28506	3.39035	75.034	47.3573	4.87	3.50372	-3.33516	-1.78851	1	0	0.18764	0.299896	29.9896	0	0
Peru	2006	1	0	0.0919349	-0.704655	0.0748254	-0.757419	-0.221562	-0.841554	23.6334	38.7	72.2483	-64.09	58.2414	-13.4308	-0.826325	-2.59	-9.85035	-0.300915	-0.216595	-0.928184	-0.853617	-8.78014	0.826459	-166.085	7.5289	3.91066	75.421	51.7851	4.17	7.65625	-3.18204	-1.70396	1	0	0.367579	0.356409	35.6409	0	0
Peru	2007	1	0	0.108357	-0.751626	0.238475	-0.627492	-0.272556	-0.774886	22.3774	36	65.8386	-66.49	58.1439	-14.2133	-0.826325	-2.54	-9.57954	-0.272635	-0.2209	-0.923576	-0.775998	-8.58264	0.756692	-169.438	8.51839	5.37429	75.803	55.6881	4.08	1.49068	-3.47448	-1.86544	1	0	0.356597	0.352959	35.2959	0	0
Peru	2008	1	0	0.152135	-0.730336	0.320968	-0.43102	-0.206874	-0.892662	21.2247	33.7	59.3733	-68.93	58.0464	-12.0259	-0.826325	-2.56	-7.75827	-0.26063	-0.195661	-0.915514	-0.89861	-6.66399	0.413034	-172.969	9.12657	5.74336	76.052	58.4338	4.03	1.10328	-3.69884	-1.98932	1	0	0.273669	0.326914	32.6914	0	0
Peru	2009	0	0	0.0834904	-0.624267	0.366642	-0.489155	-0.33254	-1.18005	21.7347	32.9	61.0915	-68.31	57.9489	-8.92101	-0.971485	-2.56	-5.65672	-0.287884	-0.164049	-1.00347	-0.41267	-5.08	0.619666	-170.763	1.09582	5.32238	76.241	48.1119	3.96	2.0637	-3.77637	-2.03213	0	0	0.170817	0.294612	29.4612	0	0
Peru	2010	1	0	0.111125	-0.5661	0.392821	-0.239368	-0.253887	-0.999915	20.8775	32.2	56.5354	-69.33	57.8514	-11.2142	-1.11634	-2.46	-6.54243	-0.281713	-0.250536	-0.940811	-0.48065	-5.81124	0.578352	-169.162	8.33246	5.73088	76.43	51.6728	3.6	5.71073	-3.72227	-2.00226	1	0	0.215258	0.30857	30.857	0	0
Peru	2011	1	0	0.13124	-0.580826	0.404833	-0.206647	-0.243968	-0.76075	17.8585	30.6	55.7053	-72.9	57.7178	-12.7666	-1.2612	-2.66	-7.5059	-0.267649	-0.200526	-0.908071	-0.822427	-6.48294	0.47163	-174.533	6.32719	4.47263	76.617	55.9883	3.477	6.74579	-3.90979	-2.1058	1	0	0.263544	0.323735	32.3735	0	0
Peru	2012	1	0	0.114263	-0.58197	0.436642	-0.18742	-0.40407	-0.907365	17.0359	30.8	56.4585	-74.42	57.5841	-9.99928	-1.40605	-2.69	-6.16144	-0.254164	-0.170038	-0.82823	-0.664351	-5.32705	0.422848	-176.069	6.13972	7.36174	76.804	52.6199	3.238	1.20258	-3.85723	-2.07678	1	0	0.184042	0.298766	29.8766	0	0
Peru	2013	1	0	0.0847504	-0.57442	0.406302	-0.151038	-0.460947	-0.80574	17.6274	28.4	52.9486	-73.04	57.4505	-7.6542	-1.55091	-2.44	-4.43497	-0.23943	-0.191658	-0.842821	-0.576909	-3.6664	0.460218	-194.961	5.85252	4.75735	76.989	49.7871	3.575	1.05723	-3.74811	-2.01653	1	0	0.0946381	0.270687	27.0687	0	0
Peru	2014	0	0	0.192497	-0.522553	0.474248	-0.32671	-0.59998	-0.550657	16.8427	28.6	50.7714	-74.25	57.3169	-5.66293	-1.69576	-2.51	-3.04013	-0.231824	-0.225913	-0.933901	-0.591113	-2.2231	0.358067	-174.505	2.38216	2.12303	77.173	46.8531	3.208	2.43244	-3.50154	-1.88038	0	0	0.035331	0.25206	25.206	0	0
Peru	2015	0	0	0.227368	-0.49965	0.43928	-0.367454	-0.603917	-0.39891	15.6642	27.4	50.8549	-74.92	57.1832	-3.91149	-1.84062	-2.51	-2.29072	-0.227497	-0.18921	-1.0348	-0.248778	-1.85274	0.365788	-168.439	3.25224	3.86551	77.357	45.1628	3.272	2.69052	-3.4985	-1.8787	0	0	-0.0154893	0.236099	23.61	0	0
Peru	2016	1	0	0.268896	-0.496036	0.469326	-0.256282	-0.430348	-0.207935	15.0512	27.2	50.3882	-75.53	57.0393	-4.40524	-1.98547	-2.52	-2.91595	-0.22447	-0.234082	-1.11012	-0.114996	-2.56687	0.392008	-190.619	3.95332	3.54628	77.539	45.3888	3.741	3.08088	-3.5383	-1.90068	1	0	0.0066836	0.243063	24.3063	0	0
Peru	2017	0	0	0.274388	-0.523282	0.351488	-0.204775	-0.562385	-0.26351	14.03	27.6	58.5097	-74.87	56.9022	-5.89626	-2.13033	-2.49	-3.74955	-0.220851	-0.186105	-1.00876	-0.157567	-3.40588	0.394637	-164.51	2.51884	3.51333	77.72	47.5136	3.691	3.61566	-3.37001	-1.80776	0	0	0.0495378	0.256522	25.6522	0	0
Peru	2018	1	0	0.215108	-0.566743	0.443383	-0.32381	-0.597973	-0.276881	13.5985	27.9	60.9289	-74.92	56.7782	-5.95603	-2.27518	-2.5	-3.84476	-0.216301	-0.135323	-1.01067	-0.321731	-3.3877	0.401446	-163.699	3.96935	2.63825	77.907	48.6315	3.492	2.27742	-3.38348	-1.81519	1	0	0.0566876	0.258768	25.8768	0	0
Peru	2019	0	0	0.264963	-0.520058	0.517202	-0.125898	-0.509501	-0.163623	13.0783	27.1	60.1043	-75.52	56.6431	-2.49912	-2.34918	-2.54	-1.65142	-0.2105	-0.124058	-1.05159	-0.327781	-1.19959	0.489466	-192.98	2.24063	2.09129	78.099	46.9435	3.379	1.87222	-3.47173	-1.86392	0	0	-0.0461604	0.226467	22.6467	0	0
Peru	2020	0	1	0.246405	-0.382844	0.471264	-0.29428	-0.524637	-0.357723	15.6056	31.6	63.9757	-71.21	56.5081	-3.97961	-2.34918	-2.41	-2.16456	-0.231848	-0.138015	-1.07154	-0.157268	-1.86928	0.46607	-181.826	-10.9333	0.329387	78.297	44.246	7.179	3.71917	-3.25627	-1.74495	0	1	-0.0042026	0.239644	23.9644	0	0
Philippines	2002	1	0	0.164603	-0.386543	-0.157631	-0.178975	-0.538532	-0.858753	19.3771	31.8	35.6985	-55.52	24.1988	-0.559004	-16.4697	-4.23	-0.125754	-0.810417	0	-1.5619	-0.0974249	-0.0283286	0.861567	-178.63	3.71626	2.09828	45.965	83.8448	3.615	4.23109	-0.293193	-0.108852	1	0	-0.164611	0.189265	18.9265	0	0
Philippines	2003	1	0	0.153801	-0.550385	-0.109685	-0.147019	-0.635372	-1.55981	18.9204	30.9	33.4696	-56.75	24.0413	-0.772664	-16.4697	-4.02	-0.183375	-0.757804	0	-1.62467	-0.159741	-0.0236335	0.790282	-176.708	5.08691	0.565263	45.88	87.5746	3.527	3.19213	-0.646965	-0.304192	1	0	-0.168251	0.188122	18.8122	0	0
Philippines	2004	1	0	0.0255536	-0.628952	-0.369468	-0.22179	-0.707702	-1.70588	18.6394	30.2	33.7773	-55.58	23.8838	-0.875871	-16.4697	-3.74	-0.268015	-0.726598	0	-1.5961	-0.202011	-0.0660036	0.663987	-150.791	6.56923	0.623145	45.795	87.1253	3.554	5.89076	-0.601447	-0.279058	1	0	-0.17474	0.186084	18.6084	0	0
Philippines	2005	1	0	-0.00725506	-0.333545	-0.215828	-0.0164203	-0.662844	-1.17879	18.7717	31.3	32.4168	-57.07	23.7264	-0.89117	-16.4697	-3.67	-0.353035	-0.738491	0	-1.51295	-0.279306	-0.0737288	0.671457	-153.483	4.94251	1.54906	45.71	83.8457	3.795	5.91089	-0.749673	-0.360903	1	0	-0.178951	0.184762	18.4762	0	0
Philippines	2006	1	0	-0.0911425	-0.406893	-0.192075	-0.134328	-0.889427	-1.63867	19.6074	33.3	36.0824	-54.38	23.5689	-1.46997	-16.4697	-3.45	-0.753462	-0.736482	0	-1.2222	-0.217661	-0.535801	0.477176	-143.842	5.31642	2.12092	45.625	80.8505	4.052	5.11159	-0.57916	-0.266752	1	0	-0.171228	0.187187	18.7187	0	0
Philippines	2007	1	0	-0.110542	-0.463092	-0.126927	0.106632	-0.778005	-1.60489	19.95	32.4	31.6599	-55.48	23.4114	-2.90666	-17.0138	-3.32	-1.9847	-0.735137	0	-1.10928	-0.244692	-1.74	0.456973	-151.943	6.51929	1.87121	45.54	73.645	3.434	3.16429	-0.49621	-0.22095	1	0	-0.136463	0.198106	19.8106	0	0
Philippines	2008	1	0	-0.138753	-0.550222	-0.0791467	0.0476356	-0.778095	-1.77924	19.7222	33.9	33.9815	-55.53	23.2539	-1.52341	-17.2211	-3.34	-0.698982	-0.755625	0	-1.01534	-0.345808	-0.353174	0.445418	-153.87	4.34449	0.737801	45.455	67.6811	3.72	7.17922	-0.288127	-0.106055	1	0	-0.185465	0.182716	18.2716	0	0
Philippines	2009	0	0	-0.0277493	-0.574997	-0.112536	0.0282764	-0.786739	-1.72876	21.0379	34.1	32.6764	-54.47	23.0965	-1.17474	-17.0263	-3.21	-0.495702	-0.76502	0	-1.07348	-0.244695	-0.251007	0.475113	-156.596	1.44832	1.17325	45.371	60.8866	3.858	2.73826	-0.429029	-0.183855	0	0	-0.19902	0.178458	17.8458	0	0
Philippines	2010	1	0	-0.0390455	-0.553794	-0.215251	0.0709009	-0.781124	-1.65076	20.8619	32.7	26.3784	-56.97	22.939	-2.11756	-17.3848	-3.13	-1.16108	-0.762311	0	-1.01033	-0.29022	-0.870862	0.421929	-162.684	7.3345	0.513698	45.332	66.1043	3.605	4.37088	-0.484571	-0.214524	1	0	-0.184771	0.182934	18.2934	0	0
Philippines	2011	1	0	-0.0199027	-0.506389	-0.16097	0.189581	-0.685035	-1.39218	21.2842	33.8	28.7636	-56.4	23.056	-2.84367	-17.5489	-3.05	-1.69886	-0.783453	0	-0.949812	-0.347774	-1.35108	0.465534	-169.485	3.85823	0.856963	45.522	60.7958	3.592	3.91881	-0.368533	-0.150452	1	0	-0.161092	0.190371	19.0371	0	0
Philippines	2012	1	0	-0.0296867	-0.52241	0.0405046	0.205686	-0.573895	-1.18824	21.1706	34.1	28.5479	-56.69	23.173	-1.55357	-17.5883	-2.97	-0.731215	-0.761373	0	-0.920701	-0.226906	-0.504309	0.446043	-173.149	6.89695	1.22763	45.712	57.842	3.504	1.99418	-0.537574	-0.24379	1	0	-0.208693	0.175421	17.5421	0	0
Philippines	2013	1	0	0.00626141	-0.469006	0.0231476	0.205929	-0.380066	-1.08425	21.3093	33.1	26.5409	-58.52	23.29	-1.18594	-17.6299	-2.87	-0.477698	-0.726968	0	-0.972957	-0.170691	-0.307007	0.432734	-184.762	6.75053	1.31643	45.903	55.8248	3.497	2.06106	-0.561075	-0.256767	1	0	-0.226183	0.169928	16.9928	0	0
Philippines	2014	1	0	0.159193	-0.369523	0.0773035	0.317714	-0.439755	-0.713821	20.4645	32.4	25.737	-59.54	23.407	-1.50897	-17.6267	-2.89	-0.782796	-0.71682	0	-1.03337	-0.192912	-0.589884	0.42884	-196.246	6.34799	1.92938	46.093	57.4682	3.6	3.05306	-0.289661	-0.106902	1	0	-0.213127	0.174028	17.4028	0	0
Philippines	2015	1	0	0.147048	-0.417368	0.0541702	0.160158	-0.481131	-0.854724	19.1619	30.8	25.5286	-61.21	23.524	-0.758148	-18.0376	-2.95	-0.320637	-0.699032	0	-1.13045	-0.118811	-0.201826	0.480895	-209.506	6.34831	1.84018	46.284	59.1416	3.068	-0.719683	-0.269858	-0.0959673	1	0	-0.235297	0.167065	16.7065	0	0
Philippines	2016	1	0	0.163373	-0.431536	0.112924	0.0184973	-0.519235	-1.37869	18.4978	28.6	24.3251	-62.81	23.641	-0.661597	-18.1858	-2.91	-0.230761	-0.672343	0	-1.23718	-0.114864	-0.115897	0.506555	-219.886	7.14946	2.59851	46.475	61.7761	2.695	1.28031	-0.30041	-0.112837	1	0	-0.241376	0.165156	16.5156	0	0
Philippines	2017	1	0	0.0839975	-0.501289	0.127082	-0.0349111	-0.507542	-1.18929	17.9484	27.8	24.6858	-65.31	23.758	-0.964596	-19.1631	-2.89	-0.371447	-0.621739	0	-1.3696	-0.130523	-0.240924	0.59164	-248.464	6.93099	3.12239	46.682	68.1684	2.552	2.32026	-0.417421	-0.177446	1	0	-0.232026	0.168093	16.8093	0	0
Philippines	2018	1	0	0.0210947	-0.565135	0.0287664	0.0623491	-0.576294	-1.0962	17.6996	27.6	23.4897	-65.85	23.875	-0.943783	-19.2396	-2.8	-0.435465	-0.602969	0	-1.41448	-0.183688	-0.251777	0.850634	-279.572	6.34149	2.86834	46.907	72.1634	2.338	3.74065	-0.555123	-0.25348	1	0	-0.234185	0.167414	16.7414	0	0
Philippines	2019	1	0	0.00574714	-0.574402	0.1002	0.059953	-0.606207	-0.928061	17.7949	26.9	20.9368	-65.72	23.992	-0.7853	-17.9529	-2.66	-0.393412	-0.596155	0	-1.43048	-0.152601	-0.240811	1.00317	-287.393	6.11853	2.30117	47.149	68.8418	2.237	0.697076	-0.511455	-0.229368	1	0	-0.24495	0.164033	16.4033	0	0
Philippines	2020	0	1	-0.106204	-0.65207	0.113157	0.0678124	-0.510658	-0.778704	18.4076	29.1	21.3904	-64.25	24.109	-0.764113	-18.2625	-2.78	-0.391288	-0.684627	0	-1.44045	-0.109874	-0.281414	0.962828	-276.589	-9.51829	1.88586	47.408	58.1696	2.522	1.65049	-0.562785	-0.257711	0	1	-0.237497	0.166374	16.6374	0	0
Poland	2002	0	0	1.08782	0.670436	0.650061	0.454927	0.381514	0.743998	4.58647	7.5	3.04872	-95.87	29.7528	-0.565655	-21.8638	-5.77	-0.1273	-0.295436	0	-2.91827	-0.109638	-0.0176616	2.25405	-364.246	1.90119	2.04863	61.787	60.7968	20.211	1.81507	-1.67272	-0.870576	0	0	-0.157069	0.191634	19.1634	0	0
Poland	2003	1	0	1.0126	0.510291	0.694821	0.509646	0.401546	0.578085	4.53705	7.3	2.55357	-96.25	29.8459	-0.598446	-21.9761	-5.72	-0.143551	-0.277478	0	-2.89989	-0.1137	-0.029851	2.35669	-372.438	3.52337	2.45743	61.676	69.2134	19.899	0.774658	-1.7821	-0.930973	1	0	-0.160061	0.190694	19.0694	0	0
Poland	2004	1	0	1.01663	0.416307	0.758691	0.439104	0.106036	0.153858	4.66636	7.3	3.12409	-95.98	29.9252	-1.44432	-22.0862	-5.47	-0.344082	-0.272861	0	-2.69534	-0.227962	-0.11612	2.52694	-361.552	5.0908	5.41151	61.564	70.9816	18.822	4.93312	-1.9	-0.99607	1	0	-0.158849	0.191075	19.1075	0	0
Poland	2005	0	0	0.944372	0.470091	0.812518	0.44604	0.247519	0.363083	4.80838	7.2	3.45679	-95.99	30.0134	-1.16882	-22.1974	-5.35	-0.282592	-0.271322	0	-2.33635	-0.173871	-0.108721	2.5027	-362.44	3.26082	3.59642	61.452	70.3115	17.592	2.62309	-1.98596	-1.04353	0	0	-0.183224	0.18342	18.342	0	0
Poland	2006	1	0	0.803532	0.382762	0.701599	0.332139	0.256551	0.354032	4.92267	7.2	3.26177	-95.82	30.1025	-1.60098	-22.3086	-5.29	-0.505281	-0.254027	0	-2.29447	-0.205666	-0.299615	2.44439	-382.337	6.20211	6.20791	61.341	77.7008	13.794	1.75153	-1.81685	-0.950156	1	0	-0.173078	0.186606	18.6606	0	0
Poland	2007	1	0	0.879502	0.409072	0.768657	0.358851	0.283814	0.682846	4.97809	7.3	3.80482	-95.21	30.1907	-1.36253	-22.4254	-4.92	-0.409548	-0.240588	0	-1.94783	-0.179174	-0.230374	2.53574	-387.031	6.76045	5.82502	61.229	80.7454	9.551	3.79514	-1.68362	-0.876591	1	0	-0.205601	0.176392	17.6392	0	0
Poland	2008	1	0	0.953482	0.550622	0.844262	0.462066	0.452767	0.911096	5.6569	8	4.67064	-94.11	30.2808	-2.04775	-21.194	-4.79	-0.445552	-0.229064	0	-1.58383	-0.352732	-0.0928203	2.44383	-378.84	4.38377	2.721	61.116	80.5747	7.069	3.9343	-1.54755	-0.801463	1	0	-0.204914	0.176608	17.6608	0	0
Poland	2009	0	0	1.02687	0.645847	0.976622	0.517222	0.4351	0.938135	6.68431	8.8	6.15815	-93.17	30.3709	-1.14376	-21.4739	-4.48	-0.296051	-0.220289	0	-1.92659	-0.178823	-0.117228	2.33067	-362.355	2.61513	3.18105	61.004	74.9686	8.131	3.88765	-1.70905	-0.890636	0	0	-0.217494	0.172656	17.2657	0	0
Poland	2010	0	0	1.03761	0.712359	1.02316	0.630122	0.513737	1.01733	7.21198	9.5	7.40357	-92.47	30.4591	-4.33027	-20.2799	-4.65	-1.19079	-0.212603	0	-1.94966	-0.218676	-0.972115	2.36319	-383.132	3.16893	3.94489	60.892	82.2259	9.578	1.57922	-1.43505	-0.739345	0	0	-0.136504	0.198093	19.8093	0	0
Poland	2011	1	0	1.02763	0.794909	0.958582	0.596361	0.562476	1.07206	7.79961	10.4	8.39115	-92.13	30.5235	-5.71416	-22.2201	-4.45	-1.61744	-0.205518	0	-1.83151	-0.27697	-1.34047	2.32717	-374.332	5.25546	3.57129	60.78	86.9237	9.576	3.06571	-1.30586	-0.668011	1	0	-0.115901	0.204564	20.4563	0	0
Poland	2012	0	0	1.06428	0.817869	0.996396	0.657871	0.659754	1.04948	8.62354	10.9	10.7619	-90.98	30.5839	-3.79887	-21.3993	-4.24	-0.443194	-0.201134	0	-1.97841	-0.208128	-0.235066	2.42873	-368.91	1.51178	1.52886	60.654	88.8299	10.031	2.18343	-1.41846	-0.73018	0	0	-0.169884	0.187609	18.7609	0	0
Poland	2013	0	0	0.998091	0.839545	1.05261	0.659245	0.645681	0.973355	8.44809	11.4	10.7619	-91.14	30.6443	-3.33331	-20.9701	-4.2	-0.340743	-0.190068	0	-1.94016	-0.176178	-0.164566	2.34802	-359.931	0.684241	0.258983	60.529	90.4175	10.293	0.270976	-1.40715	-0.723936	0	0	-0.181214	0.184051	18.4051	0	0
Poland	2014	1	0	1.10509	0.871606	1.06332	0.768984	0.681906	0.842941	8.7414	11.6	12.8767	-90.07	30.7058	-3.15768	-19.834	-3.9	-0.268924	-0.175264	0	-1.8554	-0.134234	-0.13469	2.46981	-352.207	3.92051	3.85089	60.403	92.034	8.971	0.482272	-1.33032	-0.681513	1	0	-0.196568	0.179229	17.9229	0	0
Poland	2015	1	0	1.03976	0.803595	0.954634	0.741089	0.694462	0.862319	8.77676	11.9	14.1941	-90	30.7652	-1.29098	-19.4925	-3.77	-0.202022	-0.168416	0	-2.18879	-0.0998187	-0.102203	2.49656	-357.743	4.43177	3.29546	60.278	92.2554	7.475	1.32071	-1.27705	-0.652099	1	0	-0.214865	0.173482	17.3482	0	0
Poland	2016	0	0	0.844246	0.593824	0.906232	0.651506	0.759568	0.496158	8.20102	11.3	13.9912	-90.25	30.8142	-2.02625	-19.1959	-3.83	-0.176975	-0.167007	0	-2.38302	-0.080201	-0.0967737	2.5719	-361.945	3.03118	3.81609	60.178	96.8659	6.141	0.0828624	-1.0382	-0.520216	0	0	-0.197022	0.179086	17.9086	0	0
Poland	2017	1	0	0.776028	0.400895	0.80514	0.550777	0.698781	0.509756	7.83961	11.1	14.4485	-90.42	30.8534	-3.06146	-18.806	-3.81	-0.240569	-0.168985	0	-2.33004	-0.0992919	-0.141277	2.51462	-374.722	5.15246	2.37813	60.105	100.566	4.867	1.7702	-1.16133	-0.588206	1	0	-0.18171	0.183895	18.3895	0	0
Poland	2018	1	0	0.710339	0.376929	0.874215	0.546893	0.622787	0.480489	10.757	15.1	12.9783	-87.52	30.8946	-2.71315	-17.9067	-3.77	-0.283467	-0.163439	0	-2.16685	-0.122085	-0.161382	2.58902	-374.554	6.24586	3.34804	60.058	102.442	3.835	1.227	-1.23648	-0.6297	1	0	-0.183861	0.183219	18.3219	0	0
Poland	2019	1	0	0.671802	0.391242	1.01351	0.512825	0.611019	0.550717	11.3391	15.6	15.9761	-86.23	30.9399	-0.671601	-16.7612	-3.48	-0.180124	-0.161282	0	-2.10715	-0.0915205	-0.0886038	2.52024	-374.608	4.58046	3.15456	60.037	101.581	3.267	3.02645	-0.982017	-0.489195	1	0	-0.221817	0.171299	17.1299	0	0
Poland	2020	0	1	0.615375	0.524749	0.850682	0.324195	0.618672	0.491619	11.6887	16.1	18.3995	-85.4	30.977	-0.535469	-16.1698	-3.44	-0.111786	-0.166593	0	-2.03936	-0.0520976	-0.059688	2.2754	-356.727	-2.03557	3.31499	60.043	99.2591	3.155	4.23859	-1.11659	-0.563502	0	1	-0.223788	0.17068	17.068	0	0
Portugal	2002	0	0	1.30455	1.30751	1.24721	1.15235	1.21802	1.43705	10.9928	18.3	22.1008	-85.26	35.7945	-0.11683	-26.8367	-3.36	-0.117126	-0.124515	-0.115519	-0.995838	0	-0.00160704	2.99125	-75.0149	0.770925	0.436137	55.666	62.3083	4.497	4.18978	-1.63287	-0.848572	0	0	-0.279377	0.153221	15.3221	0	0
Portugal	2003	0	1	1.40958	1.27625	1.22238	1.10679	1.1191	1.28969	11.3222	22.1	38.4914	-81.77	35.7628	-0.113795	-26.2225	-3.3	-0.113986	-0.117988	-0.113033	-0.777468	0	-0.000952137	2.94989	-81.8207	-0.930521	6.26697	56.287	61.1389	6.132	3.42715	-2.01208	-1.05796	0	1	-0.264251	0.157972	15.7972	0	0
Portugal	2004	0	0	1.46491	1.23305	1.18725	1.04428	1.12567	0.969877	11.1461	19.9	27.9183	-82.76	35.7311	-0.150871	-25.6084	-3.33	-0.123384	-0.107203	-0.0888025	-0.733005	0	-0.0345812	2.94751	-75.1102	1.78874	1.31225	56.907	63.2046	6.319	2.39961	-2.35957	-1.24983	0	0	-0.278833	0.153392	15.3392	0	0
Portugal	2005	0	0	1.43031	1.22432	1.27927	1.05113	1.06188	1.01665	11.2134	18.1	18.5658	-84.12	35.7112	-0.164404	-24.9943	-3.39	-0.131508	-0.0990475	-0.0870681	-0.782619	-9.0847e-05	-0.0443495	2.89124	-85.0417	0.781848	1.70741	57.522	62.9445	7.582	3.3329	-1.82941	-0.957091	0	0	-0.285621	0.15126	15.126	0	0
Portugal	2006	0	0	1.23266	0.975267	1.06493	0.867631	1.00924	0.952391	12.1561	22.3	33.0084	-80.82	35.6795	-0.282892	-23.8389	-3.17	-0.210331	-0.0935815	-0.102049	-0.7309	-0.00804492	-0.100237	2.7916	-75.8696	1.62504	6.41633	58.137	68.5471	7.649	3.18454	-2.23168	-1.17921	0	0	-0.265866	0.157464	15.7464	0	0
Portugal	2007	0	0	1.23142	1.00311	1.08141	0.894494	1.0288	0.821809	12.5841	23.1	35.0772	-79.24	35.6478	-0.276603	-24.0684	-3.12	-0.211834	-0.0847639	-0.114607	-0.648277	-0.0108762	-0.0863501	2.74922	-72.8495	2.50658	2.50093	58.749	69.9461	7.965	2.96635	-2.06376	-1.08649	0	0	-0.265599	0.157548	15.7548	0	0
Portugal	2008	0	0	1.20186	1.01124	1.10055	1.07738	1.05923	0.987546	12.8565	23.2	32.933	-78.63	35.616	-0.240483	-23.8929	-3.03	-0.196999	-0.0784999	-0.114955	-0.599206	-0.0244458	-0.0575988	2.50631	-64.433	0.319247	2.96893	59.359	72.0757	7.553	1.73772	-2.19305	-1.15788	0	0	-0.270516	0.156004	15.6004	0	0
Portugal	2009	0	1	1.12824	1.05841	0.989448	1.15221	1.08558	0.787382	13.7335	24.9	37.8755	-78.09	35.5377	-0.110114	-23.7173	-3.08	-0.112666	-0.0752043	-0.109019	-0.657462	-0.0036276	-1.92599e-05	2.44031	-62.3297	-3.12208	2.35134	59.964	61.4927	9.432	1.09813	-2.16161	-1.14052	0	1	-0.261864	0.158721	15.8721	0	0
Portugal	2010	0	0	1.1072	1.02578	0.717937	0.981475	1.06266	0.717687	13.5875	27.8	53.1557	-75.13	35.5061	-0.219239	-23.5418	-2.92	-0.175403	-0.0692665	-0.105534	-0.631472	-0.0267204	-0.0431479	2.42779	-60.7522	1.73762	3.77377	60.567	67.6892	10.771	0.782136	-2.15305	-1.1358	0	0	-0.243307	0.16455	16.455	0	0
Portugal	2011	0	1	1.10791	0.996394	0.62163	0.921246	1.08125	0.741739	14.2741	27.2	47.063	-75.66	35.6371	-0.244908	-23.3662	-2.89	-0.0841027	-0.0654612	0	-0.616863	-0.0552673	-0.0288354	2.31914	-62.5072	-1.71353	4.23649	61.167	73.0076	12.682	-0.260435	-1.89254	-0.991951	0	1	-0.253938	0.161211	16.1211	0	0
Portugal	2012	0	1	1.02853	1.03611	0.821373	1.00191	0.955448	0.775273	13.5458	25.5	43.7843	-75.81	35.7681	-0.259819	-23.1906	-2.83	-0.0812341	-0.0643265	0	-0.70969	-0.0452353	-0.0359987	2.18847	-62.3231	-4.0509	7.21535	61.763	75.9411	15.531	-0.376402	-1.6643	-0.865924	0	1	-0.256805	0.16031	16.031	0	0
Portugal	2013	0	1	1.06689	1.03865	0.798301	1.19422	0.912172	0.748763	13.7815	30.2	59.2374	-73.44	35.8932	-0.196206	-23.0151	-2.86	-0.0567992	-0.0597393	0	-0.67369	-0.0469169	-0.00988235	2.20788	-61.5369	-0.984107	6.43654	62.352	78.0305	16.188	2.27439	-1.50789	-0.77956	0	1	-0.2344	0.167347	16.7347	0	0
Portugal	2014	0	0	1.10744	1.11946	0.745933	0.98317	0.909373	0.806274	14.0917	30.5	61.369	-72.78	36.024	-0.204731	-22.8395	-2.8	-0.0516624	-0.0536328	0	-0.686727	-0.0472878	-0.0043746	2.31248	-56.5554	0.741391	5.43851	62.936	80.2207	13.897	0.724457	-1.18392	-0.600677	0	0	-0.233011	0.167783	16.7783	0	0
Portugal	2015	0	0	1.12872	1.10189	0.941804	1.15793	0.89214	0.904213	13.8472	27.2	48.6663	-75.8	36.155	-0.15971	-22.664	-2.85	-0.0203952	-0.0482194	0	-0.893309	-0.0199326	-0.000462629	2.45879	-62.1087	1.5898	0.635222	63.514	80.6347	12.447	1.96245	-1.37086	-0.703901	0	0	-0.245335	0.163913	16.3913	0	0
Portugal	2016	0	0	1.15759	1.04333	0.832202	1.14833	0.858935	0.958626	14.1383	29	55.5233	-75.29	36.155	-0.158383	-22.4884	-2.77	-0.014775	-0.0448984	0	-0.869387	-0.0147743	-7.46751e-07	2.63914	-65.7418	2.00414	3.56283	64.086	79.5223	11.068	1.85409	-1.64404	-0.85474	0	0	-0.240855	0.16532	16.532	0	0
Portugal	2017	0	0	1.19825	1.10398	0.89715	1.29405	0.821429	1.10617	13.5659	24.4	40.901	-78.96	36.155	-0.191627	-16.2144	-2.8	-0.0460454	-0.0428008	0	-0.92313	-0.0226973	-0.0233481	2.62254	-90.2745	3.31472	5.02042	64.652	84.8078	8.869	1.5322	-1.64275	-0.854028	0	0	-0.252633	0.161621	16.1621	0	0
Portugal	2018	0	0	1.17853	1.10798	0.874975	1.18115	0.806316	1.11531	14.0338	27.5	51.3733	-75.45	36.155	-0.240667	-16.1303	-2.63	-0.0858262	-0.040212	0	-0.820383	-0.0340519	-0.0517743	2.62071	-63.1272	2.94628	3.46584	65.211	86.7357	6.994	1.85237	-1.69315	-0.881858	0	0	-0.243706	0.164424	16.4424	0	0
Portugal	2019	0	0	1.19455	1.10636	0.95791	1.13419	0.745498	1.05175	14.7781	28.2	54.2392	-73.11	36.155	-0.221432	-16.1303	-2.53	-0.0934581	-0.0390835	0	-0.778759	-0.0299846	-0.0634736	2.64989	-57.921	2.74568	4.50389	65.764	86.771	6.464	1.83437	-1.61078	-0.836372	0	0	-0.24283	0.164699	16.4699	0	0
Portugal	2020	0	1	1.2553	1.15668	0.822069	0.979601	0.721146	1.00873	16.345	31.3	59.6287	-70.41	36.155	-0.200282	-16.1303	-2.56	-0.177444	-0.040996	-0.0970036	-0.75752	-0.0187356	-0.0617049	2.48031	-52.0406	-8.20463	1.81415	66.31	76.5086	6.801	2.10314	-1.58283	-0.82094	0	1	-0.223947	0.17063	17.063	0	0
Romania	2002	1	0	0.386146	-0.265605	0.0457018	-0.196588	-0.440713	0.46484	6.45965	14.4	29.3213	-86.75	27.8236	-2.7112	-21.7603	-5.22	-1.87958	-0.407784	0	-4.14238	-1.86463	-0.0149463	1.57646	-104.45	5.70299	2.48342	52.78	53.7102	8.112	22.7143	1.0083	0.609783	1	0	0.0130743	0.24507	24.507	0	0
Romania	2003	0	0	0.299219	-0.210054	-0.0518503	-0.283442	-0.41067	0.32003	7.38016	15.7	24.0515	-86.94	27.8787	-2.46447	-20.0755	-5.31	-1.69772	-0.381798	0	-3.65283	-1.67912	-0.0186039	2.29911	-108.046	2.34115	3.18996	52.912	56.1795	6.95	23.1533	0.886976	0.542793	0	0	-0.0221114	0.23402	23.402	0	0
Romania	2004	1	0	0.367766	-0.186783	0.180781	-0.174916	-0.322502	0.0593486	8.31785	17.3	29.2342	-84.49	27.9374	-2.42711	-16.8098	-4.69	-1.7226	-0.326542	0	-2.92888	-1.69374	-0.0288576	2.37351	-108.178	10.4281	8.59369	53.043	60.6265	7.719	15.4566	0.542846	0.352778	1	0	-0.0588115	0.222493	22.2493	0	0
Romania	2005	1	0	0.408909	-0.154217	0.242886	-0.289698	-0.260543	0.0856026	8.48334	18.5	34.0213	-83.86	28.0046	-1.98127	-14.4172	-4.46	-1.42549	-0.311516	0	-2.30592	-1.40812	-0.0173728	2.00584	-104.987	4.66815	6.60067	53.174	59.3605	7.174	12.007	0.712093	0.446229	1	0	-0.0976231	0.210304	21.0304	0	0
Romania	2006	1	0	0.517973	-0.134708	0.441959	-0.189176	-0.209159	0.14843	8.18842	17.4	29.2835	-85.05	28.0694	-2.07749	-12.5767	-4.28	-1.52007	-0.301028	0	-2.0638	-1.48687	-0.0331954	1.94236	-111.944	8.02881	9.02006	53.305	61.6836	7.27	10.6066	0.502974	0.330761	1	0	-0.112992	0.205477	20.5477	0	0
Romania	2007	1	0	0.498998	-0.105704	0.506392	-0.352275	-0.230331	0.198068	8.72032	18.2	25.9489	-83.16	28.1452	-1.63281	-16.2435	-3.97	-1.19627	-0.296474	0	-1.50247	-1.19055	-0.00572402	2.0035	-108.898	7.23381	5.78679	53.436	63.5052	6.413	15.8162	0.745611	0.464737	1	0	-0.171067	0.187238	18.7238	0	0
Romania	2008	1	0	0.514151	-0.0155703	0.597521	-0.357895	-0.186216	0.180609	9.89936	20.4	26.5176	-79.82	28.2088	-2.12305	-17.0363	-3.61	-1.57638	-0.276662	0	-1.22176	-1.57379	-0.00259159	1.69234	-106.155	9.30747	6.37742	53.567	65.1752	5.787	16.0149	1.09396	0.657079	1	0	-0.161808	0.190146	19.0146	0	0
Romania	2009	0	1	0.464297	0.0539404	0.617715	-0.363971	-0.3098	0.359366	11.2972	22.1	27.279	-76.56	28.2539	-1.43548	-16.2246	-3.37	-0.995158	-0.280231	0	-1.29672	-0.988251	-0.00690616	1.79008	-87.1555	-5.51671	2.66364	53.698	58.4701	6.859	4.09158	1.26436	0.751172	0	1	-0.195891	0.179441	17.9441	0	0
Romania	2010	0	1	0.43213	0.10641	0.672567	-0.112342	-0.352395	0.2736	11.8329	24.1	33.8811	-75.02	28.3199	-1.71353	-14.6744	-3.52	-1.07653	-0.269548	0	-1.31992	-1.06156	-0.0149642	2.06002	-79.9445	-3.90581	1.88972	53.829	69.9549	6.959	5.93211	1.43958	0.847919	0	1	-0.171765	0.187019	18.7019	0	0
Romania	2011	1	0	0.376137	0.104708	0.68746	-0.194316	-0.333499	0.186091	10.3279	21.1	26.572	-77.61	28.6405	-2.28818	-15.5545	-3.44	-1.46907	-0.2216	0	-1.31774	-1.44677	-0.0223007	1.85396	-85.6395	4.49559	1.23043	53.96	76.2714	7.177	3.98255	1.46853	0.863908	1	0	-0.161802	0.190148	19.0148	0	0
Romania	2012	0	0	0.31853	0.0929005	0.564533	-0.169485	-0.381443	0.0823416	11.3014	21.5	25.7383	-76.36	28.9948	-2.18833	-15.295	-3.29	-1.42291	-0.212522	0	-1.44353	-1.40293	-0.0199812	1.91172	-80.4649	1.90362	1.70144	53.974	76.5943	6.794	3.81024	1.57261	0.921373	0	0	-0.162938	0.189791	18.9791	0	0
Romania	2013	0	0	0.311483	0.190215	0.634415	0.134711	-0.301039	0.179133	12.1308	23.1	34.8117	-73.42	29.3291	-1.87595	-15.1439	-3	-1.21197	-0.187938	0	-1.24614	-1.19961	-0.012366	2.06559	-72.188	0.278772	2.03101	53.937	81.3976	7.096	1.39459	1.54272	0.904871	0	0	-0.180096	0.184402	18.4402	0	0
Romania	2014	1	0	0.428103	0.242156	0.600805	0.224672	-0.224213	0.0491361	12.3255	24.3	42.0262	-72.58	29.6582	-1.51017	-14.823	-2.85	-0.937296	-0.180495	0	-1.21185	-0.927262	-0.0100332	2.74463	-61.8612	4.116	1.93729	53.9	83.3751	6.802	1.71417	1.6197	0.947379	1	0	-0.199403	0.178338	17.8338	0	0
Romania	2015	0	0	0.48617	0.204882	0.568358	0.0987905	-0.170948	0.181799	12.0195	23.7	40.0863	-73.17	29.9937	-0.975979	-15.2548	-2.78	-0.603202	-0.159559	0	-1.44849	-0.594729	-0.00847324	2.80563	-63.8762	3.15704	2.42726	53.887	83.5206	6.812	3.26453	1.50686	0.885071	0	0	-0.217756	0.172574	17.2574	0	0
Romania	2016	0	0	0.54108	0.452453	0.56633	-0.0682619	-0.178657	0.266823	12.5338	24.4	42.2055	-72.22	30.1158	-0.688994	-15.0401	-2.7	-0.362176	-0.158244	0	-1.40648	-0.353977	-0.00819858	2.75991	-61.5435	2.85993	3.37418	53.9	85.8925	5.901	2.61992	1.13111	0.677597	0	0	-0.231443	0.168276	16.8276	0	0
Romania	2017	1	0	0.598849	0.436648	0.43302	-0.0847913	-0.141483	0.0485142	12.2081	23.4	38.324	-73.22	30.1158	-0.884924	-15.9816	-2.62	-0.477322	-0.159472	0	-1.34051	-0.467935	-0.00938737	2.23686	-67.0729	8.19548	2.83273	53.936	87.1561	4.927	4.65131	0.898693	0.549263	1	0	-0.231584	0.168231	16.8231	0	0
Romania	2018	1	0	0.533205	0.367548	0.406415	-0.177138	-0.226883	0.0363187	11.8229	23	41.044	-73.22	30.1158	-1.07026	-15.1392	-2.49	-0.643401	-0.161726	0	-1.23325	-0.633342	-0.0100595	2.2081	-70.77	6.12093	3.01622	53.998	86.4912	4.187	6.18675	0.84676	0.520587	1	0	-0.227501	0.169514	16.9514	0	0
Romania	2019	1	0	0.515234	0.415344	0.443314	-0.215104	-0.236893	0.542256	12.2616	23.5	42.0319	-72.04	30.1158	-0.798252	-16.5007	-2.37	-0.475352	-0.161712	0	-1.21868	-0.468319	-0.0070331	2.33233	-68.9049	3.92326	2.92654	54.084	84.3677	3.912	6.94651	0.914317	0.55789	1	0	-0.243101	0.164614	16.4614	0	0
Romania	2020	0	1	0.585118	0.36869	0.346218	-0.286944	-0.0985998	0.50895	12.9948	24.1	44.5646	-70.47	30.1158	-0.508984	-17.4516	-2.39	-0.230257	-0.175233	0	-1.15957	-0.223724	-0.00653308	2.15528	-60.2806	-3.67438	1.42934	54.194	77.9236	5.035	4.11052	0.761074	0.473275	0	1	-0.253804	0.161253	16.1253	0	0
Senegal	2002	0	0	0.380685	0.0892517	-0.271161	-0.0458442	0.247914	-0.273944	45.8959	43.8	0.723581	-52.6	45.5833	-2.28949	-8.60833	-4.13	-0.0201251	-2.61055	0	-1.33686	-1.10792e-05	-0.0201141	1.05491	-1.4671	0.0686966	1.18024	40.607	53.1443	2.828	1.90465	2.64537	1.51371	0	0	-0.101586	0.209059	20.9059	0	0
Senegal	2003	1	0	0.266686	-0.0520305	-0.308505	-0.38783	-0.141307	-0.250178	46.7402	43.7	0.703911	-51.77	45.3834	-2.68475	-8.67388	-3.78	-0.00597987	-2.3604	0	-1.08765	-0.000128798	-0.00585107	1.16262	-1.421	5.59395	0.986458	40.898	50.8212	2.794	-0.92288	2.54185	1.45655	1	0	-0.115711	0.204623	20.4623	0	0
Senegal	2004	1	0	0.172797	0.0201852	-0.323487	-0.340703	0.0232224	0.0295108	43.3796	39.9	0.678445	-55.08	45.1834	-1.97163	-8.73942	-3.87	-0.0247231	-2.38485	0	-1.19077	-0.000170075	-0.024553	1.21638	-2.2461	4.64329	1.36535	41.306	53.6592	2.788	-0.134935	2.36811	1.36062	1	0	-0.130823	0.199877	19.9877	0	0
Senegal	2005	1	0	0.0561978	0.00981642	-0.260494	-0.254883	-0.0353757	-0.20401	43.0442	40.3	0.613208	-55.62	44.9834	-1.99163	-8.80497	-3.79	-0.0433431	-2.30303	0	-1.20812	-9.0823e-05	-0.0432523	1.13084	-3.0562	4.31024	1.52551	41.714	54.9032	2.703	4.72088	2.39067	1.37308	1	0	-0.131597	0.199634	19.9634	0	0
Senegal	2006	0	0	0.0617268	-0.221306	-0.368649	-0.365333	-0.373094	-0.264317	44.5591	43.4	0.649446	-55.17	44.7835	-1.99321	-8.87051	-3.72	-0.0408499	-2.24447	0	-1.17408	-0.000166591	-0.0406833	1.09245	-3.3187	2.33077	2.47771	42.124	54.1362	2.77	2.88549	1.95155	1.13061	0	0	-0.129525	0.200285	20.0285	0	0
Senegal	2007	0	0	-0.181714	-0.239804	-0.404349	-0.489185	-0.514299	-0.244919	45.7107	40	0.610316	-53.91	44.5835	-2.30348	-8.93605	-3.88	-0.0611471	-2.23212	0	-1.14703	-7.984e-05	-0.0610673	1.45668	-4.2627	2.82712	2.51146	42.535	59.2713	2.808	6.58871	1.93631	1.12219	0	0	-0.125257	0.201625	20.1625	0	0
Senegal	2008	1	0	-0.213503	-0.280424	-0.347913	-0.215513	-0.50016	-0.148591	45.6288	39.8	0.59885	-53.98	44.3835	-3.07243	-9.00475	-3.92	-0.185245	-2.18241	0	-1.02842	-3.73012e-05	-0.185208	1.29628	-4.9622	3.70317	2.70405	42.947	62.7618	2.822	8.21654	2.10218	1.21378	1	0	-0.113366	0.20536	20.536	0	0
Senegal	2009	0	0	-0.26909	-0.367224	-0.324281	-0.552715	-0.490049	-0.205201	54.6011	51.3	0.60147	-44.52	44.1836	-3.83445	-9.07082	-4.59	-0.499187	-2.16938	0	-1.15307	-0.000243201	-0.498944	1.20106	-5.6989	2.7521	2.053	43.359	52.3073	2.814	-1.68904	1.99489	1.15454	0	0	-0.0335363	0.230432	23.0432	0	0
Senegal	2010	1	0	-0.267737	-0.397503	-0.31757	-0.593583	-0.641386	-0.417925	51.0359	49.5	1.38882	-47.82	43.9836	-2.97597	-9.13689	-4.68	-0.384954	-1.97343	0	-1.25792	-0.000544233	-0.38441	0.954024	-6.6067	3.39089	1.68778	43.773	52.4579	2.803	1.60442	1.72007	1.0028	1	0	-0.0452413	0.226755	22.6755	0	0
Senegal	2011	0	0	-0.220193	-0.456046	-0.245334	-0.49634	-0.503729	-0.280602	50.5843	48	1.47826	-48.22	43.7758	-3.64959	-9.20296	-4.79	-0.566716	-1.977	0	-1.2879	-0.00182267	-0.564893	0.991429	-7.5697	1.33409	1.90107	44.188	57.5769	2.853	3.85747	1.65026	0.964249	0	0	-0.0295033	0.231698	23.1698	0	0
Senegal	2012	1	0	-0.00418914	-0.281967	-0.109142	-0.473695	-0.258423	-0.108322	52.8324	49.6	1.43101	-45.77	43.5681	-4.86398	-9.26903	-4.51	-1.5795	-1.87702	0	-1.3334	-0.00201873	-1.57748	1.00966	-8.0979	4.003	1.56368	44.603	61.9753	3.888	3.27411	1.72976	1.00815	1	0	0.010979	0.244412	24.4412	0	0
Senegal	2013	0	0	0.0599608	-0.236363	-0.0732259	-0.425884	-0.189073	-0.0607228	46.6042	42.7	1.42797	-52.22	43.3603	-3.42436	-9.3351	-4.07	-0.627885	-1.83828	0	-1.39239	-0.00736549	-0.620519	0.835195	-8.7957	2.41239	1.64582	45.019	60.6268	4.986	1.18613	1.79459	1.04394	0	0	-0.0653908	0.220427	22.0427	0	0
Senegal	2014	1	0	0.291608	-0.075783	-0.262088	-0.404591	0.0584493	-0.198223	43.9201	42.5	1.46185	-55.2	43.1525	-3.15695	-9.40117	-4.15	-0.400667	-1.8012	0	-1.48674	-0.00599982	-0.394667	1.29083	-9.7279	6.22407	2.03613	45.436	58.4425	5.841	-1.51586	1.75106	1.01991	1	0	-0.0784588	0.216323	21.6323	0	0
Senegal	2015	1	0	0.28286	-0.159371	-0.22444	-0.483362	0.0313068	-0.120225	37.6103	39.1	1.63358	-61.51	42.9448	-3.47912	-9.46724	-4.19	-0.460709	-1.69632	0	-1.86594	-0.00332723	-0.457382	1.28533	-11.2952	6.36704	2.30195	45.862	58.1103	6.757	1.06978	1.96325	1.13707	1	0	-0.0714729	0.218517	21.8517	0	0
Senegal	2016	1	0	0.369231	-0.123834	-0.210808	-0.502698	-0.0242784	-0.225955	35.772	36.7	1.63294	-63.21	42.737	-3.97964	-9.53331	-3.93	-0.961178	-1.57218	0	-1.96196	-0.0018494	-0.959328	1.60413	-12.8506	6.35607	2.4811	46.296	54.1082	4.455	0.95565	1.9008	1.10259	1	0	-0.0661721	0.220182	22.0182	0	0
Senegal	2017	1	0	0.316642	-0.17157	-0.195707	-0.365319	-0.11432	-0.0557226	37.4683	36.8	3.69585	-61.39	42.5293	-3.21233	-9.5915	-3.65	-0.460214	-1.4496	0	-1.79664	-0.00201233	-0.458202	1.00231	-12.8507	7.40749	2.80185	46.74	57.7053	4.078	0.598917	2.09175	1.20802	1	0	-0.0937747	0.211513	21.1513	0	0
Senegal	2018	1	0	0.220477	-0.224594	-0.147643	-0.329457	-0.0473761	-0.107358	36.9903	34.2	6.27113	-61.35	42.3215	-2.88655	-11.7279	-3.48	-0.873496	-1.29664	0	-1.77141	-0.0019471	-0.871549	0.960087	-13.7452	6.20924	3.66766	47.192	61.7898	3.455	-0.839644	2.02022	1.16853	1	0	-0.0971282	0.210459	21.0459	0	0
Senegal	2019	1	0	0.234765	-0.215208	-0.175264	-0.134314	-0.00357197	0.0375764	35.735	36.2	6.30778	-62.77	42.1137	-2.75988	-11.8667	-3.72	-0.981243	-1.19486	0	-1.9004	-0.00224128	-0.979001	1.24439	-14.3144	4.61363	4.55248	47.653	64.2363	2.863	2.0858	1.99411	1.15411	1	0	-0.0850412	0.214256	21.4256	0	0
Senegal	2020	0	0	0.239433	-0.320804	-0.294217	-0.059842	-0.00729533	-0.143103	41.9908	38.7	9.2338	-56.02	41.906	-2.86963	-11.8667	-3.55	-0.960784	-1.12148	0	-1.89433	-0.00147354	-0.959311	1.37994	-13.9667	1.34207	7.52396	48.122	60.0469	3.437	1.60273	1.87851	1.09028	0	0	-0.0724119	0.218222	21.8222	0	0
Singapore	2002	1	0	0.0586193	1.37724	1.88889	1.79351	2.26273	1.25357	1.84394	0.6	3.97756	-98.16	25.4204	-0.000433988	-338.245	-3.82	-0.0004428	-0.0847808	-0.0004428	-0.917466	0	0	0	-51.1653	3.92336	6.65367	100	349.746	5.65	-0.896916	-0.781838	-0.378664	1	0	-0.684086	0.0261155	2.61155	0	1
Singapore	2003	1	0	-0.0210195	1.53715	1.78525	1.92825	2.16917	0.876536	1.59597	0.6	3.90235	-98.4	25.0822	-0.000593717	-352.521	-4.42	-0.000609928	-0.0771135	-0.000609928	-0.843609	0	0	0	-49.57	4.54826	17.4624	100	377.219	5.93	-1.79905	-0.932737	-0.461984	1	0	-0.682691	0.0265538	2.65537	0	1
Singapore	2004	1	0	0.0775112	1.6381	1.76228	2.01585	2.30115	1.09296	1.28636	0.5	3.74557	-98.71	25.1149	-0.000555645	-366.797	-4.83	-0.000591419	-0.0707173	-0.000591419	-0.808786	0	0	0	-52.2315	9.93998	21.2027	100	401.524	5.84	3.95953	-0.801827	-0.389701	1	0	-0.685595	0.0256416	2.56416	0	1
Singapore	2005	1	0	0.132439	1.69587	1.74681	1.998	2.1561	1.15335	1.87647	0.5	3.60814	-98.12	25.2205	-0.000547061	-377.517	-3.08	-0.000531538	-0.0697118	-0.000347636	-0.712018	-0.000183903	0	0.418808	-50.0898	7.36632	15.1134	100	420.431	5.59	1.90052	-0.753078	-0.362783	1	0	-0.767239	0	0	0	1
Singapore	2006	1	0	-0.387193	1.5739	1.75363	2.24887	2.17492	1.24849	1.74302	0.5	3.49572	-98.26	25.1435	-0.00365545	-346.289	-3.03	-0.00309656	-0.0657197	-0.000332647	-0.630397	-0.00276391	0	0.36738	-50.3589	9.00677	26.3272	100	425.363	4.48	1.84418	-0.503269	-0.224848	1	0	-0.737807	0.0092437	0.924373	0	1
Singapore	2007	1	0	-0.36321	1.59572	1.80887	2.40786	2.23121	1.17421	1.9292	0.5	3.352	-98.07	25.2119	-0.00685518	-315.061	-2.57	-0.00591842	-0.0648423	-0.000405842	-0.5597	-0.00551258	0	0.318558	-50.9274	9.02152	26.162	100	394.288	3.9	5.91682	-0.528407	-0.238728	1	0	-0.721723	0.0142951	1.42951	0	1
Singapore	2008	0	0	-0.334835	1.59489	1.86874	2.46966	2.23162	1.34468	1.8012	0.5	3.30572	-98.2	25.1357	-0.0253866	-284.456	-2.9	-0.022305	-0.0679195	-0.000644429	-0.552901	-0.0216605	0	0.311636	-50.2121	1.86348	7.02329	100	437.327	3.96	-1.38156	-0.427714	-0.183129	0	0	-0.675871	0.0286957	2.86957	0	1
Singapore	2009	0	0	-0.23422	1.55884	1.77574	2.30715	2.20672	1.17959	1.65334	0.5	2.77228	-98.3	25.2396	-0.00678567	-252.184	-3.13	-0.00620565	-0.0712499	-0.000609159	-0.58256	-0.0055965	0	0.268029	-51.2074	0.127953	12.0711	100	358.193	5.86	2.95392	-0.386752	-0.160512	0	0	-0.631781	0.0425429	4.25429	0	1
Singapore	2010	1	0	-0.208966	1.61885	1.7836	2.28113	2.17136	1.16941	2.38188	0.5	3.27739	-97.57	25.2712	-0.0385122	-219.911	-2.55	-0.0331881	-0.0594424	-0.000458166	-0.510923	-0.0327299	0	0.209585	-57.8124	14.5197	23.0695	100	369.686	4.12	1.10781	-0.290785	-0.107522	1	0	-0.615375	0.0476953	4.76953	0	1
Singapore	2011	1	0	-0.102027	1.66075	1.78323	2.19382	2.103	1.19142	2.8486	0.5	3.36994	-97.19	24.8389	-0.154301	-187.639	-2.13	-0.135046	-0.0626173	-0.000532406	-0.495053	-0.134514	0	0.189289	-60.2091	6.21493	17.596	100	379.099	3.89	1.1708	-0.375942	-0.154543	1	0	-0.589776	0.0557353	5.57353	0	0
Singapore	2012	1	0	0.0530914	1.72408	1.9579	2.20259	2.11571	1.36817	2.36444	0.5	3.37322	-97.58	24.4091	-0.143294	-160.033	-2.37	-0.126383	-0.0667134	-0.000413795	-0.481425	-0.125969	0	0.176614	-58.3517	4.4355	18.7435	100	369.213	3.72	0.495346	-0.520757	-0.234504	1	0	-0.55401	0.066968	6.69679	0	0
Singapore	2013	1	0	0.0366793	1.69726	1.96011	2.12807	2.07047	1.37818	2.35274	0.6	3.85062	-97.6	24.0156	-0.119459	-132.428	-2.54	-0.101049	-0.0705388	-0.000356772	-0.487753	-0.100692	0	0.161925	-61.7763	4.81763	20.9345	100	367.042	3.86	-0.431059	-0.233303	-0.0757831	1	0	-0.519091	0.0779351	7.79351	0	0
Singapore	2014	1	0	-0.09882	1.82067	2.22636	2.21747	2.06743	1.18627	2.53253	0.6	4.03467	-97.74	23.5898	-0.104879	-108.506	-2.68	-0.0894269	-0.0708801	-0.000508153	-0.491934	-0.0889188	0	0.168568	-63.6761	3.93554	21.8185	100	360.467	3.74	-0.26727	-0.15689	-0.0335903	1	0	-0.489328	0.0872825	8.72825	0	0
Singapore	2015	0	0	-0.161714	1.77914	2.25224	2.2487	2.05113	1.29889	2.33767	0.7	4.17967	-97.88	23.2319	-0.0343912	-84.5833	-2.74	-0.0303415	-0.0745953	-0.000410765	-0.550451	-0.0299307	0	0.232687	-65.5123	2.9768	22.6542	100	329.471	3.79	3.07196	-0.141955	-0.0253439	0	0	-0.463829	0.0952911	9.52911	0	0
Singapore	2016	1	0	-0.149904	1.78623	2.17064	2.21462	2.04224	1.47747	2.37131	0.7	4.59046	-97.79	22.9697	-0.029354	-84.9667	-2.73	-0.0257285	-0.0733917	-0.0004514	-0.553148	-0.0252771	0	0.249417	-63.6417	3.74758	20.3766	100	302.84	4.08	0.52202	-0.0495599	0.0256731	1	0	-0.465304	0.0948276	9.48276	0	0
Singapore	2017	1	0	-0.168807	1.78575	2.10915	2.22598	2.08878	1.59913	2.17156	0.7	4.27901	-97.96	22.6264	-0.000452889	-83.2167	-2.77	-0.000489915	-0.071746	-0.000489915	-0.579556	0	0	0.272335	-68.8638	4.4769	29.6706	100	316.794	4.2	2.86329	-0.181643	-0.0472581	1	0	-0.464193	0.0951767	9.51767	0	0
Singapore	2018	1	0	-0.0758846	1.8029	2.12174	2.23177	2.13473	1.46826	2.08568	0.8	4.11612	-97.89	22.3109	-0.000188767	-81.3833	-2.47	-0.000214886	-0.0773957	-0.000214886	-0.560752	0	0	0.249897	-66.8512	3.45198	22.1184	100	326.597	3.613	3.60726	-0.337819	-0.133493	1	0	-0.474851	0.0918293	9.18293	0	0
Singapore	2019	0	0	-0.206007	1.83805	2.15444	2.23167	2.12004	1.48045	2.12531	0.9	4.17542	-97.95	21.9972	-0.000169266	-82.1667	-2.61	-0.000193451	-0.0804923	-0.000193451	-0.588104	0	0	0.276338	-69.3423	1.30804	28.3316	100	324.395	3.1	-0.424899	-0.111963	-0.0087838	0	0	-0.470621	0.0931579	9.31579	0	0
Singapore	2020	0	1	-0.203882	1.83543	2.2053	2.2842	2.11823	1.43851	1.99436	0.9	4.08103	-98.04	21.6852	-0.000242072	-83.1167	-2.71	-0.000279492	-0.0865598	-0.000279492	-0.625349	0	0	0.239795	-67.8303	-3.81471	22.8411	100	332.041	4.1	-2.3929	-0.138856	-0.0236326	0	1	-0.467695	0.0940768	9.40768	0	0
Slovak Republic	2002	1	0	0.976482	0.28569	0.903906	0.540846	-0.0506339	0.94003	1.77936	5.5	17.3775	-72.45	39.599	-0.257191	-8.68571	-8.38	-0.0191766	-0.170626	0	-2.17889	-0.0182483	-0.000928356	2.24293	-42.4767	4.41725	11.9523	56.013	120.599	18.541	4.04624	-0.742228	-0.356792	1	0	-0.0322952	0.230821	23.0821	0	0
Slovak Republic	2003	1	0	0.931505	0.331789	0.913024	0.668066	0.280685	0.947933	1.97497	5.3	12.1015	-72.19	39.625	-0.256611	-8.18968	-7.91	-0.0168767	-0.176692	0	-1.80348	-0.0164371	-0.000439559	2.45585	-43.7596	4.8567	2.07911	55.863	125.999	17.549	5.44608	-1.18165	-0.599423	1	0	-0.0709932	0.218668	21.8667	0	0
Slovak Republic	2004	1	0	0.947525	0.464086	1.08342	0.817942	0.337021	0.593536	2.21631	6.2	13.8483	-72.22	39.6676	-0.30047	-7.69365	-7.39	-0.0317054	-0.167692	0	-1.49497	-0.0310319	-0.000673424	2.49681	-43.4321	5.3895	7.1021	55.713	140.222	18.206	5.9053	-0.990071	-0.493642	1	0	-0.0974199	0.210368	21.0368	0	0
Slovak Republic	2005	1	0	0.899957	0.490571	1.12677	0.877272	0.451421	0.898073	2.39851	6.3	15.1931	-72.12	39.7019	-0.320444	-7.19762	-7.11	-0.0205822	-0.168737	0	-1.46417	-0.0183389	-0.00224331	2.39029	-47.3975	6.48493	6.27282	55.563	148.705	16.276	2.64657	-1.10098	-0.554883	1	0	-0.10543	0.207852	20.7852	0	0
Slovak Republic	2006	1	0	0.931123	0.488394	1.08478	0.8281	0.375257	0.784179	2.62222	6.6	15.819	-70.9	39.7362	-0.295366	-6.32857	-6.49	-0.0248396	-0.154175	0	-1.3498	-0.0211967	-0.00364291	2.28436	-44.6332	8.92569	8.05836	55.412	164.992	13.395	2.89554	-1.47164	-0.759548	1	0	-0.128102	0.200732	20.0732	0	0
Slovak Republic	2007	1	0	0.947436	0.428629	0.974188	0.690661	0.296646	1.03669	3.38324	8.2	18.1708	-70.93	39.7705	-0.320032	-5.45952	-5.61	-0.0226222	-0.144469	0	-1.13791	-0.016675	-0.00594713	2.12288	-44.1351	10.8186	5.84174	55.261	166.58	11.16	1.17773	-1.71349	-0.893085	1	0	-0.160508	0.190554	19.0554	0	0
Slovak Republic	2008	1	0	0.935453	0.527956	1.07833	0.849099	0.312199	1.08214	3.46543	7.6	16.4537	-70.34	39.8048	-0.384452	-5.26746	-5.45	-0.0410293	-0.14664	0	-1.00414	-0.0365029	-0.00452646	2.05404	-45.0059	5.36338	4.60269	55.111	162.464	9.514	2.98536	-1.54733	-0.801339	1	0	-0.170709	0.18735	18.735	0	0
Slovak Republic	2009	0	1	0.876307	0.534014	1.04804	0.861253	0.26557	0.920497	4.77897	10	19.6772	-70.03	39.8474	-0.269772	-4.98492	-5.27	-0.0152814	-0.149968	0	-1.05313	-0.0140629	-0.00121847	1.9638	-40.8949	-5.50534	1.70252	54.96	136.714	12.023	-1.12257	-1.7723	-0.925558	0	1	-0.169158	0.187837	18.7837	0	0
Slovak Republic	2010	1	0	0.910946	0.563034	0.999186	0.781369	0.248165	1.05332	8.71343	10.3	22.7365	-67.52	39.8809	-0.337208	-4.76746	-5.26	-0.0321723	-0.13886	0	-1.13428	-0.0217627	-0.0104095	2.05325	-44.5675	6.79058	2.32223	54.685	155.108	14.387	0.470529	-1.95389	-1.02583	1	0	-0.154918	0.19231	19.231	0	0
Slovak Republic	2011	0	0	0.965979	0.597755	0.999639	0.776584	0.229636	0.974757	9.07461	10.4	18.7297	-65.97	39.8993	-0.359868	-4.70714	-4.98	-0.0380879	-0.13862	0	-1.05491	-0.0269934	-0.0110946	2.39138	-42.4715	2.56242	5.44766	54.42	169.178	13.634	1.61977	-1.7635	-0.920698	0	0	-0.172894	0.186664	18.6664	0	0
Slovak Republic	2012	0	0	0.973017	0.485912	1.04091	0.781548	0.0692805	1.0884	10.0904	10.5	20.2693	-63.96	39.9153	-0.325158	-5.28016	-4.72	-0.0309478	-0.131421	0	-1.08023	-0.0170762	-0.0138716	2.34513	-39.0372	1.56917	1.87551	54.28	176.969	13.966	1.33888	-1.33536	-0.6843	0	0	-0.177635	0.185175	18.5175	0	0
Slovak Republic	2013	0	0	0.959502	0.463768	0.92778	0.725381	0.0489007	1.11952	9.94461	10.7	23.1375	-63.81	39.9313	-0.296935	-5.05873	-4.78	-0.0187044	-0.122329	0	-1.08357	-0.00988189	-0.00882249	2.48323	-38.7123	0.703324	1.01267	54.14	180.903	14.226	0.534062	-1.19756	-0.60821	0	0	-0.173889	0.186351	18.6351	0	0
Slovak Republic	2014	0	0	0.959564	0.485068	0.885452	0.793423	0.121957	1.03912	9.33586	12.2	23.6561	-62.49	39.9539	-0.288569	-4.43889	-4.38	-0.0146773	-0.118734	0	-1.02193	-0.00658132	-0.00809599	2.51536	-38.1482	2.70795	-0.356803	54	176.756	11.536	-0.132603	-1.06078	-0.532686	0	0	-0.187747	0.181999	18.1999	0	0
Slovak Republic	2015	1	0	0.965467	0.466484	0.772586	0.736977	0.109913	0.865759	11.6036	13.4	23.4584	-61.41	39.9682	-0.263025	-4.55238	-4.28	-0.01301	-0.119976	0	-1.23282	-0.00416814	-0.0088419	2.46291	-38.5206	5.17688	1.70487	53.889	179.426	11.492	-0.185693	-1.09739	-0.552899	1	0	-0.178406	0.184933	18.4933	0	0
Slovak Republic	2016	0	0	0.961436	0.597049	0.876968	0.793483	0.152081	0.708231	11.6888	13.1	25.4064	-61.74	40.0035	-0.26167	-4.40714	-4.22	-0.0121063	-0.111188	0	-1.29158	-0.00329646	-0.00880985	2.44948	-39.4081	1.94782	5.27771	53.806	182.757	9.679	-0.390909	-1.11268	-0.561343	0	0	-0.176307	0.185592	18.5592	0	0
Slovak Republic	2017	0	0	0.912069	0.513248	0.812015	0.666439	0.0974163	0.902731	11.1245	12.4	24.6269	-62.99	40.0562	-0.333117	-4.41508	-4.33	-0.0132107	-0.111738	0	-1.33772	-0.00513708	-0.00807359	2.50083	-41.749	2.87473	4.39986	53.751	186.645	8.142	1.18187	-1.05295	-0.528359	0	0	-0.173019	0.186625	18.6625	0	0
Slovak Republic	2018	1	0	0.847067	0.47287	0.798312	0.581321	0.230297	0.736686	10.5737	12.4	22.5983	-63.57	40.0562	-0.289203	-4.41667	-4.14	-0.0120476	-0.115267	0	-1.23762	-0.00408363	-0.007964	2.44135	-42.2487	4.06212	2.1127	53.726	188.733	6.544	2.10865	-1.07428	-0.540141	1	0	-0.187277	0.182147	18.2147	0	0
Slovak Republic	2019	0	0	0.861327	0.500033	0.997581	0.549659	0.187729	0.667369	11.3166	17.6	24.1225	-61.64	40.0562	-0.251989	-4.43333	-3.98	-0.00948771	-0.123213	0	-1.22832	-0.00362892	-0.00585879	2.47188	-38.959	2.2759	2.15395	53.729	183.723	5.761	2.40121	-0.909005	-0.44888	0	0	-0.184446	0.183036	18.3036	0	0
Slovak Republic	2020	0	1	0.879535	0.655499	0.774733	0.502146	0.415226	0.633982	11.3203	17.6	24.7555	-61.16	40.0562	-0.219233	-4.40476	-3.99	-0.00778039	-0.129094	0	-1.16228	-0.00125437	-0.00652602	2.41398	-34.7562	-2.58551	-1.05976	53.76	167.534	6.719	2.40778	-1.05797	-0.531134	0	1	-0.185827	0.182602	18.2602	0	0
Slovenia	2002	0	0	1.13046	0.88309	0.851863	0.789837	0.773913	1.30383	7.85192	16.3	23.3906	-68.66	61.3605	-0.137442	-4.81628	-5.19	-0.11927	-0.143735	-0.113985	-1.34325	-0.00528492	0	3.29601	-15.5399	3.28258	7.96826	50.857	104.88	5.922	7.61981	3.07889	1.75308	0	0	-0.0841644	0.214531	21.4531	0	0
Slovenia	2003	0	0	1.12496	0.8494	0.88174	0.897875	0.898587	1.18649	8.67551	16.9	22.2814	-68.25	61.43	-0.144377	-4.85985	-5.12	-0.126612	-0.133903	-0.1222	-1.10442	-0.00441205	0	3.34538	-15.6588	3.19503	1.82421	51.082	103.28	6.479	5.66346	2.92531	1.66829	0	0	-0.0951155	0.211092	21.1091	0	0
Slovenia	2004	1	0	1.11239	0.913738	0.844686	0.901355	1.0158	1.08161	8.40107	17.8	27.6022	-68.01	61.4995	-0.234121	-4.90341	-5.05	-0.133571	-0.138217	-0.10101	-1.02075	-0.0325605	0	3.35607	-16.1069	4.54602	2.23412	51.308	112.4	6.012	3.35817	3.19028	1.81459	1	0	-0.0930499	0.21174	21.174	0	0
Slovenia	2005	1	0	1.09229	0.883542	0.883193	0.885157	0.902104	1.09281	9.56831	18.6	23.6489	-66.42	61.569	-0.184333	-4.94697	-5.04	-0.11906	-0.126255	-0.0993206	-1.03272	-0.0197393	0	3.22645	-16.2617	3.85413	2.70057	51.533	121.127	6.506	1.503	3.19081	1.81488	1	0	-0.0931262	0.211716	21.1716	0	0
Slovenia	2006	1	0	1.06961	0.899841	0.79479	0.954628	1.02647	1.08573	8.59159	17.4	24.4992	-67.88	61.6385	-0.211639	-4.97858	-4.74	-0.144278	-0.120922	-0.124391	-1.02471	-0.0198872	0	3.02459	-16.3714	5.90878	1.76265	51.758	130.518	5.95	2.2236	3.06755	1.74682	1	0	-0.103433	0.208479	20.8479	0	0
Slovenia	2007	1	0	1.06297	0.945623	0.800101	0.888731	1.01	1.09863	9.40057	18.4	22.465	-66.99	61.708	-0.231396	-5.01018	-4.49	-0.140179	-0.111934	-0.112712	-0.892759	-0.0274664	0	2.98985	-15.9692	7.13923	3.93587	51.983	137.663	4.818	4.20025	3.17914	1.80844	1	0	-0.116344	0.204425	20.4424	0	0
Slovenia	2008	1	0	1.01736	1.00785	0.847147	1.11381	0.939397	1.14937	9.37805	17.6	26.2675	-67.48	61.7585	-0.393053	-5.57043	-4.57	-0.180787	-0.0929008	-0.111559	-0.857711	-0.0692278	0	2.95624	-16.8346	3.37224	1.94696	52.209	135.387	4.371	4.50501	3.3219	1.88727	1	0	-0.108117	0.207008	20.7008	0	0
Slovenia	2009	0	1	1.05512	1.0689	0.913787	1.14304	1.05152	0.936906	9.95431	19.6	29.9126	-67.08	61.8293	-0.206333	-5.04928	-4.43	-0.124354	-0.103718	-0.102351	-0.861361	-0.0220029	0	3.64419	-14.6435	-7.59059	-0.694282	52.433	114.482	5.858	2.73284	3.15074	1.79276	0	1	-0.11708	0.204193	20.4193	0	0
Slovenia	2010	0	0	1.04864	1.00198	0.759356	1.01479	0.917391	0.866509	10.2744	20.1	30.0111	-66.48	61.8975	-0.300599	-4.95715	-4.49	-0.147993	-0.0991643	-0.102973	-0.94801	-0.0450206	0	3.7404	-14.8376	1.11214	0.667761	52.658	128.607	7.236	-0.491469	3.16218	1.79907	0	0	-0.107977	0.207052	20.7052	0	0
Slovenia	2011	0	0	1.05692	1.04521	0.692796	0.976926	0.941719	0.96921	10.2432	19.1	25.0618	-64.68	61.9081	-0.3599	-4.55437	-4.45	-0.188644	-0.0846408	-0.137525	-0.920347	-0.0511196	0	3.7125	-13.8702	0.655438	1.71086	52.883	140.332	8.166	1.36452	3.17042	1.80363	0	0	-0.111315	0.206004	20.6004	0	0
Slovenia	2012	0	1	0.999778	1.00907	0.625475	1.01832	0.832159	0.935111	10.5415	20.2	28.701	-64.96	61.9189	-0.252705	-4.97054	-4.38	-0.168092	-0.0805972	-0.145983	-1.02457	-0.0221096	0	4.10269	-13.313	-2.91554	0.0726446	53.108	143.656	8.841	0.626619	3.43954	1.95222	0	1	-0.111078	0.206078	20.6078	0	0
Slovenia	2013	0	1	1.00186	0.994513	0.62496	1.00099	0.722198	0.882252	11.3894	22.5	33.5634	-63.67	61.9464	-0.206401	-6.18961	-4.31	-0.157269	-0.0791018	-0.146146	-0.984628	-0.0111228	0	4.51979	-14.874	-0.823776	0.217316	53.332	145.169	10.103	1.1328	3.37294	1.91545	0	1	-0.11167	0.205892	20.5892	0	0
Slovenia	2014	0	0	0.95607	0.999712	0.65777	0.996188	0.721584	0.965773	10.4213	22.9	39.4852	-59.66	61.9563	-0.264571	-5.25067	-4.08	-0.230328	-0.0744524	-0.22344	-0.891075	-0.00688789	0	4.46056	-19.2625	2.76283	2.05875	53.557	146.472	9.668	0.631551	3.45653	1.96161	0	0	-0.107974	0.207053	20.7053	0	0
Slovenia	2015	0	0	0.986833	0.945756	0.609881	0.9368	0.737132	0.947492	11.4429	21.4	30.7115	-60.69	61.9582	-0.263849	-4.8045	-3.94	-0.240998	-0.0677242	-0.235405	-1.09367	-0.00559354	0	4.64088	-19.6043	2.39331	4.05097	53.781	147.218	8.962	0.867198	3.47772	1.97331	0	0	-0.116165	0.204481	20.4481	0	0
Slovenia	2016	0	0	1.0109	1.0506	0.62783	1.08712	0.784757	0.979142	11.0114	21	32.3426	-62.32	61.8593	-0.261246	-4.75254	-3.94	-0.235165	-0.0576831	-0.228629	-1.14405	-0.00653557	0	4.68471	-20.4886	3.03441	3.26541	54.02	148.238	8	0.885482	3.50286	1.98719	0	0	-0.115807	0.204593	20.4593	0	0
Slovenia	2017	1	0	1.00673	0.993279	0.564626	1.12924	0.776858	0.866365	10.6022	19.7	28.9136	-61.32	61.77	-0.268546	-4.98875	-3.86	-0.233473	-0.0595532	-0.225138	-1.1073	-0.00833526	0	4.48162	-20.8391	5.1744	2.48421	54.273	158.702	6.564	1.28763	3.54004	2.00771	1	0	-0.123291	0.202243	20.2243	0	0
Slovenia	2018	1	0	0.970165	1.02448	0.642297	1.08224	0.835979	0.894267	10.6337	20.6	33.2074	-61.91	61.6744	-0.26179	-5.1473	-3.66	-0.227196	-0.0626497	-0.217189	-1.03283	-0.0100073	0	4.23469	-20.7952	4.37908	2.8649	54.541	162.613	5.108	2.18095	3.56168	2.01966	1	0	-0.127246	0.201	20.1	0	0
Slovenia	2019	1	0	0.977373	1.085	0.997022	1.04178	0.88842	0.801586	10.936	20.9	32.5658	-60.99	61.5731	-0.234371	-5.05624	-3.48	-0.205589	-0.057047	-0.19942	-1.03661	-0.00616866	0	4.02342	-15.7532	3.50525	3.99099	54.822	160.044	4.446	2.33859	3.53418	2.00448	1	0	-0.132538	0.199338	19.9338	0	0
Slovenia	2020	0	1	0.93214	1.03955	0.91221	1.12117	0.777403	0.701468	11.312	22.7	34.1666	-58.34	61.4723	-0.214172	-5.37225	-3.44	-0.184391	-0.0600836	-0.179635	-0.993773	-0.00475669	0	3.54074	-14.6446	-4.085	0.948341	55.118	147.549	4.971	1.18953	3.56426	2.02109	0	1	-0.126621	0.201197	20.1197	0	0
South Africa	2002	1	0	0.659822	0.0273917	0.733768	0.607831	0.332902	-0.25479	9.14719	13.3	1.87427	-88.26	14.5952	-4.67923	-29.3721	-7.94	-2.51335	-0.79791	0	-5.28667	-1.83328	-0.680078	1.57364	-466.736	3.70037	1.14636	57.898	53.4655	22.547	12.538	0.853868	0.524512	1	0	0.129049	0.281494	28.1494	0	0
South Africa	2003	0	0	0.700217	0.0375993	0.819586	0.59958	0.275541	-0.312843	7.68034	11.8	1.7418	-90.29	14.5652	-2.99087	-29.8472	-8.64	-1.44415	-0.761475	0	-3.85604	-1.31869	-0.125459	1.55799	-484.565	2.94908	0.397493	58.446	45.7239	22.629	6.39576	1.05726	0.636818	0	0	0.0326165	0.251208	25.1208	0	0
South Africa	2004	1	0	0.715737	0.00451627	0.692467	0.55914	0.397753	-0.13173	6.75248	11	1.94552	-91.29	14.5352	-4.77964	-30.3223	-9.01	-2.67612	-0.697471	0	-3.33346	-2.46257	-0.213546	1.59273	-528.413	4.55456	0.2742	58.993	45.6436	22.538	6.04217	1.1484	0.687144	1	0	0.101374	0.272802	27.2802	0	0
South Africa	2005	1	0	0.64901	-0.0119513	0.715097	0.567058	0.483857	-0.162092	6.9329	9.7	1.87488	-91.39	14.5052	-4.56849	-30.7974	-8.22	-2.66553	-0.64121	0	-3.09463	-2.16148	-0.504055	1.55575	-557.71	5.27705	2.25782	59.536	47.4278	22.461	5.59701	1.3644	0.80641	1	0	0.0542713	0.258009	25.8009	0	0
South Africa	2006	1	0	0.651613	0.18131	0.746973	0.325101	0.378271	0.0470301	6.58915	9.3	2.15546	-92.02	14.4752	-5.2274	-31.2725	-7.93	-3.02874	-0.598136	0	-3.11788	-2.28425	-0.744489	1.53306	-561.941	5.60381	0.205126	60.077	53.7681	22.324	6.06464	1.25431	0.745622	1	0	0.0644888	0.261218	26.1218	0	0
South Africa	2007	1	0	0.578765	0.000255581	0.595666	0.283431	0.197672	0.215347	5.85058	8.7	1.73369	-92.79	14.4452	-6.36571	-31.7476	-8.18	-3.75903	-0.559675	0	-3.1628	-2.72635	-1.03268	1.44348	-577.729	5.36047	1.97756	60.616	57.1251	22.287	8.24576	1.19286	0.711692	1	0	0.116479	0.277546	27.7546	0	0
South Africa	2008	0	0	0.575648	0.00541776	0.656967	0.332179	0.153829	0.049529	5.36317	9.7	1.64048	-93.08	14.4152	-11.9901	-32.2227	-8.59	-7.01572	-0.540981	0	-3.72823	-5.42598	-1.58973	1.22598	-618.723	3.19104	3.12687	61.154	65.9745	22.407	7.85033	1.38116	0.815662	0	0	0.36859	0.356726	35.6726	0	0
South Africa	2009	0	1	0.570526	0.0724231	0.449182	0.310808	0.125427	-0.114493	4.94375	9.2	1.75401	-93.27	14.3852	-4.93797	-32.6978	-8.84	-2.69268	-0.513924	0	-3.45469	-1.89605	-0.796623	1.36092	-566.495	-1.53809	2.31217	61.687	49.5875	23.523	8.66304	1.25961	0.748547	0	1	0.0887837	0.268848	26.8848	0	0
South Africa	2010	0	0	0.60209	0.0977495	0.445573	0.191702	0.0653931	-0.029427	4.91261	9.4	1.94127	-93.35	14.3552	-6.84683	-33.1729	-7.98	-4.02016	-0.483411	0	-2.97009	-2.60164	-1.41852	1.52457	-581.397	3.03973	0.884905	62.218	50.4061	24.683	6.12843	1.27729	0.758309	0	0	0.110395	0.275636	27.5636	0	0
South Africa	2011	0	0	0.590839	0.129663	0.446406	0.21756	-0.00423371	0.0240316	4.71674	9	1.9991	-93.34	14.3251	-7.81466	-33.648	-7.87	-4.68498	-0.446251	0	-2.72806	-3.17021	-1.51477	1.59361	-554.858	3.16856	0.903381	62.746	54.6364	24.639	5.53906	1.27456	0.7568	0	0	0.135207	0.283428	28.3428	0	0
South Africa	2012	0	0	0.582153	0.0844442	0.398662	0.170115	-0.184171	-0.0253867	4.89047	8.3	1.80765	-93.57	14.2951	-6.40436	-34.1231	-7.35	-3.80465	-0.441715	0	-3.13094	-2.61117	-1.19348	1.67463	-574.901	2.39623	1.06492	63.272	55.5826	24.727	4.68521	1.23199	0.733294	0	0	0.0786413	0.265663	26.5663	0	0
South Africa	2013	0	0	0.600655	0.135301	0.380482	0.306021	-0.138075	-0.0462945	4.93044	7.8	1.73566	-93.03	14.2651	-6.11153	-31.8884	-7.12	-3.70365	-0.440664	0	-3.61038	-2.35603	-1.34761	1.72249	-578.229	2.48547	2.05358	63.793	58.875	24.561	5.84411	1.13941	0.68218	0	0	0.0799054	0.26606	26.606	0	0
South Africa	2014	0	0	0.640297	0.155199	0.230834	0.165044	-0.125287	-0.146389	4.33775	7.6	2.14259	-93.51	14.2351	-4.66573	-36.7701	-7.43	-2.70808	-0.444812	0	-4.05712	-1.78972	-0.91836	1.75221	-599.319	1.41383	1.51933	64.312	59.4996	24.89	5.36655	1.15496	0.690762	0	0	0.0474089	0.255854	25.5854	0	0
South Africa	2015	0	0	0.648553	0.015778	0.208594	0.0873291	-0.0708397	-0.220545	4.24703	7.6	2.67115	-93.49	14.2051	-2.80795	-41.6518	-6.93	-1.26249	-0.428543	0	-4.36048	-1.02143	-0.241064	1.85425	-562.062	1.32186	0.438736	64.828	56.7267	25.149	5.54553	0.989061	0.599161	0	0	-0.042011	0.22777	22.777	0	0
South Africa	2016	0	0	0.648331	0.0435599	0.119783	0.101403	0.0170263	-0.149085	3.77079	7.8	3.1019	-93.58	14.1751	-3.5616	-42.5223	-7.14	-1.67131	-0.409182	0	-4.84229	-1.17687	-0.49444	1.84807	-548.303	0.664552	0.684613	65.341	55.8613	26.536	6.95217	1.0735	0.645785	0	0	0.00736	0.243276	24.3276	0	0
South Africa	2017	0	0	0.630275	-0.156248	0.138878	0.0707959	-0.127773	-0.284804	4.01696	7.9	4.18105	-93.35	14.1451	-3.83559	-43.2589	-7.02	-1.79546	-0.402238	0	-4.39524	-1.43355	-0.361909	1.93521	-575.057	1.15795	0.539674	65.85	53.5359	27.035	5.47332	0.984184	0.596468	0	0	-0.0019118	0.240364	24.0364	0	0
South Africa	2018	0	0	0.637234	-0.221828	-0.0407782	0.103647	-0.136797	-0.237547	3.9943	8	4.87685	-93.45	14.1151	-3.86949	-43.8393	-6.72	-1.9406	-0.389944	0	-4.33152	-1.67808	-0.262513	1.95751	-579.824	1.55678	1.37429	66.355	54.4855	26.906	3.9933	0.875844	0.536647	0	0	-0.0065714	0.2389	23.89	0	0
South Africa	2019	0	0	0.643926	-0.188337	0.00850539	0.127971	-0.031281	-0.283221	3.61645	8.7	5.24124	-93.52	14.0851	-4.18782	-44.6429	-6.72	-2.04972	-0.388206	0	-4.73225	-1.35373	-0.69599	2.01662	-579.573	0.259936	1.31408	66.856	53.898	28.468	4.61352	0.931427	0.567337	0	0	0.0096566	0.243997	24.3997	0	0
South Africa	2020	0	1	0.690294	-0.243994	0.0204948	0.0465345	-0.0594757	-0.252867	3.62651	9.8	6.01192	-93.65	14.0551	-4.01778	-45.3348	-6.9	-2.12323	-0.400312	0	-5.18128	-1.09808	-1.02515	1.9183	-513.423	-6.16892	0.933074	67.354	50.7597	29.217	5.39139	0.958001	0.58201	0	1	0.0278544	0.249712	24.9712	0	0
Spain	2002	0	0	1.27499	1.22893	1.32903	1.78612	1.31683	0.438226	3.36543	7.4	15.6015	-81.39	34.8353	-0.0459379	-31.9308	-3.56	-0.00858911	-0.0764166	0	-0.89946	-0.0067415	-0.00184761	1.96774	-367.349	2.75546	5.55192	76.533	55.1021	11.146	4.0917	1.77575	1.03354	0	0	-0.293293	0.148851	14.8851	0	0
Spain	2003	0	0	1.27056	1.24776	1.3043	1.81681	1.34891	-0.0474859	3.57094	8.9	22.6984	-80.76	35.1142	-0.03768	-32.5093	-3.58	-0.0035183	-0.0736569	0	-0.74396	-0.00261268	-0.000905624	1.94535	-377.601	2.93929	3.38614	76.778	53.4358	11.283	4.00397	1.82353	1.05992	0	0	-0.288363	0.150399	15.0399	0	0
Spain	2004	0	0	1.32361	1.12897	1.30675	1.33227	1.33719	-0.0905463	3.50546	8	19.1063	-81.77	35.4071	-0.0468984	-33.0878	-3.62	-0.00487702	-0.0684454	0	-0.699023	-0.00387032	-0.0010067	1.90778	-393.144	3.11453	2.36189	77.022	54.4795	11.09	3.91167	1.83399	1.0657	0	0	-0.292954	0.148957	14.8957	0	0
Spain	2005	1	0	1.1314	1.11755	1.30438	1.50157	1.32762	0.193027	3.6172	7.3	15.9486	-83.41	35.7043	-0.036513	-33.6664	-3.57	-0.00388639	-0.065833	0	-0.716727	-0.00206914	-0.00181725	1.8545	-407.556	3.55123	2.33901	77.263	54.6992	9.146	4.21292	1.78069	1.03627	1	0	-0.298366	0.147257	14.7257	0	0
Spain	2006	1	0	1.07872	1.11988	1.17665	0.830168	1.17767	-0.150649	3.59387	8.5	18.7094	-82.5	36.003	-0.0437611	-32.5598	-3.42	-0.00802911	-0.0612462	0	-0.677538	-0.0017123	-0.00631682	1.78581	-397.507	4.04344	2.6095	77.502	56.0839	8.452	4.07249	1.81415	1.05475	1	0	-0.297578	0.147505	14.7505	0	0
Spain	2007	1	0	1.12309	1.15381	1.21525	0.987038	1.07903	-0.276732	3.80663	9	20.1611	-83.13	36.2844	-0.0522545	-31.4532	-3.35	-0.0133141	-0.0569854	0	-0.635273	-0.00186057	-0.0114535	1.73126	-417.456	3.5335	4.62027	77.74	57.6269	8.232	3.56123	1.8032	1.04869	1	0	-0.296409	0.147872	14.7872	0	0
Spain	2008	0	0	1.18533	1.18375	1.25489	0.912503	1.17877	-0.383085	4.10395	9.7	20.6921	-81.75	36.598	-0.0651769	-31.277	-3.21	-0.0059644	-0.0547148	0	-0.548523	-0.00337825	-0.00258615	1.59264	-382.436	0.767166	4.52833	77.976	55.8281	11.254	2.45204	1.92817	1.1177	0	0	-0.300685	0.146529	14.6529	0	0
Spain	2009	0	1	1.17699	1.156	1.18705	0.941682	1.05495	-0.4746	5.28383	12.2	26.078	-79.57	36.8993	-0.0353108	-32.482	-3.07	-0.00144114	-0.0527131	0	-0.542734	-0.00106657	-0.000374564	1.58016	-346.042	-3.76813	0.638106	78.21	46.8367	17.857	0.231283	1.97476	1.14342	0	1	-0.296412	0.147871	14.7871	0	0
Spain	2010	0	0	1.12254	1.15679	1.15819	0.942974	1.16004	-0.318044	5.40998	14.4	33.4906	-75.82	37.0899	-0.0583461	-31.4838	-3.07	-0.00923298	-0.0501165	0	-0.557236	-0.00188915	-0.00734383	1.60108	-330.671	0.0941223	2.5637	78.442	52.6934	19.86	0.292838	1.72173	1.00371	0	0	-0.280422	0.152893	15.2893	0	0
Spain	2011	0	1	1.08587	1.16938	1.06074	0.972401	1.16321	0.0211045	6.0062	14.7	30.5731	-76.33	37.1019	-0.0652562	-31.5378	-3.04	-0.013671	-0.0489692	0	-0.562699	-0.00189801	-0.011773	1.53888	-330.701	-0.639921	1.80375	78.673	58.5118	21.39	-0.145959	1.7487	1.0186	0	1	-0.283032	0.152073	15.2073	0	0
Spain	2012	0	1	1.06418	1.0378	0.947155	1.05716	1.17041	-0.0295164	6.43677	15.8	30.4411	-74.83	37.0798	-0.0730629	-33.0486	-3.13	-0.0199805	-0.0482268	0	-0.636624	-0.00169981	-0.0182807	1.52977	-325.841	-2.86511	1.56638	78.902	60.554	24.789	-0.202955	1.63225	0.954305	0	1	-0.275367	0.154481	15.4481	0	0
Spain	2013	0	1	0.988832	1.02537	0.932681	1.16769	0.92699	0.0120178	6.25563	16.9	40.4695	-72.37	37.0821	-0.0627349	-29.0917	-2.96	-0.0168037	-0.0456372	0	-0.5829	-0.00484428	-0.0119594	1.71461	-298.878	-1.42732	3.46086	79.133	61.6688	26.094	0.438175	1.55041	0.909118	0	1	-0.26842	0.156662	15.6662	0	0
Spain	2014	0	0	0.993712	0.966456	0.746454	1.1733	0.68924	0.243122	6.30149	17.3	40.9223	-71.32	37.0844	-0.0606478	-29.5495	-2.86	-0.013834	-0.042881	0	-0.593599	-0.00311101	-0.010723	1.64155	-294.998	1.52049	2.31642	79.366	63.3993	24.441	-0.220687	1.58153	0.926298	0	0	-0.269685	0.156265	15.6265	0	0
Spain	2015	1	0	1.04487	0.886067	0.791498	1.15725	0.630987	0.24116	6.06974	16.3	35.7116	-73.07	37.1275	-0.0478923	-28.3363	-2.85	-0.00840847	-0.0402139	0	-0.745181	-0.00116426	-0.00724422	1.68132	-305.115	4.06087	1.97132	79.602	63.582	22.057	0.552442	1.5192	0.891886	1	0	-0.271252	0.155773	15.5773	0	0
Spain	2016	0	0	1.0416	0.965353	0.996484	1.09487	0.569826	0.402214	5.82096	16.7	39.3498	-71.99	37.1429	-0.0419317	-28.0764	-2.78	-0.0071103	-0.0360133	0	-0.717385	-0.000418377	-0.00669192	1.6345	-296.418	2.91516	3.61722	79.84	63.1887	19.635	0.372183	1.68735	0.984729	0	0	-0.269545	0.156309	15.6309	0	0
Spain	2017	0	0	1.0215	1.02435	0.930761	1.00126	0.51028	0.270846	5.84428	15.2	32.8921	-74.17	37.1522	-0.0530656	-27.0629	-2.84	-0.0137046	-0.0339722	0	-0.750342	-0.000449964	-0.0132546	1.60832	-309.224	2.89604	2.54039	80.08	66.1674	17.224	1.25794	1.59621	0.934405	0	0	-0.274266	0.154827	15.4826	0	0
Spain	2018	0	0	1.02963	0.978094	0.938154	0.969246	0.612779	0.275906	6.22455	16.9	38.7587	-73.17	37.1566	-0.0630078	-26.4469	-2.77	-0.0171948	-0.0335424	0	-0.707322	-0.000668666	-0.0165261	1.64765	-301.815	2.39541	4.46749	80.321	67.0094	15.255	1.18735	1.6473	0.962616	0	0	-0.268901	0.156511	15.6511	0	0
Spain	2019	0	0	1.036	0.990192	1.03726	0.968809	0.666395	0.292769	6.4151	16.7	37.7725	-72.1	37.1677	-0.0390101	-26.272	-2.64	-0.00981581	-0.033225	0	-0.700617	-0.000471066	-0.00934475	1.62866	-284.143	1.96118	2.16052	80.565	66.3662	14.104	1.42867	1.81701	1.05632	0	0	-0.274666	0.154701	15.4701	0	0
Spain	2020	0	1	1.00401	0.860964	0.755449	0.853929	0.711802	0.411448	6.92456	19.3	44.5277	-68.7	37.1773	-0.0381216	-26.0971	-2.67	-0.0085269	-0.0364697	0	-0.685729	-6.00026e-05	-0.0084669	1.53894	-245.978	-10.9401	2.92166	80.81	59.4461	15.532	1.13391	1.68156	0.981532	0	1	-0.260915	0.15902	15.9019	0	0
Sweden	2002	0	0	1.50778	1.84247	1.59024	1.96259	2.2004	1.47526	14.8065	35.9	48.509	-37.95	69.0947	-0.321565	-1.56491	-5.74	-0.00885063	-0.0264326	0	-0.406802	-0.00150468	-0.00734594	2.70219	-27.3923	2.27767	6.8749	84.133	77.0849	4.965	1.62347	0.191561	0.158811	0	0	0.017045	0.246317	24.6317	0	0
Sweden	2003	0	0	1.54861	1.88671	1.61025	2.0169	2.14788	1.34161	15.991	34.6	43.4068	-37.03	69.0726	-0.263509	-1.55614	-5.49	-0.00861583	-0.0240388	0	-0.34118	-0.00140447	-0.00721136	2.72293	-30.4776	1.88094	1.79831	84.196	75.3278	5.555	1.84786	0.204472	0.16594	0	0	-0.0001811	0.240907	24.0907	0	0
Sweden	2004	1	0	1.73925	1.87256	1.66941	2.09974	2.13265	1.36223	15.7217	35.5	44.9731	-35.41	69.0505	-0.238576	-1.54737	-5.46	-0.0332647	-0.022295	0	-0.305279	-0.00217424	-0.0310905	2.66182	-31.6011	4.17953	4.38299	84.258	78.7355	6.693	0.414635	0.243294	0.187376	1	0	0.0020397	0.241605	24.1605	0	0
Sweden	2005	0	0	1.58447	1.79775	1.53287	1.8879	2.0128	1.2999	16.9064	39.3	51.3158	-34.4	69.0284	-0.436647	-1.5386	-5.18	-0.0676853	-0.0207441	0	-0.293843	-0.00355809	-0.0641272	2.70503	-25.955	2.79318	5.3059	84.319	84.1675	7.81	0.764453	0.243421	0.187446	0	0	0.0075763	0.243344	24.3344	0	0
Sweden	2006	1	0	1.48572	1.85118	1.43955	1.80057	2.18632	1.29393	18.4852	40.1	49.6464	-33.92	69.0063	-0.441406	-1.5383	-4.82	-0.150414	-0.0196621	0	-0.276269	-0.00540371	-0.14501	2.5978	-19.4059	4.676	5.21919	84.43	88.3298	7.066	1.74607	0.282984	0.209291	1	0	-0.0020612	0.240317	24.0317	0	0
Sweden	2007	0	0	1.51014	1.89183	1.573	2.01872	2.23398	1.27148	19.0802	41.8	52.0588	-33.04	68.9842	-0.649094	-1.53801	-4.64	-0.172069	-0.0194653	0	-0.239938	-0.00825954	-0.163809	2.50508	-19.0325	3.22491	9.41608	84.588	89.5464	6.161	2.92413	0.0719721	0.0927785	0	0	0.0002316	0.241037	24.1037	0	0
Sweden	2008	0	1	1.52017	1.91916	1.63588	1.94698	2.21141	1.12834	19.5013	43.2	54.3532	-33.82	68.9621	-0.653208	-1.54951	-4.63	-0.131167	-0.0199938	0	-0.231265	-0.0139292	-0.117237	2.56504	-17.7317	-0.923123	8.05193	84.746	92.8079	6.235	3.36159	0.0364286	0.0731528	0	1	0.0016466	0.241481	24.1481	0	0
Sweden	2009	0	1	1.54604	1.95828	1.6497	2.04168	2.2427	1.08464	22.2873	45.7	58.4596	-32.69	68.94	-0.344273	-1.56101	-4.43	-0.0760375	-0.0212363	0	-0.265064	-0.0124815	-0.063556	2.6604	-13.0405	-4.25557	2.06323	84.902	81.9579	8.351	2.3589	-0.129775	-0.0186189	0	1	-0.0001662	0.240912	24.0912	0	0
Sweden	2010	1	0	1.54273	1.93031	1.65624	1.96262	2.21973	1.09417	22.0322	44.7	55.3279	-35.01	68.9179	-1.41417	-1.57251	-4.7	-0.369839	-0.0195903	0	-0.270081	-0.0151368	-0.354703	2.56812	-16.3787	5.75074	0.126859	85.056	85.091	8.61	1.03026	-0.148563	-0.0289929	1	0	0.0264716	0.249278	24.9278	0	0
Sweden	2011	0	0	1.61296	1.91804	1.89224	1.9252	2.16804	1.23069	21.0421	45.4	55.9889	-34.83	68.8722	-1.69577	-1.53579	-4.45	-0.463777	-0.0180099	0	-0.22699	-0.022073	-0.441704	2.37364	-10.9756	3.16391	1.22329	85.297	86.3903	7.804	1.1173	-0.133257	-0.0205411	0	0	0.0243107	0.248599	24.8599	0	0
Sweden	2012	0	1	1.69036	1.92828	1.90004	1.91104	2.27712	1.1706	22.7222	48.3	59.0985	-31.34	68.8266	-1.06629	-1.49906	-4.52	-0.143864	-0.016833	0	-0.231678	-0.0199927	-0.123871	2.3889	-8.15384	-0.414466	0.77737	85.62	85.2977	7.976	0.949518	-0.298258	-0.111649	0	1	0.02149	0.247714	24.7713	0	0
Sweden	2013	0	0	1.65804	1.9506	1.89547	1.789	2.23943	1.12778	22.9271	47.3	54.074	-30.28	68.7809	-1.00193	-1.46234	-4.41	-0.0949331	-0.0149108	0	-0.218404	-0.0155009	-0.0794322	2.33493	-7.91454	1.13772	0.254696	85.936	81.6398	8.052	1.01165	-0.204303	-0.0597702	0	0	0.0101345	0.244147	24.4147	0	0
Sweden	2014	0	0	1.61102	1.97515	1.80516	1.68138	2.11085	1.06541	23.2147	48.6	55.8687	-29.93	68.7353	-0.908727	-1.42561	-4.19	-0.0734052	-0.0126044	0	-0.221432	-0.0134461	-0.059959	2.19211	-7.96533	2.29576	-1.04543	86.247	83.8226	7.954	1.83271	-0.352661	-0.141688	0	0	0.0056093	0.242726	24.2726	0	0
Sweden	2015	1	0	1.56545	1.99033	1.8038	1.68485	2.14546	0.93267	26.2558	51.9	63.3043	-26.06	68.6945	-0.48816	-1.38889	-3.7	-0.0702081	-0.0112034	0	-0.267659	-0.0075069	-0.0627012	2.19519	-9.53288	4.41014	1.94889	86.553	84.1572	7.432	2.25343	-0.46683	-0.204728	1	0	0.0017155	0.241503	24.1503	0	0
Sweden	2016	0	0	1.56508	1.95228	1.84277	1.66307	2.10578	1.00078	25.5605	50.9	57.2051	-27.07	68.6945	-0.722467	-1.40152	-3.9	-0.0813363	-0.010614	0	-0.268525	-0.00595754	-0.0753788	2.23189	-10.5255	2.34974	3.00854	86.852	83.2638	6.99	1.65202	-0.425068	-0.181668	0	0	0.0031993	0.241969	24.1969	0	0
Sweden	2017	0	0	1.56945	1.8197	1.79005	1.67575	2.09996	0.968603	26.6671	51.8	57.8893	-26.17	68.6945	-1.04602	-1.41415	-3.91	-0.135654	-0.00998486	0	-0.260298	-0.00765766	-0.127996	2.15701	-16.1659	1.82516	4.53384	87.146	85.9213	6.718	2.22655	-0.645331	-0.303289	0	0	0.0139253	0.245338	24.5338	0	0
Sweden	2018	0	0	1.5808	1.78408	1.8255	1.67109	2.10964	0.921418	24.7565	51.6	55.8097	-27.9	68.6945	-1.0611	-1.42678	-3.91	-0.165516	-0.00993128	0	-0.249083	-0.0201589	-0.145357	2.1089	-16.6162	1.90296	-0.129537	87.431	90.1297	6.365	2.61612	-0.729208	-0.349603	0	0	0.009065	0.243811	24.3811	0	0
Sweden	2019	0	0	1.55906	1.79216	1.79326	1.67401	2.09195	1.01189	26.8414	52.9	58.7483	-26.13	68.6997	-0.40478	-1.43942	-3.73	-0.119056	-0.00957254	0	-0.259718	-0.0191894	-0.0998666	2.09706	-13.5147	2.54965	2.98448	87.708	92.5211	6.833	2.42065	-0.651465	-0.306676	0	0	0.0007219	0.241191	24.1191	0	0
[truncated: 229 more rows]

## Sheet: GDP
Country	year	VA	RL	RQ	GE	CC	PV	FEC	ELC	COMM	FRST	TOTL	H2O	PRIM	DRES	DPEM	DFOR	DCO2	DNGY	DMIN	TAX	GHG	GDP	FDI	UR	TRADE	UNE	INF	IQ_RAW	IQ	GAI_RAW	GAI
[truncated: 1,596 more rows]

## Sheet: Sheet2
Country	year	CRNW	FEC	ELC	COMM	FRST	TOTL	H2O	PRIM	DRES	DPEM	DFOR	DCO2	DNGY	DMIN	TAX	GHG
[truncated: 1,558 more rows]

## Sheet: Sheet1
EG.FEC.RNEW.ZS
EG.ELC.RNEW.ZS
AG.LND.FRST.ZS
[truncated: 25 more rows]
